# Supplementary material for: Integrated Analyses Reveal Overexpressed Notch1 Promoting Porcine Satellite Cells’ Proliferation through Regulating the Cell Cycle
Source: Int J Mol Sci. 2018 Jan 16;19(1):271. doi: 10.3390/ijms19010271 (PMC5796217; doi:10.3390/ijms19010271)
Supplement: Supplementary file 1 [file ijms-19-00271-s001.xlsx]

## Sheet: Table S1
#ID	E2_Count	E1_Count	E2_FPKM	E1_FPKM	FDR	log2FC			#ID	E4_Count	E3_Count	E4_FPKM	E3_FPKM	FDR	log2FC
ENSSSCG00000002983	8	0	2.04664	0	0.783537	NA			ENSSSCG00000021550	1	15	1.53184	12.0995	0.628486	3.03363
ENSSSCG00000030876	9	0	41.9266	0	0.64985	NA			ENSSSCG00000027126	2	11	1.35382	5.51698	0.983679	2.015
ENSSSCG00000011700	19	1	2.03696	0.198754	0.024046	-3.35706			ENSSSCG00000021071	15	55	1.59896	5.4669	0.0166323	1.80127
ENSSSCG00000023909	17	1	2.50175	0.278535	0.0750879	-3.16722			ENSSSCG00000010825	10	29	1.7164	5.03877	0.916571	1.4428
ENSSSCG00000021374	9	0	4.99876	0.482322	0.64985	-3.37358			ENSSSCG00000014895	5	16	1.76754	4.63628	0.985567	1.50308
ENSSSCG00000001787	72	21	2.20487	0.504422	0.000576282	-2.12807			ENSSSCG00000025743	7	19	1.71465	4.43702	0.986436	1.31916
ENSSSCG00000022566	13	2	2.78024	0.56454	0.758467	-2.30014			ENSSSCG00000021637	18	36	1.99565	4.28582	0.981468	0.953661
ENSSSCG00000002919	8	1	2.64234	0.57994	0.939837	-2.18792			ENSSSCG00000016231	6	22	1.05401	4.21723	0.920134	1.71578
ENSSSCG00000027024	32	9	2.09229	0.591052	0.209254	-1.82362			ENSSSCG00000017767	6	15	1.79572	4.19512	0.994365	1.19054
ENSSSCG00000016437	33	6	3.22201	0.603015	0.0123033	-2.41773			ENSSSCG00000024939	22	47	1.94132	4.05416	0.929283	1.05318
ENSSSCG00000017383	52	13	2.75952	0.681391	0.00227796	-2.01783			ENSSSCG00000021381	4	9	1.96083	4.03149	0.998133	1.00024
ENSSSCG00000005971	21	6	2.01068	0.700059	0.713763	-1.52206			ENSSSCG00000020914	3	8	1.92155	4.02168	0.997939	1.17415
ENSSSCG00000002032	60	18	2.63109	0.706112	0.00461908	-1.89772			ENSSSCG00000029023	9	24	1.55832	3.98125	0.973728	1.31758
ENSSSCG00000007799	9	2	2.25443	0.707652	0.959602	-1.67153			ENSSSCG00000014202	9	19	1.74063	3.94821	0.994659	0.994771
ENSSSCG00000007073	38	13	2.0092	0.738134	0.284561	-1.44473			ENSSSCG00000001941	5	11	1.74881	3.79906	0.997637	0.998413
ENSSSCG00000016444	22	8	2.01831	0.742567	0.856752	-1.44248			ENSSSCG00000025470	10	22	1.75132	3.77104	0.991406	1.05858
ENSSSCG00000004314	27	8	2.45598	0.759812	0.480535	-1.69262			ENSSSCG00000021423	6	13	1.8532	3.69933	0.997058	0.997109
ENSSSCG00000009648	81	27	2.19937	0.770906	0.00132021	-1.51249			ENSSSCG00000005856	1	10	0.742327	3.67153	0.970463	2.49055
ENSSSCG00000024290	16	2	3.75975	0.771001	0.387661	-2.28585			ENSSSCG00000015798	7	18	1.44904	3.64713	0.990445	1.24493
ENSSSCG00000009209	25	7	2.55709	0.782213	0.501911	-1.7089			ENSSSCG00000025897	2	10	1.01368	3.63565	0.990088	1.8888
ENSSSCG00000016381	178	47	3.71061	0.902448	2.55337e-10	-2.03981			ENSSSCG00000026991	11	23	1.87867	3.56671	0.992321	0.993864
ENSSSCG00000017601	26	11	2.03684	0.913982	0.877722	-1.15604			ENSSSCG00000028044	7	27	0.967236	3.5154	0.749042	1.80585
ENSSSCG00000022513	13	3	3.38218	0.940323	0.890427	-1.84677			ENSSSCG00000030263	22	42	1.83673	3.49597	0.979294	0.894271
ENSSSCG00000015816	23	9	2.23488	0.964171	0.877998	-1.21281			ENSSSCG00000023063	0	15	0	3.49043	0.168993	4.08519
ENSSSCG00000000674	13	2	4.97946	0.980985	0.758467	-2.34368			ENSSSCG00000005400	41	46	1.86587	3.47539	0.99843	0.152085
ENSSSCG00000027724	45	7	4.91023	0.98545	0.000141702	-2.31685			ENSSSCG00000009589	8	15	1.78823	3.41939	0.997461	0.824838
ENSSSCG00000012235	26	17	3.03031	1.01799	0.979369	-1.57372			ENSSSCG00000012157	47	71	1.13547	3.39317	0.989434	0.575134
ENSSSCG00000027944	11	2	4.30411	1.03611	0.898192	-2.05455			ENSSSCG00000004096	8	17	1.61909	3.18861	0.995586	0.995376
ENSSSCG00000017585	41	16	2.57654	1.0386	0.432601	-1.31077			ENSSSCG00000006052	43	64	1.87819	3.11793	0.992153	0.553162
ENSSSCG00000027916	23	13	2.04344	1.05428	0.970922	-0.954686			ENSSSCG00000005020	37	60	1.9278	3.09404	0.986035	0.673299
ENSSSCG00000010055	75	23	3.67979	1.05758	0.000785494	-1.79883			ENSSSCG00000011307	7	11	1.90716	3.09388	0.998696	0.579257
ENSSSCG00000021637	22	8	2.5945	1.08941	0.856752	-1.25192			ENSSSCG00000001634	16	40	1.37536	3.06553	0.875086	1.26306
ENSSSCG00000015309	12	5	2.07829	1.09348	0.976725	-0.926451			ENSSSCG00000008200	11	25	1.40736	3.00349	0.986223	1.10962
ENSSSCG00000003439	138	11	13.7088	1.1046	0	-3.63351			ENSSSCG00000031001	12	16	1.96627	3.00304	0.998683	0.378744
ENSSSCG00000029849	21	6	3.49992	1.10847	0.713763	-1.6587			ENSSSCG00000030921	11	30	1.12	2.97398	0.932357	1.36393
ENSSSCG00000000477	53	24	2.23159	1.10897	0.472384	-1.00882			ENSSSCG00000029917	9	24	1.23085	2.97177	0.973728	1.31758
ENSSSCG00000015773	8	3	2.41147	1.13158	0.985656	-1.09157			ENSSSCG00000000764	15	25	1.86926	2.96899	0.996457	0.692537
ENSSSCG00000012480	21	6	3.21292	1.13212	0.713763	-1.50487			ENSSSCG00000026544	3	13	0.829521	2.96868	0.982657	1.81509
ENSSSCG00000003077	41	21	2.07351	1.14484	0.856385	-0.856972			ENSSSCG00000001734	8	16	1.6858	2.96413	0.996683	0.912626
ENSSSCG00000023611	247	97	3.21786	1.15679	9.16917e-07	-1.47598			ENSSSCG00000000117	20	32	1.90939	2.95168	0.995768	0.643431
ENSSSCG00000010411	54	23	2.68649	1.16977	0.311337	-1.19947			ENSSSCG00000030224	12	20	1.7418	2.92262	0.997351	0.684586
ENSSSCG00000016368	8	4	2.17488	1.18099	0.990277	-0.88094			ENSSSCG00000014152	21	34	1.85018	2.90874	0.995101	0.661146
ENSSSCG00000006072	16	6	2.58299	1.18298	0.944601	-1.1266			ENSSSCG00000023744	45	73	1.96236	2.90225	0.978187	0.676185
ENSSSCG00000008944	17	6	2.74718	1.18501	0.922286	-1.21307			ENSSSCG00000015647	52	79	1.93998	2.89251	0.98644	0.584109
ENSSSCG00000023243	30	15	2.30666	1.19216	0.920233	-0.952204			ENSSSCG00000017574	3	10	1.05688	2.88672	0.995421	1.46545
ENSSSCG00000002935	44	17	2.80453	1.22734	0.332792	-1.19226			ENSSSCG00000010023	25	41	1.83793	2.81758	0.99283	0.682905
ENSSSCG00000024122	63	12	6.57782	1.228	1.1232e-05	-2.42129			ENSSSCG00000006023	25	40	1.73269	2.81154	0.994052	0.648088
ENSSSCG00000013564	75	55	2.06651	1.23281	0.963621	-0.745251			ENSSSCG00000005771	14	19	1.99614	2.81091	0.998488	0.406528
ENSSSCG00000017646	19	10	2.0477	1.23546	0.972616	-0.728909			ENSSSCG00000011422	29	46	1.84104	2.80351	0.992873	0.638445
ENSSSCG00000010556	26	14	2.34098	1.24456	0.957115	-0.911443			ENSSSCG00000006757	31	51	1.71889	2.79421	0.988873	0.691163
ENSSSCG00000029400	29	12	2.94993	1.24577	0.818469	-1.24359			ENSSSCG00000001943	57	75	1.94449	2.79109	0.996128	0.379831
ENSSSCG00000002864	55	17	4.17921	1.25014	0.0133186	-1.74118			ENSSSCG00000006093	50	69	1.82827	2.78363	0.995056	0.446874
ENSSSCG00000029247	23	16	2.08928	1.26396	0.984786	-0.725023			ENSSSCG00000000134	20	31	1.9153	2.76198	0.996475	0.598954
ENSSSCG00000026520	48	28	2.42426	1.26461	0.910508	-0.938887			ENSSSCG00000004638	7	16	1.18439	2.75245	0.995073	1.08392
ENSSSCG00000029894	82	55	2.00527	1.26822	0.920607	-0.661036			ENSSSCG00000002375	35	56	1.82683	2.74672	0.989126	0.653496
ENSSSCG00000014434	14	11	2.1371	1.26969	0.991343	-0.751167			ENSSSCG00000004716	14	20	1.96428	2.745	0.998251	0.477127
ENSSSCG00000029587	9	4	2.5549	1.27119	0.986773	-1.00708			ENSSSCG00000014149	16	33	1.49277	2.74027	0.982383	0.992533
ENSSSCG00000021258	12	7	2.25873	1.27121	0.988117	-0.829302			ENSSSCG00000016348	47	68	1.94837	2.73386	0.993102	0.51368
ENSSSCG00000011463	53	27	2.17157	1.291	0.726134	-0.750269			ENSSSCG00000002900	15	28	1.57432	2.73102	0.993031	0.850429
ENSSSCG00000003784	11	4	2.73408	1.29604	0.973622	-1.077			ENSSSCG00000015621	45	75	1.77095	2.72189	0.969251	0.71469
ENSSSCG00000006114	22	9	3.09127	1.30107	0.909019	-1.24848			ENSSSCG00000025550	13	20	1.6142	2.72169	0.997893	0.577131
ENSSSCG00000009169	22	14	2.04468	1.32893	0.981334	-0.621657			ENSSSCG00000010380	17	23	1.81979	2.6919	0.998292	0.40617
ENSSSCG00000008835	33	20	2.19077	1.32987	0.962062	-0.72014			ENSSSCG00000012994	22	32	1.92573	2.68198	0.997179	0.51178
ENSSSCG00000021493	32	21	2.0428	1.34236	0.974198	-0.605733			ENSSSCG00000029247	14	30	1.49414	2.66403	0.983157	1.04036
ENSSSCG00000004109	50	35	2.0111	1.36118	0.968188	-0.563106			ENSSSCG00000030518	10	19	1.61664	2.65885	0.99627	0.856372
ENSSSCG00000003995	43	26	2.03432	1.36548	0.941233	-0.575103			ENSSSCG00000028106	14	25	1.59061	2.65489	0.995346	0.786056
ENSSSCG00000028794	74	52	2.05754	1.36944	0.951704	-0.587349			ENSSSCG00000000279	12	25	1.46267	2.64126	0.990862	0.993516
ENSSSCG00000003006	35	22	2.21901	1.37025	0.965091	-0.695418			ENSSSCG00000001244	24	38	1.90164	2.63734	0.994821	0.632563
ENSSSCG00000027014	9	5	2.09211	1.3779	0.990415	-0.602481			ENSSSCG00000024724	12	22	1.47919	2.63601	0.995824	0.816196
ENSSSCG00000009138	28	15	2.32092	1.39737	0.949769	-0.731939			ENSSSCG00000003552	8	15	1.40983	2.61837	0.997461	0.824838
ENSSSCG00000024817	83	55	2.01178	1.4011	0.91046	-0.521927			ENSSSCG00000020792	12	17	1.76726	2.61497	0.998479	0.461494
ENSSSCG00000007379	98	19	7.64014	1.40156	1.09262e-08	-2.44652			ENSSSCG00000006525	3	10	1.70421	2.61397	0.995421	1.46545
ENSSSCG00000008973	34	23	2.05731	1.40343	0.975539	-0.551826			ENSSSCG00000030358	45	62	1.99021	2.608	0.995657	0.443804
ENSSSCG00000026550	18	11	2.06397	1.4037	0.983337	-0.556208			ENSSSCG00000008742	31	38	1.99213	2.60598	0.998205	0.275561
ENSSSCG00000004452	67	12	7.31674	1.40532	2.13465e-06	-2.38031			ENSSSCG00000022294	29	47	1.47058	2.59	0.991469	0.668858
ENSSSCG00000022908	16	6	2.94531	1.40769	0.944601	-1.06507			ENSSSCG00000000858	3	8	1.09303	2.58625	0.997939	1.17415
ENSSSCG00000030485	54	40	2.15167	1.4078	0.97443	-0.612035			ENSSSCG00000000933	13	17	1.92605	2.57473	0.998675	0.354038
ENSSSCG00000004249	66	31	2.67599	1.40793	0.337621	-0.926533			ENSSSCG00000016579	67	108	1.6626	2.57399	0.944801	0.670707
ENSSSCG00000022500	38	18	2.89951	1.41614	0.812792	-1.03388			ENSSSCG00000009630	15	21	1.97188	2.56896	0.998267	0.450913
ENSSSCG00000003731	66	43	2.27698	1.42065	0.927751	-0.680532			ENSSSCG00000013333	17	25	1.67149	2.56515	0.997705	0.52193
ENSSSCG00000028725	41	25	2.52585	1.43478	0.948237	-0.815948			ENSSSCG00000021112	31	41	1.83789	2.56445	0.997577	0.382637
ENSSSCG00000030898	61	31	2.86915	1.45103	0.617411	-0.983601			ENSSSCG00000025220	26	38	1.73718	2.56179	0.996531	0.521241
ENSSSCG00000000857	73	10	13.7596	1.45126	1.69173e-08	-3.24502			ENSSSCG00000020699	5	11	1.25361	2.55131	0.997637	0.998413
ENSSSCG00000027868	26	18	2.11857	1.45772	0.982779	-0.539417			ENSSSCG00000024627	11	16	1.72708	2.52062	0.99847	0.494852
ENSSSCG00000026407	36	22	2.67442	1.46855	0.958358	-0.864774			ENSSSCG00000023854	18	30	1.61609	2.52053	0.995367	0.697943
ENSSSCG00000017508	56	40	2.18816	1.47268	0.967907	-0.571281			ENSSSCG00000009836	15	28	1.35993	2.51716	0.993031	0.850429
ENSSSCG00000001063	44	30	2.06779	1.4759	0.968423	-0.486502			ENSSSCG00000017602	20	24	1.84708	2.50693	0.998618	0.242039
ENSSSCG00000010300	27	16	2.35932	1.47643	0.969043	-0.676275			ENSSSCG00000027042	34	40	1.87697	2.50387	0.998345	0.218275
ENSSSCG00000015894	56	27	2.68499	1.48274	0.567663	-0.856695			ENSSSCG00000014891	48	94	1.37424	2.50028	0.61847	0.945572
ENSSSCG00000028808	9	5	2.41452	1.48429	0.990415	-0.701942			ENSSSCG00000003600	17	43	1.04123	2.4987	0.817055	1.28231
ENSSSCG00000020818	59	44	2.04046	1.49664	0.973387	-0.447234			ENSSSCG00000013566	27	34	1.97662	2.49078	0.998179	0.312267
ENSSSCG00000006766	44	31	2.00598	1.49735	0.973081	-0.421862			ENSSSCG00000004976	16	22	1.58992	2.48873	0.998281	0.427393
ENSSSCG00000028699	27	18	2.35885	1.50039	0.979858	-0.652767			ENSSSCG00000011808	6	9	1.87355	2.48317	0.998934	0.509158
ENSSSCG00000011049	30	19	2.21839	1.508	0.972519	-0.556883			ENSSSCG00000009925	33	45	1.74876	2.48156	0.997016	0.426421
ENSSSCG00000010884	19	6	3.97076	1.51286	0.847288	-1.39211			ENSSSCG00000000449	32	45	1.87569	2.4803	0.996536	0.469577
ENSSSCG00000009489	17	4	5.26539	1.51343	0.748995	-1.79875			ENSSSCG00000026189	10	14	1.65162	2.47968	0.998695	0.439864
ENSSSCG00000009125	208	147	2.02445	1.51838	0.85208	-0.415014			ENSSSCG00000021298	53	63	1.98046	2.47918	0.99795	0.234905
ENSSSCG00000022902	32	19	2.31289	1.52831	0.960244	-0.597775			ENSSSCG00000028165	22	26	1.74861	2.45738	0.998602	0.22168
ENSSSCG00000017824	20	15	2.03367	1.52879	0.988458	-0.411707			ENSSSCG00000008199	18	25	1.72221	2.45069	0.998059	0.44364
ENSSSCG00000027725	48	24	3.16773	1.53839	0.756652	-1.04201			ENSSSCG00000004109	39	60	1.67106	2.44992	0.990885	0.599169
ENSSSCG00000007707	33	13	3.98013	1.54508	0.675956	-1.3651			ENSSSCG00000025844	14	18	1.9023	2.44935	0.998668	0.332295
ENSSSCG00000026262	27	12	3.03997	1.54644	0.891864	-0.975158			ENSSSCG00000008081	10	15	1.85178	2.44616	0.998458	0.533341
ENSSSCG00000025335	35	20	2.41455	1.54865	0.944266	-0.640727			ENSSSCG00000029557	30	48	1.74884	2.44517	0.991869	0.651232
ENSSSCG00000026732	75	39	3.22487	1.55528	0.496762	-1.05206			ENSSSCG00000008977	6	11	1.39154	2.44331	0.998327	0.773665
ENSSSCG00000015981	16	10	2.31148	1.56015	0.98606	-0.567098			ENSSSCG00000003190	8	13	1.7357	2.43928	0.998415	0.631405
ENSSSCG00000017823	25	18	2.36338	1.57593	0.985093	-0.584688			ENSSSCG00000020894	9	15	1.45234	2.4331	0.998083	0.67174
ENSSSCG00000023615	8	1	6.3398	1.57694	0.939837	-2.00735			ENSSSCG00000016674	24	34	1.74344	2.43042	0.997297	0.476186
ENSSSCG00000011681	22	12	2.41695	1.58144	0.969247	-0.612015			ENSSSCG00000013018	110	167	1.69713	2.41448	0.93044	0.587613
ENSSSCG00000029002	20	17	2.00557	1.58674	0.990435	-0.338005			ENSSSCG00000027166	42	60	1.72934	2.4037	0.994693	0.494661
ENSSSCG00000023293	10	4	3.10939	1.58853	0.981517	-0.968971			ENSSSCG00000015115	45	55	1.9632	2.39857	0.997857	0.273704
ENSSSCG00000023014	41	31	2.13587	1.60017	0.981207	-0.416592			ENSSSCG00000010212	37	29	1.37838	2.39662	0.997902	-0.35204
ENSSSCG00000004390	25	9	3.72292	1.60044	0.784052	-1.21799			ENSSSCG00000003650	10	19	1.17782	2.38939	0.99627	0.856372
ENSSSCG00000025254	33	19	2.39234	1.60827	0.95163	-0.572862			ENSSSCG00000003478	56	75	1.91653	2.3697	0.995629	0.404951
ENSSSCG00000024002	38	26	2.19629	1.60934	0.973666	-0.448642			ENSSSCG00000016838	17	18	1.99396	2.36626	0.998885	0.0681686
ENSSSCG00000010110	29	14	3.39957	1.61014	0.912543	-1.07821			ENSSSCG00000027903	22	26	1.96708	2.36283	0.998602	0.22168
ENSSSCG00000013333	23	15	2.32471	1.61913	0.981781	-0.521852			ENSSSCG00000010556	18	26	1.66164	2.3597	0.997749	0.498213
ENSSSCG00000030757	18	10	2.38426	1.62749	0.978478	-0.550908			ENSSSCG00000015607	34	45	1.80028	2.35847	0.997389	0.384518
ENSSSCG00000011582	138	89	2.58734	1.63406	0.741538	-0.662951			ENSSSCG00000000376	19	28	1.59516	2.35292	0.997417	0.527273
ENSSSCG00000016873	41	27	2.34726	1.63621	0.965519	-0.520653			ENSSSCG00000006239	13	16	1.85996	2.35144	0.998815	0.271288
ENSSSCG00000027614	11	3	4.40853	1.64517	0.952563	-1.42202			ENSSSCG00000015981	10	16	1.52943	2.34959	0.998134	0.621128
ENSSSCG00000021916	10	6	2.45076	1.64799	0.990454	-0.572537			ENSSSCG00000026443	27	35	1.8769	2.34297	0.997981	0.352978
ENSSSCG00000022201	10	5	2.86235	1.64908	0.987437	-0.795546			ENSSSCG00000023861	75	93	1.98856	2.3402	0.996941	0.296367
ENSSSCG00000007118	61	41	2.38668	1.65654	0.948292	-0.526879			ENSSSCG00000015786	21	22	1.94206	2.33906	0.998813	0.0541114
ENSSSCG00000024830	19	16	2.17975	1.65905	0.99057	-0.393795			ENSSSCG00000024207	5	16	0.850996	2.33745	0.985567	1.50308
ENSSSCG00000001794	13	5	3.88075	1.66086	0.967412	-1.22439			ENSSSCG00000014168	29	33	1.96682	2.32505	0.998554	0.170603
ENSSSCG00000022599	17	9	2.96087	1.66384	0.977308	-0.831554			ENSSSCG00000025208	21	27	1.98437	2.3193	0.998321	0.338589
ENSSSCG00000023703	25	19	2.01856	1.66751	0.986948	-0.275668			ENSSSCG00000021258	2	13	0.536374	2.31925	0.955029	2.23845
ENSSSCG00000030247	38	18	3.27691	1.67361	0.812792	-0.969377			ENSSSCG00000014045	10	12	1.85055	2.31284	0.998983	0.232508
ENSSSCG00000027446	58	44	2.25186	1.6762	0.975953	-0.425948			ENSSSCG00000028350	15	21	1.67096	2.31235	0.998267	0.450913
ENSSSCG00000022911	24	20	2.0314	1.68287	0.98929	-0.271525			ENSSSCG00000026516	58	92	1.52875	2.30945	0.970122	0.646583
ENSSSCG00000006149	17	11	2.15715	1.68908	0.986283	-0.352905			ENSSSCG00000030354	63	69	1.93764	2.30199	0.998358	0.118909
ENSSSCG00000022296	28	9	4.77865	1.68941	0.550861	-1.50011			ENSSSCG00000002395	12	15	1.88855	2.29768	0.998831	0.290956
ENSSSCG00000022794	28	26	2.09649	1.69195	0.989904	-0.309253			ENSSSCG00000027206	34	42	1.69354	2.29207	0.998066	0.287088
ENSSSCG00000030742	33	11	9.07894	1.69442	0.408359	-2.42174			ENSSSCG00000021283	80	120	1.62938	2.29019	0.972584	0.568848
ENSSSCG00000024861	9	5	2.63869	1.69775	0.990415	-0.636161			ENSSSCG00000029852	46	62	1.62052	2.28891	0.996214	0.412732
ENSSSCG00000025645	25	15	2.45525	1.69797	0.97351	-0.532063			ENSSSCG00000029756	15	8	1.86712	2.2888	0.997333	-0.844393
ENSSSCG00000016334	38	29	2.30438	1.70196	0.982786	-0.43716			ENSSSCG00000003076	40	43	1.94714	2.28804	0.998551	0.0916221
ENSSSCG00000003971	36	29	2.22332	1.70277	0.985852	-0.384794			ENSSSCG00000008728	42	54	1.85456	2.28057	0.997372	0.345126
ENSSSCG00000022319	25	13	3.55157	1.70421	0.953952	-1.05937			ENSSSCG00000016201	28	35	1.90227	2.27808	0.998186	0.302232
ENSSSCG00000001537	52	26	3.56659	1.70926	0.705284	-1.06114			ENSSSCG00000029621	11	16	1.04728	2.27739	0.99847	0.494852
ENSSSCG00000017790	64	36	2.69098	1.71377	0.78987	-0.650944			ENSSSCG00000015839	7	12	1.32812	2.27681	0.998379	0.6953
ENSSSCG00000010503	48	32	2.11164	1.71646	0.960404	-0.298867			ENSSSCG00000027164	51	62	1.69309	2.27636	0.997774	0.26668
ENSSSCG00000002738	40	16	3.73465	1.71791	0.509014	-1.12035			ENSSSCG00000026657	22	40	1.2121	2.27199	0.986925	0.825459
ENSSSCG00000001943	60	44	2.18501	1.71923	0.970406	-0.345896			ENSSSCG00000025008	51	68	1.58025	2.26839	0.996137	0.398046
ENSSSCG00000023932	44	35	2.20017	1.72746	0.983544	-0.348949			ENSSSCG00000026686	22	30	1.68312	2.26623	0.997879	0.42141
ENSSSCG00000005376	63	47	2.35858	1.73678	0.971942	-0.441499			ENSSSCG00000009304	8	17	1.16797	2.26246	0.995586	0.995376
ENSSSCG00000022821	10	5	2.92458	1.74225	0.987437	-0.747246			ENSSSCG00000020782	5	8	1.44942	2.26069	0.998947	0.580919
ENSSSCG00000025593	52	40	2.28723	1.74588	0.979183	-0.389612			ENSSSCG00000024885	11	16	1.74901	2.25727	0.99847	0.494852
ENSSSCG00000023518	9	6	2.38551	1.74601	0.992261	-0.450238			ENSSSCG00000013360	30	36	1.91917	2.24981	0.998342	0.245392
ENSSSCG00000027543	14	0	25.1056	1.74999	0.0637557	-3.84258			ENSSSCG00000012829	10	17	1.36364	2.24882	0.997693	0.703879
ENSSSCG00000009431	49	37	2.09816	1.75684	0.978392	-0.256202			ENSSSCG00000029692	4	8	1.39572	2.24778	0.998629	0.847256
ENSSSCG00000011400	69	43	2.90398	1.76154	0.890405	-0.721237			ENSSSCG00000026739	12	13	1.83598	2.24603	0.999	0.0975232
ENSSSCG00000016194	39	27	2.2771	1.76356	0.974282	-0.368674			ENSSSCG00000004415	25	43	1.255	2.24456	0.989353	0.750114
ENSSSCG00000000573	35	27	2.20435	1.77044	0.984277	-0.316311			ENSSSCG00000024845	6	23	0.627536	2.22647	0.882354	1.77734
ENSSSCG00000011307	11	5	3.17529	1.77184	0.983086	-0.841677			ENSSSCG00000023851	19	30	1.5744	2.22425	0.996346	0.623684
ENSSSCG00000009074	21	15	2.23041	1.78479	0.986773	-0.32154			ENSSSCG00000026002	16	24	1.36852	2.22208	0.997654	0.547994
ENSSSCG00000007965	18	10	2.69834	1.78527	0.978478	-0.595884			ENSSSCG00000029600	12	24	0.977197	2.21109	0.993044	0.936797
ENSSSCG00000007682	45	47	2.11514	1.78614	0.988592	-0.243913			ENSSSCG00000015742	10	14	1.74978	2.21062	0.998695	0.439864
ENSSSCG00000010530	14	9	2.99018	1.79286	0.988395	-0.737947			ENSSSCG00000012150	26	28	1.55424	2.2081	0.998707	0.0930411
ENSSSCG00000022534	84	51	2.61845	1.79466	0.803552	-0.544998			ENSSSCG00000027635	5	10	1.25218	2.20779	0.998251	0.872212
ENSSSCG00000013282	39	30	2.35282	1.79513	0.982935	-0.390314			ENSSSCG00000015507	47	55	1.98459	2.20749	0.998156	0.212215
ENSSSCG00000017811	9	1	8.73421	1.80584	0.898728	-2.27404			ENSSSCG00000001344	28	36	1.79418	2.20605	0.997996	0.341826
ENSSSCG00000011999	43	16	4.16059	1.80727	0.289091	-1.20296			ENSSSCG00000027615	11	14	1.89874	2.20438	0.998848	0.313587
ENSSSCG00000015356	12	5	3.5542	1.8108	0.976725	-0.972898			ENSSSCG00000026429	68	65	1.98403	2.20207	0.998447	-0.074691
ENSSSCG00000022028	8	5	2.51375	1.81996	0.992443	-0.465931			ENSSSCG00000004561	203	209	1.94801	2.19859	0.998665	0.0312341
ENSSSCG00000000259	40	34	2.14053	1.82551	0.986956	-0.229656			ENSSSCG00000013734	44	54	1.8327	2.19319	0.997843	0.279437
ENSSSCG00000011522	51	39	2.0612	1.82665	0.978934	-0.174245			ENSSSCG00000003784	8	9	1.82786	2.18627	0.999124	0.143454
ENSSSCG00000024033	11	7	2.67084	1.83157	0.990437	-0.544167			ENSSSCG00000024290	8	9	1.86942	2.18596	0.999124	0.143454
ENSSSCG00000017258	49	24	3.79149	1.8331	0.709793	-1.04848			ENSSSCG00000006344	19	38	1.14227	2.18456	0.978422	0.955473
ENSSSCG00000005354	48	36	2.09689	1.83386	0.978095	-0.193343			ENSSSCG00000000863	25	26	1.82801	2.18296	0.998754	0.0443101
ENSSSCG00000016069	16	13	1.99991	1.83771	0.991014	-0.122027			ENSSSCG00000000682	23	33	1.59936	2.17659	0.997241	0.493349
ENSSSCG00000028164	18	13	2.44232	1.84003	0.988499	-0.408535			ENSSSCG00000029646	27	33	1.95101	2.17395	0.998339	0.270372
ENSSSCG00000030084	14	7	3.47201	1.8437	0.980279	-0.913163			ENSSSCG00000021287	14	19	1.56412	2.16806	0.998488	0.406528
ENSSSCG00000011212	36	14	4.4796	1.84451	0.571308	-1.28014			ENSSSCG00000003739	44	46	1.91874	2.1661	0.998564	0.0523934
ENSSSCG00000025579	82	35	3.92589	1.84474	0.0463258	-1.08964			ENSSSCG00000026053	28	31	1.90992	2.16162	0.998633	0.132001
ENSSSCG00000026053	34	26	2.31147	1.85123	0.98417	-0.320369			ENSSSCG00000012595	41	39	1.92471	2.16082	0.998575	-0.0809038
ENSSSCG00000030224	21	12	3.02501	1.85585	0.975467	-0.704816			ENSSSCG00000010885	31	33	1.94986	2.1599	0.998656	0.0772894
ENSSSCG00000005627	29	22	2.61783	1.86163	0.985492	-0.491812			ENSSSCG00000004902	6	9	1.66329	2.15854	0.998934	0.509158
ENSSSCG00000026799	11	8	2.34281	1.86393	0.991883	-0.329909			ENSSSCG00000007799	6	9	1.56821	2.15805	0.998934	0.509158
ENSSSCG00000026842	28	22	2.22186	1.866	0.986993	-0.251845			ENSSSCG00000007965	7	14	1.05035	2.15587	0.99729	0.902656
ENSSSCG00000015607	52	36	2.68157	1.86858	0.96469	-0.521136			ENSSSCG00000025173	39	48	1.78424	2.15579	0.99795	0.282788
ENSSSCG00000024010	71	29	3.9922	1.86878	0.0598324	-1.09507			ENSSSCG00000003393	55	83	1.58547	2.15575	0.986048	0.575017
ENSSSCG00000012787	106	105	2.02829	1.86941	0.988142	-0.117696			ENSSSCG00000006347	18	22	1.63938	2.14806	0.998634	0.26632
ENSSSCG00000001688	46	39	2.38086	1.87427	0.986096	-0.345155			ENSSSCG00000011110	10	15	1.67939	2.14534	0.998458	0.533341
ENSSSCG00000024885	14	14	2.08217	1.87486	0.992282	-0.151295			ENSSSCG00000001561	10	17	1.36458	2.14344	0.997693	0.703879
ENSSSCG00000014149	39	22	3.2665	1.8862	0.926785	-0.792263			ENSSSCG00000027155	20	33	1.34731	2.13969	0.994866	0.686578
ENSSSCG00000007963	59	52	2.15055	1.89147	0.986305	-0.185208			ENSSSCG00000009723	85	96	1.66301	2.13939	0.9981	0.163233
ENSSSCG00000008020	105	97	2.1522	1.90167	0.986836	-0.178522			ENSSSCG00000023892	22	25	1.73542	2.13819	0.998693	0.167107
ENSSSCG00000021287	19	16	2.1314	1.90506	0.99057	-0.161935			ENSSSCG00000010164	56	75	1.69659	2.13689	0.995629	0.404951
ENSSSCG00000005455	427	141	5.49338	1.90797	1.15752e-12	-1.52564			ENSSSCG00000004249	41	51	1.56986	2.13029	0.997797	0.298116
ENSSSCG00000017962	116	112	2.174	1.91206	0.987989	-0.185194			ENSSSCG00000009901	18	21	1.78521	2.12695	0.998742	0.202016
ENSSSCG00000000933	16	12	2.32564	1.91296	0.990041	-0.281766			ENSSSCG00000009352	15	20	1.59315	2.1251	0.99849	0.383608
ENSSSCG00000012284	53	36	2.47832	1.91481	0.959677	-0.372157			ENSSSCG00000002658	16	22	1.79759	2.1214	0.998281	0.427393
ENSSSCG00000000181	63	29	4.09923	1.91514	0.333364	-1.09792			ENSSSCG00000008230	16	24	1.59585	2.12077	0.997654	0.547994
ENSSSCG00000008694	37	32	2.1137	1.91574	0.987804	-0.141899			ENSSSCG00000021314	7	11	1.45099	2.11963	0.998696	0.579257
ENSSSCG00000028240	12	4	5.12889	1.9198	0.961753	-1.41769			ENSSSCG00000007427	53	57	1.98411	2.11843	0.998462	0.0927433
ENSSSCG00000005585	98	74	2.6976	1.92021	0.962782	-0.49042			ENSSSCG00000023829	62	58	1.97752	2.11723	0.998415	-0.105221
ENSSSCG00000015031	36	9	6.48193	1.92202	0.0503338	-1.75381			ENSSSCG00000010865	32	33	1.84032	2.10922	0.998674	0.0328024
ENSSSCG00000017407	43	33	2.66428	1.92426	0.981597	-0.469423			ENSSSCG00000027571	12	16	1.44307	2.10887	0.998683	0.378744
ENSSSCG00000008930	25	11	3.74133	1.92471	0.90676	-0.958906			ENSSSCG00000026118	38	68	1.253	2.10866	0.951428	0.813712
ENSSSCG00000027152	24	12	3.6152	1.92543	0.950129	-0.908917			ENSSSCG00000025911	54	95	1.30032	2.10592	0.88364	0.79382
ENSSSCG00000014880	26	26	2.09133	1.9382	0.990334	-0.109683			ENSSSCG00000005376	50	55	1.97047	2.1056	0.998416	0.124632
ENSSSCG00000015697	35	23	2.67737	1.94068	0.97143	-0.464256			ENSSSCG00000029894	55	85	1.45225	2.10276	0.981308	0.608989
ENSSSCG00000026141	67	62	2.20365	1.94084	0.987346	-0.183276			ENSSSCG00000026730	6	18	0.740422	2.10006	0.983261	1.43934
ENSSSCG00000021769	10	9	2.17458	1.94166	0.993281	-0.16343			ENSSSCG00000026550	12	18	1.35811	2.0957	0.998205	0.539754
ENSSSCG00000021155	37	25	3.14672	1.94267	0.972991	-0.695777			ENSSSCG00000004262	37	36	1.77249	2.09264	0.998629	-0.0489214
ENSSSCG00000028892	34	23	2.90023	1.94418	0.975539	-0.576976			ENSSSCG00000026520	46	48	1.59777	2.09005	0.998554	0.0497624
ENSSSCG00000011873	43	26	3.03239	1.9578	0.941233	-0.631227			ENSSSCG00000027376	14	22	1.35268	2.08756	0.997528	0.608736
ENSSSCG00000007084	48	45	2.09074	1.96596	0.988325	-0.0887227			ENSSSCG00000012084	117	134	1.86981	2.08732	0.997868	0.183704
ENSSSCG00000014256	116	96	2.21673	1.96601	0.978406	-0.17315			ENSSSCG00000003208	25	32	1.76127	2.07861	0.998161	0.33441
ENSSSCG00000027734	114	89	2.63802	1.96918	0.967946	-0.421835			ENSSSCG00000024888	15	23	1.33526	2.07769	0.997596	0.576778
ENSSSCG00000006121	18	13	2.51511	1.96947	0.988499	-0.352786			ENSSSCG00000013729	16	21	1.6111	2.07232	0.998491	0.363089
ENSSSCG00000012361	59	48	2.4179	1.96993	0.982228	-0.295632			ENSSSCG00000011581	5	9	1.26534	2.07148	0.998667	0.733905
ENSSSCG00000010461	40	21	3.48908	1.96994	0.882868	-0.824733			ENSSSCG00000008946	2	9	0.60709	2.06989	0.993912	1.7505
ENSSSCG00000009867	24	23	2.11201	1.97041	0.990561	-0.100121			ENSSSCG00000002889	0	8	0.241565	2.06981	0.956347	3.25082
ENSSSCG00000017829	97	53	3.74793	1.97324	0.423211	-0.925545			ENSSSCG00000017232	19	43	0.976598	2.0695	0.920013	1.12976
ENSSSCG00000015102	23	19	2.35105	1.97353	0.989376	-0.252579			ENSSSCG00000023842	24	30	1.44887	2.06817	0.998332	0.300774
ENSSSCG00000021238	216	119	3.70695	1.97549	0.0375999	-0.908034			ENSSSCG00000011949	11	19	1.13288	2.06743	0.997235	0.730095
ENSSSCG00000016823	35	29	2.1263	1.98154	0.986988	-0.101752			ENSSSCG00000001370	13	24	1.21591	2.06741	0.995029	0.829341
ENSSSCG00000029306	34	27	2.19818	1.98307	0.985775	-0.148565			ENSSSCG00000030679	6	17	0.778814	2.0652	0.988496	1.36108
ENSSSCG00000023445	36	29	2.31124	1.99256	0.985852	-0.21399			ENSSSCG00000001201	21	30	1.35941	2.0651	0.997523	0.485734
ENSSSCG00000024265	8	0	16.4865	1.99539	0.783537	-3.04654			ENSSSCG00000017624	16	31	1.12742	2.0645	0.989497	0.904909
ENSSSCG00000022586	7	17	0.755735	2.00072	0.952053	1.40462			ENSSSCG00000009023	4	15	0.651865	2.06165	0.980835	1.68163
ENSSSCG00000024439	29	42	1.31584	2.0018	0.971817	0.605358			ENSSSCG00000003740	21	31	1.2867	2.05942	0.99711	0.531627
ENSSSCG00000014216	32	23	2.51375	2.00212	0.981583	-0.328356			ENSSSCG00000010645	34	38	1.70219	2.05779	0.998526	0.146015
ENSSSCG00000028044	12	15	1.62151	2.006	0.991175	0.306993			ENSSSCG00000028090	9	18	1.14458	2.04487	0.995971	0.920538
ENSSSCG00000013715	57	36	2.7973	2.00641	0.928504	-0.479426			ENSSSCG00000029130	9	12	1.70766	2.04485	0.998883	0.370907
ENSSSCG00000015659	14	19	1.50103	2.0072	0.988483	0.41926			ENSSSCG00000006531	4	11	0.921629	2.04279	0.996232	1.26475
ENSSSCG00000025741	18	19	1.91306	2.00909	0.991302	0.0706371			ENSSSCG00000013994	99	138	1.50024	2.04111	0.986399	0.464784
ENSSSCG00000026403	18	27	1.46148	2.00988	0.979858	0.459674			ENSSSCG00000006161	13	9	1.62942	2.03938	0.998661	-0.497884
ENSSSCG00000001401	19	20	1.87719	2.01324	0.991139	0.100908			ENSSSCG00000021719	16	26	1.39249	2.03198	0.996607	0.659286
ENSSSCG00000000531	40	53	1.48087	2.01332	0.976994	0.443088			ENSSSCG00000025676	40	52	1.59126	2.03195	0.997309	0.360451
ENSSSCG00000000907	171	94	4.26189	2.0163	0.0864952	-1.07979			ENSSSCG00000016513	68	92	1.53963	2.02943	0.994139	0.420461
ENSSSCG00000029251	67	45	2.73319	2.0165	0.940933	-0.438738			ENSSSCG00000005946	13	18	1.59964	2.02795	0.998485	0.432299
ENSSSCG00000015647	55	56	1.9928	2.01904	0.988387	0.018844			ENSSSCG00000016334	30	33	1.97132	2.01976	0.998617	0.123192
ENSSSCG00000013313	65	42	2.83691	2.01932	0.924981	-0.49046			ENSSSCG00000009060	63	71	1.82446	2.01792	0.998224	0.159586
ENSSSCG00000015701	21	29	1.34583	2.02053	0.983449	0.586248			ENSSSCG00000008013	18	37	1.09083	2.01732	0.976027	0.992198
ENSSSCG00000026593	22	25	1.63715	2.02287	0.989841	0.305194			ENSSSCG00000027676	73	78	1.8276	2.01106	0.998411	0.0838901
ENSSSCG00000024920	55	38	2.88629	2.02298	0.961871	-0.512725			ENSSSCG00000024002	36	34	1.99594	2.00967	0.998611	-0.0906839
ENSSSCG00000004954	7	10	1.57162	2.02317	0.992072	0.364405			ENSSSCG00000000539	28	32	1.60905	2.00618	0.99856	0.176478
ENSSSCG00000015136	64	88	1.39571	2.02673	0.954955	0.538144			ENSSSCG00000015557	19	23	1.65822	2.00557	0.998626	0.253621
ENSSSCG00000022002	74	99	1.53626	2.02838	0.959425	0.400882			ENSSSCG00000015124	22	29	1.57385	2.00476	0.998128	0.37401
ENSSSCG00000030251	9	14	1.30541	2.03122	0.988395	0.63784			ENSSSCG00000016118	25	37	1.2202	2.00236	0.996435	0.538294
ENSSSCG00000013331	43	41	1.88156	2.03248	0.988781	0.111295			ENSSSCG00000023703	26	26	2.00031	2.12325	0.998754	-0.0102774
ENSSSCG00000025058	41	43	1.89386	2.03316	0.988781	0.102392			ENSSSCG00000017956	17	6	2.00048	0.683481	0.987577	-1.38038
ENSSSCG00000023849	3	8	0.769983	2.03452	0.985656	1.40174			ENSSSCG00000004629	18	11	2.00131	1.20257	0.997662	-0.675796
ENSSSCG00000025387	8	5	2.84457	2.03593	0.992443	-0.482559			ENSSSCG00000024412	27	33	2.00491	2.3102	0.998339	0.270372
ENSSSCG00000029507	29	32	1.74143	2.03645	0.989204	0.225844			ENSSSCG00000021078	45	46	2.0051	2.0107	0.998577	0.0206372
ENSSSCG00000010991	22	26	1.80804	2.03667	0.989126	0.171839			ENSSSCG00000016960	25	28	2.00524	2.47224	0.998661	0.147629
ENSSSCG00000002037	89	67	2.94438	2.03844	0.964751	-0.530536			ENSSSCG00000004670	11	8	2.00678	1.45613	0.998877	-0.427306
ENSSSCG00000002880	46	44	1.94323	2.03932	0.988636	0.0696396			ENSSSCG00000011489	47	47	2.00879	2.11107	0.998571	-0.0104394
ENSSSCG00000001050	16	29	1.07361	2.04013	0.953013	0.926183			ENSSSCG00000027285	10	12	2.00891	2.21463	0.998983	0.232508
ENSSSCG00000009152	58	55	1.97836	2.04084	0.988041	0.0448007			ENSSSCG00000011230	89	86	2.00924	1.96423	0.99844	-0.0594798
ENSSSCG00000020919	43	37	2.04242	2.04131	0.986937	-0.000777219			ENSSSCG00000002783	42	51	2.00933	2.45088	0.997984	0.264114
ENSSSCG00000028090	14	19	1.68567	2.04609	0.988483	0.279529			ENSSSCG00000001826	35	38	2.00955	2.1817	0.99858	0.105295
ENSSSCG00000017569	9	17	1.18373	2.04938	0.977308	0.791898			ENSSSCG00000024800	46	31	2.01024	1.54277	0.994764	-0.565902
ENSSSCG00000016832	27	36	1.43006	2.05048	0.982451	0.51986			ENSSSCG00000015197	10	7	2.01051	1.45571	0.998894	-0.472184
ENSSSCG00000030065	159	153	2.3844	2.05084	0.988524	-0.217439			ENSSSCG00000027447	20	24	2.01161	2.31383	0.998618	0.242039
ENSSSCG00000008456	65	46	2.99709	2.05168	0.960256	-0.546747			ENSSSCG00000001815	18	14	2.01183	1.75681	0.99863	-0.352396
ENSSSCG00000017551	24	27	2.04239	2.05458	0.989639	0.00859211			ENSSSCG00000012397	13	21	2.01191	2.29285	0.997447	0.644436
ENSSSCG00000029841	24	30	1.72765	2.05595	0.987002	0.250988			ENSSSCG00000028424	19	9	2.01205	1.06495	0.994273	-1.01456
ENSSSCG00000016338	92	94	2.07484	2.05673	0.987989	-0.0126409			ENSSSCG00000021546	34	22	2.01294	1.55996	0.995751	-0.617396
ENSSSCG00000007987	12	16	1.66484	2.05793	0.990041	0.305824			ENSSSCG00000006809	51	51	2.01369	1.98098	0.998551	-0.0104554
ENSSSCG00000012808	44	18	4.47895	2.05864	0.447947	-1.12151			ENSSSCG00000008902	40	32	2.01508	1.8681	0.997941	-0.324082
ENSSSCG00000020782	9	6	2.63122	2.06128	0.992261	-0.352166			ENSSSCG00000011867	26	35	2.01714	2.70212	0.997709	0.405576
ENSSSCG00000004279	38	43	1.88872	2.06573	0.987632	0.129237			ENSSSCG00000016792	67	55	2.01827	1.81028	0.99749	-0.290886
ENSSSCG00000003063	49	75	1.39699	2.06627	0.913786	0.564718			ENSSSCG00000013545	42	65	2.02157	2.9842	0.988934	0.608427
ENSSSCG00000029866	29	18	2.77866	2.06685	0.971513	-0.426941			ENSSSCG00000007026	22	31	2.02237	2.91026	0.997568	0.467302
ENSSSCG00000001680	79	83	2.05989	2.0684	0.987647	0.00594091			ENSSSCG00000011271	31	29	2.02291	1.95825	0.998657	-0.103628
ENSSSCG00000008081	14	13	2.43603	2.06842	0.992268	-0.235999			ENSSSCG00000008823	15	4	2.02295	0.512973	0.979307	-1.70028
ENSSSCG00000010316	168	122	2.67373	2.06863	0.914	-0.370183			ENSSSCG00000009807	30	34	2.02355	2.22366	0.998548	0.165086
ENSSSCG00000003338	23	15	3.36586	2.06904	0.981781	-0.702059			ENSSSCG00000029329	10	13	2.02375	2.46385	0.998865	0.339908
ENSSSCG00000016708	12	12	1.98962	2.07983	0.992753	0.0639664			ENSSSCG00000021862	35	43	2.02598	2.52248	0.998076	0.279581
ENSSSCG00000009236	55	38	2.67554	2.08356	0.961871	-0.36073			ENSSSCG00000029008	12	10	2.0261	1.7986	0.998969	-0.252121
ENSSSCG00000002427	92	92	1.80073	2.08574	0.988071	0.211974			ENSSSCG00000006491	27	30	2.02822	2.11418	0.998642	0.136855
ENSSSCG00000018009	25	19	2.43427	2.0865	0.986948	-0.222422			ENSSSCG00000010624	38	36	2.02829	1.87582	0.998596	-0.0864623
ENSSSCG00000012084	111	141	1.68193	2.08677	0.96634	0.3112			ENSSSCG00000016338	87	99	2.02956	2.25755	0.998031	0.174011
ENSSSCG00000008135	33	26	2.43148	2.08682	0.985731	-0.220554			ENSSSCG00000006947	57	67	2.03068	2.40139	0.997988	0.21923
ENSSSCG00000006335	8	27	0.568059	2.0898	0.480535	1.87915			ENSSSCG00000012960	8	8	2.03307	1.81459	0.999163	-0.00953241
ENSSSCG00000013244	44	45	2.14196	2.0905	0.98881	-0.0351104			ENSSSCG00000026530	12	12	2.03776	2.03426	0.999029	-0.00987715
ENSSSCG00000026499	32	40	1.56267	2.09103	0.9847	0.420152			ENSSSCG00000017401	63	85	2.03911	2.77574	0.994746	0.416125
ENSSSCG00000001888	12	30	0.91824	2.09127	0.767142	1.18752			ENSSSCG00000026754	73	56	2.04175	1.61456	0.996053	-0.38743
ENSSSCG00000010472	24	27	1.87242	2.09243	0.989639	0.16027			ENSSSCG00000014049	47	46	2.04236	1.87954	0.998562	-0.0408521
ENSSSCG00000007811	12	27	1.3049	2.0928	0.891864	0.681495			ENSSSCG00000008501	38	25	2.04257	1.39187	0.99543	-0.596483
ENSSSCG00000011853	32	51	1.29383	2.09384	0.937715	0.694509			ENSSSCG00000009612	32	36	2.04656	2.15878	0.998537	0.155003
ENSSSCG00000005450	27	26	2.07136	2.09413	0.990197	0.0157242			ENSSSCG00000007118	53	36	2.04709	1.43565	0.993883	-0.556646
ENSSSCG00000016792	56	60	1.79801	2.09544	0.987735	0.220833			ENSSSCG00000006370	5	8	2.04717	2.85113	0.998947	0.580919
ENSSSCG00000030018	45	30	3.03126	2.09569	0.963551	-0.532504			ENSSSCG00000006720	28	26	2.04728	1.97314	0.99869	-0.113621
ENSSSCG00000003757	32	21	2.73202	2.09646	0.974198	-0.381975			ENSSSCG00000003243	45	24	2.04852	1.19747	0.974878	-0.891744
ENSSSCG00000010390	10	12	1.84124	2.09679	0.99242	0.187543			ENSSSCG00000009945	51	53	2.04908	2.17331	0.998533	0.044055
ENSSSCG00000014310	34	29	2.40655	2.09737	0.987908	-0.198394			ENSSSCG00000009947	18	14	2.04969	1.62445	0.99863	-0.352396
ENSSSCG00000000682	26	33	1.70881	2.0989	0.985731	0.29665			ENSSSCG00000015774	131	131	2.05084	2.1637	0.998527	-0.0105717
ENSSSCG00000014600	5	9	1.12265	2.10084	0.990415	0.903966			ENSSSCG00000003143	27	39	2.0512	2.7413	0.996619	0.505226
ENSSSCG00000015839	9	10	1.75213	2.10165	0.993281	0.262472			ENSSSCG00000008140	22	19	2.05816	1.77486	0.998703	-0.212422
ENSSSCG00000000717	26	32	1.82639	2.10259	0.987	0.203172			ENSSSCG00000022976	69	80	2.05861	2.33943	0.997979	0.200233
ENSSSCG00000009090	191	165	2.12375	2.10437	0.982469	-0.013239			ENSSSCG00000027878	5	9	2.06205	3.17824	0.998667	0.733905
ENSSSCG00000005663	32	35	1.95628	2.10533	0.988987	0.105898			ENSSSCG00000001909	43	61	2.06329	2.78132	0.994833	0.484925
ENSSSCG00000004710	36	19	3.57879	2.1059	0.91	-0.765039			ENSSSCG00000012314	28	23	2.06497	1.79491	0.998426	-0.283954
ENSSSCG00000002900	19	23	1.8634	2.10601	0.989376	0.176568			ENSSSCG00000024961	22	27	2.0691	2.94772	0.998481	0.274264
ENSSSCG00000016740	29	33	2.07026	2.1066	0.98864	0.0250766			ENSSSCG00000028581	20	19	2.06946	2.18301	0.998839	-0.0807707
ENSSSCG00000023425	61	46	2.57742	2.10837	0.974218	-0.289768			ENSSSCG00000001822	26	29	2.07104	2.08856	0.998652	0.142052
ENSSSCG00000030566	45	49	1.95856	2.10923	0.987959	0.106873			ENSSSCG00000005575	45	26	2.07193	1.30466	0.986122	-0.780452
ENSSSCG00000030818	7	21	0.729655	2.10965	0.828193	1.53166			ENSSSCG00000026474	39	33	2.072	1.63746	0.998278	-0.245252
ENSSSCG00000014348	25	16	3.19461	2.11184	0.97881	-0.597162			ENSSSCG00000026625	22	39	2.07308	3.82131	0.98951	0.789781
ENSSSCG00000027557	90	57	2.9992	2.11285	0.847315	-0.505353			ENSSSCG00000004349	9	13	2.07336	3.17268	0.998698	0.478307
ENSSSCG00000002801	33	27	2.59799	2.11793	0.986997	-0.294767			ENSSSCG00000006864	26	21	2.07383	1.75406	0.998431	-0.306475
ENSSSCG00000025306	19	10	3.55772	2.11877	0.972616	-0.747697			ENSSSCG00000007351	32	26	2.07401	1.66985	0.998269	-0.300445
ENSSSCG00000010391	89	74	2.38416	2.12111	0.980744	-0.168693			ENSSSCG00000022061	35	28	2.07429	1.73792	0.9981	-0.322905
ENSSSCG00000024419	36	32	2.015	2.12324	0.988471	0.0754604			ENSSSCG00000016194	39	30	2.0774	1.79588	0.997674	-0.378769
ENSSSCG00000022601	56	44	2.40158	2.12446	0.98006	-0.176873			ENSSSCG00000023425	52	73	2.08123	3.12856	0.993991	0.471545
ENSSSCG00000027549	21	18	2.50988	2.12648	0.990305	-0.239149			ENSSSCG00000021494	29	34	2.08323	2.37312	0.99846	0.212497
ENSSSCG00000002932	23	28	1.5088	2.12665	0.988146	0.495215			ENSSSCG00000017148	95	115	2.08348	2.49586	0.997103	0.262633
ENSSSCG00000022361	17	10	3.22895	2.12912	0.982828	-0.600844			ENSSSCG00000002993	17	16	2.08405	1.90829	0.998898	-0.0928423
ENSSSCG00000029751	11	11	2.08531	2.12943	0.993013	0.030192			ENSSSCG00000022395	22	20	2.08777	1.87509	0.99877	-0.141822
ENSSSCG00000027635	17	9	3.71045	2.13081	0.977308	-0.800218			ENSSSCG00000022715	18	15	2.08779	1.80791	0.998759	-0.258919
ENSSSCG00000003371	61	46	3.19529	2.13216	0.974218	-0.583609			ENSSSCG00000016613	43	50	2.08865	2.67399	0.99825	0.202848
ENSSSCG00000008646	12	13	2.0507	2.13433	0.992497	0.0576465			ENSSSCG00000004215	35	32	2.08972	2.11367	0.998573	-0.136123
ENSSSCG00000003862	59	65	1.98512	2.13501	0.986927	0.105024			ENSSSCG00000012362	50	43	2.09082	1.44703	0.998171	-0.22372
ENSSSCG00000025047	67	85	1.79786	2.13549	0.974733	0.248261			ENSSSCG00000002280	5	9	2.09495	3.46668	0.998667	0.733905
ENSSSCG00000025538	21	17	2.48654	2.13572	0.989557	-0.219407			ENSSSCG00000022797	66	42	2.09517	1.42726	0.98493	-0.651056
ENSSSCG00000013258	26	18	2.98059	2.13729	0.982779	-0.479813			ENSSSCG00000009011	53	48	2.09674	1.84572	0.998368	-0.150807
ENSSSCG00000020912	60	38	2.90027	2.13826	0.923707	-0.439738			ENSSSCG00000025667	29	40	2.0976	2.6589	0.997179	0.441134
ENSSSCG00000028067	5	9	1.21822	2.13936	0.990415	0.812455			ENSSSCG00000021269	67	96	2.10055	2.79664	0.989357	0.502336
ENSSSCG00000001750	29	41	1.56323	2.14013	0.975366	0.453176			ENSSSCG00000024334	8	9	2.10115	2.36932	0.999124	0.143454
ENSSSCG00000011862	16	29	1.04873	2.14117	0.953013	1.02982			ENSSSCG00000011023	45	62	2.10229	2.78236	0.995657	0.443804
ENSSSCG00000007531	17	24	1.60825	2.14239	0.984952	0.413691			ENSSSCG00000028883	25	40	2.10404	3.48121	0.994052	0.648088
ENSSSCG00000030683	18	17	1.97506	2.1435	0.991475	0.118043			ENSSSCG00000025537	45	49	2.10887	2.30273	0.998482	0.110017
ENSSSCG00000006151	39	27	2.56927	2.14685	0.974282	-0.25912			ENSSSCG00000021585	28	28	2.11068	2.02045	0.998729	-0.010303
ENSSSCG00000003595	8	12	1.58966	2.14708	0.990386	0.433635			ENSSSCG00000000811	20	31	2.11311	3.1211	0.996475	0.598954
ENSSSCG00000027992	74	87	1.88797	2.14903	0.982807	0.186807			ENSSSCG00000022536	106	109	2.11363	2.23815	0.998484	0.0293611
ENSSSCG00000009055	16	8	3.37852	2.14925	0.975812	-0.652516			ENSSSCG00000004366	22	18	2.11374	1.7381	0.998596	-0.286654
ENSSSCG00000024274	22	25	1.71725	2.14926	0.989841	0.323725			ENSSSCG00000010665	60	76	2.11597	3.0179	0.996924	0.325865
ENSSSCG00000000811	32	23	3.15666	2.1503	0.981583	-0.553879			ENSSSCG00000002801	25	34	2.11975	2.72379	0.997679	0.419451
ENSSSCG00000012155	38	34	2.17517	2.15081	0.988371	-0.0162747			ENSSSCG00000005233	45	51	2.12403	2.53085	0.998348	0.166668
ENSSSCG00000015733	139	131	2.45008	2.15311	0.987715	-0.186425			ENSSSCG00000021715	23	31	2.12541	2.6777	0.997904	0.405724
ENSSSCG00000007093	35	52	1.46483	2.15733	0.958454	0.558523			ENSSSCG00000022676	12	16	2.12619	2.9911	0.998683	0.378744
ENSSSCG00000018015	38	55	1.53513	2.15835	0.961871	0.49163			ENSSSCG00000026087	19	14	2.12835	1.82216	0.998435	-0.426655
ENSSSCG00000016950	67	50	2.59803	2.15953	0.970506	-0.266704			ENSSSCG00000000090	13	15	2.13007	2.22176	0.998913	0.183501
ENSSSCG00000014045	7	10	1.39209	2.16157	0.992072	0.634837			ENSSSCG00000004059	18	40	2.13049	4.45742	0.946614	1.10199
ENSSSCG00000007659	48	41	2.33792	2.16261	0.986131	-0.112446			ENSSSCG00000024899	87	109	2.13177	2.68944	0.996381	0.311594
ENSSSCG00000012034	27	48	1.14093	2.16302	0.886539	0.922861			ENSSSCG00000000029	147	166	2.13224	2.26925	0.998006	0.163739
ENSSSCG00000026581	55	50	2.1747	2.16394	0.987418	-0.00718257			ENSSSCG00000028662	28	41	2.13344	2.83642	0.996175	0.524973
ENSSSCG00000026443	26	33	1.73772	2.16422	0.985731	0.316655			ENSSSCG00000011729	36	74	2.13354	4.35548	0.728032	1.01019
ENSSSCG00000008892	26	22	2.23816	2.16458	0.989126	-0.0482385			ENSSSCG00000021502	15	29	2.13476	4.26913	0.991077	0.89944
ENSSSCG00000004799	42	24	3.2689	2.16502	0.921522	-0.594438			ENSSSCG00000022394	32	48	2.13558	3.30466	0.994631	0.560842
ENSSSCG00000003113	10	16	1.53183	2.1652	0.98606	0.499272			ENSSSCG00000016086	18	19	2.13643	2.32193	0.998866	0.0641115
ENSSSCG00000009037	83	69	2.60133	2.16545	0.981213	-0.264533			ENSSSCG00000024121	9	9	2.14023	1.94832	0.999126	-0.00964462
ENSSSCG00000017832	16	25	1.26292	2.16569	0.97881	0.778093			ENSSSCG00000021843	29	25	2.1448	1.73753	0.998541	-0.217217
ENSSSCG00000030359	19	38	0.970962	2.16647	0.862059	1.15782			ENSSSCG00000015070	17	10	2.14635	1.2078	0.997576	-0.723707
ENSSSCG00000002898	42	62	1.4995	2.16696	0.949878	0.531218			ENSSSCG00000017188	18	16	2.14861	1.80373	0.998837	-0.171132
ENSSSCG00000024542	9	5	3.59757	2.1687	0.990415	-0.730204			ENSSSCG00000021273	93	63	2.14885	1.51586	0.983655	-0.565569
ENSSSCG00000011422	37	36	2.23069	2.16901	0.98929	-0.0404664			ENSSSCG00000015649	11	11	2.15225	2.19212	0.999059	-0.00981262
ENSSSCG00000015410	24	18	2.58671	2.16964	0.98692	-0.253684			ENSSSCG00000013882	36	31	2.15231	1.76647	0.998403	-0.220203
ENSSSCG00000023853	44	32	2.79444	2.16966	0.976702	-0.365043			ENSSSCG00000010644	41	20	2.15366	1.1866	0.963085	-1.01251
ENSSSCG00000015649	2	10	0.4086	2.17005	0.935772	2.409			ENSSSCG00000001624	45	73	2.15735	3.09377	0.978187	0.676185
ENSSSCG00000021888	70	52	2.81663	2.17069	0.968528	-0.375794			ENSSSCG00000003626	19	20	2.16062	2.44056	0.998847	0.0604517
ENSSSCG00000030007	29	15	4.21311	2.17259	0.93686	-0.95546			ENSSSCG00000030424	45	42	2.16311	1.90397	0.998512	-0.107861
ENSSSCG00000007135	114	85	2.87811	2.17318	0.953359	-0.405296			ENSSSCG00000024131	27	19	2.16581	1.79189	0.997664	-0.496977
ENSSSCG00000024210	9	3	5.79653	2.17428	0.978986	-1.41463			ENSSSCG00000003990	25	26	2.16811	2.34426	0.998754	0.0443101
ENSSSCG00000029880	27	27	2.21827	2.17471	0.990218	-0.0286381			ENSSSCG00000026961	18	10	2.16854	1.38025	0.996924	-0.801997
ENSSSCG00000014994	29	15	4.33305	2.17573	0.93686	-0.99392			ENSSSCG00000009157	109	119	2.17105	2.54995	0.998289	0.115041
ENSSSCG00000007548	5	10	1.10415	2.17729	0.987437	0.979539			ENSSSCG00000027264	22	43	2.17122	4.64681	0.973725	0.927485
ENSSSCG00000027825	2	8	0.487616	2.17737	0.974436	2.15884			ENSSSCG00000020912	50	42	2.1717	2.10121	0.998029	-0.256933
ENSSSCG00000001634	30	31	2.39007	2.1793	0.989784	-0.133206			ENSSSCG00000001202	20	13	2.17234	1.58055	0.997788	-0.597234
ENSSSCG00000015817	11	14	1.77192	2.18627	0.991343	0.303194			ENSSSCG00000025387	6	8	2.17347	2.77254	0.999099	0.356171
ENSSSCG00000030921	39	23	3.74664	2.18692	0.942844	-0.776695			ENSSSCG00000012305	23	20	2.17499	1.93137	0.99869	-0.203401
ENSSSCG00000010640	66	71	1.98913	2.18698	0.987346	0.136837			ENSSSCG00000012112	58	92	2.17581	3.81304	0.970122	0.646583
ENSSSCG00000011714	11	15	1.52477	2.18713	0.990137	0.520399			ENSSSCG00000024113	61	53	2.17587	2.12728	0.998092	-0.210005
ENSSSCG00000021946	37	20	3.46768	2.19078	0.916382	-0.662521			ENSSSCG00000028274	112	92	2.17696	1.74454	0.996676	-0.291747
ENSSSCG00000014287	81	74	2.63656	2.19186	0.986675	-0.266497			ENSSSCG00000029929	15	22	2.17822	3.23904	0.997976	0.515217
ENSSSCG00000007774	12	10	2.88679	2.19321	0.99242	-0.396434			ENSSSCG00000030626	42	45	2.17962	2.32483	0.998541	0.0870155
ENSSSCG00000021899	184	95	4.11209	2.19359	0.0171998	-0.906575			ENSSSCG00000023944	16	27	2.1814	3.72319	0.995838	0.71187
ENSSSCG00000022099	107	59	4.03901	2.19881	0.371196	-0.877282			ENSSSCG00000023853	36	45	2.18255	2.89802	0.997911	0.304197
ENSSSCG00000027741	33	27	2.42923	2.2016	0.986997	-0.141929			ENSSSCG00000016141	26	27	2.18309	2.24529	0.998741	0.0423065
ENSSSCG00000010003	52	66	1.7978	2.20325	0.97822	0.293433			ENSSSCG00000017380	23	35	2.18343	3.12048	0.996211	0.575955
ENSSSCG00000029424	40	53	1.69095	2.20355	0.976994	0.381986			ENSSSCG00000022000	54	58	2.18616	2.33424	0.99846	0.0909259
ENSSSCG00000023216	23	23	2.05696	2.20748	0.990715	0.101872			ENSSSCG00000023548	50	33	2.18778	1.62312	0.993228	-0.596277
ENSSSCG00000016099	13	9	2.94811	2.21046	0.990314	-0.415413			ENSSSCG00000020723	4	8	2.18889	3.99056	0.998629	0.847256
ENSSSCG00000009243	41	27	3.00171	2.21058	0.965519	-0.441342			ENSSSCG00000001847	21	31	2.18961	2.90236	0.99711	0.531627
ENSSSCG00000016123	45	31	2.99878	2.21301	0.969238	-0.438382			ENSSSCG00000014242	99	102	2.19039	2.26679	0.998476	0.0321224
ENSSSCG00000011593	41	36	2.41265	2.215	0.987684	-0.123342			ENSSSCG00000021937	8	14	2.19631	3.91054	0.998017	0.731361
ENSSSCG00000017381	164	110	3.37438	2.215	0.786122	-0.607324			ENSSSCG00000024400	37	38	2.19749	2.39359	0.99863	0.0271495
ENSSSCG00000003000	98	98	2.32847	2.21515	0.988102	-0.0719639			ENSSSCG00000000907	98	101	2.1977	2.58023	0.998475	0.0325483
ENSSSCG00000026522	23	15	3.30905	2.21616	0.981781	-0.578351			ENSSSCG00000009395	28	28	2.1978	2.47166	0.998729	-0.010303
ENSSSCG00000027970	23	25	2.25202	2.21906	0.990237	-0.0212321			ENSSSCG00000012585	128	117	2.19792	2.20978	0.998175	-0.139218
ENSSSCG00000006872	66	66	2.0712	2.22706	0.988194	0.104699			ENSSSCG00000004829	52	33	2.19876	1.46288	0.990462	-0.651845
ENSSSCG00000010597	25	17	2.93663	2.22772	0.982492	-0.398592			ENSSSCG00000020987	17	15	2.20073	2.04082	0.998856	-0.180629
ENSSSCG00000006023	32	30	1.98812	2.22989	0.989527	0.165589			ENSSSCG00000004807	12	11	2.20438	2.12529	0.999021	-0.125921
ENSSSCG00000004829	23	50	1.00116	2.23196	0.567578	1.15661			ENSSSCG00000025067	62	73	2.20563	2.58997	0.997911	0.221892
ENSSSCG00000011632	39	36	2.22425	2.23343	0.988739	0.00589028			ENSSSCG00000004657	91	78	2.20764	2.08479	0.997676	-0.230477
ENSSSCG00000011581	4	9	0.953872	2.23351	0.986773	1.2274			ENSSSCG00000004710	23	19	2.20883	1.94765	0.998588	-0.274
ENSSSCG00000004331	74	75	1.90635	2.2351	0.988068	0.229489			ENSSSCG00000022319	14	25	2.21021	3.49664	0.995346	0.786056
ENSSSCG00000001804	33	38	1.90531	2.23523	0.987772	0.230386			ENSSSCG00000004196	58	52	2.211	2.23333	0.998288	-0.16537
ENSSSCG00000016336	35	30	2.64676	2.23562	0.987872	-0.243587			ENSSSCG00000011747	28	51	2.21281	4.04284	0.97532	0.833499
ENSSSCG00000010984	63	89	1.55192	2.23639	0.943514	0.527143			ENSSSCG00000010871	22	26	2.21287	2.91743	0.998602	0.22168
ENSSSCG00000030023	3	9	0.742307	2.23729	0.978986	1.59168			ENSSSCG00000003287	14	19	2.21291	2.71893	0.998488	0.406528
ENSSSCG00000016841	88	26	7.22298	2.23927	8.23116e-05	-1.68955			ENSSSCG00000009972	24	49	2.21447	4.32296	0.943625	0.991514
ENSSSCG00000010882	11	13	1.86206	2.24023	0.992193	0.266697			ENSSSCG00000013758	111	116	2.21921	2.19862	0.998461	0.0524851
ENSSSCG00000011030	100	103	2.07978	2.24329	0.987955	0.109178			ENSSSCG00000023108	30	23	2.22064	1.72551	0.99805	-0.380388
ENSSSCG00000027341	149	139	2.3256	2.24416	0.987505	-0.0514017			ENSSSCG00000030435	24	24	2.2208	2.20543	0.998783	-0.0102477
ENSSSCG00000022832	22	25	1.85124	2.24443	0.989841	0.277869			ENSSSCG00000011857	31	37	2.22161	2.83751	0.998343	0.238027
ENSSSCG00000008066	38	25	2.94689	2.24522	0.968537	-0.392354			ENSSSCG00000010640	73	58	2.22443	1.79083	0.996838	-0.337625
ENSSSCG00000024954	22	58	0.816275	2.24669	0.08252	1.46064			ENSSSCG00000017758	73	54	2.22537	1.68237	0.994902	-0.439017
ENSSSCG00000021977	39	45	1.80586	2.24722	0.986926	0.315411			ENSSSCG00000030566	50	45	2.22551	1.97753	0.998372	-0.159503
ENSSSCG00000008199	24	23	2.32169	2.24843	0.990561	-0.0462828			ENSSSCG00000000519	31	25	2.22854	1.99293	0.998266	-0.310531
ENSSSCG00000022236	23	25	2.18539	2.24906	0.990237	0.0414504			ENSSSCG00000015979	36	38	2.23016	2.36569	0.998614	0.0656933
ENSSSCG00000017337	24	27	2.04776	2.24956	0.989639	0.135594			ENSSSCG00000011353	34	43	2.23051	2.81542	0.997881	0.320301
ENSSSCG00000017546	36	30	2.51081	2.25344	0.986982	-0.156044			ENSSSCG00000006262	34	33	2.23228	2.12554	0.998656	-0.0522563
ENSSSCG00000015238	101	145	1.52808	2.25405	0.88192	0.560813			ENSSSCG00000023994	33	45	2.235	3.06744	0.997016	0.426421
ENSSSCG00000017262	32	56	1.23189	2.25443	0.859269	0.871858			ENSSSCG00000002557	11	22	2.2351	3.99391	0.994172	0.932304
ENSSSCG00000002828	65	40	3.3235	2.25506	0.891399	-0.559512			ENSSSCG00000014999	42	36	2.23892	2.31337	0.99828	-0.227559
ENSSSCG00000016175	6	17	0.857122	2.25551	0.922286	1.39591			ENSSSCG00000026733	29	43	2.24095	3.17111	0.995669	0.54316
ENSSSCG00000001578	24	27	1.84273	2.25567	0.989639	0.291754			ENSSSCG00000015036	76	70	2.24321	2.23564	0.998306	-0.127654
ENSSSCG00000027571	10	15	1.35275	2.25613	0.988459	0.737882			ENSSSCG00000026887	8	11	2.2437	2.98526	0.9989	0.407961
ENSSSCG00000028631	29	24	2.90193	2.25613	0.988104	-0.363167			ENSSSCG00000016074	52	55	2.24804	2.51969	0.998502	0.0690644
ENSSSCG00000023608	24	34	1.59469	2.2573	0.979263	0.501313			ENSSSCG00000009730	38	22	2.24841	1.39442	0.990575	-0.773803
ENSSSCG00000030458	12	27	1.12206	2.25799	0.891864	1.00884			ENSSSCG00000011355	229	223	2.24934	2.08076	0.99868	-0.0487493
ENSSSCG00000023698	13	8	3.32783	2.26027	0.988288	-0.558054			ENSSSCG00000016689	44	45	2.24965	2.10726	0.998583	0.0213258
ENSSSCG00000007978	7	9	1.90239	2.26055	0.993192	0.248885			ENSSSCG00000000086	14	19	2.25158	2.76606	0.998488	0.406528
ENSSSCG00000029102	84	67	2.90659	2.26636	0.976571	-0.35893			ENSSSCG00000029895	17	20	2.25199	2.38383	0.998756	0.213
ENSSSCG00000002511	72	61	2.89702	2.26716	0.983521	-0.353648			ENSSSCG00000009584	71	60	2.25648	2.87518	0.997745	-0.249917
ENSSSCG00000007991	73	135	1.36317	2.26737	0.151314	0.734042			ENSSSCG00000004662	16	13	2.25685	2.05786	0.99879	-0.291279
ENSSSCG00000014581	48	55	2.15033	2.26826	0.986243	0.0770735			ENSSSCG00000021579	116	97	2.25811	2.04121	0.997029	-0.266363
ENSSSCG00000005981	58	39	3.41794	2.2705	0.951798	-0.5901			ENSSSCG00000021638	106	90	2.2608	1.93874	0.997409	-0.244371
ENSSSCG00000022585	12	18	1.45279	2.27057	0.986455	0.644237			ENSSSCG00000012361	58	53	2.26183	2.10156	0.998363	-0.138372
ENSSSCG00000030358	60	56	2.51252	2.27279	0.987735	-0.144653			ENSSSCG00000000573	35	53	2.26252	3.44272	0.993387	0.575408
ENSSSCG00000002263	64	69	2.22766	2.27492	0.987344	0.0302482			ENSSSCG00000030083	8	9	2.26327	2.48038	0.999124	0.143454
ENSSSCG00000016986	37	27	2.80606	2.27541	0.980234	-0.302446			ENSSSCG00000010039	26	20	2.26556	1.82484	0.998245	-0.37378
ENSSSCG00000005837	43	27	3.96191	2.27982	0.952581	-0.797285			ENSSSCG00000013396	22	30	2.26616	3.19488	0.997879	0.42141
ENSSSCG00000000475	16	24	1.24647	2.27997	0.982163	0.871151			ENSSSCG00000010011	37	32	2.268	1.9186	0.9984	-0.214269
ENSSSCG00000025418	8	7	2.30085	2.28086	0.993906	-0.0125951			ENSSSCG00000013332	34	21	2.26944	1.6125	0.994655	-0.681701
ENSSSCG00000004617	39	32	2.35943	2.28342	0.985943	-0.0472364			ENSSSCG00000014251	23	21	2.26952	2.03178	0.998755	-0.136096
ENSSSCG00000020882	36	36	2.15984	2.28532	0.989387	0.0814858			ENSSSCG00000003472	50	57	2.27257	2.42565	0.998268	0.175312
ENSSSCG00000012375	91	93	2.22437	2.28829	0.987984	0.04086			ENSSSCG00000010184	21	33	2.27432	3.33312	0.995933	0.619252
ENSSSCG00000013093	57	72	1.96079	2.28909	0.977613	0.223338			ENSSSCG00000025058	50	42	2.27444	1.96523	0.998029	-0.256933
ENSSSCG00000004720	64	100	1.39747	2.29059	0.834182	0.712877			ENSSSCG00000027565	90	94	2.27491	2.28351	0.998451	0.051564
ENSSSCG00000028637	35	39	2.10089	2.29127	0.988323	0.125159			ENSSSCG00000026075	16	14	2.27709	1.73174	0.998876	-0.191323
ENSSSCG00000005325	35	65	1.26556	2.29403	0.7007	0.858044			ENSSSCG00000021019	22	31	2.27744	3.53262	0.997568	0.467302
ENSSSCG00000001983	11	14	1.89302	2.29499	0.991343	0.27782			ENSSSCG00000015902	16	10	2.27839	1.56217	0.998053	-0.640924
ENSSSCG00000012170	13	36	0.82453	2.29705	0.4395	1.47822			ENSSSCG00000013584	23	25	2.27941	2.12857	0.998744	0.105529
ENSSSCG00000014112	49	26	3.9599	2.29731	0.825462	-0.785525			ENSSSCG00000028192	17	27	2.28249	4.0552	0.996736	0.629087
ENSSSCG00000021273	144	93	3.3502	2.29751	0.72842	-0.544182			ENSSSCG00000016708	15	24	2.28468	3.84172	0.997102	0.635818
ENSSSCG00000008388	16	28	1.16853	2.2986	0.96202	0.976098			ENSSSCG00000028711	19	25	2.2865	3.26279	0.998309	0.369381
ENSSSCG00000010068	38	27	3.32352	2.29939	0.977544	-0.531446			ENSSSCG00000000417	35	28	2.28659	1.84655	0.9981	-0.322905
ENSSSCG00000021020	12	14	1.92218	2.30041	0.991978	0.259126			ENSSSCG00000013895	47	47	2.28702	2.18264	0.998571	-0.0104394
ENSSSCG00000021879	11	8	3.20463	2.30112	0.991883	-0.477821			ENSSSCG00000017697	18	19	2.28744	2.65746	0.998866	0.0641115
ENSSSCG00000000449	38	44	2.11133	2.30119	0.986931	0.124255			ENSSSCG00000022493	59	58	2.29147	2.38881	0.998514	-0.0347534
ENSSSCG00000021082	4	13	0.788321	2.30381	0.943954	1.5472			ENSSSCG00000026915	19	32	2.29308	4.24619	0.994599	0.714054
ENSSSCG00000009465	61	43	2.9498	2.30575	0.962007	-0.35535			ENSSSCG00000005399	76	60	2.29323	1.95969	0.996614	-0.346867
ENSSSCG00000002933	22	19	2.34325	2.3058	0.990181	-0.0232743			ENSSSCG00000015253	49	38	2.29525	1.84829	0.997331	-0.369398
ENSSSCG00000008075	60	55	2.53301	2.30833	0.987373	-0.134016			ENSSSCG00000012975	27	24	2.29543	1.95226	0.998644	-0.174167
ENSSSCG00000029268	25	26	1.98062	2.31038	0.990312	0.222205			ENSSSCG00000022703	11	9	2.29899	1.82043	0.998996	-0.27432
ENSSSCG00000025134	88	67	2.73372	2.31133	0.967708	-0.24215			ENSSSCG00000001800	25	25	2.30129	2.17578	0.998768	-0.0102632
ENSSSCG00000010941	35	32	2.14902	2.31426	0.988987	0.10691			ENSSSCG00000024596	45	30	2.30221	1.50686	0.994591	-0.580722
ENSSSCG00000022728	17	17	2.43345	2.31573	0.991673	-0.0715844			ENSSSCG00000004289	90	90	2.30247	2.64797	0.998484	-0.0105377
ENSSSCG00000021283	98	130	1.87466	2.32005	0.953013	0.307527			ENSSSCG00000002551	22	46	2.30301	4.49565	0.944985	1.02277
ENSSSCG00000006321	38	35	2.65342	2.32008	0.988797	-0.193655			ENSSSCG00000012693	13	5	2.30496	0.945866	0.995102	-1.24076
ENSSSCG00000010023	24	35	1.66829	2.32113	0.976113	0.47643			ENSSSCG00000015697	32	31	2.30679	2.45528	0.998675	-0.0548223
ENSSSCG00000009002	27	34	1.72965	2.3217	0.985775	0.42466			ENSSSCG00000024361	45	46	2.30825	2.52388	0.998577	0.0206372
ENSSSCG00000029206	42	35	2.7065	2.32181	0.986016	-0.221185			ENSSSCG00000017356	46	85	2.3107	3.75611	0.85564	0.86209
ENSSSCG00000029783	24	13	4.15232	2.32222	0.963581	-0.838418			ENSSSCG00000008402	23	15	2.31072	1.71571	0.99746	-0.597031
ENSSSCG00000025121	13	14	2.21892	2.32377	0.992268	0.0666413			ENSSSCG00000010503	59	44	2.31111	2.0305	0.996149	-0.426007
ENSSSCG00000005235	48	56	1.88419	2.32405	0.985463	0.30272			ENSSSCG00000000953	34	52	2.31233	3.53236	0.993135	0.58913
ENSSSCG00000011721	19	32	1.36377	2.32595	0.960244	0.770219			ENSSSCG00000017508	56	74	2.31348	2.88021	0.996063	0.385827
ENSSSCG00000002930	32	12	5.10209	2.32631	0.632684	-1.13305			ENSSSCG00000016568	38	50	2.31352	3.11451	0.997237	0.377163
ENSSSCG00000024702	9	0	21.4266	2.32654	0.64985	-3.20317			ENSSSCG00000006121	17	26	2.31563	3.73411	0.997281	0.576503
ENSSSCG00000017415	63	38	3.61758	2.32694	0.880545	-0.636624			ENSSSCG00000001401	23	28	2.31657	2.79126	0.998478	0.26342
ENSSSCG00000009351	27	19	3.35971	2.32892	0.983031	-0.528684			ENSSSCG00000005894	100	128	2.31682	2.74548	0.995139	0.342656
ENSSSCG00000017311	142	132	2.5834	2.32925	0.98729	-0.149375			ENSSSCG00000021774	22	27	2.31733	3.27302	0.998481	0.274264
ENSSSCG00000012828	32	55	1.36534	2.33172	0.880748	0.772164			ENSSSCG00000017962	113	113	2.31894	2.10651	0.998501	-0.0105598
ENSSSCG00000029138	25	13	3.90642	2.33254	0.953952	-0.743963			ENSSSCG00000011115	12	9	2.31963	1.75748	0.998859	-0.390428
ENSSSCG00000027701	90	52	3.75767	2.33306	0.658353	-0.687602			ENSSSCG00000005930	59	59	2.32108	2.14073	0.998522	-0.010481
ENSSSCG00000000742	50	64	1.83605	2.33467	0.977728	0.346593			ENSSSCG00000029181	6	10	2.32163	3.23868	0.998687	0.647465
ENSSSCG00000024261	74	88	2.08127	2.33689	0.981835	0.167111			ENSSSCG00000022223	10	9	2.32213	2.36072	0.999083	-0.148044
ENSSSCG00000009426	32	32	2.15439	2.33891	0.989715	0.118544			ENSSSCG00000015598	51	54	2.32279	2.44803	0.998505	0.0705569
ENSSSCG00000024899	74	97	1.80482	2.33973	0.965781	0.374485			ENSSSCG00000010031	85	69	2.32434	1.83343	0.996931	-0.307747
ENSSSCG00000030303	38	49	1.94632	2.34037	0.98068	0.266021			ENSSSCG00000015850	90	86	2.32481	2.26862	0.998412	-0.0754333
ENSSSCG00000008200	19	20	2.2748	2.34323	0.991139	0.0427404			ENSSSCG00000005358	21	38	2.32766	4.11735	0.988738	0.817523
ENSSSCG00000025858	19	32	1.42276	2.34382	0.960244	0.720117			ENSSSCG00000023445	37	46	2.3289	3.02925	0.997925	0.29672
ENSSSCG00000016308	32	21	3.27538	2.34387	0.974198	-0.48276			ENSSSCG00000029288	23	26	2.32916	2.67014	0.998682	0.160102
ENSSSCG00000023253	96	60	3.21439	2.34645	0.806645	-0.454039			ENSSSCG00000029050	13	9	2.33232	1.61171	0.998661	-0.497884
ENSSSCG00000021257	26	42	1.57609	2.34889	0.950521	0.575626			ENSSSCG00000030649	32	44	2.33232	3.32716	0.996962	0.437826
ENSSSCG00000005198	74	54	3.05672	2.34974	0.962878	-0.379498			ENSSSCG00000010325	37	32	2.33264	2.12019	0.9984	-0.214269
ENSSSCG00000015450	46	44	2.56609	2.35431	0.988636	-0.124279			ENSSSCG00000004165	45	31	2.33292	1.7087	0.995523	-0.53483
ENSSSCG00000024869	19	19	2.33463	2.35457	0.99132	0.0123066			ENSSSCG00000015660	27	52	2.33553	4.6291	0.958182	0.911758
ENSSSCG00000017868	37	40	2.21752	2.35668	0.988684	0.087834			ENSSSCG00000016230	40	52	2.33604	3.18439	0.997309	0.360451
ENSSSCG00000007932	13	30	1.1149	2.35697	0.839834	1.08004			ENSSSCG00000003619	23	42	2.33642	4.13827	0.984852	0.832693
ENSSSCG00000017545	16	13	2.75527	2.35752	0.991014	-0.224952			ENSSSCG00000027056	41	31	2.33759	1.91782	0.997413	-0.403382
ENSSSCG00000022312	25	44	1.29705	2.35814	0.910959	0.862335			ENSSSCG00000004344	38	35	2.33784	2.45054	0.998552	-0.126057
ENSSSCG00000023680	90	122	1.81693	2.35907	0.945553	0.376758			ENSSSCG00000014386	45	44	2.33913	2.33567	0.998574	-0.0421818
ENSSSCG00000029345	53	46	2.73799	2.35998	0.986212	-0.214336			ENSSSCG00000022815	47	63	2.34037	3.09342	0.996282	0.405056
ENSSSCG00000008792	70	82	1.69413	2.3606	0.983349	0.478635			ENSSSCG00000012156	50	53	2.3404	2.62674	0.998509	0.0721064
ENSSSCG00000024663	36	32	2.33301	2.36583	0.988471	0.0201418			ENSSSCG00000009837	16	8	2.34364	1.23293	0.99649	-0.932217
ENSSSCG00000006799	59	39	2.99845	2.367	0.944763	-0.341181			ENSSSCG00000008547	14	9	2.34786	1.6047	0.998384	-0.597888
ENSSSCG00000002786	63	55	2.78474	2.36973	0.985691	-0.232817			ENSSSCG00000010941	42	33	2.34841	2.10801	0.997735	-0.349759
ENSSSCG00000003604	87	117	1.90457	2.3725	0.951168	0.31692			ENSSSCG00000023776	68	42	2.34972	1.52211	0.978723	-0.693534
ENSSSCG00000003982	40	35	2.51589	2.37299	0.987712	-0.0843625			ENSSSCG00000021400	14	22	2.35077	3.53155	0.997528	0.608736
ENSSSCG00000011254	55	27	4.56471	2.37706	0.624965	-0.941317			ENSSSCG00000013932	67	93	2.35185	3.27661	0.992535	0.456983
ENSSSCG00000000433	28	35	1.99862	2.3772	0.985815	0.250274			ENSSSCG00000003862	67	81	2.35203	2.7368	0.997539	0.259809
ENSSSCG00000028144	17	21	1.99846	2.37937	0.989557	0.25168			ENSSSCG00000016378	89	75	2.35289	1.86236	0.997478	-0.254642
ENSSSCG00000029448	59	34	3.6832	2.37968	0.852411	-0.63018			ENSSSCG00000003338	15	6	2.35295	0.871559	0.993995	-1.20978
ENSSSCG00000023166	49	45	2.60657	2.38094	0.987959	-0.130662			ENSSSCG00000022818	28	32	2.35527	2.67769	0.99856	0.176478
ENSSSCG00000014958	76	46	4.22953	2.38149	0.833417	-0.828617			ENSSSCG00000009729	79	70	2.35698	2.35763	0.998074	-0.182843
ENSSSCG00000024206	82	77	2.39559	2.38335	0.987395	-0.00736594			ENSSSCG00000025186	52	70	2.36321	3.1362	0.995771	0.411789
ENSSSCG00000026817	134	156	2.21202	2.38387	0.981865	0.107972			ENSSSCG00000006165	65	79	2.36721	2.91592	0.997501	0.267271
ENSSSCG00000017053	14	23	1.56035	2.38492	0.977412	0.612013			ENSSSCG00000026499	49	44	2.36758	2.22974	0.998373	-0.162646
ENSSSCG00000011119	149	109	3.44343	2.38655	0.929031	-0.528877			ENSSSCG00000007324	145	193	2.36981	2.89853	0.98873	0.399658
ENSSSCG00000020663	108	82	3.12953	2.38767	0.961579	-0.390311			ENSSSCG00000000936	29	22	2.37001	2.01084	0.998037	-0.394537
ENSSSCG00000017886	19	22	2.05002	2.38798	0.990181	0.220179			ENSSSCG00000030108	124	142	2.37037	2.8159	0.997855	0.183608
ENSSSCG00000007678	12	27	1.28238	2.38948	0.891864	0.897862			ENSSSCG00000029170	25	15	2.37056	1.56936	0.996205	-0.712822
ENSSSCG00000028488	17	20	2.13426	2.38996	0.990435	0.163248			ENSSSCG00000013331	60	38	2.37066	1.7103	0.98714	-0.656633
ENSSSCG00000025140	98	68	2.9475	2.39215	0.924706	-0.301154			ENSSSCG00000021606	56	94	2.37101	3.91204	0.937359	0.727111
ENSSSCG00000000713	13	27	1.21978	2.39425	0.92479	0.972959			ENSSSCG00000026898	49	48	2.37462	2.61621	0.998552	-0.03963
ENSSSCG00000007801	56	64	2.19689	2.39686	0.985721	0.125701			ENSSSCG00000028470	69	54	2.37744	2.15362	0.996683	-0.358771
ENSSSCG00000028521	9	14	1.60969	2.39866	0.988395	0.575461			ENSSSCG00000005663	37	55	2.3788	3.42416	0.993833	0.549787
ENSSSCG00000001469	24	22	2.65252	2.39868	0.990359	-0.1451			ENSSSCG00000008852	30	26	2.37895	2.24704	0.998534	-0.210055
ENSSSCG00000009120	24	27	1.79477	2.40054	0.989639	0.419512			ENSSSCG00000022730	14	14	2.38079	2.30737	0.998975	-0.00998027
ENSSSCG00000017624	43	38	2.85539	2.4057	0.987632	-0.247236			ENSSSCG00000021149	42	47	2.3819	3.10028	0.998428	0.148496
ENSSSCG00000008259	23	36	1.36805	2.40645	0.966363	0.814763			ENSSSCG00000020704	9	12	2.38252	3.17786	0.998883	0.370907
ENSSSCG00000004149	118	164	1.81504	2.40724	0.906515	0.407386			ENSSSCG00000021552	8	9	2.38252	2.64325	0.999124	0.143454
ENSSSCG00000027367	32	5	13.0694	2.41034	0.00661489	-2.43891			ENSSSCG00000000408	7	13	2.38719	4.53947	0.997929	0.8027
ENSSSCG00000004373	20	21	2.10519	2.41149	0.990983	0.195974			ENSSSCG00000013576	41	47	2.38738	2.71415	0.998347	0.182497
ENSSSCG00000028023	9	10	2.00317	2.41344	0.993281	0.268761			ENSSSCG00000015506	87	96	2.38757	2.73086	0.998249	0.13004
ENSSSCG00000008728	52	60	2.16457	2.41371	0.985597	0.157146			ENSSSCG00000004113	90	62	2.3889	1.69315	0.987125	-0.541482
ENSSSCG00000010645	48	42	2.50811	2.41448	0.986912	-0.0548704			ENSSSCG00000010143	135	105	2.39177	2.01189	0.993801	-0.370299
ENSSSCG00000009362	24	44	1.23721	2.41606	0.885257	0.965601			ENSSSCG00000030683	23	17	2.39205	1.92673	0.99822	-0.426493
ENSSSCG00000016717	58	40	3.42774	2.418	0.958941	-0.503427			ENSSSCG00000005484	71	100	2.39351	3.24695	0.990494	0.478129
ENSSSCG00000016106	39	27	3.0076	2.42056	0.974282	-0.313248			ENSSSCG00000000910	42	31	2.39502	1.75295	0.997069	-0.437384
ENSSSCG00000009676	82	50	4.37471	2.42195	0.819215	-0.852985			ENSSSCG00000003949	113	124	2.39562	2.51923	0.998258	0.122402
ENSSSCG00000029722	21	31	1.56909	2.42347	0.97797	0.627155			ENSSSCG00000025317	18	23	2.39794	3.1424	0.99849	0.32788
ENSSSCG00000021026	50	52	2.36426	2.42493	0.988401	0.0365121			ENSSSCG00000022994	13	19	2.39953	3.86157	0.99823	0.506531
ENSSSCG00000030013	154	166	2.13625	2.42508	0.987514	0.18293			ENSSSCG00000021196	124	111	2.40031	2.05435	0.997996	-0.169079
ENSSSCG00000009580	88	44	4.91557	2.42515	0.240101	-1.01926			ENSSSCG00000030458	24	36	2.4005	3.15574	0.996328	0.556492
ENSSSCG00000000260	12	28	1.10175	2.42593	0.859615	1.13866			ENSSSCG00000029665	32	25	2.40548	1.98906	0.998073	-0.355018
ENSSSCG00000016716	57	70	1.83091	2.42716	0.980761	0.40674			ENSSSCG00000028522	37	29	2.41045	1.92901	0.997902	-0.35204
ENSSSCG00000002783	33	52	1.5424	2.43009	0.940258	0.655839			ENSSSCG00000008748	26	26	2.41112	2.6191	0.998754	-0.0102774
ENSSSCG00000012564	36	42	1.99675	2.43015	0.986943	0.283385			ENSSSCG00000020876	54	46	2.41456	1.99474	0.998055	-0.237509
ENSSSCG00000005399	64	69	2.0172	2.4302	0.987344	0.268721			ENSSSCG00000013569	30	24	2.41567	1.81656	0.998263	-0.321347
ENSSSCG00000010403	153	96	3.80391	2.43201	0.601083	-0.645336			ENSSSCG00000030645	45	38	2.41682	2.15074	0.998153	-0.248934
ENSSSCG00000021436	9	24	1.00488	2.43247	0.836978	1.27539			ENSSSCG00000022630	18	19	2.41888	2.33268	0.998866	0.0641115
ENSSSCG00000003205	26	20	3.067	2.43375	0.986969	-0.333618			ENSSSCG00000029860	40	32	2.42574	2.15154	0.997941	-0.324082
ENSSSCG00000004341	13	10	2.97195	2.43535	0.991517	-0.287275			ENSSSCG00000014088	47	36	2.42585	2.01599	0.997267	-0.386494
ENSSSCG00000022676	7	11	1.35322	2.43627	0.990437	0.848317			ENSSSCG00000004004	21	27	2.42655	3.19858	0.998321	0.338589
ENSSSCG00000025097	37	24	4.14808	2.43676	0.967506	-0.767463			ENSSSCG00000027677	27	29	2.42999	2.36564	0.998696	0.0894548
ENSSSCG00000009229	68	74	2.1025	2.44215	0.986993	0.216076			ENSSSCG00000023795	10	3	2.43032	0.689113	0.995186	-1.4833
ENSSSCG00000009153	12	6	4.37096	2.44245	0.984129	-0.839605			ENSSSCG00000009720	84	76	2.43236	2.43143	0.998186	-0.153242
ENSSSCG00000003437	59	28	5.42467	2.44527	0.477664	-1.14953			ENSSSCG00000029345	45	60	2.43239	3.14563	0.996554	0.397215
ENSSSCG00000030616	77	74	2.21605	2.44633	0.987835	0.142578			ENSSSCG00000025645	27	26	2.43267	2.60403	0.998733	-0.0628746
ENSSSCG00000004233	8	7	1.53842	2.447	0.993906	0.669583			ENSSSCG00000009824	16	9	2.43652	1.40764	0.99747	-0.779231
ENSSSCG00000017538	12	24	1.26427	2.44956	0.950129	0.954207			ENSSSCG00000020965	97	100	2.43925	2.56428	0.998474	0.0329828
ENSSSCG00000002857	42	48	1.9059	2.45061	0.986912	0.362663			ENSSSCG00000029106	33	52	2.43959	4.10142	0.991553	0.631032
ENSSSCG00000001985	39	62	1.52958	2.4528	0.915312	0.681275			ENSSSCG00000023698	10	17	2.44121	4.23443	0.997693	0.703879
ENSSSCG00000015310	161	165	2.0267	2.45601	0.988858	0.277178			ENSSSCG00000022306	15	7	2.44133	1.15862	0.996169	-1.01555
ENSSSCG00000025470	13	14	2.30904	2.45691	0.992268	0.089571			ENSSSCG00000004897	46	48	2.44527	2.63598	0.998554	0.0497624
ENSSSCG00000014894	365	181	5.04753	2.45841	0.000153296	-1.03785			ENSSSCG00000009975	36	36	2.4469	2.24579	0.998646	-0.0103775
ENSSSCG00000018047	32	86	1.01032	2.4607	0.00438429	1.28429			ENSSSCG00000010597	22	20	2.44814	2.39103	0.99877	-0.141822
ENSSSCG00000009612	46	43	2.81013	2.46377	0.988402	-0.189736			ENSSSCG00000003382	45	46	2.44931	2.42744	0.998577	0.0206372
ENSSSCG00000021588	16	23	1.65416	2.46789	0.984786	0.57715			ENSSSCG00000016087	28	32	2.44948	3.19022	0.99856	0.176478
ENSSSCG00000016086	18	20	2.15028	2.46926	0.99091	0.199564			ENSSSCG00000008896	40	48	2.45339	2.88294	0.998114	0.247104
ENSSSCG00000001800	33	29	2.81936	2.47411	0.98864	-0.188484			ENSSSCG00000029076	6	8	2.45387	2.90183	0.999099	0.356171
ENSSSCG00000021423	3	8	0.887795	2.47491	0.985656	1.47906			ENSSSCG00000028964	38	57	2.45493	3.61037	0.993068	0.562927
ENSSSCG00000030602	10	8	2.70434	2.47519	0.992919	-0.12771			ENSSSCG00000030337	91	86	2.45761	2.09456	0.998376	-0.0912123
ENSSSCG00000011775	76	35	4.53641	2.47736	0.172016	-0.872721			ENSSSCG00000003982	41	55	2.46044	3.52102	0.996703	0.405152
ENSSSCG00000029770	29	24	2.99316	2.47738	0.988104	-0.272862			ENSSSCG00000005315	26	33	2.46283	3.01169	0.998171	0.32297
ENSSSCG00000027572	13	31	1.0178	2.47785	0.795234	1.28366			ENSSSCG00000012284	57	45	2.46429	2.17858	0.997257	-0.34529
ENSSSCG00000024621	44	34	2.96123	2.47901	0.981774	-0.256424			ENSSSCG00000022283	63	52	2.46619	2.32642	0.997633	-0.282856
ENSSSCG00000014276	21	27	1.87972	2.4833	0.986983	0.401756			ENSSSCG00000016933	19	10	2.46638	1.28721	0.996028	-0.876256
ENSSSCG00000023626	8	17	1.23474	2.48461	0.968124	1.00885			ENSSSCG00000026183	58	65	2.46716	2.68529	0.998286	0.151431
ENSSSCG00000015115	56	57	2.40992	2.48684	0.988359	0.0453172			ENSSSCG00000014618	129	133	2.46734	2.76848	0.99851	0.033171
ENSSSCG00000030205	10	16	1.65722	2.4881	0.98606	0.586297			ENSSSCG00000014397	15	27	2.47181	3.99962	0.994501	0.799694
ENSSSCG00000000574	8	5	3.25734	2.49078	0.992443	-0.387067			ENSSSCG00000023216	29	27	2.47242	2.48466	0.998678	-0.11006
ENSSSCG00000010806	9	27	0.850238	2.49555	0.639441	1.55351			ENSSSCG00000004055	40	45	2.47356	2.73106	0.998432	0.155839
ENSSSCG00000020843	49	37	3.04055	2.49565	0.978392	-0.284912			ENSSSCG00000023957	14	11	2.47422	1.9893	0.998824	-0.33338
ENSSSCG00000000073	8	4	4.40008	2.49595	0.990277	-0.817918			ENSSSCG00000030391	22	15	2.47507	1.56247	0.997875	-0.535452
ENSSSCG00000009650	121	166	1.70393	2.49767	0.918515	0.55176			ENSSSCG00000008444	82	101	2.4751	3.21524	0.996937	0.287056
ENSSSCG00000021068	64	70	2.12269	2.5041	0.986959	0.238392			ENSSSCG00000021792	10	6	2.47674	1.51415	0.998649	-0.666412
ENSSSCG00000010544	117	131	2.2048	2.50436	0.985246	0.183817			ENSSSCG00000029979	25	25	2.47742	2.17495	0.998768	-0.0102632
ENSSSCG00000002490	30	17	4.91154	2.50673	0.955782	-0.970374			ENSSSCG00000025850	55	72	2.47784	3.2188	0.996384	0.372366
ENSSSCG00000023123	32	17	4.73819	2.50723	0.932117	-0.918262			ENSSSCG00000015954	47	60	2.47926	2.83462	0.997268	0.335726
ENSSSCG00000030516	93	85	2.56248	2.50797	0.98652	-0.0310147			ENSSSCG00000023463	22	21	2.47941	2.21608	0.998805	-0.0745174
ENSSSCG00000003719	127	72	4.52987	2.50802	0.333098	-0.852942			ENSSSCG00000006799	56	57	2.48306	2.98189	0.998529	0.0146453
ENSSSCG00000006768	16	17	2.18573	2.50888	0.991657	0.19896			ENSSSCG00000003077	52	35	2.4836	1.79517	0.993682	-0.569239
ENSSSCG00000013119	11	17	1.6075	2.51283	0.986283	0.644477			ENSSSCG00000007594	14	10	2.48487	1.95684	0.998657	-0.459581
ENSSSCG00000016971	16	25	1.50672	2.51403	0.97881	0.738592			ENSSSCG00000021717	19	15	2.48495	1.89274	0.998622	-0.333178
ENSSSCG00000030323	18	9	4.07885	2.51612	0.970647	-0.696991			ENSSSCG00000022411	43	36	2.48512	2.36535	0.998145	-0.260777
ENSSSCG00000009021	52	40	2.91091	2.51618	0.979183	-0.210219			ENSSSCG00000017570	20	20	2.48555	2.38757	0.998848	-0.0101714
ENSSSCG00000029702	35	20	3.75737	2.51814	0.944266	-0.577399			ENSSSCG00000029593	66	78	2.49041	3.41064	0.997826	0.227393
ENSSSCG00000003192	69	49	3.74219	2.51834	0.958527	-0.571437			ENSSSCG00000021967	15	7	2.49074	1.84954	0.996169	-1.01555
ENSSSCG00000014004	67	48	3.68662	2.51923	0.962071	-0.549325			ENSSSCG00000004005	40	11	2.49277	0.72963	0.202302	-1.78819
ENSSSCG00000005472	18	44	1.06013	2.52061	0.447947	1.24957			ENSSSCG00000029249	46	62	2.49584	3.30895	0.996214	0.412732
ENSSSCG00000030655	5	10	1.07229	2.52188	0.987437	1.2338			ENSSSCG00000016740	32	36	2.49594	2.49691	0.998537	0.155003
ENSSSCG00000027042	32	36	1.91819	2.52327	0.988471	0.395559			ENSSSCG00000000433	34	33	2.49638	2.31943	0.998656	-0.0522563
ENSSSCG00000016618	64	61	2.31435	2.5235	0.987937	0.124788			ENSSSCG00000030351	34	33	2.49745	2.30682	0.998656	-0.0522563
ENSSSCG00000029521	49	28	4.47177	2.52544	0.893274	-0.824344			ENSSSCG00000008319	20	17	2.49773	2.2463	0.998729	-0.233264
ENSSSCG00000003070	46	33	3.24731	2.526	0.974166	-0.362386			ENSSSCG00000000475	11	17	2.49812	4.03718	0.998173	0.577602
ENSSSCG00000029347	21	39	1.25571	2.52644	0.904456	1.00859			ENSSSCG00000021822	50	41	2.49849	2.07982	0.997853	-0.290929
ENSSSCG00000026554	10	11	2.41367	2.52695	0.993002	0.0661793			ENSSSCG00000029751	14	29	2.49852	5.30214	0.987219	0.992959
ENSSSCG00000008852	32	27	2.68048	2.5279	0.987983	-0.0845627			ENSSSCG00000008066	36	35	2.50002	2.82853	0.998638	-0.049972
ENSSSCG00000005893	79	57	3.42806	2.52863	0.957145	-0.43907			ENSSSCG00000017904	30	32	2.50153	2.64902	0.998665	0.0800448
ENSSSCG00000001624	24	66	1.04515	2.53011	0.0227011	1.27542			ENSSSCG00000030013	186	166	2.50175	2.37056	0.997918	-0.17384
ENSSSCG00000006992	19	17	2.85253	2.53099	0.991065	-0.172519			ENSSSCG00000023631	83	96	2.50497	2.8388	0.997898	0.197207
ENSSSCG00000011913	54	34	3.54995	2.53161	0.933175	-0.48777			ENSSSCG00000013180	40	46	2.50529	2.83227	0.998347	0.186907
ENSSSCG00000010943	9	15	1.58916	2.53233	0.985768	0.672148			ENSSSCG00000005582	46	29	2.50563	1.6788	0.992041	-0.659195
ENSSSCG00000000544	9	19	1.18818	2.53264	0.961543	1.09184			ENSSSCG00000006826	26	18	2.50576	1.65355	0.997623	-0.518612
ENSSSCG00000002383	30	39	2.01725	2.53314	0.982935	0.328478			ENSSSCG00000006635	79	71	2.5058	2.10265	0.998168	-0.162648
ENSSSCG00000027472	16	26	1.27685	2.53501	0.974526	0.98934			ENSSSCG00000005125	22	24	2.50954	3.21599	0.998758	0.110388
ENSSSCG00000022131	37	30	2.65195	2.53943	0.985885	-0.0625931			ENSSSCG00000017545	14	10	2.51173	1.79476	0.998657	-0.459581
ENSSSCG00000003942	9	5	4.27857	2.53982	0.990415	-0.752424			ENSSSCG00000003718	83	68	2.51265	2.16249	0.997139	-0.294549
ENSSSCG00000002917	59	56	2.56044	2.54078	0.988021	-0.0110864			ENSSSCG00000002857	59	51	2.5129	2.40255	0.998082	-0.217158
ENSSSCG00000014439	24	32	1.98699	2.54228	0.983924	0.355542			ENSSSCG00000014161	34	21	2.51309	1.78187	0.994655	-0.681701
ENSSSCG00000026625	38	26	3.66555	2.54384	0.973666	-0.527064			ENSSSCG00000013244	49	69	2.51364	3.34087	0.994275	0.475482
ENSSSCG00000009495	21	23	2.17404	2.54502	0.990487	0.227314			ENSSSCG00000001688	46	55	2.5145	2.78705	0.998022	0.242632
ENSSSCG00000006732	97	73	3.31787	2.5471	0.962136	-0.381415			ENSSSCG00000002955	65	73	2.51463	2.86692	0.998231	0.154707
ENSSSCG00000004586	89	59	3.54626	2.54764	0.90085	-0.477176			ENSSSCG00000028682	37	36	2.51504	2.31382	0.998629	-0.0489214
ENSSSCG00000027847	13	12	2.94898	2.54772	0.992497	-0.21103			ENSSSCG00000015403	44	37	2.51631	2.46846	0.998149	-0.254712
ENSSSCG00000004349	12	9	3.00715	2.54873	0.991697	-0.238659			ENSSSCG00000022786	56	67	2.51942	2.82544	0.997842	0.24435
ENSSSCG00000006345	66	57	2.8955	2.54892	0.985014	-0.183938			ENSSSCG00000017546	37	33	2.52008	2.35096	0.998492	-0.171122
ENSSSCG00000010031	80	100	2.0914	2.55061	0.974826	0.286368			ENSSSCG00000009074	25	18	2.52465	1.95716	0.997964	-0.464024
ENSSSCG00000029219	28	27	2.65686	2.55219	0.990086	-0.0580025			ENSSSCG00000028953	21	24	2.52624	2.97391	0.998705	0.174712
ENSSSCG00000016674	25	35	1.79758	2.5528	0.979616	0.506008			ENSSSCG00000016869	24	20	2.52919	2.28779	0.99858	-0.262458
ENSSSCG00000020674	6	15	0.912851	2.55352	0.960256	1.48395			ENSSSCG00000015027	22	22	2.52979	2.37697	0.998813	-0.0102129
ENSSSCG00000017296	116	91	4.16194	2.55375	0.968791	-0.704597			ENSSSCG00000008282	22	14	2.53024	1.60206	0.997387	-0.628929
ENSSSCG00000014950	8	7	2.87028	2.55402	0.993906	-0.168443			ENSSSCG00000016968	154	143	2.53154	2.64145	0.998301	-0.116826
ENSSSCG00000022815	38	54	1.82782	2.55433	0.966406	0.48282			ENSSSCG00000007066	10	8	2.53306	2.08837	0.999024	-0.30103
ENSSSCG00000010455	23	50	1.07516	2.55498	0.567578	1.24872			ENSSSCG00000024967	9	8	2.53424	2.0915	0.999117	-0.162631
ENSSSCG00000030182	43	44	2.68571	2.55974	0.988861	-0.0693234			ENSSSCG00000006702	73	59	2.536	2.26493	0.997136	-0.313353
ENSSSCG00000027786	79	94	2.35988	2.56172	0.981407	0.118376			ENSSSCG00000027446	65	59	2.5401	2.29386	0.998293	-0.148133
ENSSSCG00000029067	19	20	2.68421	2.56263	0.991139	-0.0668839			ENSSSCG00000007093	60	62	2.54418	2.6315	0.998505	0.0361046
ENSSSCG00000007117	63	54	3.00336	2.5647	0.98487	-0.227807			ENSSSCG00000024403	34	51	2.54419	3.9949	0.994139	0.561617
ENSSSCG00000014539	52	40	2.95016	2.56514	0.979183	-0.201798			ENSSSCG00000008727	35	47	2.54712	3.08631	0.997113	0.405279
ENSSSCG00000021594	10	6	3.68201	2.5654	0.990454	-0.521306			ENSSSCG00000005661	83	117	2.55073	3.40017	0.987869	0.480099
ENSSSCG00000008589	25	32	1.90304	2.56762	0.985681	0.432145			ENSSSCG00000029602	35	41	2.5521	2.89711	0.998345	0.212372
ENSSSCG00000017510	101	76	3.57943	2.57247	0.960846	-0.476547			ENSSSCG00000010222	23	21	2.55406	2.32094	0.998755	-0.136096
ENSSSCG00000021974	8	2	7.49723	2.57248	0.974436	-1.54318			ENSSSCG00000009222	56	48	2.55508	2.3816	0.998066	-0.228905
ENSSSCG00000029613	137	100	3.41538	2.57394	0.932827	-0.408099			ENSSSCG00000028104	8	9	2.55576	2.49908	0.999124	0.143454
ENSSSCG00000007074	8	5	3.54201	2.57409	0.992443	-0.460496			ENSSSCG00000011245	12	13	2.55589	2.77335	0.999	0.0975232
ENSSSCG00000011353	50	40	3.17271	2.57511	0.982645	-0.301083			ENSSSCG00000004351	36	33	2.55608	2.68715	0.998566	-0.132578
ENSSSCG00000005575	36	48	1.74594	2.5769	0.978095	0.561666			ENSSSCG00000006917	112	98	2.55653	2.3587	0.997784	-0.201491
ENSSSCG00000010180	56	56	2.42105	2.58184	0.988412	0.0927146			ENSSSCG00000008051	149	172	2.55664	2.83622	0.997697	0.195307
ENSSSCG00000002424	29	27	2.49236	2.58425	0.989803	0.0522379			ENSSSCG00000009328	19	13	2.55677	1.91755	0.998155	-0.526611
ENSSSCG00000026841	14	15	2.63014	2.58477	0.992052	-0.025065			ENSSSCG00000016873	45	56	2.56278	3.25757	0.997673	0.299267
ENSSSCG00000024881	72	33	4.87168	2.5895	0.203101	-0.911752			ENSSSCG00000011306	24	18	2.56335	2.12203	0.99823	-0.40729
ENSSSCG00000030526	27	32	2.26691	2.58967	0.987983	0.192064			ENSSSCG00000002823	18	12	2.56446	1.75246	0.998128	-0.559753
ENSSSCG00000023929	60	40	3.92804	2.58974	0.946591	-0.60101			ENSSSCG00000011065	44	40	2.56474	2.60747	0.99846	-0.144917
ENSSSCG00000010196	57	42	3.05907	2.59013	0.972463	-0.240099			ENSSSCG00000013897	59	66	2.56491	2.81518	0.998288	0.148871
ENSSSCG00000001758	66	64	2.56062	2.59162	0.988075	0.0173612			ENSSSCG00000024517	46	42	2.56496	2.56432	0.998453	-0.138933
ENSSSCG00000027056	43	40	2.59854	2.59327	0.988533	-0.00288995			ENSSSCG00000009653	50	33	2.56546	1.82656	0.993228	-0.596277
ENSSSCG00000026493	17	13	2.98769	2.59398	0.989943	-0.203857			ENSSSCG00000017824	24	15	2.56637	1.54354	0.996917	-0.656088
ENSSSCG00000013928	24	27	2.55642	2.59917	0.989639	0.0239541			ENSSSCG00000015594	25	30	2.56714	2.82334	0.998473	0.24404
ENSSSCG00000023994	43	38	2.89443	2.59978	0.987632	-0.154864			ENSSSCG00000024368	4	9	2.57073	4.88688	0.998133	1.00024
ENSSSCG00000005124	40	39	2.18214	2.60092	0.989089	0.253294			ENSSSCG00000016705	40	49	2.57507	2.93407	0.997962	0.276287
ENSSSCG00000016071	30	30	2.32545	2.60103	0.989902	0.161525			ENSSSCG00000011289	20	22	2.5762	2.81545	0.998786	0.121438
ENSSSCG00000030354	117	74	3.80129	2.60103	0.75747	-0.547426			ENSSSCG00000016717	44	50	2.5772	2.99287	0.998347	0.170377
ENSSSCG00000011973	24	34	1.15557	2.60173	0.979263	1.17081			ENSSSCG00000015590	73	88	2.58036	3.25136	0.997485	0.255968
ENSSSCG00000006572	228	82	7.17919	2.60261	1.16649e-07	-1.46387			ENSSSCG00000016443	16	18	2.5821	2.75217	0.998853	0.150952
ENSSSCG00000008893	203	138	3.73379	2.60519	0.762519	-0.519251			ENSSSCG00000001752	63	57	2.58256	2.50104	0.998291	-0.152653
ENSSSCG00000028552	46	68	1.76616	2.60521	0.942773	0.560745			ENSSSCG00000007117	52	82	2.58503	4.01504	0.978629	0.63726
ENSSSCG00000008397	266	40	15.4325	2.60788	0	-2.56501			ENSSSCG00000005110	447	380	2.58601	2.43775	0.996734	-0.244367
ENSSSCG00000027114	96	72	3.6152	2.6112	0.961465	-0.469362			ENSSSCG00000009605	42	44	2.58626	2.66907	0.998575	0.0552641
ENSSSCG00000007139	59	78	2.12553	2.6151	0.969264	0.299064			ENSSSCG00000022839	120	132	2.58659	2.85486	0.998243	0.12592
ENSSSCG00000002349	70	47	3.79447	2.61654	0.937083	-0.536272			ENSSSCG00000013292	59	50	2.59032	2.12572	0.997943	-0.245205
ENSSSCG00000013895	27	59	1.25895	2.61676	0.385706	1.05553			ENSSSCG00000024419	51	44	2.59236	2.53942	0.998174	-0.219305
ENSSSCG00000016018	49	47	2.65178	2.61809	0.98851	-0.0184518			ENSSSCG00000021177	33	25	2.59359	2.1917	0.997833	-0.398174
ENSSSCG00000029237	14	21	1.93954	2.61843	0.98436	0.433001			ENSSSCG00000014216	35	36	2.59596	2.93911	0.998647	0.0292244
ENSSSCG00000006252	60	38	3.82168	2.6202	0.923707	-0.544538			ENSSSCG00000005613	49	45	2.59672	2.36476	0.998443	-0.130895
ENSSSCG00000026898	43	44	2.28914	2.62184	0.988861	0.195777			ENSSSCG00000027916	26	37	2.597	3.22548	0.997008	0.483707
ENSSSCG00000025270	268	92	8.15756	2.624	3.11191e-09	-1.63638			ENSSSCG00000023186	25	29	2.59743	2.95496	0.99858	0.196639
ENSSSCG00000013773	140	93	4.13928	2.62584	0.80844	-0.65663			ENSSSCG00000029353	45	30	2.59864	1.67736	0.994591	-0.580722
ENSSSCG00000007594	10	12	1.99315	2.62615	0.99242	0.39789			ENSSSCG00000029029	75	74	2.60159	2.87607	0.998483	-0.0296403
ENSSSCG00000005297	85	78	2.94747	2.6266	0.986751	-0.166295			ENSSSCG00000011638	8	5	2.60216	1.55328	0.998924	-0.59942
ENSSSCG00000002706	32	31	2.54496	2.62799	0.989692	0.0462996			ENSSSCG00000009937	195	214	2.60293	2.88561	0.998348	0.122926
ENSSSCG00000006463	64	137	1.27213	2.63604	0.00997817	1.05114			ENSSSCG00000005971	29	24	2.60386	2.33414	0.998423	-0.273936
ENSSSCG00000007583	19	21	2.57932	2.63854	0.990762	0.0327384			ENSSSCG00000011182	40	45	2.60657	2.94254	0.998432	0.155839
ENSSSCG00000029170	21	23	2.14471	2.63864	0.990487	0.298997			ENSSSCG00000015432	56	76	2.60769	3.57435	0.995125	0.423825
ENSSSCG00000004101	54	57	2.41065	2.63877	0.988063	0.13043			ENSSSCG00000001431	25	37	2.60778	3.75775	0.996435	0.538294
ENSSSCG00000016715	37	49	1.8907	2.63944	0.978392	0.48129			ENSSSCG00000005374	27	29	2.60841	2.69194	0.998696	0.0894548
ENSSSCG00000016999	9	21	1.29704	2.64033	0.932096	1.02552			ENSSSCG00000002898	71	61	2.60954	2.18294	0.997899	-0.226435
ENSSSCG00000015802	101	90	2.78942	2.64035	0.985313	-0.0791983			ENSSSCG00000009694	12	10	2.60993	1.92905	0.998969	-0.252121
ENSSSCG00000027873	64	66	2.25234	2.64587	0.988075	0.23236			ENSSSCG00000022075	22	22	2.6105	2.40498	0.998813	-0.0102129
ENSSSCG00000026536	16	31	1.30904	2.64798	0.92667	1.01644			ENSSSCG00000001517	29	25	2.61065	2.11908	0.998541	-0.217217
ENSSSCG00000027197	63	71	2.55019	2.65174	0.985925	0.0563072			ENSSSCG00000015410	26	25	2.61116	2.73995	0.998746	-0.0648507
ENSSSCG00000003881	21	19	2.72677	2.65846	0.990762	-0.0365964			ENSSSCG00000000950	118	90	2.61503	2.00757	0.993362	-0.397814
ENSSSCG00000025325	101	141	2.00426	2.66262	0.915832	0.409737			ENSSSCG00000011077	26	24	2.61607	2.43219	0.998714	-0.12157
ENSSSCG00000006957	38	64	1.73256	2.66292	0.861027	0.62006			ENSSSCG00000002936	33	29	2.62168	2.59304	0.998515	-0.191271
ENSSSCG00000028104	8	10	2.33345	2.66504	0.992919	0.19164			ENSSSCG00000011056	52	47	2.62225	2.42969	0.998369	-0.15359
ENSSSCG00000013833	35	50	1.97303	2.66583	0.968188	0.434178			ENSSSCG00000027458	12	14	2.62432	2.93297	0.998935	0.197479
ENSSSCG00000007738	54	39	3.72852	2.66631	0.970859	-0.483756			ENSSSCG00000010544	138	142	2.62466	2.73196	0.998528	0.0303724
ENSSSCG00000000204	76	72	2.86294	2.66713	0.987633	-0.102205			ENSSSCG00000023976	66	87	2.62499	3.43532	0.995516	0.383157
ENSSSCG00000017749	5	17	0.705764	2.66733	0.864212	1.91805			ENSSSCG00000017498	27	24	2.62559	2.26106	0.998644	-0.174167
ENSSSCG00000000795	69	74	2.60243	2.66757	0.987353	0.0356996			ENSSSCG00000011125	67	96	2.62733	3.76608	0.989357	0.502336
ENSSSCG00000002378	69	55	2.91211	2.66834	0.978887	-0.126139			ENSSSCG00000007963	71	82	2.62765	3.01558	0.997996	0.194768
ENSSSCG00000022365	22	29	1.71303	2.66875	0.985492	0.639666			ENSSSCG00000015581	184	126	2.62854	1.99312	0.941128	-0.553507
ENSSSCG00000006161	13	15	2.71603	2.66972	0.991775	-0.0248058			ENSSSCG00000022365	38	29	2.63015	2.32312	0.99765	-0.38958
ENSSSCG00000003979	22	14	3.6932	2.67084	0.981334	-0.467599			ENSSSCG00000006095	33	30	2.63573	2.80625	0.998589	-0.143871
ENSSSCG00000006173	34	20	4.19421	2.6718	0.954163	-0.650584			ENSSSCG00000029837	39	58	2.63741	4.09007	0.993304	0.551026
ENSSSCG00000000884	83	81	2.23402	2.6807	0.98796	0.262981			ENSSSCG00000017535	16	23	2.63975	3.35811	0.998008	0.488953
ENSSSCG00000013246	20	18	2.90302	2.68414	0.99091	-0.113106			ENSSSCG00000009237	58	51	2.63991	2.45894	0.998193	-0.192882
ENSSSCG00000024244	32	18	4.28322	2.68474	0.948727	-0.673928			ENSSSCG00000028164	19	19	2.64003	2.61883	0.998866	-0.0101476
ENSSSCG00000029180	173	111	4.25867	2.68508	0.622212	-0.665437			ENSSSCG00000022796	22	11	2.64196	1.40438	0.99371	-0.952329
ENSSSCG00000009151	57	30	4.98431	2.68516	0.738615	-0.892361			ENSSSCG00000015346	7	9	2.64295	3.36392	0.999068	0.314749
ENSSSCG00000020956	14	4	7.90096	2.68594	0.917474	-1.55663			ENSSSCG00000022585	24	23	2.64307	2.69532	0.998774	-0.0692883
ENSSSCG00000004684	55	30	4.16371	2.68725	0.811734	-0.631709			ENSSSCG00000007200	38	41	2.64312	2.64807	0.998562	0.096685
ENSSSCG00000011918	98	121	2.05874	2.6876	0.974753	0.384585			ENSSSCG00000014950	7	9	2.64328	3.10079	0.999068	0.314749
ENSSSCG00000002727	9	6	3.86545	2.69012	0.992261	-0.522995			ENSSSCG00000029533	67	80	2.64546	3.05126	0.997699	0.242094
ENSSSCG00000014015	22	27	2.22641	2.69023	0.988188	0.273001			ENSSSCG00000011112	29	50	2.64898	4.69776	0.984826	0.756429
ENSSSCG00000030623	40	65	1.65745	2.69091	0.891399	0.69908			ENSSSCG00000011750	65	62	2.64956	2.76685	0.998452	-0.0776738
ENSSSCG00000021976	205	233	2.26295	2.69162	0.984827	0.250227			ENSSSCG00000021206	34	26	2.65017	2.17356	0.997852	-0.385503
ENSSSCG00000012885	99	108	2.68245	2.6936	0.986551	0.00595746			ENSSSCG00000014121	88	75	2.65097	2.54169	0.997636	-0.23851
ENSSSCG00000001074	57	64	2.20024	2.69651	0.986383	0.293453			ENSSSCG00000026403	30	29	2.6547	2.34114	0.998697	-0.0577257
ENSSSCG00000010167	57	39	3.60467	2.69732	0.957776	-0.418363			ENSSSCG00000016690	24	33	2.65594	3.5303	0.997645	0.434292
ENSSSCG00000008827	21	11	4.36506	2.6992	0.967213	-0.693483			ENSSSCG00000025747	42	54	2.65908	3.96091	0.997372	0.345126
ENSSSCG00000028790	38	51	2.12446	2.70004	0.976307	0.345836			ENSSSCG00000025934	20	20	2.65927	2.79779	0.998848	-0.0101714
ENSSSCG00000002633	163	153	3.00422	2.70084	0.987915	-0.153594			ENSSSCG00000017819	61	69	2.6599	3.12729	0.998216	0.164762
ENSSSCG00000027073	36	25	3.58841	2.703	0.976634	-0.408779			ENSSSCG00000025325	128	123	2.66013	2.45146	0.998444	-0.0676284
ENSSSCG00000028088	69	55	3.28703	2.70381	0.978887	-0.281783			ENSSSCG00000006099	58	40	2.66174	2.0239	0.993712	-0.536224
ENSSSCG00000024302	6	13	1.31699	2.70536	0.978806	1.03859			ENSSSCG00000008394	12	13	2.66285	3.16382	0.999	0.0975232
ENSSSCG00000012411	98	75	3.29658	2.70743	0.966313	-0.284071			ENSSSCG00000024691	6	10	2.66372	3.99382	0.998687	0.647465
ENSSSCG00000005894	136	138	2.91278	2.71034	0.988519	-0.103954			ENSSSCG00000028869	85	87	2.66398	3.12613	0.998479	0.0226588
ENSSSCG00000011454	48	56	2.05251	2.71212	0.985463	0.402028			ENSSSCG00000010087	23	35	2.66405	3.63534	0.996211	0.575955
ENSSSCG00000008586	16	22	1.89948	2.71317	0.986835	0.514376			ENSSSCG00000008356	10	13	2.66481	3.36956	0.998865	0.339908
ENSSSCG00000021924	27	17	4.60724	2.71769	0.975404	-0.761504			ENSSSCG00000011765	97	77	2.66626	2.35147	0.996082	-0.340083
ENSSSCG00000024361	46	48	2.50032	2.71801	0.98855	0.120444			ENSSSCG00000025258	18	22	2.66763	2.97304	0.998634	0.26632
ENSSSCG00000001621	68	81	2.40315	2.71847	0.982191	0.177854			ENSSSCG00000009437	40	33	2.66767	2.25033	0.998131	-0.280935
ENSSSCG00000029979	43	34	3.7768	2.72014	0.983437	-0.473505			ENSSSCG00000004220	36	37	2.67218	3.18488	0.998638	0.0281592
ENSSSCG00000027437	70	46	4.24566	2.72292	0.92594	-0.640858			ENSSSCG00000009731	34	27	2.67385	2.39329	0.998092	-0.332919
ENSSSCG00000024622	50	42	2.78299	2.72443	0.985235	-0.0307024			ENSSSCG00000015014	57	75	2.67464	3.67439	0.996128	0.379831
ENSSSCG00000002274	53	66	2.18585	2.72456	0.980101	0.317817			ENSSSCG00000003079	30	44	2.67488	3.65883	0.995796	0.528215
ENSSSCG00000014152	20	33	1.69691	2.72576	0.962062	0.683778			ENSSSCG00000003063	89	109	2.67734	3.14196	0.996936	0.279148
ENSSSCG00000020654	11	10	2.67486	2.72641	0.993002	0.0275123			ENSSSCG00000009216	30	23	2.6778	2.11119	0.99805	-0.380388
ENSSSCG00000002499	30	18	4.51327	2.72669	0.965624	-0.727027			ENSSSCG00000029134	25	60	2.68127	5.63592	0.550809	1.22198
ENSSSCG00000017669	18	21	2.08849	2.72762	0.990305	0.385165			ENSSSCG00000026699	44	36	2.68207	2.48022	0.997982	-0.293248
ENSSSCG00000010564	52	57	2.54704	2.72766	0.987397	0.098886			ENSSSCG00000027701	67	72	2.68283	3.08123	0.998408	0.0919497
ENSSSCG00000024695	8	12	1.94221	2.73025	0.990386	0.491368			ENSSSCG00000011608	26	27	2.68296	2.69718	0.998741	0.0423065
ENSSSCG00000012152	16	21	2.00123	2.73112	0.988428	0.448617			ENSSSCG00000009090	264	246	2.68519	2.86371	0.998506	-0.112115
ENSSSCG00000014900	13	7	4.671	2.73349	0.984856	-0.772982			ENSSSCG00000026493	16	9	2.68543	1.63737	0.99747	-0.779231
ENSSSCG00000020935	50	49	2.55806	2.73389	0.988589	0.0958878			ENSSSCG00000016918	116	101	2.69086	2.54251	0.997704	-0.208612
ENSSSCG00000028274	164	151	3.08216	2.73474	0.987154	-0.172578			ENSSSCG00000028419	14	15	2.69197	2.93921	0.99895	0.0834968
ENSSSCG00000023708	17	16	2.94511	2.73497	0.991657	-0.106776			ENSSSCG00000026602	91	108	2.69208	3.03617	0.997508	0.234233
ENSSSCG00000009862	84	85	2.64399	2.74585	0.988034	0.0545569			ENSSSCG00000010462	8	5	2.69522	1.77561	0.998924	-0.59942
ENSSSCG00000023928	18	31	1.33042	2.7474	0.958169	1.04621			ENSSSCG00000009757	13	7	2.70093	1.35469	0.997839	-0.822025
ENSSSCG00000030294	118	122	2.5697	2.75237	0.988082	0.0990902			ENSSSCG00000021741	42	25	2.70276	1.86028	0.990266	-0.737579
ENSSSCG00000031023	9	20	1.16029	2.75282	0.949092	1.2464			ENSSSCG00000002384	28	41	2.70316	4.2044	0.996175	0.524973
ENSSSCG00000021579	90	124	1.84865	2.75304	0.93548	0.574493			ENSSSCG00000008334	18	21	2.7048	3.23834	0.998742	0.202016
ENSSSCG00000027766	67	60	3.36789	2.75705	0.986431	-0.288698			ENSSSCG00000008378	44	37	2.70566	2.56081	0.998149	-0.254712
ENSSSCG00000026915	12	19	1.63396	2.75765	0.983747	0.755058			ENSSSCG00000026577	11	3	2.70769	0.754401	0.992549	-1.60958
ENSSSCG00000005000	66	78	1.9937	2.75848	0.982995	0.468436			ENSSSCG00000023814	15	14	2.70977	2.8904	0.998943	-0.103499
ENSSSCG00000026864	20	25	2.06397	2.76643	0.988273	0.422567			ENSSSCG00000029138	19	23	2.71051	3.64985	0.998626	0.253621
ENSSSCG00000021557	50	18	7.71894	2.76684	0.113987	-1.48018			ENSSSCG00000006151	46	44	2.7131	2.99589	0.998545	-0.073254
ENSSSCG00000001370	28	30	2.29461	2.76779	0.989707	0.270497			ENSSSCG00000029796	47	43	2.71337	2.16725	0.998449	-0.136137
ENSSSCG00000007147	66	61	3.16574	2.76984	0.987347	-0.192743			ENSSSCG00000023743	23	33	2.71745	3.64578	0.997241	0.493349
ENSSSCG00000003620	68	87	2.23007	2.77447	0.973019	0.315119			ENSSSCG00000026248	66	86	2.7175	3.25059	0.995927	0.366658
ENSSSCG00000021051	50	53	2.60001	2.77575	0.988164	0.094392			ENSSSCG00000003989	33	33	2.71859	3.01363	0.998674	-0.0103537
ENSSSCG00000025893	158	185	2.45123	2.77836	0.981031	0.180766			ENSSSCG00000013105	130	131	2.71896	2.66484	0.998528	0.00040504
ENSSSCG00000002771	117	112	2.94471	2.77987	0.987849	-0.0830877			ENSSSCG00000023296	154	92	2.71989	1.9132	0.667041	-0.747927
ENSSSCG00000025185	8	3	5.98943	2.78141	0.985656	-1.1066			ENSSSCG00000008089	66	44	2.72298	2.0072	0.989946	-0.585377
ENSSSCG00000013616	69	61	3.28612	2.78228	0.985868	-0.240098			ENSSSCG00000011083	6	10	2.72338	4.46941	0.998687	0.647465
ENSSSCG00000021546	40	33	2.73963	2.7829	0.985969	0.0226238			ENSSSCG00000026041	68	44	2.72389	1.95102	0.986199	-0.627854
ENSSSCG00000011699	50	45	2.79815	2.78404	0.987488	-0.00733987			ENSSSCG00000004634	54	57	2.72572	3.27788	0.998497	0.0662381
ENSSSCG00000023854	17	35	1.39851	2.78486	0.867238	0.993745			ENSSSCG00000022028	9	12	2.73621	3.63457	0.998883	0.370907
ENSSSCG00000013294	92	83	3.10812	2.79019	0.986027	-0.155664			ENSSSCG00000026233	56	59	2.74467	3.40347	0.998492	0.0636055
ENSSSCG00000028538	124	71	4.25646	2.79034	0.387874	-0.609247			ENSSSCG00000005423	94	113	2.74659	3.40235	0.997255	0.252646
ENSSSCG00000000111	30	50	1.87433	2.79141	0.919564	0.574637			ENSSSCG00000024393	41	18	2.74707	1.4061	0.919177	-1.15734
ENSSSCG00000024876	9	7	3.38836	2.79181	0.993192	-0.279409			ENSSSCG00000006463	135	162	2.74727	3.27896	0.996918	0.250798
ENSSSCG00000029692	6	10	1.77845	2.7928	0.990454	0.651051			ENSSSCG00000023708	15	17	2.74733	2.95573	0.998872	0.160516
ENSSSCG00000021440	35	33	2.58095	2.79285	0.989285	0.113834			ENSSSCG00000005198	69	87	2.74857	3.68672	0.996728	0.319901
ENSSSCG00000003204	132	84	4.41441	2.79356	0.722741	-0.660092			ENSSSCG00000000745	58	40	2.74906	1.83327	0.993712	-0.536224
ENSSSCG00000024845	10	28	1.01534	2.79545	0.690869	1.4612			ENSSSCG00000004242	69	50	2.74961	2.31217	0.994446	-0.467831
ENSSSCG00000027787	21	6	8.8802	2.79662	0.713763	-1.66692			ENSSSCG00000012267	103	92	2.7511	2.65456	0.998027	-0.171932
ENSSSCG00000021874	46	38	3.21425	2.79948	0.985052	-0.199335			ENSSSCG00000029217	39	30	2.75116	2.21071	0.997674	-0.378769
ENSSSCG00000002758	21	19	3.45126	2.80225	0.990762	-0.300528			ENSSSCG00000009283	68	69	2.7515	2.67199	0.9985	0.010274
ENSSSCG00000007476	28	68	1.2787	2.80406	0.0835665	1.13286			ENSSSCG00000022204	186	243	2.7519	3.36115	0.989284	0.373359
ENSSSCG00000002672	39	37	3.10091	2.80521	0.98901	-0.144583			ENSSSCG00000007797	98	101	2.7524	2.86203	0.998475	0.0325483
ENSSSCG00000030672	46	42	3.14762	2.80535	0.98805	-0.166046			ENSSSCG00000013119	20	17	2.75269	2.42039	0.998729	-0.233264
ENSSSCG00000007324	137	200	2.04799	2.80706	0.787971	0.454865			ENSSSCG00000027693	45	36	2.75318	2.33882	0.997786	-0.325004
ENSSSCG00000016968	139	138	2.49204	2.80751	0.988579	0.171982			ENSSSCG00000022260	10	15	2.7551	3.93134	0.998458	0.533341
ENSSSCG00000009683	190	198	2.6527	2.80827	0.989126	0.0822355			ENSSSCG00000007575	90	105	2.75583	2.83623	0.997755	0.209725
ENSSSCG00000029980	12	24	1.37004	2.80869	0.950129	1.03573			ENSSSCG00000030908	10	11	2.76065	3.19557	0.999057	0.116464
ENSSSCG00000022023	92	98	2.57827	2.80934	0.987313	0.123791			ENSSSCG00000026780	48	45	2.76151	3.01093	0.998499	-0.101709
ENSSSCG00000029576	39	30	3.34543	2.81	0.982935	-0.251609			ENSSSCG00000009037	87	66	2.76247	2.10463	0.994929	-0.40419
ENSSSCG00000024397	101	78	3.6058	2.81291	0.967798	-0.358261			ENSSSCG00000025893	171	203	2.76306	3.18975	0.997037	0.235651
ENSSSCG00000006290	80	48	4.35134	2.81466	0.801927	-0.628465			ENSSSCG00000006250	100	90	2.76515	2.61819	0.998098	-0.161061
ENSSSCG00000015487	22	14	2.24748	2.81667	0.981334	0.325685			ENSSSCG00000022499	19	25	2.76561	3.28262	0.998309	0.369381
ENSSSCG00000009784	42	82	1.53501	2.81685	0.368589	0.87587			ENSSSCG00000024033	12	12	2.76647	2.8069	0.999029	-0.00987715
ENSSSCG00000030180	4	13	0.85214	2.81879	0.943954	1.72599			ENSSSCG00000008179	106	96	2.76796	2.77263	0.99813	-0.152193
ENSSSCG00000017635	49	55	2.56116	2.81984	0.986899	0.138773			ENSSSCG00000004034	33	52	2.7708	4.42298	0.991553	0.631032
ENSSSCG00000008378	35	36	2.36103	2.82017	0.989363	0.256399			ENSSSCG00000023485	56	67	2.77142	3.24644	0.997842	0.24435
ENSSSCG00000022088	10	12	2.2931	2.82231	0.99242	0.299572			ENSSSCG00000020818	78	84	2.77231	2.93156	0.998376	0.0951677
ENSSSCG00000015979	42	46	2.59184	2.8229	0.98805	0.123224			ENSSSCG00000011309	97	83	2.77362	2.65454	0.997601	-0.233088
ENSSSCG00000007482	180	131	3.83442	2.82539	0.910738	-0.440546			ENSSSCG00000022296	17	34	2.77421	5.8281	0.984129	0.951644
ENSSSCG00000022256	2	12	0.512487	2.82554	0.840926	2.46288			ENSSSCG00000029033	18	12	2.77558	1.87061	0.998128	-0.559753
ENSSSCG00000012126	128	37	9.09596	2.82652	4.86053e-07	-1.68622			ENSSSCG00000017583	29	35	2.77633	3.15048	0.998341	0.253209
ENSSSCG00000023212	12	16	2.23443	2.82863	0.990041	0.340201			ENSSSCG00000015492	38	41	2.78136	3.27464	0.998562	0.096685
ENSSSCG00000013874	24	28	2.52533	2.8303	0.988973	0.1645			ENSSSCG00000009961	38	35	2.78847	2.52126	0.998552	-0.126057
ENSSSCG00000008588	39	11	10.079	2.83219	0.0694733	-1.83136			ENSSSCG00000023026	40	50	2.78972	3.6664	0.99778	0.30489
ENSSSCG00000029597	29	29	2.72508	2.83241	0.990003	0.0557158			ENSSSCG00000024861	10	7	2.7898	1.9832	0.998894	-0.472184
ENSSSCG00000004631	27	29	2.30669	2.83671	0.989803	0.298383			ENSSSCG00000003831	26	34	2.79098	3.73424	0.997964	0.364864
ENSSSCG00000016662	17	25	1.8826	2.83767	0.982492	0.591996			ENSSSCG00000024830	22	25	2.79274	2.83202	0.998693	0.167107
ENSSSCG00000008902	43	48	2.3457	2.83844	0.987523	0.275059			ENSSSCG00000028157	33	28	2.79442	2.67841	0.998411	-0.240282
ENSSSCG00000006757	42	53	2.2798	2.83854	0.981388	0.316221			ENSSSCG00000023154	26	21	2.79644	2.04336	0.998431	-0.306475
ENSSSCG00000024651	2	94	0.0679936	2.84145	0	5.38497			ENSSSCG00000009822	23	14	2.79779	1.75091	0.996797	-0.690508
ENSSSCG00000015550	7	8	2.45739	2.84235	0.993906	0.209977			ENSSSCG00000023455	35	37	2.79954	2.84955	0.998622	0.0677612
ENSSSCG00000001207	56	67	2.24481	2.84292	0.983085	0.340776			ENSSSCG00000010084	21	39	2.80064	5.02885	0.985864	0.854105
ENSSSCG00000024207	35	20	5.0255	2.84488	0.944266	-0.820889			ENSSSCG00000001882	36	47	2.80093	3.52679	0.997455	0.365677
ENSSSCG00000030660	52	49	2.61043	2.84611	0.988193	0.124715			ENSSSCG00000003527	113	138	2.80173	3.35866	0.996643	0.27563
ENSSSCG00000009111	304	95	8.60002	2.85014	1.32039e-11	-1.59332			ENSSSCG00000000078	50	51	2.80229	2.96136	0.998552	0.0175959
ENSSSCG00000014895	21	10	6.11769	2.85062	0.954012	-1.10172			ENSSSCG00000028488	21	15	2.80656	1.89281	0.998194	-0.471128
ENSSSCG00000007954	97	184	1.59732	2.85176	0.02734	0.836238			ENSSSCG00000017638	129	184	2.80954	3.05329	0.96957	0.498644
ENSSSCG00000026967	42	48	2.41072	2.85178	0.986912	0.242421			ENSSSCG00000022846	78	96	2.81056	3.2821	0.997034	0.285818
ENSSSCG00000011245	21	13	4.41284	2.85732	0.980806	-0.627042			ENSSSCG00000025967	12	8	2.81241	1.71349	0.998662	-0.543414
ENSSSCG00000009768	48	38	3.34561	2.85769	0.982386	-0.22741			ENSSSCG00000014838	30	29	2.81352	3.05635	0.998697	-0.0577257
ENSSSCG00000015667	42	35	3.20826	2.85855	0.986016	-0.1665			ENSSSCG00000016997	42	62	2.81369	4.09705	0.992984	0.54125
ENSSSCG00000027288	56	41	3.94982	2.86349	0.97196	-0.464			ENSSSCG00000015840	73	66	2.81466	2.92128	0.998231	-0.154001
ENSSSCG00000029967	68	64	2.74505	2.86429	0.987657	0.0613239			ENSSSCG00000028912	93	108	2.81904	3.37228	0.997793	0.203183
ENSSSCG00000017193	57	60	2.86785	2.86494	0.988002	-0.00150994			ENSSSCG00000029382	16	24	2.81917	4.78224	0.997654	0.547994
ENSSSCG00000012688	7	8	2.32269	2.86526	0.993906	0.302883			ENSSSCG00000027766	50	49	2.81938	2.45894	0.998548	-0.0390553
ENSSSCG00000004166	74	77	2.4078	2.86586	0.987835	0.251273			ENSSSCG00000021038	69	70	2.81978	3.07367	0.998498	0.009977
ENSSSCG00000023744	90	77	3.62577	2.86653	0.983085	-0.339009			ENSSSCG00000001718	44	54	2.81981	3.90062	0.997843	0.279437
ENSSSCG00000016511	41	26	4.14071	2.8701	0.958129	-0.528774			ENSSSCG00000030778	23	42	2.82117	4.94842	0.984852	0.832693
ENSSSCG00000030707	75	76	2.94742	2.87427	0.988061	-0.0362322			ENSSSCG00000027546	20	7	2.82161	1.0354	0.978724	-1.40933
ENSSSCG00000003710	79	74	2.87578	2.87496	0.987375	-0.00040139			ENSSSCG00000007349	46	56	2.82235	3.38086	0.99787	0.268195
ENSSSCG00000006037	74	73	2.50341	2.88208	0.988075	0.203232			ENSSSCG00000013428	8	6	2.82237	1.87291	0.999086	-0.374915
ENSSSCG00000022850	75	98	2.26995	2.88245	0.966313	0.344628			ENSSSCG00000024206	100	109	2.82974	3.29475	0.998301	0.112671
ENSSSCG00000011944	13	10	3.53861	2.8855	0.991517	-0.294357			ENSSSCG00000026746	48	41	2.83147	2.76538	0.998164	-0.233135
ENSSSCG00000002681	82	75	3.02584	2.88592	0.986694	-0.0682953			ENSSSCG00000024261	96	84	2.83193	2.34911	0.997866	-0.201194
ENSSSCG00000006503	19	21	2.73067	2.88615	0.990762	0.0799004			ENSSSCG00000002397	51	59	2.83287	3.23208	0.998175	0.196221
ENSSSCG00000004055	50	49	2.97942	2.88637	0.988589	-0.0457506			ENSSSCG00000021984	16	7	2.83317	1.34458	0.994751	-1.10337
ENSSSCG00000004405	21	26	2.20424	2.88722	0.988231	0.389416			ENSSSCG00000026536	34	27	2.83317	2.27123	0.998092	-0.332919
ENSSSCG00000012329	128	125	2.96334	2.88743	0.988286	-0.0374337			ENSSSCG00000009839	198	178	2.83407	2.59946	0.998023	-0.163455
ENSSSCG00000005941	38	24	4.56405	2.88835	0.961678	-0.66006			ENSSSCG00000000165	15	12	2.83581	2.57539	0.998807	-0.310856
ENSSSCG00000021723	10	9	3.26068	2.89283	0.993281	-0.172715			ENSSSCG00000016426	44	41	2.83727	2.68428	0.998517	-0.110101
ENSSSCG00000028589	10	15	1.78475	2.89437	0.988459	0.697502			ENSSSCG00000005657	140	176	2.83796	3.33252	0.99495	0.317604
ENSSSCG00000006159	9	63	0.455049	2.89445	4.16072e-07	2.66938			ENSSSCG00000001983	17	22	2.84119	3.60961	0.998491	0.34461
ENSSSCG00000001344	50	49	3.01356	2.89689	0.988589	-0.0569781			ENSSSCG00000027410	127	148	2.84284	3.50094	0.99759	0.208696
ENSSSCG00000004989	41	59	1.90575	2.89699	0.96003	0.604163			ENSSSCG00000016178	19	31	2.84334	4.40512	0.995581	0.669577
ENSSSCG00000027093	66	39	4.43129	2.89761	0.846634	-0.612872			ENSSSCG00000030680	74	77	2.84505	3.0308	0.998467	0.0461143
ENSSSCG00000025934	18	20	2.47556	2.89835	0.99091	0.227478			ENSSSCG00000025425	79	101	2.84579	3.50729	0.995985	0.340212
ENSSSCG00000027410	103	119	2.38526	2.8999	0.983073	0.281832			ENSSSCG00000005403	94	88	2.84616	3.13198	0.998337	-0.104727
ENSSSCG00000004763	10	12	2.6915	2.89998	0.99242	0.107642			ENSSSCG00000015487	16	12	2.84821	1.26039	0.998645	-0.39868
ENSSSCG00000020792	11	18	1.72785	2.90103	0.983337	0.747531			ENSSSCG00000016853	88	85	2.84863	3.15495	0.99844	-0.0600384
ENSSSCG00000005832	196	146	4.29506	2.90147	0.927564	-0.565893			ENSSSCG00000028721	11	9	2.85201	2.58611	0.998996	-0.27432
ENSSSCG00000014203	25	18	3.99359	2.90284	0.985093	-0.460245			ENSSSCG00000009786	126	176	2.85243	3.85034	0.979676	0.468548
ENSSSCG00000004549	19	30	1.87458	2.90454	0.972519	0.631707			ENSSSCG00000010173	91	78	2.85252	2.6437	0.997676	-0.230477
ENSSSCG00000016451	32	38	2.57273	2.90458	0.986969	0.175056			ENSSSCG00000000265	148	156	2.85571	2.92797	0.998491	0.0649019
ENSSSCG00000016684	83	110	2.12972	2.90619	0.959023	0.448484			ENSSSCG00000010054	53	56	2.85575	2.82504	0.998499	0.0676257
ENSSSCG00000011514	17	15	2.89401	2.90761	0.991402	0.00676389			ENSSSCG00000029897	23	13	2.86035	1.76418	0.995793	-0.790464
ENSSSCG00000026670	10	4	6.28531	2.90774	0.981517	-1.1121			ENSSSCG00000005999	34	25	2.861	2.17718	0.997535	-0.440077
ENSSSCG00000006971	26	19	3.6406	2.90868	0.985215	-0.323802			ENSSSCG00000001518	317	362	2.86134	3.18025	0.998038	0.180361
ENSSSCG00000023594	54	20	7.94018	2.91084	0.097134	-1.44776			ENSSSCG00000018031	74	58	2.86257	2.38307	0.996528	-0.357008
ENSSSCG00000007066	17	10	4.31094	2.91734	0.982828	-0.563355			ENSSSCG00000016502	105	108	2.86262	2.98465	0.998482	0.0297335
ENSSSCG00000015531	66	55	3.07007	2.91794	0.98299	-0.0733552			ENSSSCG00000014842	40	38	2.86342	2.89717	0.998582	-0.0826638
ENSSSCG00000006900	22	17	3.40093	2.91794	0.988393	-0.220986			ENSSSCG00000017471	45	26	2.86723	1.80808	0.986122	-0.780452
ENSSSCG00000021552	12	9	3.66319	2.92255	0.991697	-0.325852			ENSSSCG00000015694	73	61	2.86915	2.70356	0.997593	-0.266
ENSSSCG00000002726	65	65	3.19976	2.92325	0.98821	-0.130384			ENSSSCG00000015450	49	72	2.86973	3.98853	0.991474	0.536075
ENSSSCG00000025283	44	49	2.79727	2.92422	0.987505	0.064007			ENSSSCG00000026023	14	16	2.87157	3.00151	0.998892	0.171284
ENSSSCG00000001421	60	62	3.20302	2.92766	0.988142	-0.129656			ENSSSCG00000015238	193	183	2.87477	2.83066	0.998491	-0.0869714
ENSSSCG00000027343	24	22	3.28447	2.92861	0.990359	-0.165463			ENSSSCG00000028080	44	46	2.87746	3.4759	0.998564	0.0523934
ENSSSCG00000008038	111	73	4.83368	2.92924	0.849718	-0.722621			ENSSSCG00000010900	15	6	2.88082	1.2089	0.993995	-1.20978
ENSSSCG00000014406	12	8	4.35207	2.92994	0.990386	-0.57086			ENSSSCG00000006762	81	107	2.88211	3.97632	0.99444	0.387068
ENSSSCG00000003857	75	55	3.49774	2.93122	0.963621	-0.254915			ENSSSCG00000005252	29	29	2.88298	3.00092	0.998717	-0.0103145
ENSSSCG00000017391	146	108	4.43105	2.93144	0.937967	-0.596075			ENSSSCG00000014203	18	16	2.88402	2.56596	0.998837	-0.171132
ENSSSCG00000009069	9	7	3.26036	2.93717	0.993192	-0.150607			ENSSSCG00000025141	57	54	2.88476	2.69088	0.998468	-0.0871793
ENSSSCG00000015598	53	66	2.35568	2.93816	0.980101	0.318777			ENSSSCG00000009236	64	47	2.88574	2.36115	0.995372	-0.448379
ENSSSCG00000007336	32	33	2.74368	2.93849	0.989604	0.0989572			ENSSSCG00000024679	22	21	2.88744	2.79337	0.998805	-0.0745174
ENSSSCG00000009713	34	54	1.79139	2.94003	0.933175	0.714729			ENSSSCG00000016401	146	245	2.88914	4.63955	0.277163	0.732503
ENSSSCG00000028126	49	49	2.89869	2.9404	0.988654	0.0206064			ENSSSCG00000017041	46	67	2.89038	3.89899	0.992888	0.523017
ENSSSCG00000024341	153	141	3.40535	2.94226	0.98706	-0.21088			ENSSSCG00000016295	58	62	2.89164	2.96344	0.998454	0.0842533
ENSSSCG00000011881	26	30	2.25323	2.94272	0.988832	0.385165			ENSSSCG00000010391	112	111	2.89234	3.06349	0.998492	-0.02339
ENSSSCG00000017589	144	72	6.28674	2.94517	0.0292615	-1.09394			ENSSSCG00000028381	112	160	2.89238	3.8083	0.975709	0.500411
ENSSSCG00000003986	33	33	2.60989	2.94657	0.989627	0.175057			ENSSSCG00000023482	55	50	2.89264	3.01297	0.998365	-0.145553
ENSSSCG00000023725	17	7	6.32751	2.94688	0.952053	-1.10244			ENSSSCG00000007814	23	33	2.89286	3.78452	0.997241	0.493349
ENSSSCG00000026275	24	18	3.73146	2.94746	0.98692	-0.340264			ENSSSCG00000021888	74	69	2.89286	2.85243	0.998361	-0.110134
ENSSSCG00000021341	19	12	4.02262	2.94783	0.983747	-0.44849			ENSSSCG00000002722	43	30	2.89649	2.09795	0.996048	-0.516495
ENSSSCG00000027286	67	80	2.64569	2.94812	0.982079	0.156136			ENSSSCG00000027617	30	16	2.89984	1.72099	0.990973	-0.8794
ENSSSCG00000000607	19	27	1.88454	2.9491	0.983031	0.646093			ENSSSCG00000016119	73	91	2.90201	3.71449	0.996875	0.303829
ENSSSCG00000028054	71	78	2.85361	2.95149	0.98662	0.0486652			ENSSSCG00000025348	16	18	2.9048	3.48998	0.998853	0.150952
ENSSSCG00000024134	82	85	2.91048	2.95166	0.987835	0.0202791			ENSSSCG00000017571	43	39	2.90499	2.69714	0.998464	-0.148124
ENSSSCG00000012399	85	91	2.87026	2.95193	0.987203	0.0404423			ENSSSCG00000029784	56	64	2.90814	3.24944	0.998197	0.179196
ENSSSCG00000011385	56	58	2.83007	2.95467	0.988228	0.0621586			ENSSSCG00000011873	44	30	2.90878	2.15599	0.995394	-0.548966
ENSSSCG00000006274	349	302	3.29654	2.95467	0.98442	-0.157923			ENSSSCG00000027020	35	21	2.91016	1.96518	0.993459	-0.722421
ENSSSCG00000006206	56	47	2.92731	2.95718	0.984486	0.0146612			ENSSSCG00000014180	86	69	2.91082	2.68658	0.996666	-0.324439
ENSSSCG00000003676	14	9	4.28353	2.95786	0.988395	-0.534217			ENSSSCG00000014163	52	39	2.91409	2.54344	0.996696	-0.416991
ENSSSCG00000026715	42	23	5.59326	2.95873	0.89868	-0.918736			ENSSSCG00000002412	56	56	2.91682	2.98886	0.998532	-0.0104723
ENSSSCG00000005278	213	178	3.30577	2.95894	0.977431	-0.159939			ENSSSCG00000028631	28	27	2.91731	2.66011	0.99872	-0.0610375
ENSSSCG00000003941	385	392	3.15162	2.96143	0.992476	-0.0898051			ENSSSCG00000009650	216	162	2.91778	2.34994	0.983316	-0.423559
ENSSSCG00000004601	22	27	1.98722	2.96175	0.988188	0.575737			ENSSSCG00000030984	22	16	2.91961	1.93138	0.998208	-0.447665
ENSSSCG00000003814	34	28	3.0328	2.96315	0.986993	-0.0334944			ENSSSCG00000014819	67	52	2.92022	2.13679	0.996596	-0.370409
ENSSSCG00000007504	35	75	1.53671	2.96497	0.20796	0.948197			ENSSSCG00000012203	99	106	2.92235	3.48348	0.998381	0.0871208
ENSSSCG00000028792	11	13	2.63579	2.96555	0.992193	0.170083			ENSSSCG00000024274	41	45	2.92302	3.58157	0.998496	0.121017
ENSSSCG00000000647	4	26	0.42815	2.96685	0.0383193	2.7926			ENSSSCG00000021649	58	63	2.92351	3.16052	0.99841	0.106995
ENSSSCG00000014951	27	36	2.11431	2.96747	0.982451	0.489068			ENSSSCG00000001538	56	61	2.92359	3.08845	0.998411	0.110959
ENSSSCG00000027285	8	17	1.51981	2.96823	0.968124	0.965707			ENSSSCG00000024010	56	48	2.92417	2.79221	0.998066	-0.228905
ENSSSCG00000003141	70	58	3.61935	2.97905	0.982168	-0.280874			ENSSSCG00000014894	203	230	2.9266	3.2857	0.997998	0.168776
ENSSSCG00000003198	37	51	2.21013	2.97948	0.973032	0.430959			ENSSSCG00000006648	24	24	2.92662	3.16984	0.998783	-0.0102477
ENSSSCG00000007034	32	33	2.75868	2.98682	0.989604	0.114612			ENSSSCG00000016313	63	41	2.92702	1.89197	0.98871	-0.618894
ENSSSCG00000002081	16	17	2.62111	2.98946	0.991657	0.189732			ENSSSCG00000030791	6	17	2.92762	4.82731	0.988496	1.36108
ENSSSCG00000022283	45	59	1.96949	2.99198	0.976286	0.603281			ENSSSCG00000006072	19	17	2.92812	2.8735	0.998819	-0.162641
ENSSSCG00000028964	26	49	1.66711	2.99243	0.825462	0.843962			ENSSSCG00000015531	67	92	2.92997	4.41722	0.993326	0.441543
ENSSSCG00000002451	88	131	2.20561	2.9943	0.845922	0.441048			ENSSSCG00000020678	17	28	2.93422	4.51514	0.996032	0.679822
ENSSSCG00000008449	50	46	3.00189	3.00295	0.987932	0.000528557			ENSSSCG00000022754	105	118	2.93503	3.22571	0.998088	0.156435
ENSSSCG00000009945	108	74	4.31733	3.00354	0.903836	-0.523485			ENSSSCG00000029967	77	100	2.93725	4.19322	0.995486	0.362547
ENSSSCG00000028338	56	71	2.4098	3.01166	0.977366	0.321665			ENSSSCG00000009873	80	81	2.94409	2.82903	0.998487	0.00719108
ENSSSCG00000012489	29	24	4.42795	3.01171	0.988104	-0.556077			ENSSSCG00000030526	34	28	2.94501	2.32903	0.998272	-0.282185
ENSSSCG00000011531	16	26	1.74025	3.01173	0.974526	0.791242			ENSSSCG00000020843	49	50	2.94855	3.18811	0.998557	0.0181559
ENSSSCG00000027164	63	76	2.22333	3.01334	0.981599	0.438642			ENSSSCG00000025866	137	192	2.94947	3.91878	0.975417	0.473539
ENSSSCG00000009023	14	22	2.01094	3.01358	0.981334	0.583647			ENSSSCG00000020935	61	57	2.95108	3.00827	0.998417	-0.1068
ENSSSCG00000030564	6	9	2.02286	3.016	0.992261	0.576211			ENSSSCG00000029271	13	7	2.95246	1.80451	0.997839	-0.822025
ENSSSCG00000025606	118	93	3.2555	3.01787	0.969586	-0.109334			ENSSSCG00000010012	44	39	2.95262	2.40217	0.998383	-0.180595
ENSSSCG00000006347	32	29	3.01048	3.02033	0.989204	0.00468874			ENSSSCG00000026136	11	16	2.95322	4.48081	0.99847	0.494852
ENSSSCG00000009462	12	10	3.61691	3.02243	0.99242	-0.259059			ENSSSCG00000005995	55	36	2.95513	2.19374	0.991581	-0.609178
ENSSSCG00000001948	42	45	2.66856	3.02421	0.988444	0.18047			ENSSSCG00000010429	70	92	2.95577	4.52441	0.995386	0.379198
ENSSSCG00000024844	21	19	3.37774	3.02689	0.990762	-0.1582			ENSSSCG00000015145	65	67	2.96414	3.09389	0.998495	0.0326118
ENSSSCG00000011061	43	54	2.16239	3.02691	0.981544	0.485208			ENSSSCG00000029204	3	8	2.96435	6.48482	0.997939	1.17415
ENSSSCG00000015882	99	108	2.43283	3.03126	0.986551	0.317319			ENSSSCG00000015039	33	21	2.96609	2.07415	0.995591	-0.639798
ENSSSCG00000026731	44	80	1.60566	3.03237	0.604497	0.917258			ENSSSCG00000003987	39	56	2.96618	4.3627	0.994974	0.50122
ENSSSCG00000025023	63	68	2.95028	3.0338	0.987345	0.0402643			ENSSSCG00000004071	56	58	2.96651	3.21912	0.998516	0.0393331
ENSSSCG00000023631	86	106	2.5323	3.03556	0.976352	0.261533			ENSSSCG00000026817	167	189	2.96781	3.11755	0.997984	0.167011
ENSSSCG00000008360	64	62	3.28799	3.0365	0.988107	-0.114801			ENSSSCG00000000816	61	44	2.96874	2.35135	0.995063	-0.473366
ENSSSCG00000021013	27	37	2.58943	3.03656	0.980234	0.229839			ENSSSCG00000021976	270	319	2.96988	3.65049	0.997077	0.229218
ENSSSCG00000029843	44	61	2.60086	3.03667	0.966939	0.223493			ENSSSCG00000012006	71	57	2.97012	2.65395	0.997079	-0.322748
ENSSSCG00000013291	58	37	8.11864	3.03673	0.93138	-1.41873			ENSSSCG00000016856	28	28	2.97253	3.18922	0.998729	-0.010303
ENSSSCG00000022493	64	72	2.54746	3.03816	0.985953	0.254135			ENSSSCG00000007504	62	53	2.97459	2.30745	0.997967	-0.233114
ENSSSCG00000029517	32	33	2.60708	3.03861	0.989604	0.220961			ENSSSCG00000024920	56	79	2.97627	4.25999	0.993068	0.47901
ENSSSCG00000023041	7	17	1.31096	3.04273	0.952053	1.21468			ENSSSCG00000023894	207	236	2.97878	3.21141	0.997904	0.177756
ENSSSCG00000022335	26	27	3.17055	3.04699	0.990197	-0.0573664			ENSSSCG00000025598	59	46	2.98057	2.57764	0.997002	-0.363188
ENSSSCG00000024800	17	55	0.806647	3.04812	0.0133186	1.91798			ENSSSCG00000001865	60	37	2.98135	2.07519	0.983876	-0.694167
ENSSSCG00000000606	10	9	3.22805	3.04909	0.993281	-0.0823018			ENSSSCG00000010034	130	140	2.98184	3.24423	0.998375	0.0956048
ENSSSCG00000028721	7	9	2.05545	3.05176	0.993192	0.570171			ENSSSCG00000002875	23	43	2.98398	5.48936	0.981007	0.865906
ENSSSCG00000030888	18	38	1.48864	3.05663	0.812792	1.03797			ENSSSCG00000010042	29	32	2.98509	3.66523	0.998625	0.127456
ENSSSCG00000010844	33	37	2.52752	3.05726	0.98842	0.274547			ENSSSCG00000000657	26	22	2.9856	2.76716	0.998564	-0.242171
ENSSSCG00000001676	66	62	3.63613	3.05787	0.987671	-0.249851			ENSSSCG00000029943	28	25	2.98679	2.99802	0.998634	-0.168195
ENSSSCG00000022888	90	88	3.20069	3.0582	0.987971	-0.0657047			ENSSSCG00000009035	19	9	2.98842	1.54518	0.994273	-1.01456
ENSSSCG00000017676	65	50	3.74425	3.05833	0.975649	-0.291966			ENSSSCG00000002353	110	139	2.99078	3.99	0.995432	0.324474
ENSSSCG00000001646	101	122	2.44571	3.06426	0.97812	0.32531			ENSSSCG00000000874	36	36	2.99238	2.92723	0.998646	-0.0103775
ENSSSCG00000029106	50	37	3.82056	3.06483	0.975932	-0.318006			ENSSSCG00000000884	117	103	2.99256	2.87236	0.997836	-0.192866
ENSSSCG00000022077	26	25	2.99626	3.06569	0.990312	0.0330344			ENSSSCG00000021769	14	12	2.99442	2.50375	0.99892	-0.217337
ENSSSCG00000001206	42	30	3.99267	3.06708	0.975846	-0.380489			ENSSSCG00000009764	43	45	2.99463	2.93606	0.998569	0.0537968
ENSSSCG00000012818	9	20	1.57045	3.06839	0.949092	0.966263			ENSSSCG00000029645	9	15	2.99705	4.88124	0.998083	0.67174
ENSSSCG00000013053	84	82	3.51021	3.06879	0.98796	-0.193879			ENSSSCG00000015261	66	75	2.99847	3.39201	0.998154	0.171495
ENSSSCG00000002410	21	26	2.20099	3.06959	0.988231	0.479892			ENSSSCG00000016945	46	54	2.999	4.04495	0.99815	0.216608
ENSSSCG00000030544	70	92	2.44694	3.06976	0.966464	0.32719			ENSSSCG00000022832	38	34	2.99943	2.8918	0.998487	-0.166769
ENSSSCG00000009598	38	38	2.72027	3.07303	0.989244	0.175882			ENSSSCG00000027847	13	7	3.00036	1.52324	0.997839	-0.822025
ENSSSCG00000005058	42	32	3.71585	3.07563	0.981409	-0.272844			ENSSSCG00000012329	125	153	3.00476	3.44919	0.996413	0.279065
ENSSSCG00000016969	14	8	5.01644	3.07816	0.98538	-0.704565			ENSSSCG00000024644	21	14	3.00709	1.99815	0.997835	-0.564605
ENSSSCG00000028047	20	20	2.84068	3.0788	0.991157	0.116122			ENSSSCG00000012911	97	104	3.00731	3.02817	0.998376	0.08905
ENSSSCG00000025182	29	46	1.9873	3.07979	0.948609	0.632027			ENSSSCG00000002439	22	57	3.00752	7.35503	0.410241	1.32652
ENSSSCG00000015037	12	10	3.30637	3.0809	0.99242	-0.101909			ENSSSCG00000006283	78	81	3.0083	3.3203	0.998466	0.043291
ENSSSCG00000014335	20	19	3.28255	3.08139	0.991139	-0.091253			ENSSSCG00000004661	59	48	3.00844	2.89008	0.997565	-0.302991
ENSSSCG00000029076	17	8	6.11658	3.08183	0.968124	-0.988957			ENSSSCG00000029924	105	117	3.00877	3.27673	0.998156	0.144254
ENSSSCG00000016960	37	31	3.17062	3.08235	0.986975	-0.0407018			ENSSSCG00000015834	43	50	3.00917	3.42084	0.99825	0.202848
ENSSSCG00000001988	67	80	2.64312	3.08362	0.982079	0.222385			ENSSSCG00000023407	14	27	3.01111	6.06382	0.992445	0.893213
ENSSSCG00000009655	33	40	2.4252	3.08545	0.985969	0.347401			ENSSSCG00000012663	68	63	3.01165	4.66145	0.998359	-0.119127
ENSSSCG00000024749	25	25	2.79052	3.08762	0.990455	0.145962			ENSSSCG00000004961	81	120	3.01453	4.44391	0.976689	0.551131
ENSSSCG00000022075	20	29	2.19734	3.09143	0.980667	0.492528			ENSSSCG00000001750	56	42	3.01673	2.25065	0.996458	-0.4176
ENSSSCG00000015052	77	74	3.06593	3.09243	0.987835	0.0124163			ENSSSCG00000002639	51	77	3.01681	4.27012	0.987822	0.575071
ENSSSCG00000025661	72	54	3.84938	3.09253	0.969606	-0.31586			ENSSSCG00000011414	9	9	3.01972	2.94077	0.999126	-0.00964462
ENSSSCG00000025402	22	19	3.30608	3.0955	0.990181	-0.0949579			ENSSSCG00000021266	56	54	3.02178	2.70289	0.998503	-0.0620587
ENSSSCG00000012359	66	70	3.10898	3.09774	0.987646	-0.00525319			ENSSSCG00000021581	128	136	3.0221	3.13433	0.998431	0.0762747
ENSSSCG00000016378	73	134	1.80318	3.09853	0.173179	0.781011			ENSSSCG00000009670	59	42	3.02227	2.45206	0.994824	-0.491687
ENSSSCG00000016053	30	33	2.86381	3.09881	0.989129	0.113779			ENSSSCG00000006733	102	94	3.02377	2.91594	0.99825	-0.127267
ENSSSCG00000028906	41	35	3.71497	3.10004	0.986949	-0.261094			ENSSSCG00000021304	91	86	3.02413	3.22954	0.998376	-0.0912123
ENSSSCG00000015315	72	66	3.0052	3.10085	0.986976	0.045226			ENSSSCG00000020883	55	49	3.02571	2.75879	0.998286	-0.174156
ENSSSCG00000011496	289	154	5.51688	3.10651	0.0047483	-0.828568			ENSSSCG00000014434	20	22	3.02651	2.98807	0.998786	0.121438
ENSSSCG00000013978	88	67	4.0952	3.10951	0.967708	-0.397251			ENSSSCG00000029597	33	24	3.02684	2.25275	0.997499	-0.454893
ENSSSCG00000005073	100	97	2.75013	3.11067	0.987926	0.177755			ENSSSCG00000017342	73	71	3.02774	2.72349	0.998468	-0.0500739
ENSSSCG00000007872	39	78	1.61985	3.11192	0.345031	0.941891			ENSSSCG00000025869	42	38	3.03024	2.62286	0.998468	-0.151488
ENSSSCG00000011222	29	10	8.47152	3.1124	0.61129	-1.44459			ENSSSCG00000018053	48	71	3.03109	4.18937	0.991184	0.545345
ENSSSCG00000008277	3	15	0.627171	3.11404	0.758706	2.31177			ENSSSCG00000012359	60	81	3.03128	3.84157	0.994986	0.4167
ENSSSCG00000027016	55	54	3.41725	3.11538	0.988416	-0.133439			ENSSSCG00000004549	30	36	3.0336	3.53094	0.998342	0.245392
ENSSSCG00000006579	6	11	1.3079	3.11593	0.987852	1.2524			ENSSSCG00000015315	79	86	3.03437	3.71841	0.998332	0.110581
ENSSSCG00000010900	19	15	3.70513	3.11622	0.989747	-0.249725			ENSSSCG00000004761	48	39	3.0366	2.41868	0.997828	-0.30363
ENSSSCG00000025616	25	8	8.60836	3.11862	0.666199	-1.46485			ENSSSCG00000025548	39	40	3.03911	3.30509	0.998615	0.0252798
ENSSSCG00000005471	61	52	3.83658	3.12013	0.984767	-0.298236			ENSSSCG00000016950	85	63	3.04301	2.53005	0.994019	-0.437148
ENSSSCG00000009075	96	64	4.04262	3.12114	0.894446	-0.373229			ENSSSCG00000018057	45	46	3.04341	2.87113	0.998577	0.0206372
ENSSSCG00000022786	89	79	3.76166	3.12196	0.985348	-0.268914			ENSSSCG00000004154	105	140	3.04514	3.90357	0.991911	0.401284
ENSSSCG00000004010	126	104	3.79613	3.12312	0.977477	-0.281539			ENSSSCG00000000002	93	105	3.04586	3.20895	0.998076	0.162896
ENSSSCG00000016141	33	38	2.64212	3.12344	0.987772	0.241432			ENSSSCG00000009209	29	29	3.04594	2.99112	0.998717	-0.0103145
ENSSSCG00000004311	9	9	2.78426	3.12541	0.993589	0.166726			ENSSSCG00000026798	106	92	3.04648	2.95417	0.997717	-0.212986
ENSSSCG00000003741	43	45	2.72492	3.12647	0.988682	0.198345			ENSSSCG00000015953	15	12	3.04668	2.32737	0.998807	-0.310856
ENSSSCG00000017574	8	10	2.39795	3.12722	0.992919	0.38304			ENSSSCG00000030616	118	78	3.04981	2.32145	0.963298	-0.601975
ENSSSCG00000015266	22	20	3.10247	3.12892	0.990621	0.0122243			ENSSSCG00000003655	89	98	3.04986	3.37722	0.998258	0.127056
ENSSSCG00000030831	24	32	2.41521	3.1293	0.983924	0.373697			ENSSSCG00000013414	142	130	3.05242	2.65944	0.998186	-0.137082
ENSSSCG00000014038	132	129	3.35273	3.1298	0.98835	-0.0992529			ENSSSCG00000014378	62	87	3.05476	4.06286	0.992458	0.472059
ENSSSCG00000021828	71	61	3.76739	3.12997	0.984415	-0.267407			ENSSSCG00000002625	7	9	3.05522	3.83707	0.999068	0.314749
ENSSSCG00000009956	36	44	2.36293	3.13101	0.984948	0.406065			ENSSSCG00000004645	64	64	3.056	3.34068	0.998509	-0.0104938
ENSSSCG00000022411	51	44	3.20543	3.1318	0.986181	-0.0335123			ENSSSCG00000016494	43	47	3.05679	3.70215	0.998489	0.115277
ENSSSCG00000029050	26	17	4.686	3.13334	0.979369	-0.580674			ENSSSCG00000024382	40	23	3.05914	1.70443	0.989018	-0.784515
ENSSSCG00000023665	58	29	5.644	3.13462	0.621522	-0.848437			ENSSSCG00000011312	84	114	3.06243	4.23232	0.992262	0.425839
ENSSSCG00000016131	34	48	2.07044	3.13482	0.971337	0.598464			ENSSSCG00000009598	46	45	3.06358	3.32291	0.998568	-0.0415026
ENSSSCG00000028883	18	34	1.53088	3.13629	0.921654	1.03468			ENSSSCG00000008893	166	153	3.06516	2.88763	0.998256	-0.12755
ENSSSCG00000023814	7	13	1.47617	3.13687	0.984856	1.08745			ENSSSCG00000000398	38	36	3.06572	3.10358	0.998596	-0.0864623
ENSSSCG00000012742	82	81	2.99285	3.13698	0.988037	0.0678415			ENSSSCG00000008827	16	20	3.06707	4.24251	0.998651	0.295784
ENSSSCG00000009170	19	26	1.98994	3.13735	0.985215	0.656874			ENSSSCG00000002081	19	12	3.06737	2.01433	0.997731	-0.634012
ENSSSCG00000001439	24	35	2.10854	3.13775	0.976113	0.573536			ENSSSCG00000003573	99	120	3.06965	3.00024	0.997022	0.264612
ENSSSCG00000030541	7	10	2.22178	3.14058	0.992072	0.499311			ENSSSCG00000014868	96	113	3.07428	3.84046	0.997592	0.222568
ENSSSCG00000030984	14	27	1.79323	3.14165	0.945927	0.809009			ENSSSCG00000013235	105	96	3.07497	2.86406	0.998198	-0.138638
ENSSSCG00000009827	74	49	4.47799	3.14545	0.924143	-0.509565			ENSSSCG00000013621	34	29	3.07547	2.63497	0.998408	-0.233174
ENSSSCG00000004662	9	18	1.45207	3.14685	0.970647	1.11579			ENSSSCG00000006793	28	26	3.07667	3.01081	0.99869	-0.113621
ENSSSCG00000015047	109	54	6.11282	3.14902	0.093151	-0.95694			ENSSSCG00000025606	124	116	3.07768	3.34141	0.998325	-0.106035
ENSSSCG00000024676	45	70	2.174	3.14934	0.912148	0.534679			ENSSSCG00000016114	109	90	3.09007	2.64674	0.996845	-0.284289
ENSSSCG00000027652	50	39	3.70477	3.15183	0.980871	-0.23322			ENSSSCG00000009636	28	28	3.09216	3.01915	0.998729	-0.010303
ENSSSCG00000004023	122	156	2.45459	3.15429	0.962442	0.361832			ENSSSCG00000001816	36	33	3.09228	3.19132	0.998566	-0.132578
ENSSSCG00000000959	71	72	3.13401	3.15909	0.988093	0.0115084			ENSSSCG00000026830	6	11	3.09236	5.63652	0.998327	0.773665
ENSSSCG00000029181	8	10	2.74776	3.15952	0.992919	0.201419			ENSSSCG00000008996	41	49	3.093	4.12812	0.998121	0.241464
ENSSSCG00000027243	112	85	4.25225	3.15967	0.960383	-0.428456			ENSSSCG00000028149	109	126	3.09379	3.64579	0.997775	0.196875
ENSSSCG00000010184	50	27	5.44673	3.15981	0.837305	-0.785549			ENSSSCG00000001706	108	134	3.09397	3.69186	0.996219	0.298231
ENSSSCG00000010536	101	138	2.34877	3.16203	0.934188	0.428913			ENSSSCG00000026799	16	28	3.09569	5.74577	0.994836	0.762605
ENSSSCG00000010962	16	16	2.85131	3.16307	0.991865	0.149719			ENSSSCG00000002933	32	14	3.09687	1.52536	0.966346	-1.15105
ENSSSCG00000028149	114	110	3.24212	3.16505	0.987959	-0.0346775			ENSSSCG00000006885	45	50	3.09896	3.5239	0.998423	0.138621
ENSSSCG00000004494	149	125	3.55203	3.16634	0.978981	-0.165834			ENSSSCG00000021041	34	22	3.0992	2.05116	0.995751	-0.617396
ENSSSCG00000029321	21	16	3.92728	3.16916	0.988428	-0.309419			ENSSSCG00000025849	67	67	3.09929	3.22244	0.998502	-0.0105006
ENSSSCG00000027166	69	82	2.68872	3.17095	0.9823	0.238029			ENSSSCG00000030141	65	48	3.10031	2.58154	0.995464	-0.440643
ENSSSCG00000004896	90	102	2.74088	3.17285	0.984747	0.211152			ENSSSCG00000002828	64	86	3.10371	4.5561	0.99485	0.410424
ENSSSCG00000003671	20	17	3.45355	3.17371	0.990435	-0.121935			ENSSSCG00000003802	11	17	3.10436	4.89789	0.998173	0.577602
ENSSSCG00000008996	48	35	3.8464	3.17393	0.975107	-0.277252			ENSSSCG00000011206	12	11	3.10803	2.96455	0.999021	-0.125921
ENSSSCG00000025065	17	29	1.89358	3.17604	0.963951	0.746079			ENSSSCG00000023913	15	21	3.11349	4.74973	0.998267	0.450913
ENSSSCG00000005506	132	108	3.72351	3.179	0.975738	-0.228086			ENSSSCG00000007548	14	15	3.11373	3.19406	0.99895	0.0834968
ENSSSCG00000015962	69	53	3.47854	3.18089	0.974397	-0.12903			ENSSSCG00000010151	251	216	3.11385	3.26136	0.997147	-0.226393
ENSSSCG00000009947	26	27	3.00409	3.18117	0.990197	0.0826382			ENSSSCG00000029200	143	145	3.11718	3.43854	0.99855	0.00932989
ENSSSCG00000002722	46	45	3.17925	3.18345	0.988761	0.00190461			ENSSSCG00000027843	27	33	3.12131	3.7206	0.998339	0.270372
ENSSSCG00000023749	147	106	4.81962	3.18661	0.918215	-0.596895			ENSSSCG00000014581	63	57	3.1215	2.56877	0.998291	-0.152653
ENSSSCG00000010302	123	110	3.42982	3.18763	0.985336	-0.105654			ENSSSCG00000012026	99	65	3.12253	2.11038	0.973337	-0.610463
ENSSSCG00000015786	24	27	2.49999	3.18771	0.989639	0.350588			ENSSSCG00000023975	50	96	3.12255	5.66608	0.665053	0.917854
ENSSSCG00000003361	17	32	2.00234	3.18815	0.932117	0.671084			ENSSSCG00000017864	84	93	3.12761	3.47537	0.998237	0.134767
ENSSSCG00000007115	221	98	7.50104	3.18906	0.000107954	-1.23393			ENSSSCG00000010728	69	72	3.1281	3.22762	0.998471	0.0500884
ENSSSCG00000005391	40	40	3.15726	3.18912	0.989113	0.014458			ENSSSCG00000002274	73	112	3.13132	4.76521	0.968389	0.600623
ENSSSCG00000005911	76	77	3.38021	3.18931	0.988055	-0.0838688			ENSSSCG00000025121	19	17	3.13395	2.81074	0.998819	-0.162641
ENSSSCG00000004931	255	170	4.96593	3.19178	0.611727	-0.637685			ENSSSCG00000029417	20	15	3.13753	2.49846	0.998437	-0.403801
ENSSSCG00000010259	112	144	2.57157	3.1955	0.962168	0.313375			ENSSSCG00000011304	145	142	3.13864	3.51561	0.998522	-0.0405448
ENSSSCG00000010735	51	61	2.78125	3.19748	0.983724	0.201185			ENSSSCG00000021361	63	75	3.13954	3.58153	0.997788	0.237653
ENSSSCG00000030083	17	11	4.53041	3.19829	0.986283	-0.502333			ENSSSCG00000014951	42	27	3.14525	2.14003	0.993966	-0.630422
ENSSSCG00000012182	14	22	1.38057	3.19849	0.981334	1.2121			ENSSSCG00000016767	4	8	3.14701	4.98708	0.998629	0.847256
ENSSSCG00000010698	108	34	11.1511	3.20119	2.55315e-05	-1.8005			ENSSSCG00000022794	38	52	3.14826	3.8215	0.996519	0.432723
ENSSSCG00000001639	164	174	3.05367	3.20597	0.988222	0.0702161			ENSSSCG00000001948	56	60	3.1487	3.87329	0.998457	0.0874763
ENSSSCG00000005776	29	19	4.73624	3.20727	0.976843	-0.562371			ENSSSCG00000006247	36	27	3.151	2.30913	0.997597	-0.413241
ENSSSCG00000005597	89	76	3.55994	3.21125	0.982994	-0.148679			ENSSSCG00000009426	47	44	3.15205	3.06994	0.998503	-0.103671
ENSSSCG00000021029	25	19	4.11803	3.21171	0.986948	-0.358607			ENSSSCG00000010831	56	39	3.15225	2.25862	0.994403	-0.52209
ENSSSCG00000026971	4	8	1.41535	3.21284	0.990277	1.18262			ENSSSCG00000030467	45	47	3.15533	3.59144	0.998559	0.0510499
ENSSSCG00000027697	12	9	4.24584	3.21364	0.991697	-0.401846			ENSSSCG00000022348	27	22	3.1564	2.51779	0.998429	-0.294768
ENSSSCG00000017592	102	63	4.43437	3.2152	0.759323	-0.46383			ENSSSCG00000029492	60	73	3.15693	4.20187	0.997581	0.268486
ENSSSCG00000013550	56	31	5.67349	3.21569	0.823423	-0.819106			ENSSSCG00000023529	26	30	3.15866	3.44711	0.998573	0.189452
ENSSSCG00000016020	18	14	3.55612	3.22029	0.989845	-0.143101			ENSSSCG00000016720	22	27	3.15896	3.53952	0.998481	0.274264
ENSSSCG00000010902	27	37	2.58846	3.2203	0.980234	0.315079			ENSSSCG00000014380	67	81	3.16237	3.64687	0.997539	0.259809
ENSSSCG00000029860	59	45	3.86945	3.22042	0.976286	-0.264907			ENSSSCG00000029880	38	27	3.16461	2.20037	0.996849	-0.489326
ENSSSCG00000028526	32	17	5.63107	3.22169	0.932117	-0.805595			ENSSSCG00000011497	174	213	3.16534	4.09251	0.995879	0.279757
ENSSSCG00000000086	22	24	3.23544	3.22431	0.990359	-0.0049581			ENSSSCG00000028195	25	29	3.16629	3.71745	0.99858	0.196639
ENSSSCG00000010173	82	90	2.68732	3.22472	0.986441	0.263008			ENSSSCG00000023865	89	103	3.1693	3.86802	0.997855	0.198182
ENSSSCG00000001431	24	31	2.45985	3.22772	0.985626	0.391907			ENSSSCG00000027052	60	51	3.17017	2.88253	0.997951	-0.241031
ENSSSCG00000028581	21	26	2.35873	3.22987	0.988231	0.453498			ENSSSCG00000000751	49	43	3.17579	3.06539	0.998283	-0.195112
ENSSSCG00000017534	37	45	2.95864	3.23397	0.985001	0.128405			ENSSSCG00000017510	86	111	3.17609	3.96126	0.995323	0.354104
ENSSSCG00000011182	37	40	2.80767	3.23643	0.988684	0.205001			ENSSSCG00000015811	22	25	3.17727	3.63611	0.998693	0.167107
ENSSSCG00000023001	85	106	2.54122	3.2375	0.9745	0.34937			ENSSSCG00000013858	35	25	3.17785	2.43776	0.997165	-0.480796
ENSSSCG00000007026	23	33	2.12104	3.24069	0.978875	0.611561			ENSSSCG00000027061	46	71	3.17789	4.66311	0.987201	0.605551
ENSSSCG00000016087	28	28	2.75398	3.24283	0.990108	0.235711			ENSSSCG00000030660	70	64	3.17881	3.33846	0.998299	-0.138001
ENSSSCG00000006492	2	8	0.820385	3.24349	0.974436	1.98315			ENSSSCG00000026564	33	26	3.17938	2.7902	0.998083	-0.343601
ENSSSCG00000029992	22	15	4.6838	3.24751	0.984591	-0.52835			ENSSSCG00000021732	37	50	3.18014	4.6389	0.996857	0.414704
ENSSSCG00000008179	98	106	2.72511	3.24804	0.986862	0.253242			ENSSSCG00000030139	51	76	3.18032	4.60199	0.989454	0.556441
ENSSSCG00000029906	56	53	3.4355	3.24979	0.988086	-0.0801691			ENSSSCG00000006972	16	22	3.18052	4.6735	0.998281	0.427393
ENSSSCG00000002005	116	114	3.42235	3.25208	0.988197	-0.0736368			ENSSSCG00000010794	86	73	3.18089	2.96079	0.997608	-0.2442
ENSSSCG00000017502	83	72	3.78865	3.25415	0.984312	-0.2194			ENSSSCG00000021924	18	18	3.18093	3.01979	0.998886	-0.0101212
ENSSSCG00000010242	3	15	0.600203	3.25592	0.758706	2.43954			ENSSSCG00000006101	44	41	3.18391	3.42755	0.998517	-0.110101
ENSSSCG00000021986	105	96	3.69992	3.25627	0.986456	-0.184253			ENSSSCG00000021854	65	58	3.1881	2.99718	0.998211	-0.172405
ENSSSCG00000023376	95	72	4.22548	3.25693	0.964655	-0.375623			ENSSSCG00000007873	80	108	3.18858	4.19677	0.993112	0.418089
ENSSSCG00000021372	24	30	2.47905	3.25705	0.987002	0.393772			ENSSSCG00000025245	68	73	3.18906	3.07909	0.998409	0.0905123
ENSSSCG00000021495	49	24	5.84875	3.25794	0.709793	-0.844198			ENSSSCG00000030831	30	48	3.19146	4.87482	0.991869	0.651232
ENSSSCG00000028376	1	8	0.388741	3.25938	0.939837	3.06788			ENSSSCG00000009408	73	96	3.19179	4.21597	0.995178	0.380229
ENSSSCG00000009320	14	90	0.516752	3.25955	1.45531e-09	2.65702			ENSSSCG00000015334	63	49	3.19565	2.84776	0.996801	-0.36702
ENSSSCG00000008151	75	80	3.11986	3.25988	0.987381	0.0633279			ENSSSCG00000027997	8	5	3.19965	2.07871	0.998924	-0.59942
ENSSSCG00000007914	42	41	3.47879	3.26137	0.988969	-0.0930983			ENSSSCG00000017993	31	54	3.20295	5.15702	0.980135	0.772175
ENSSSCG00000006231	211	292	2.38387	3.26312	0.854585	0.452919			ENSSSCG00000008816	72	54	3.20442	2.68345	0.995454	-0.41937
ENSSSCG00000014385	95	88	3.69288	3.2657	0.98695	-0.177362			ENSSSCG00000029305	67	56	3.20464	2.57259	0.997693	-0.265323
ENSSSCG00000022773	19	21	3.07351	3.26652	0.990762	0.0878632			ENSSSCG00000013715	71	55	3.20484	2.78285	0.996385	-0.373428
ENSSSCG00000012556	79	87	2.44336	3.26656	0.986361	0.4189			ENSSSCG00000003979	21	15	3.20591	2.58442	0.998194	-0.471128
ENSSSCG00000023657	13	27	1.67985	3.2673	0.92479	0.959724			ENSSSCG00000004411	84	86	3.20594	3.48478	0.998479	0.0230464
ENSSSCG00000004120	100	99	2.95332	3.273	0.988092	0.148286			ENSSSCG00000007583	22	31	3.20956	4.15107	0.997568	0.467302
ENSSSCG00000029413	101	80	4.12039	3.27445	0.972999	-0.33151			ENSSSCG00000005725	51	52	3.211	3.16516	0.998548	0.0170572
ENSSSCG00000009870	89	38	7.65145	3.27445	0.0286776	-1.22447			ENSSSCG00000001582	84	92	3.21404	3.38626	0.998295	0.119327
ENSSSCG00000000050	39	33	3.88238	3.27696	0.986962	-0.244573			ENSSSCG00000010003	88	104	3.21421	3.64737	0.997599	0.228127
ENSSSCG00000026746	59	43	3.85635	3.28116	0.969835	-0.233031			ENSSSCG00000007738	45	54	3.21505	3.8239	0.998013	0.24768
ENSSSCG00000000950	99	149	2.16451	3.28466	0.791098	0.601728			ENSSSCG00000006069	62	57	3.21507	3.40578	0.99836	-0.129908
ENSSSCG00000020672	42	60	2.11833	3.28507	0.96105	0.63303			ENSSSCG00000024721	102	78	3.2154	2.6921	0.994428	-0.39353
ENSSSCG00000006988	10	22	1.55897	3.28697	0.939575	1.07615			ENSSSCG00000022466	23	21	3.21705	2.69676	0.998755	-0.136096
ENSSSCG00000010871	34	27	3.68133	3.28785	0.985775	-0.163049			ENSSSCG00000004671	63	63	3.21875	3.19895	0.998511	-0.0104914
ENSSSCG00000029492	53	54	2.97274	3.28835	0.988447	0.145612			ENSSSCG00000007340	114	116	3.22055	3.38365	0.998502	0.0143272
ENSSSCG00000017535	9	25	1.41011	3.28852	0.784052	1.22163			ENSSSCG00000009070	18	13	3.22062	2.6704	0.998431	-0.452352
ENSSSCG00000030128	5	15	1.29285	3.28866	0.933868	1.34691			ENSSSCG00000008624	147	146	3.2212	3.19641	0.998549	-0.020365
ENSSSCG00000002305	97	104	2.93593	3.28955	0.987139	0.164109			ENSSSCG00000004135	72	76	3.22135	3.74773	0.998444	0.0665139
ENSSSCG00000012267	106	112	3.02554	3.29142	0.987561	0.121528			ENSSSCG00000027889	44	27	3.23032	2.07227	0.99125	-0.696112
ENSSSCG00000026045	80	64	3.84034	3.29218	0.977544	-0.222167			ENSSSCG00000003461	37	27	3.2308	2.55585	0.997262	-0.451785
ENSSSCG00000000604	21	38	1.80679	3.29235	0.92193	0.865703			ENSSSCG00000012818	18	24	3.23201	4.0595	0.998301	0.386921
ENSSSCG00000025475	29	11	7.3691	3.29333	0.73286	-1.16195			ENSSSCG00000020811	9	5	3.23278	1.72256	0.998628	-0.752518
ENSSSCG00000004608	12	15	2.01787	3.29343	0.991175	0.706723			ENSSSCG00000012295	37	55	3.23292	4.97432	0.993833	0.549787
ENSSSCG00000026503	36	49	2.36445	3.29648	0.975533	0.4794			ENSSSCG00000022194	15	14	3.23512	2.98006	0.998943	-0.103499
ENSSSCG00000015871	84	89	3.082	3.305	0.987456	0.100783			ENSSSCG00000000220	37	53	3.23591	4.20947	0.995379	0.497262
ENSSSCG00000016532	85	92	3.10676	3.30888	0.986889	0.0909223			ENSSSCG00000005297	91	107	3.23665	3.74174	0.997645	0.220928
ENSSSCG00000004958	34	31	3.24751	3.30907	0.989056	0.0271094			ENSSSCG00000029460	73	63	3.23771	2.79762	0.997916	-0.220152
ENSSSCG00000022292	61	61	2.90963	3.30921	0.988287	0.185662			ENSSSCG00000008773	80	71	3.23817	3.18737	0.99808	-0.180585
ENSSSCG00000026231	18	25	2.53041	3.31172	0.985093	0.388207			ENSSSCG00000022459	20	10	3.23927	1.85359	0.99479	-0.946879
ENSSSCG00000005132	14	11	4.49477	3.31205	0.991343	-0.440511			ENSSSCG00000008386	18	16	3.24267	3.15584	0.998837	-0.171132
ENSSSCG00000007568	105	93	3.84136	3.31363	0.98492	-0.213233			ENSSSCG00000025140	119	99	3.24418	3.11321	0.996881	-0.273745
ENSSSCG00000024526	33	23	4.10403	3.31363	0.978875	-0.308631			ENSSSCG00000027944	8	15	3.24537	5.57495	0.997461	0.824838
ENSSSCG00000029288	14	31	1.48042	3.3176	0.857317	1.16415			ENSSSCG00000015540	39	44	3.25062	3.90181	0.998434	0.159772
ENSSSCG00000027928	84	70	4.10306	3.31777	0.981344	-0.306487			ENSSSCG00000028391	41	46	3.25064	3.44334	0.99843	0.152085
ENSSSCG00000006059	10	34	1.1946	3.31822	0.19897	1.47387			ENSSSCG00000016878	79	60	3.25266	2.72262	0.995438	-0.402056
ENSSSCG00000012660	10	8	2.49485	3.32175	0.992919	0.412983			ENSSSCG00000024018	60	73	3.25375	3.58698	0.997581	0.268486
ENSSSCG00000012035	148	140	3.29809	3.32301	0.987941	0.0108512			ENSSSCG00000012409	31	23	3.25396	2.23133	0.997788	-0.426291
ENSSSCG00000007967	72	72	3.57661	3.32522	0.988118	-0.105148			ENSSSCG00000001405	23	28	3.25458	3.5813	0.998478	0.26342
ENSSSCG00000014328	79	56	4.79653	3.32866	0.951196	-0.527023			ENSSSCG00000021257	50	57	3.25502	3.39355	0.998268	0.175312
ENSSSCG00000010935	54	45	3.69301	3.33026	0.98436	-0.149141			ENSSSCG00000011936	54	75	3.25808	4.5834	0.994281	0.456544
ENSSSCG00000008613	35	53	1.94099	3.33108	0.952182	0.779199			ENSSSCG00000015345	23	14	3.2582	2.01555	0.996797	-0.690508
ENSSSCG00000030599	11	5	6.13253	3.33281	0.983086	-0.879741			ENSSSCG00000008555	44	65	3.26467	4.63114	0.992415	0.542738
ENSSSCG00000017697	28	22	3.88577	3.33407	0.986993	-0.220914			ENSSSCG00000008892	43	41	3.26558	3.61467	0.998562	-0.07763
ENSSSCG00000014562	72	90	2.82864	3.33441	0.976126	0.237339			ENSSSCG00000005900	50	47	3.26919	2.83612	0.998491	-0.0980224
ENSSSCG00000003764	55	36	4.34739	3.33627	0.946708	-0.381904			ENSSSCG00000005576	22	16	3.27051	2.55358	0.998208	-0.447665
ENSSSCG00000028195	46	25	5.91553	3.33826	0.870571	-0.825387			ENSSSCG00000017793	56	70	3.2715	3.97624	0.99729	0.306689
ENSSSCG00000026189	17	17	2.89864	3.33916	0.991673	0.204146			ENSSSCG00000016092	82	58	3.27153	2.74014	0.99143	-0.503355
ENSSSCG00000011361	90	68	4.40339	3.34578	0.965345	-0.396267			ENSSSCG00000011679	155	130	3.27474	3.1859	0.996731	-0.26267
ENSSSCG00000005016	49	47	3.0363	3.34589	0.98851	0.14008			ENSSSCG00000026971	10	4	3.27482	1.37072	0.997265	-1.15692
ENSSSCG00000030142	18	16	3.89409	3.3463	0.991229	-0.218723			ENSSSCG00000030428	89	71	3.27744	2.73799	0.996451	-0.332709
ENSSSCG00000012574	91	82	3.4096	3.34802	0.985993	-0.026303			ENSSSCG00000026658	49	31	3.27936	2.0613	0.991276	-0.655294
ENSSSCG00000007814	25	32	2.81934	3.34893	0.985681	0.24835			ENSSSCG00000004750	14	16	3.27954	3.64778	0.998892	0.171284
ENSSSCG00000009781	152	243	2.23682	3.35123	0.321536	0.583242			ENSSSCG00000026445	21	20	3.28223	3.09506	0.998822	-0.0774981
ENSSSCG00000002395	14	22	2.23736	3.35487	0.981334	0.584447			ENSSSCG00000002738	39	47	3.28251	4.49917	0.998107	0.253003
ENSSSCG00000024734	52	32	5.0888	3.35763	0.926995	-0.599895			ENSSSCG00000030084	14	8	3.28288	1.89081	0.997931	-0.750874
ENSSSCG00000027375	16	11	4.40159	3.35898	0.988492	-0.389996			ENSSSCG00000006206	72	47	3.28451	2.55258	0.985705	-0.616001
ENSSSCG00000027590	43	70	2.11787	3.35946	0.873767	0.665612			ENSSSCG00000016099	16	13	3.28502	2.83338	0.99879	-0.291279
ENSSSCG00000010974	88	62	5.19403	3.3607	0.942067	-0.628084			ENSSSCG00000012557	28	31	3.28784	4.83544	0.998633	0.132001
ENSSSCG00000023675	39	51	2.69785	3.364	0.978934	0.318341			ENSSSCG00000001977	13	24	3.28805	6.20434	0.995029	0.829341
ENSSSCG00000024556	89	75	3.81469	3.36411	0.98195	-0.181349			ENSSSCG00000006321	45	56	3.29168	3.92607	0.997673	0.299267
ENSSSCG00000000493	34	32	3.20226	3.37116	0.989362	0.0741537			ENSSSCG00000030947	56	66	3.2925	3.73136	0.997979	0.222957
ENSSSCG00000001822	29	50	2.13611	3.37189	0.899323	0.658583			ENSSSCG00000027328	3	9	3.294	8.59045	0.996964	1.32714
ENSSSCG00000015694	63	69	2.67973	3.37318	0.986952	0.332046			ENSSSCG00000030575	22	33	3.29514	4.37318	0.996692	0.554927
ENSSSCG00000006470	71	57	4.39979	3.37386	0.97929	-0.383021			ENSSSCG00000007232	40	57	3.29538	4.32163	0.995107	0.490654
ENSSSCG00000017793	45	62	2.53692	3.37674	0.967618	0.412547			ENSSSCG00000007352	53	61	3.29714	3.97157	0.998184	0.189057
ENSSSCG00000015644	43	50	3.02143	3.37701	0.986165	0.160525			ENSSSCG00000025531	79	86	3.29744	4.03163	0.998332	0.110581
ENSSSCG00000002353	129	114	3.60594	3.37704	0.984552	-0.0946172			ENSSSCG00000017193	62	67	3.29766	3.34374	0.998408	0.0997966
ENSSSCG00000000417	56	52	3.62745	3.37713	0.987799	-0.103191			ENSSSCG00000013455	17	25	3.30196	4.78093	0.997705	0.52193
ENSSSCG00000025433	33	14	7.75746	3.3797	0.7704	-1.1987			ENSSSCG00000022310	116	157	3.30203	4.08424	0.988893	0.423049
ENSSSCG00000027731	7	8	2.66638	3.38164	0.993906	0.342813			ENSSSCG00000011876	47	40	3.30701	3.22017	0.998161	-0.238163
ENSSSCG00000028081	25	27	3.51163	3.38169	0.99001	-0.0543798			ENSSSCG00000002265	58	44	3.30759	2.48326	0.996569	-0.401732
ENSSSCG00000021981	42	33	3.88607	3.38253	0.983324	-0.200233			ENSSSCG00000000063	83	105	3.30804	4.09589	0.996195	0.325292
ENSSSCG00000005442	33	21	4.96095	3.38357	0.969506	-0.552072			ENSSSCG00000023775	22	20	3.31175	3.47597	0.99877	-0.141822
ENSSSCG00000020873	168	137	4.39968	3.38606	0.973279	-0.377781			ENSSSCG00000027277	27	31	3.31227	4.09459	0.998567	0.182748
ENSSSCG00000025357	92	87	3.29627	3.38637	0.987488	0.0389048			ENSSSCG00000023878	28	17	3.31677	2.03946	0.995723	-0.700216
ENSSSCG00000000398	29	37	2.4974	3.38675	0.984466	0.439496			ENSSSCG00000025166	71	80	3.32286	4.25084	0.998179	0.159552
ENSSSCG00000001875	77	58	4.60081	3.38809	0.968754	-0.441408			ENSSSCG00000005585	114	105	3.3252	2.89539	0.998235	-0.128195
ENSSSCG00000003041	79	36	7.51727	3.38879	0.129434	-1.14944			ENSSSCG00000021917	55	63	3.3268	3.5349	0.998193	0.182372
ENSSSCG00000004572	8	36	0.910984	3.39004	0.0220848	1.89576			ENSSSCG00000006842	54	77	3.32751	5.20693	0.992678	0.494048
ENSSSCG00000002532	97	94	3.63845	3.39155	0.9879	-0.101378			ENSSSCG00000024671	94	72	3.3287	2.57326	0.994934	-0.390852
ENSSSCG00000008074	24	5	13.1729	3.39601	0.228716	-1.95566			ENSSSCG00000004120	121	147	3.33112	4.50933	0.996697	0.268277
ENSSSCG00000028000	74	43	5.09921	3.39688	0.778829	-0.586052			ENSSSCG00000007540	95	95	3.33271	3.13515	0.998486	-0.0105434
ENSSSCG00000001865	48	55	2.58756	3.39762	0.986243	0.392901			ENSSSCG00000007991	167	174	3.33672	3.22784	0.998562	0.0483267
ENSSSCG00000015742	18	23	2.8293	3.40089	0.988355	0.265471			ENSSSCG00000014287	92	115	3.33887	3.73602	0.996324	0.30847
ENSSSCG00000027857	143	174	2.37178	3.40126	0.974732	0.520104			ENSSSCG00000030309	28	23	3.33973	2.76841	0.998426	-0.283954
ENSSSCG00000030352	70	67	3.34491	3.40327	0.987872	0.0249712			ENSSSCG00000028792	14	16	3.34015	3.65067	0.998892	0.171284
ENSSSCG00000004813	69	27	7.76039	3.40688	0.0419198	-1.18767			ENSSSCG00000030672	48	59	3.34406	4.02365	0.997727	0.282066
ENSSSCG00000006664	57	65	2.93891	3.40751	0.985751	0.213437			ENSSSCG00000006766	76	67	3.34435	3.07801	0.998058	-0.189993
ENSSSCG00000004309	32	29	3.62303	3.40799	0.989204	-0.0882595			ENSSSCG00000028126	56	79	3.34493	4.79838	0.993068	0.47901
ENSSSCG00000027551	26	27	2.99847	3.40856	0.990197	0.184938			ENSSSCG00000023593	56	75	3.34708	4.24057	0.995629	0.404951
ENSSSCG00000030636	11	11	3.33326	3.41429	0.993013	0.0346387			ENSSSCG00000027706	11	11	3.35339	3.56759	0.999059	-0.00981262
ENSSSCG00000003770	80	48	4.78087	3.41621	0.801927	-0.48489			ENSSSCG00000006732	90	111	3.35364	3.91054	0.996748	0.289204
ENSSSCG00000030801	26	54	1.60391	3.41629	0.597725	1.09085			ENSSSCG00000030827	23	20	3.35867	5.33945	0.99869	-0.203401
ENSSSCG00000007720	107	117	3.23105	3.41659	0.986459	0.080536			ENSSSCG00000021586	81	85	3.36147	3.42402	0.998445	0.058237
ENSSSCG00000003506	118	89	4.64725	3.41684	0.956579	-0.443747			ENSSSCG00000010186	135	153	3.36431	3.893	0.997968	0.168825
ENSSSCG00000020816	3	11	0.888292	3.41889	0.952563	1.94441			ENSSSCG00000025065	28	34	3.36517	3.83043	0.99834	0.26152
ENSSSCG00000025287	40	27	4.33544	3.41972	0.970324	-0.342295			ENSSSCG00000003464	57	78	3.36918	4.78655	0.99466	0.435728
ENSSSCG00000027006	21	27	2.54323	3.42072	0.986983	0.427647			ENSSSCG00000001207	87	83	3.36989	3.40043	0.99841	-0.0776958
ENSSSCG00000000816	68	60	3.51072	3.42232	0.98584	-0.0367925			ENSSSCG00000001716	14	9	3.37353	2.14036	0.998384	-0.597888
ENSSSCG00000003590	318	187	6.12058	3.42336	0.0501907	-0.838243			ENSSSCG00000004037	44	36	3.37562	2.92082	0.997982	-0.293248
ENSSSCG00000027889	39	44	2.93178	3.42583	0.987608	0.224654			ENSSSCG00000011641	14	10	3.37626	2.33306	0.998657	-0.459581
ENSSSCG00000022166	4	13	1.13641	3.42726	0.943954	1.5926			ENSSSCG00000023253	112	95	3.37995	3.30865	0.997339	-0.245913
ENSSSCG00000028408	14	14	3.10217	3.42817	0.992282	0.14416			ENSSSCG00000016672	33	37	3.38021	3.75521	0.998531	0.150384
ENSSSCG00000002390	35	44	2.77107	3.42913	0.983544	0.307371			ENSSSCG00000021828	60	75	3.3807	4.01246	0.997174	0.306991
ENSSSCG00000002793	59	41	5.16957	3.43231	0.96003	-0.590877			ENSSSCG00000003462	26	28	3.38267	3.69111	0.998707	0.0930411
ENSSSCG00000008838	103	85	3.86861	3.43321	0.978889	-0.172258			ENSSSCG00000022980	48	64	3.38724	4.28324	0.996347	0.397656
ENSSSCG00000030143	82	30	7.68742	3.43614	0.00492015	-1.16172			ENSSSCG00000026275	22	26	3.3876	4.11073	0.998602	0.22168
ENSSSCG00000015364	63	52	4.28494	3.43701	0.982686	-0.318112			ENSSSCG00000007563	104	128	3.38816	3.89408	0.996551	0.286585
ENSSSCG00000009127	97	68	4.22918	3.44016	0.932139	-0.297892			ENSSSCG00000013786	61	82	3.39034	4.79723	0.995084	0.410716
ENSSSCG00000004332	68	46	4.79734	3.44127	0.942773	-0.479269			ENSSSCG00000011582	175	189	3.39067	3.59843	0.998428	0.0998702
ENSSSCG00000001596	100	94	3.82441	3.44183	0.987346	-0.15207			ENSSSCG00000018019	101	111	3.3929	3.42596	0.998254	0.124457
ENSSSCG00000020988	61	53	3.84281	3.44189	0.985629	-0.158953			ENSSSCG00000021594	10	10	3.39315	3.5487	0.999091	-0.0097363
ENSSSCG00000011434	58	67	3.00167	3.44274	0.98506	0.197761			ENSSSCG00000004856	75	119	3.39329	5.03248	0.942239	0.648871
ENSSSCG00000015594	22	38	2.08007	3.44346	0.939637	0.727223			ENSSSCG00000017068	24	17	3.39627	2.37589	0.997939	-0.48555
ENSSSCG00000027546	28	23	4.08046	3.44822	0.988146	-0.242902			ENSSSCG00000005286	54	46	3.39817	3.24188	0.998055	-0.237509
ENSSSCG00000015019	18	16	3.87582	3.45111	0.991229	-0.167438			ENSSSCG00000022256	13	16	3.39852	3.82866	0.998815	0.271288
ENSSSCG00000025106	68	67	3.43289	3.45206	0.988139	0.00804642			ENSSSCG00000003986	45	31	3.39912	2.55378	0.995523	-0.53483
ENSSSCG00000022260	11	13	2.98992	3.45255	0.992193	0.207586			ENSSSCG00000020904	11	10	3.39958	3.21446	0.999051	-0.136013
ENSSSCG00000003428	261	198	4.7254	3.45692	0.93152	-0.450958			ENSSSCG00000022171	16	23	3.39999	5.2688	0.998008	0.488953
ENSSSCG00000005930	92	105	3.3059	3.45826	0.984252	0.0650199			ENSSSCG00000014074	67	53	3.40183	2.93527	0.996952	-0.343411
ENSSSCG00000000110	117	92	4.58062	3.46009	0.969194	-0.404723			ENSSSCG00000017601	45	65	3.40424	5.12206	0.99361	0.510982
ENSSSCG00000021753	38	39	3.77255	3.46266	0.989153	-0.123662			ENSSSCG00000016566	62	95	3.40607	5.4676	0.978421	0.597674
ENSSSCG00000023470	10	3	8.89782	3.46721	0.968627	-1.35968			ENSSSCG00000018014	100	107	3.40741	3.56764	0.998383	0.0861839
ENSSSCG00000003072	46	36	3.92654	3.46999	0.982097	-0.178308			ENSSSCG00000024470	58	75	3.4084	4.66049	0.996542	0.35514
ENSSSCG00000015335	74	66	3.79884	3.47036	0.986009	-0.130442			ENSSSCG00000028382	69	58	3.40842	2.86267	0.997719	-0.257379
ENSSSCG00000026266	12	11	3.89066	3.4705	0.992741	-0.164886			ENSSSCG00000025240	49	34	3.40951	2.53775	0.995205	-0.525775
ENSSSCG00000001513	154	148	3.82512	3.47157	0.988418	-0.139897			ENSSSCG00000003705	99	99	3.41125	3.39793	0.998488	-0.0105476
ENSSSCG00000016345	53	51	3.32469	3.47256	0.988368	0.0627921			ENSSSCG00000012676	103	103	3.41151	4.55658	0.998491	-0.0105514
ENSSSCG00000030631	17	15	3.76754	3.47466	0.991402	-0.116719			ENSSSCG00000006302	38	41	3.41153	3.67361	0.998562	0.096685
ENSSSCG00000004612	49	60	2.48793	3.47603	0.982349	0.4825			ENSSSCG00000028757	38	29	3.41291	2.9511	0.99765	-0.38958
ENSSSCG00000009402	13	10	3.88953	3.47753	0.991517	-0.161534			ENSSSCG00000027664	38	70	3.41295	5.86293	0.928	0.854971
ENSSSCG00000009283	58	94	2.23368	3.47796	0.790351	0.638822			ENSSSCG00000004799	49	45	3.41299	3.6186	0.998443	-0.130895
ENSSSCG00000007797	129	125	3.55718	3.47892	0.988197	-0.0321109			ENSSSCG00000028301	52	52	3.42152	3.21767	0.998547	-0.0104591
ENSSSCG00000025008	60	100	1.96083	3.48053	0.697643	0.827852			ENSSSCG00000000050	33	52	3.42174	5.29935	0.991553	0.631032
ENSSSCG00000028391	45	50	3.40679	3.48244	0.987488	0.0316647			ENSSSCG00000029517	45	31	3.42367	2.60617	0.995523	-0.53483
ENSSSCG00000015853	120	128	3.12459	3.48333	0.987434	0.156783			ENSSSCG00000016073	31	27	3.42851	3.45282	0.998528	-0.203374
ENSSSCG00000007944	77	132	2.2418	3.48825	0.41109	0.637867			ENSSSCG00000013145	178	203	3.43231	3.79991	0.997879	0.178078
ENSSSCG00000002922	30	26	4.59188	3.49177	0.988832	-0.39512			ENSSSCG00000017143	138	142	3.43559	3.26605	0.998528	0.0303724
ENSSSCG00000016073	29	24	3.65044	3.49549	0.988104	-0.0625557			ENSSSCG00000024759	36	42	3.43868	3.85151	0.998346	0.206766
ENSSSCG00000017533	37	37	3.76986	3.49573	0.989314	-0.108945			ENSSSCG00000007801	85	79	3.44096	3.08022	0.99832	-0.114945
ENSSSCG00000007958	70	63	3.85931	3.49593	0.986481	-0.142675			ENSSSCG00000017811	3	13	3.44303	11.993	0.982657	1.81509
ENSSSCG00000015001	66	58	3.80326	3.49831	0.985781	-0.120598			ENSSSCG00000001731	54	41	3.44624	2.98055	0.996795	-0.400004
ENSSSCG00000003926	162	85	7.0152	3.49873	0.0435443	-1.00367			ENSSSCG00000015819	106	101	3.44835	3.51239	0.9984	-0.079636
ENSSSCG00000017506	89	46	6.76217	3.5028	0.3218	-0.948984			ENSSSCG00000017252	30	19	3.44955	2.21953	0.996064	-0.644157
ENSSSCG00000016869	20	27	2.23423	3.50527	0.98532	0.64978			ENSSSCG00000001076	107	82	3.45022	2.88593	0.994267	-0.390648
ENSSSCG00000025977	72	59	4.036	3.50719	0.981058	-0.202606			ENSSSCG00000002294	17	16	3.45451	3.63743	0.998898	-0.0928423
ENSSSCG00000023593	38	65	2.15424	3.50979	0.83837	0.704237			ENSSSCG00000000167	52	48	3.45554	3.32068	0.998435	-0.123805
ENSSSCG00000013079	191	218	3.40539	3.5106	0.984228	0.0438934			ENSSSCG00000026101	20	34	3.45555	6.17743	0.993713	0.728472
ENSSSCG00000006302	39	40	3.44948	3.51154	0.989089	0.0257002			ENSSSCG00000027288	47	61	3.45615	4.40491	0.99699	0.359208
ENSSSCG00000010826	16	28	1.96867	3.5116	0.96202	0.834885			ENSSSCG00000008792	161	139	3.45983	3.49987	0.99739	-0.221238
ENSSSCG00000002502	132	122	3.48096	3.51789	0.98697	0.0152127			ENSSSCG00000004529	48	36	3.46326	2.89157	0.996929	-0.416283
ENSSSCG00000013235	97	119	2.82611	3.51829	0.975987	0.316066			ENSSSCG00000005235	89	127	3.46343	5.18463	0.983966	0.497901
ENSSSCG00000013277	10	13	2.76515	3.51999	0.991517	0.348192			ENSSSCG00000009365	11	10	3.46622	3.46308	0.999051	-0.136013
ENSSSCG00000015286	136	145	3.18865	3.52019	0.98764	0.142689			ENSSSCG00000005320	89	129	3.46658	5.00075	0.979853	0.520279
ENSSSCG00000028359	40	55	2.51669	3.52295	0.971426	0.485271			ENSSSCG00000026141	98	125	3.46679	4.1758	0.995379	0.337567
ENSSSCG00000004004	32	29	3.72102	3.52501	0.989204	-0.0780671			ENSSSCG00000002431	60	40	3.4681	2.36402	0.991482	-0.584373
ENSSSCG00000000003	107	72	5.41375	3.52913	0.886747	-0.617341			ENSSSCG00000028529	16	37	3.46897	7.45611	0.946664	1.15327
ENSSSCG00000022348	23	31	2.62322	3.53069	0.983782	0.428626			ENSSSCG00000030154	78	91	3.47028	4.81939	0.997843	0.209418
ENSSSCG00000029943	33	26	3.81976	3.5325	0.985731	-0.112808			ENSSSCG00000028366	33	32	3.47263	3.01667	0.998665	-0.0535009
ENSSSCG00000023539	149	96	5.00917	3.53328	0.706925	-0.503564			ENSSSCG00000012688	11	19	3.47381	6.07491	0.997235	0.730095
ENSSSCG00000005089	148	87	5.96878	3.53333	0.357833	-0.756425			ENSSSCG00000015111	128	125	3.47617	3.16622	0.998489	-0.0445335
ENSSSCG00000002831	58	87	2.6435	3.53424	0.90882	0.418934			ENSSSCG00000010477	62	38	3.47655	2.38569	0.981651	-0.703226
ENSSSCG00000010893	63	55	3.71682	3.53514	0.985691	-0.07231			ENSSSCG00000015031	21	13	3.47688	2.39305	0.997302	-0.664561
ENSSSCG00000010148	25	17	4.54965	3.53738	0.982492	-0.363082			ENSSSCG00000023448	43	43	3.47799	3.36163	0.998594	-0.0104205
ENSSSCG00000015772	51	41	3.99167	3.54168	0.982765	-0.172561			ENSSSCG00000011195	86	103	3.47865	4.10096	0.997414	0.247129
ENSSSCG00000027524	69	48	5.18914	3.54464	0.952225	-0.549862			ENSSSCG00000025434	36	28	3.48228	3.06925	0.997887	-0.362507
ENSSSCG00000029109	56	51	3.46796	3.54599	0.987407	0.0320886			ENSSSCG00000004494	152	147	3.48431	3.60822	0.998501	-0.058536
ENSSSCG00000003627	86	82	3.44014	3.54626	0.987661	0.0438641			ENSSSCG00000004490	135	170	3.48463	4.4856	0.994966	0.319948
ENSSSCG00000014580	21	37	2.0815	3.5488	0.936007	0.769708			ENSSSCG00000014959	67	57	3.48612	3.08286	0.997862	-0.240206
ENSSSCG00000013758	123	201	2.31769	3.54949	0.327022	0.614922			ENSSSCG00000006923	53	57	3.48617	3.99597	0.998462	0.0927433
ENSSSCG00000029033	29	23	4.49354	3.54981	0.986999	-0.340102			ENSSSCG00000002749	35	28	3.48632	2.66114	0.9981	-0.322905
ENSSSCG00000007873	97	96	3.69818	3.55047	0.988072	-0.058801			ENSSSCG00000013765	11	26	3.48907	7.83873	0.981284	1.1642
ENSSSCG00000023483	210	235	3.42679	3.55419	0.986255	0.0526629			ENSSSCG00000012027	97	129	3.4915	4.54836	0.992805	0.397333
ENSSSCG00000010026	57	70	2.93129	3.55745	0.980761	0.279323			ENSSSCG00000004917	47	34	3.49187	2.82191	0.996387	-0.4668
ENSSSCG00000001582	95	104	3.42239	3.56081	0.986424	0.057193			ENSSSCG00000014892	51	49	3.49315	3.07382	0.998522	-0.0671067
ENSSSCG00000002265	39	65	2.17894	3.56295	0.867885	0.709492			ENSSSCG00000030485	77	86	3.49393	3.41396	0.998207	0.147139
ENSSSCG00000026739	13	18	2.28481	3.56371	0.988499	0.641308			ENSSSCG00000011361	70	82	3.49411	4.10883	0.997873	0.214965
ENSSSCG00000030274	26	22	3.26878	3.56554	0.989126	0.125343			ENSSSCG00000030636	12	7	3.49637	2.03519	0.99832	-0.714569
ENSSSCG00000015492	48	42	3.67969	3.5661	0.986912	-0.045241			ENSSSCG00000023880	189	181	3.49684	3.27466	0.998533	-0.0726761
ENSSSCG00000030529	46	27	5.57604	3.56678	0.920683	-0.6446			ENSSSCG00000030018	53	46	3.49783	3.11092	0.99818	-0.211004
ENSSSCG00000012532	34	21	6.35318	3.56729	0.963666	-0.832651			ENSSSCG00000015644	49	39	3.49868	2.7203	0.997614	-0.332816
ENSSSCG00000004812	290	318	3.133	3.56949	0.988964	0.188177			ENSSSCG00000008589	48	37	3.50024	2.84868	0.9973	-0.377746
ENSSSCG00000015022	41	58	2.52989	3.56993	0.964645	0.496803			ENSSSCG00000012556	129	101	3.50365	3.27397	0.994438	-0.360699
ENSSSCG00000004761	43	58	2.66646	3.57405	0.972938	0.422633			ENSSSCG00000010396	90	76	3.50401	3.13703	0.997495	-0.251722
ENSSSCG00000007618	89	68	4.59313	3.57443	0.96821	-0.361767			ENSSSCG00000012742	99	108	3.50522	4.07846	0.998297	0.113853
ENSSSCG00000010011	55	61	3.27128	3.57458	0.986909	0.127918			ENSSSCG00000014132	16	20	3.50727	4.74516	0.998651	0.295784
ENSSSCG00000025460	153	172	3.30873	3.57548	0.98515	0.111881			ENSSSCG00000022131	54	41	3.50776	3.05049	0.996795	-0.400004
ENSSSCG00000016919	22	24	2.90451	3.57579	0.990359	0.299976			ENSSSCG00000030110	70	97	3.50999	4.60792	0.992236	0.454797
ENSSSCG00000005338	91	72	4.12641	3.57768	0.974322	-0.205851			ENSSSCG00000028753	31	34	3.51266	3.7759	0.998609	0.119184
ENSSSCG00000013869	250	188	4.92006	3.57852	0.924826	-0.459333			ENSSSCG00000011837	45	59	3.51411	5.13132	0.996904	0.373345
ENSSSCG00000021567	24	17	4.69093	3.58118	0.984952	-0.389422			ENSSSCG00000004125	51	60	3.51448	4.15227	0.998062	0.220092
ENSSSCG00000010027	120	129	3.62772	3.58427	0.987186	-0.0173638			ENSSSCG00000030147	11	10	3.51495	3.61343	0.999051	-0.136013
ENSSSCG00000021688	7	9	2.50266	3.58549	0.993192	0.518689			ENSSSCG00000003018	91	116	3.51552	4.22803	0.995652	0.336468
ENSSSCG00000014875	123	153	3.04328	3.59282	0.97078	0.239472			ENSSSCG00000008593	152	186	3.5162	4.22942	0.996108	0.279029
ENSSSCG00000005370	42	44	3.28712	3.59401	0.988731	0.128775			ENSSSCG00000009774	14	18	3.51674	4.54435	0.998668	0.332295
ENSSSCG00000027843	28	32	3.12739	3.59542	0.988701	0.201189			ENSSSCG00000006580	12	12	3.51846	3.50636	0.999029	-0.00987715
ENSSSCG00000028662	34	55	2.35937	3.59622	0.921976	0.608053			ENSSSCG00000020657	77	137	3.52135	5.79642	0.58111	0.813093
ENSSSCG00000004387	96	99	3.79394	3.59674	0.987917	-0.0770078			ENSSSCG00000017293	83	87	3.5224	3.8502	0.998446	0.0566332
ENSSSCG00000010325	50	54	3.18583	3.5986	0.987838	0.17578			ENSSSCG00000027170	24	6	3.52735	0.958175	0.810374	-1.85584
ENSSSCG00000026290	51	35	4.60712	3.60006	0.963736	-0.355822			ENSSSCG00000028981	46	30	3.53003	2.62782	0.993602	-0.611794
ENSSSCG00000011630	35	28	4.09106	3.60135	0.985815	-0.183931			ENSSSCG00000023179	19	28	3.53265	5.55463	0.997417	0.527273
ENSSSCG00000003663	14	18	2.94841	3.60198	0.989845	0.288866			ENSSSCG00000023725	9	6	3.53355	2.2776	0.99891	-0.528013
ENSSSCG00000028686	21	16	3.73279	3.60371	0.988428	-0.0507793			ENSSSCG00000002347	12	9	3.53531	2.8128	0.998859	-0.390428
ENSSSCG00000016043	50	38	3.95868	3.60596	0.978671	-0.134627			ENSSSCG00000022850	114	147	3.53646	4.45854	0.994151	0.353573
ENSSSCG00000012504	93	56	5.42869	3.61198	0.743863	-0.587809			ENSSSCG00000000754	48	46	3.53719	3.52179	0.998535	-0.0706411
ENSSSCG00000008668	74	42	5.65728	3.61511	0.733301	-0.646078			ENSSSCG00000004395	4	11	3.53837	8.80326	0.996232	1.26475
ENSSSCG00000015556	261	151	6.05623	3.61547	0.0603838	-0.744218			ENSSSCG00000009076	76	81	3.53977	4.34811	0.998413	0.0803174
ENSSSCG00000000285	36	41	3.261	3.6155	0.987684	0.148881			ENSSSCG00000023078	72	89	3.53998	4.11154	0.997075	0.291745
ENSSSCG00000021112	51	55	3.10631	3.61995	0.987817	0.220793			ENSSSCG00000017539	40	49	3.54012	3.95471	0.997962	0.276287
ENSSSCG00000023842	45	46	3.02716	3.62231	0.988761	0.258922			ENSSSCG00000000739	103	103	3.54034	3.40498	0.998491	-0.0105514
ENSSSCG00000021529	26	36	2.71848	3.62308	0.979938	0.414414			ENSSSCG00000030363	118	130	3.54081	3.72748	0.998232	0.128109
ENSSSCG00000012944	43	64	3.08905	3.62389	0.94467	0.230357			ENSSSCG00000013433	39	38	3.54254	3.19498	0.998614	-0.0469801
ENSSSCG00000015261	92	82	4.11011	3.62403	0.985481	-0.181591			ENSSSCG00000025906	12	16	3.54304	4.57428	0.998683	0.378744
ENSSSCG00000025353	36	27	4.63693	3.62416	0.982451	-0.355498			ENSSSCG00000000619	127	123	3.54309	3.50579	0.998467	-0.0563952
ENSSSCG00000013430	68	69	3.96736	3.62589	0.988126	-0.129855			ENSSSCG00000020961	57	35	3.54406	2.485	0.985101	-0.699459
ENSSSCG00000027315	13	66	0.807329	3.62611	8.74026e-06	2.16724			ENSSSCG00000009703	51	55	3.54475	3.69798	0.998466	0.0965807
ENSSSCG00000006239	19	24	2.73234	3.62703	0.988314	0.408661			ENSSSCG00000016285	75	78	3.54501	3.52847	0.998467	0.0453811
ENSSSCG00000025994	44	41	3.48025	3.63009	0.988487	0.0607976			ENSSSCG00000022293	30	36	3.54571	4.52843	0.998342	0.245392
ENSSSCG00000029348	93	65	4.73429	3.63113	0.933812	-0.382744			ENSSSCG00000007034	41	37	3.54659	3.25248	0.998473	-0.15502
ENSSSCG00000009578	87	78	4.13808	3.63287	0.985853	-0.187847			ENSSSCG00000006309	21	12	3.54903	2.10836	0.996486	-0.771962
ENSSSCG00000003630	79	92	3.09013	3.63525	0.98326	0.234421			ENSSSCG00000013740	24	33	3.55164	5.06893	0.997645	0.434292
ENSSSCG00000005078	92	70	4.42986	3.64262	0.966464	-0.282306			ENSSSCG00000014967	43	37	3.55266	3.13274	0.99828	-0.222241
ENSSSCG00000025965	23	37	1.97932	3.64424	0.96011	0.880612			ENSSSCG00000029430	117	150	3.55327	4.34689	0.994411	0.345362
ENSSSCG00000025120	71	94	2.48019	3.64531	0.964058	0.555581			ENSSSCG00000025736	129	116	3.55977	3.00192	0.998033	-0.162649
ENSSSCG00000009365	8	9	2.80878	3.64687	0.993581	0.376717			ENSSSCG00000025023	71	87	3.56389	4.12083	0.997258	0.27922
ENSSSCG00000009215	13	21	4.93062	3.64848	0.980806	-0.43446			ENSSSCG00000015962	80	51	3.56423	2.70181	0.977258	-0.65054
ENSSSCG00000012829	27	27	3.56448	3.64909	0.990218	0.033841			ENSSSCG00000006360	163	217	3.57069	4.82982	0.987155	0.400179
ENSSSCG00000004457	178	153	3.84359	3.64914	0.981855	-0.0749175			ENSSSCG00000025194	106	102	3.57087	3.81285	0.99843	-0.0655525
ENSSSCG00000026074	121	84	5.43885	3.65227	0.902135	-0.57451			ENSSSCG00000024749	35	30	3.57242	3.41662	0.998405	-0.226493
ENSSSCG00000025613	262	178	5.05574	3.65249	0.684691	-0.469027			ENSSSCG00000013258	32	31	3.57456	3.59518	0.998675	-0.0548223
ENSSSCG00000021038	76	79	3.26469	3.65445	0.987831	0.162724			ENSSSCG00000010962	21	9	3.57532	1.64691	0.98937	-1.15251
ENSSSCG00000021450	54	54	3.6665	3.65577	0.988473	-0.00421639			ENSSSCG00000005471	54	80	3.58004	5.08627	0.989083	0.548538
ENSSSCG00000005771	26	24	3.82751	3.65808	0.990121	-0.0653079			ENSSSCG00000004720	142	156	3.5808	3.44377	0.998264	0.124227
ENSSSCG00000009379	70	44	5.2378	3.65953	0.895031	-0.517314			ENSSSCG00000021740	61	81	3.58165	4.8165	0.995571	0.393215
ENSSSCG00000004059	17	35	1.86588	3.65984	0.867238	0.971893			ENSSSCG00000011944	14	20	3.58216	5.30294	0.998251	0.477127
ENSSSCG00000006162	45	36	4.05562	3.66367	0.983645	-0.146614			ENSSSCG00000021777	31	40	3.58729	4.77322	0.997828	0.347821
ENSSSCG00000014168	55	51	3.78453	3.66375	0.987817	-0.046762			ENSSSCG00000015414	114	89	3.58893	3.18953	0.994867	-0.36441
ENSSSCG00000005025	83	110	2.70006	3.6638	0.959023	0.440328			ENSSSCG00000010654	77	82	3.59494	4.32686	0.998413	0.0791857
ENSSSCG00000008313	24	20	4.51691	3.66477	0.98929	-0.301599			ENSSSCG00000008315	46	56	3.59693	4.64877	0.99787	0.268195
ENSSSCG00000017952	53	24	7.85141	3.66676	0.472384	-1.09843			ENSSSCG00000018009	41	33	3.59754	3.29253	0.997952	-0.315758
ENSSSCG00000009522	11	6	6.17322	3.67472	0.987852	-0.748392			ENSSSCG00000028725	55	84	3.59795	5.15598	0.983876	0.592103
ENSSSCG00000016613	139	65	7.15086	3.67734	0.00933732	-0.959478			ENSSSCG00000004466	47	43	3.60119	3.70216	0.998449	-0.136137
ENSSSCG00000001788	41	35	4.33165	3.67793	0.986949	-0.236051			ENSSSCG00000005378	89	115	3.60217	4.53469	0.995136	0.35581
ENSSSCG00000001720	66	56	3.94953	3.67798	0.984093	-0.102749			ENSSSCG00000027953	33	43	3.60418	4.15525	0.997632	0.362204
ENSSSCG00000000873	48	55	2.9047	3.67858	0.986243	0.340768			ENSSSCG00000003971	54	64	3.60598	3.94824	0.99796	0.230788
ENSSSCG00000030435	40	40	3.57858	3.6803	0.989113	0.0404281			ENSSSCG00000021753	32	44	3.60676	4.29971	0.996962	0.437826
ENSSSCG00000023975	65	64	3.8318	3.68226	0.988185	-0.0574151			ENSSSCG00000003568	92	123	3.60756	4.56165	0.992772	0.404734
ENSSSCG00000030397	32	33	3.64958	3.68282	0.989604	0.0130647			ENSSSCG00000015985	36	37	3.60931	3.45636	0.998638	0.0281592
ENSSSCG00000023779	11	4	8.42165	3.68305	0.973622	-1.19319			ENSSSCG00000015523	24	16	3.60975	2.59026	0.997522	-0.568301
ENSSSCG00000029895	23	33	2.78462	3.68425	0.978875	0.40392			ENSSSCG00000009015	115	117	3.61625	3.82532	0.998503	0.0141136
ENSSSCG00000027706	14	10	4.66305	3.68451	0.990229	-0.339821			ENSSSCG00000024663	60	51	3.61921	3.41391	0.997951	-0.241031
ENSSSCG00000000952	59	47	3.99396	3.68501	0.980616	-0.11617			ENSSSCG00000003811	144	139	3.61949	3.87867	0.998482	-0.0612262
ENSSSCG00000029715	89	112	3.33434	3.69373	0.972128	0.147683			ENSSSCG00000027480	67	82	3.62004	4.83968	0.997358	0.27731
ENSSSCG00000006283	87	86	3.48504	3.69645	0.988035	0.0850013			ENSSSCG00000022830	78	74	3.6267	3.89696	0.998406	-0.0855425
ENSSSCG00000023241	24	17	4.65416	3.70563	0.984952	-0.328826			ENSSSCG00000027207	101	96	3.62729	3.70599	0.998391	-0.0831065
ENSSSCG00000026263	20	23	3.21281	3.70728	0.990063	0.206538			ENSSSCG00000002932	62	44	3.62735	2.9686	0.994365	-0.496475
ENSSSCG00000015343	92	54	5.64612	3.70779	0.687099	-0.606691			ENSSSCG00000003620	106	117	3.62907	3.89882	0.998223	0.130699
ENSSSCG00000030154	76	61	3.86872	3.71118	0.978514	-0.0599631			ENSSSCG00000017915	21	26	3.6305	4.25995	0.998484	0.286005
ENSSSCG00000007421	10	13	3.00569	3.71133	0.991517	0.304224			ENSSSCG00000028531	34	44	3.63149	4.33248	0.997658	0.352767
ENSSSCG00000004634	67	58	3.68757	3.71397	0.98506	0.0102916			ENSSSCG00000002427	207	168	3.63439	3.41914	0.994762	-0.310257
ENSSSCG00000017767	12	13	3.4224	3.7205	0.992497	0.120488			ENSSSCG00000012620	83	96	3.63505	4.02754	0.997898	0.197207
ENSSSCG00000017382	65	57	4.01401	3.72213	0.985751	-0.108924			ENSSSCG00000015303	10	8	3.63866	3.12677	0.999024	-0.30103
ENSSSCG00000014187	26	30	2.90798	3.72586	0.988832	0.357562			ENSSSCG00000002434	107	104	3.63999	3.67083	0.998456	-0.0512202
ENSSSCG00000022707	8	4	5.92776	3.72762	0.990277	-0.66925			ENSSSCG00000016170	66	41	3.64064	2.50197	0.981218	-0.685052
ENSSSCG00000016412	9	17	1.85723	3.73018	0.977308	1.00612			ENSSSCG00000024818	63	95	3.64423	5.90219	0.981978	0.574929
ENSSSCG00000007094	71	70	3.65836	3.73133	0.988103	0.0284655			ENSSSCG00000022728	23	33	3.64489	4.74671	0.997241	0.493349
ENSSSCG00000008227	17	17	3.54891	3.73423	0.991673	0.0734273			ENSSSCG00000029424	85	86	3.64763	3.68968	0.998485	0.00615917
ENSSSCG00000021715	30	46	2.61354	3.73605	0.957687	0.51555			ENSSSCG00000002758	20	23	3.64766	3.75435	0.998717	0.182998
ENSSSCG00000000530	11	16	1.87847	3.73836	0.988492	0.99284			ENSSSCG00000025253	13	6	3.64988	1.70072	0.996908	-1.01625
ENSSSCG00000014448	88	83	4.3156	3.73935	0.987446	-0.206754			ENSSSCG00000027862	36	36	3.65191	4.29562	0.998646	-0.0103775
ENSSSCG00000002346	41	28	5.1984	3.74397	0.971103	-0.473487			ENSSSCG00000004332	54	44	3.65252	3.11433	0.997702	-0.300328
ENSSSCG00000004674	71	64	4.29121	3.74429	0.986497	-0.196685			ENSSSCG00000020663	126	138	3.65307	4.07873	0.998274	0.119747
ENSSSCG00000025171	22	22	3.42343	3.75719	0.990855	0.134228			ENSSSCG00000016336	45	43	3.65492	3.29601	0.998551	-0.0746477
ENSSSCG00000004719	102	160	2.47278	3.75737	0.637119	0.603589			ENSSSCG00000029816	24	15	3.65892	2.36232	0.996917	-0.656088
ENSSSCG00000028757	48	33	4.70515	3.75879	0.966545	-0.323984			ENSSSCG00000016088	46	56	3.66634	4.44119	0.99787	0.268195
ENSSSCG00000005082	149	107	4.53911	3.76043	0.913266	-0.27152			ENSSSCG00000011649	18	20	3.66796	4.5263	0.998818	0.134711
ENSSSCG00000009377	90	139	2.62949	3.76628	0.749441	0.518359			ENSSSCG00000021826	7	11	3.66949	5.41104	0.998696	0.579257
ENSSSCG00000027211	100	98	3.48983	3.76782	0.98803	0.110578			ENSSSCG00000023293	13	12	3.66974	3.62746	0.998993	-0.117333
ENSSSCG00000011679	155	138	3.63368	3.76968	0.9851	0.0530104			ENSSSCG00000023782	25	35	3.67004	5.22871	0.997348	0.460163
ENSSSCG00000023027	36	33	3.69943	3.77064	0.988921	0.0275028			ENSSSCG00000028752	18	24	3.6713	4.6658	0.998301	0.386921
ENSSSCG00000005486	120	74	6.6484	3.77078	0.676417	-0.818137			ENSSSCG00000029792	67	83	3.6714	4.34533	0.997151	0.2946
ENSSSCG00000014852	48	53	3.44044	3.77083	0.987443	0.132294			ENSSSCG00000027064	37	46	3.67258	4.8747	0.997925	0.29672
ENSSSCG00000011346	37	45	3.31955	3.77576	0.985001	0.185773			ENSSSCG00000004958	41	25	3.67307	2.47731	0.992034	-0.703578
ENSSSCG00000007360	250	215	4.29768	3.77577	0.982305	-0.186782			ENSSSCG00000010721	20	28	3.67771	5.27699	0.997822	0.45665
ENSSSCG00000025932	11	14	2.52513	3.7846	0.991343	0.5838			ENSSSCG00000004023	181	158	3.68079	3.22989	0.997559	-0.205574
ENSSSCG00000020961	35	48	2.40076	3.7851	0.975107	0.656816			ENSSSCG00000011254	45	42	3.68537	3.56392	0.998512	-0.107861
ENSSSCG00000010825	29	21	5.00787	3.78551	0.983449	-0.403722			ENSSSCG00000011391	60	45	3.68609	2.74516	0.996215	-0.41813
ENSSSCG00000011857	40	46	2.9955	3.78654	0.986921	0.338068			ENSSSCG00000014409	106	102	3.68845	4.11621	0.99843	-0.0655525
ENSSSCG00000003287	18	28	2.60514	3.78686	0.97617	0.539679			ENSSSCG00000024876	10	6	3.68923	2.19008	0.998649	-0.666412
ENSSSCG00000009328	25	24	3.6522	3.7876	0.990434	0.0525182			ENSSSCG00000007599	241	263	3.69007	3.87069	0.998484	0.114955
ENSSSCG00000023063	12	15	2.88971	3.79047	0.991175	0.391468			ENSSSCG00000008151	87	83	3.69084	3.4916	0.99841	-0.0776958
ENSSSCG00000001826	95	66	5.29078	3.79643	0.928396	-0.478854			ENSSSCG00000003014	22	23	3.69115	3.56953	0.998797	0.0513473
ENSSSCG00000030126	81	80	3.3072	3.79757	0.988039	0.199478			ENSSSCG00000011218	130	115	3.69202	3.69665	0.997854	-0.1861
ENSSSCG00000021042	67	73	3.16011	3.80045	0.986984	0.266219			ENSSSCG00000020879	68	64	3.69209	3.72405	0.998409	-0.0967378
ENSSSCG00000022294	51	64	2.715	3.80124	0.979731	0.485503			ENSSSCG00000006235	77	101	3.69256	5.21826	0.995053	0.376769
ENSSSCG00000013786	66	63	3.76779	3.80479	0.987911	0.0140982			ENSSSCG00000027741	53	55	3.69367	4.22455	0.998525	0.0420631
ENSSSCG00000011629	88	66	4.66497	3.80939	0.964133	-0.292313			ENSSSCG00000005761	146	176	3.69402	3.97598	0.996705	0.257455
ENSSSCG00000026882	17	17	4.22005	3.81067	0.991673	-0.147221			ENSSSCG00000001342	68	71	3.69424	3.87673	0.998472	0.0509509
ENSSSCG00000009786	123	182	2.6569	3.81151	0.776332	0.520615			ENSSSCG00000011385	72	70	3.69488	3.59904	0.998469	-0.050622
ENSSSCG00000010631	98	115	2.90494	3.81255	0.981775	0.392287			ENSSSCG00000000363	140	152	3.69904	4.02486	0.998341	0.107309
ENSSSCG00000014176	36	64	2.24026	3.81541	0.78987	0.768142			ENSSSCG00000006290	71	68	3.69909	3.82811	0.998444	-0.0719624
ENSSSCG00000005842	48	27	7.16532	3.81711	0.886539	-0.90855			ENSSSCG00000001596	91	125	3.70039	4.8335	0.990089	0.443437
ENSSSCG00000024399	146	124	4.45308	3.81933	0.980668	-0.221502			ENSSSCG00000017550	34	33	3.70175	3.60644	0.998656	-0.0522563
ENSSSCG00000027957	194	176	4.22308	3.81946	0.986756	-0.144919			ENSSSCG00000021519	29	48	3.70278	6.24153	0.989724	0.698643
ENSSSCG00000007599	179	276	2.59684	3.82324	0.43895	0.558046			ENSSSCG00000005325	99	80	3.70307	2.9334	0.996517	-0.31476
ENSSSCG00000000754	68	49	5.04272	3.82469	0.962904	-0.39885			ENSSSCG00000006132	65	80	3.7083	5.02696	0.997309	0.285207
ENSSSCG00000004774	174	111	5.78652	3.82802	0.596179	-0.5961			ENSSSCG00000027991	38	39	3.70857	3.49835	0.998623	0.0261909
ENSSSCG00000008169	131	105	4.72589	3.83004	0.971861	-0.303245			ENSSSCG00000009448	32	34	3.71072	4.31303	0.998647	0.0746966
ENSSSCG00000021384	35	42	2.75288	3.83207	0.986016	0.477183			ENSSSCG00000002001	199	224	3.71311	4.03925	0.998084	0.159376
ENSSSCG00000005282	134	176	2.4469	3.83628	0.947431	0.64876			ENSSSCG00000024214	20	22	3.71381	4.04578	0.998786	0.121438
ENSSSCG00000000007	96	127	3.09043	3.83838	0.954964	0.312711			ENSSSCG00000000807	52	45	3.71394	3.34162	0.998177	-0.21507
ENSSSCG00000010396	104	91	4.19802	3.84241	0.984183	-0.127694			ENSSSCG00000007615	33	41	3.71482	4.42167	0.998057	0.294994
ENSSSCG00000016700	56	39	5.86915	3.84644	0.962858	-0.609655			ENSSSCG00000008070	15	18	3.71516	4.96532	0.998784	0.238776
ENSSSCG00000028036	145	167	3.73088	3.84648	0.982978	0.0440226			ENSSSCG00000013492	63	76	3.71639	4.279	0.997635	0.256527
ENSSSCG00000017819	72	82	3.2114	3.84721	0.985017	0.260606			ENSSSCG00000005605	11	27	3.71928	8.16597	0.974379	1.21678
ENSSSCG00000006169	398	331	4.44149	3.84734	0.977463	-0.207201			ENSSSCG00000007327	13	11	3.71949	3.39626	0.998944	-0.233376
ENSSSCG00000009449	76	53	4.86378	3.8537	0.94728	-0.33584			ENSSSCG00000023368	14	13	3.72035	3.49051	0.998967	-0.109936
ENSSSCG00000008517	58	56	3.93236	3.85509	0.988228	-0.0286418			ENSSSCG00000006703	22	24	3.72249	3.26949	0.998758	0.110388
ENSSSCG00000014967	39	45	3.27192	3.85609	0.986926	0.237014			ENSSSCG00000010735	65	117	3.72551	6.45241	0.695438	0.82834
ENSSSCG00000026681	34	37	3.23724	3.85833	0.988857	0.253219			ENSSSCG00000010631	135	114	3.72713	3.52379	0.99706	-0.252665
ENSSSCG00000011670	38	66	2.1108	3.86874	0.812241	0.874059			ENSSSCG00000028906	40	49	3.73151	4.47187	0.997962	0.276287
ENSSSCG00000024961	36	31	3.78117	3.87282	0.987838	0.0345328			ENSSSCG00000006367	20	16	3.73554	2.77726	0.998613	-0.316014
ENSSSCG00000027155	34	64	2.16035	3.87718	0.682151	0.843717			ENSSSCG00000028447	8	8	3.73813	3.61671	0.999163	-0.00953241
ENSSSCG00000000858	11	10	3.70128	3.87793	0.993002	0.0672435			ENSSSCG00000011524	109	80	3.73817	3.12075	0.991032	-0.452353
ENSSSCG00000024400	67	59	4.10718	3.87932	0.985811	-0.0823589			ENSSSCG00000017518	91	92	3.74242	3.61504	0.998486	0.00506825
ENSSSCG00000000764	26	34	3.10549	3.88113	0.98417	0.32164			ENSSSCG00000022077	35	28	3.74324	3.25319	0.9981	-0.322905
ENSSSCG00000011402	53	53	4.04935	3.8823	0.988505	-0.0607966			ENSSSCG00000028615	8	6	3.74634	2.7811	0.999086	-0.374915
ENSSSCG00000011495	101	105	3.80725	3.88353	0.987838	0.0285892			ENSSSCG00000027323	29	25	3.74664	3.53986	0.998541	-0.217217
ENSSSCG00000015027	30	38	3.32796	3.88418	0.98455	0.222962			ENSSSCG00000027857	253	232	3.74723	4.04192	0.998334	-0.135138
ENSSSCG00000009166	81	63	4.44109	3.88657	0.973428	-0.192408			ENSSSCG00000014898	69	41	3.74729	2.48432	0.967678	-0.748309
ENSSSCG00000025545	229	238	3.96963	3.88734	0.989879	-0.0302252			ENSSSCG00000029481	10	14	3.74751	4.91878	0.998695	0.439864
ENSSSCG00000009937	574	297	7.50715	3.8874	9.31625e-05	-0.949469			ENSSSCG00000028000	60	41	3.75098	2.93244	0.992931	-0.549556
ENSSSCG00000005661	72	142	2.09099	3.88761	0.0409305	0.894687			ENSSSCG00000016971	41	41	3.7516	3.99996	0.998608	-0.0104097
ENSSSCG00000021862	69	67	3.95672	3.88858	0.988037	-0.0250468			ENSSSCG00000017311	199	233	3.75193	4.2829	0.997356	0.215975
ENSSSCG00000021586	68	102	2.70037	3.89315	0.884454	0.527783			ENSSSCG00000028791	22	40	3.7539	5.524	0.986925	0.825459
ENSSSCG00000016494	49	47	3.70666	3.89747	0.98851	0.0724137			ENSSSCG00000023884	45	61	3.75478	5.67087	0.996142	0.420698
ENSSSCG00000011553	164	169	3.80593	3.89786	0.988845	0.0344594			ENSSSCG00000003628	161	135	3.75494	3.48729	0.996677	-0.263077
ENSSSCG00000024438	23	24	3.64135	3.90218	0.990561	0.0997945			ENSSSCG00000015882	167	171	3.75561	4.34494	0.998592	0.0233716
ENSSSCG00000015819	119	109	4.03866	3.90314	0.986529	-0.0492706			ENSSSCG00000013632	31	21	3.75663	2.46989	0.996908	-0.552155
ENSSSCG00000012251	120	126	3.2483	3.90361	0.987835	0.26512			ENSSSCG00000022611	86	82	3.75737	3.92385	0.998409	-0.0784854
ENSSSCG00000011519	63	57	3.97397	3.9043	0.986917	-0.025528			ENSSSCG00000014958	64	68	3.75806	3.77799	0.998447	0.0757413
ENSSSCG00000016369	13	9	5.91715	3.90775	0.990314	-0.598558			ENSSSCG00000030469	43	55	3.76113	5.32432	0.997402	0.337931
ENSSSCG00000001052	60	64	3.64891	3.90998	0.987688	0.099707			ENSSSCG00000001577	101	104	3.76187	3.89444	0.998478	0.0312953
ENSSSCG00000026122	56	42	4.30636	3.91041	0.975233	-0.139166			ENSSSCG00000000523	55	74	3.76438	5.90435	0.995545	0.411393
ENSSSCG00000013490	48	53	3.65302	3.91369	0.987443	0.0994514			ENSSSCG00000014138	11	8	3.76591	2.93247	0.998877	-0.427306
ENSSSCG00000012141	65	33	7.42153	3.91785	0.560121	-0.92163			ENSSSCG00000026575	14	8	3.76614	2.3589	0.997931	-0.750874
ENSSSCG00000025576	13	15	3.20041	3.91961	0.991775	0.292454			ENSSSCG00000011940	71	63	3.76634	3.79616	0.998136	-0.180587
ENSSSCG00000004071	77	69	4.19477	3.92404	0.986092	-0.096277			ENSSSCG00000021310	36	39	3.77051	4.78763	0.998574	0.102276
ENSSSCG00000015145	84	86	3.78919	3.92506	0.987962	0.0508361			ENSSSCG00000014112	49	67	3.77765	5.57369	0.995509	0.433625
ENSSSCG00000007155	106	78	4.98948	3.92681	0.951019	-0.345541			ENSSSCG00000030599	7	9	3.77787	4.83707	0.999068	0.314749
ENSSSCG00000013862	122	150	3.24092	3.92767	0.973582	0.27729			ENSSSCG00000014187	37	30	3.77821	3.36978	0.998114	-0.304639
ENSSSCG00000000292	118	96	5.35238	3.93048	0.975753	-0.445473			ENSSSCG00000023030	7	9	3.77856	4.93742	0.999068	0.314749
ENSSSCG00000024761	138	130	3.68154	3.93258	0.987689	0.0951898			ENSSSCG00000014966	34	31	3.78061	3.75525	0.998581	-0.139881
ENSSSCG00000001518	393	472	3.36395	3.93615	0.978759	0.226626			ENSSSCG00000026654	49	63	3.78127	4.43308	0.997067	0.346081
ENSSSCG00000028287	116	128	3.49398	3.93665	0.986062	0.172107			ENSSSCG00000008135	53	48	3.78261	3.65809	0.998368	-0.150807
ENSSSCG00000026887	12	14	3.34421	3.93867	0.991978	0.236058			ENSSSCG00000023908	65	71	3.78271	4.77199	0.99836	0.115146
ENSSSCG00000007617	63	62	3.92616	3.94024	0.98822	0.0051352			ENSSSCG00000004423	31	27	3.78409	3.65732	0.998528	-0.203374
ENSSSCG00000023974	214	181	4.65251	3.94278	0.979566	-0.238786			ENSSSCG00000001074	105	85	3.78564	3.37042	0.996431	-0.312402
ENSSSCG00000009859	28	40	2.8783	3.94578	0.974846	0.455101			ENSSSCG00000016091	97	63	3.78594	2.67306	0.971035	-0.625732
ENSSSCG00000021854	64	75	3.20976	3.94739	0.983757	0.298419			ENSSSCG00000027006	32	29	3.78605	3.54492	0.998597	-0.148115
ENSSSCG00000029023	21	24	3.4533	3.94763	0.98995	0.193			ENSSSCG00000023899	136	256	3.78627	6.90275	0.00977393	0.897318
ENSSSCG00000017316	41	56	2.61367	3.94905	0.97196	0.59543			ENSSSCG00000009367	44	44	3.78852	3.87213	0.998588	-0.0104256
ENSSSCG00000014842	49	49	3.64559	3.94907	0.988654	0.115368			ENSSSCG00000017926	54	55	3.79095	3.70761	0.998536	0.0155579
ENSSSCG00000028869	97	100	3.33183	3.95052	0.987926	0.245733			ENSSSCG00000024519	45	46	3.7912	4.1029	0.998577	0.0206372
ENSSSCG00000003568	155	113	5.7037	3.95259	0.923618	-0.529096			ENSSSCG00000023539	119	91	3.79232	3.16427	0.993477	-0.394116
ENSSSCG00000010662	129	162	3.04821	3.95265	0.967581	0.374881			ENSSSCG00000014176	58	55	3.79267	3.44898	0.998466	-0.0858462
ENSSSCG00000008111	91	58	5.59629	3.95412	0.853158	-0.501124			ENSSSCG00000027222	12	9	3.79776	2.60369	0.998859	-0.390428
ENSSSCG00000025317	18	28	2.42442	3.95567	0.97617	0.706305			ENSSSCG00000008060	40	47	3.79907	4.57696	0.998242	0.21732
ENSSSCG00000023776	75	107	2.66194	3.95623	0.9235	0.571659			ENSSSCG00000030643	20	20	3.80688	4.23179	0.998848	-0.0101714
ENSSSCG00000017518	106	107	4.12406	3.95976	0.988152	-0.0586518			ENSSSCG00000009578	78	67	3.80746	3.22525	0.997823	-0.227019
ENSSSCG00000026795	61	98	2.46624	3.9661	0.791592	0.685431			ENSSSCG00000027992	144	202	3.81026	5.22204	0.972895	0.475022
ENSSSCG00000011121	19	19	4.05924	3.96874	0.99132	-0.0325289			ENSSSCG00000016147	239	229	3.81036	4.0358	0.998637	-0.0720222
ENSSSCG00000010039	46	42	4.12221	3.96954	0.98805	-0.0544572			ENSSSCG00000028054	90	106	3.81748	4.28595	0.99763	0.223279
ENSSSCG00000010296	19	25	2.86199	3.97248	0.986948	0.473024			ENSSSCG00000024762	73	79	3.82073	4.05972	0.998369	0.102051
ENSSSCG00000026140	65	35	6.98916	3.97499	0.7007	-0.814172			ENSSSCG00000014580	37	37	3.82079	3.64454	0.998638	-0.0103846
ENSSSCG00000011695	70	43	5.89577	3.97611	0.873767	-0.568334			ENSSSCG00000027423	54	49	3.82379	3.2453	0.998366	-0.148129
ENSSSCG00000027584	53	41	5.34672	3.97734	0.979419	-0.426859			ENSSSCG00000005893	88	75	3.82967	3.33312	0.997636	-0.23851
ENSSSCG00000015590	106	107	3.81695	3.97907	0.988152	0.060003			ENSSSCG00000022710	16	14	3.83045	3.23092	0.998876	-0.191323
ENSSSCG00000023026	41	54	2.94347	3.98103	0.977309	0.435598			ENSSSCG00000006274	408	366	3.83061	3.55638	0.998292	-0.166968
ENSSSCG00000015803	63	34	7.09564	3.98174	0.724986	-0.83354			ENSSSCG00000003783	38	34	3.83165	3.92152	0.998487	-0.166769
ENSSSCG00000028052	277	269	4.42573	3.9838	0.990709	-0.15176			ENSSSCG00000004075	47	40	3.83247	3.67162	0.998161	-0.238163
ENSSSCG00000000619	142	141	3.95353	3.98395	0.988627	0.0110872			ENSSSCG00000011425	94	123	3.83253	5.11195	0.994191	0.374015
ENSSSCG00000026798	108	115	3.36717	3.98685	0.98738	0.243718			ENSSSCG00000016109	144	133	3.83395	3.80142	0.998255	-0.124448
ENSSSCG00000014838	30	34	3.10726	3.98828	0.988582	0.360112			ENSSSCG00000010224	72	40	3.83497	2.13428	0.925669	-0.843724
ENSSSCG00000011041	65	56	4.20304	3.99156	0.984967	-0.0744523			ENSSSCG00000023630	18	12	3.83571	2.77986	0.998128	-0.559753
ENSSSCG00000006277	108	136	3.24753	3.99627	0.969225	0.299335			ENSSSCG00000021383	126	132	3.83591	4.33266	0.998473	0.0560602
ENSSSCG00000030484	166	74	7.71199	3.99689	0.00100951	-0.948224			ENSSSCG00000011813	70	62	3.83735	3.61473	0.998132	-0.183131
ENSSSCG00000022610	180	126	5.14418	3.99951	0.856693	-0.363127			ENSSSCG00000015047	69	82	3.8404	4.69964	0.997728	0.235448
ENSSSCG00000023728	112	85	4.61491	4.00578	0.960383	-0.204209			ENSSSCG00000028373	61	76	3.8405	4.67391	0.997203	0.30238
ENSSSCG00000027278	68	36	6.55521	4.00607	0.62943	-0.710441			ENSSSCG00000026045	83	90	3.84366	4.47026	0.998342	0.105029
ENSSSCG00000018014	132	124	4.34393	4.01022	0.987536	-0.115317			ENSSSCG00000023303	61	37	3.84419	2.41045	0.980628	-0.717652
ENSSSCG00000024382	53	56	3.87147	4.01296	0.988086	0.0517885			ENSSSCG00000003000	153	176	3.84464	4.22637	0.997749	0.190311
ENSSSCG00000015293	11	20	2.04298	4.01433	0.974188	0.974459			ENSSSCG00000022192	69	48	3.84692	2.82334	0.992382	-0.525617
ENSSSCG00000007953	29	39	3.12523	4.01578	0.980757	0.361739			ENSSSCG00000011207	46	37	3.84782	3.41713	0.997801	-0.31754
ENSSSCG00000001049	328	350	3.79664	4.01982	0.990794	0.0824157			ENSSSCG00000014219	42	34	3.84929	3.37925	0.997963	-0.307865
ENSSSCG00000014366	68	47	5.94667	4.02046	0.950898	-0.564714			ENSSSCG00000007502	41	55	3.85074	5.82958	0.996703	0.405152
ENSSSCG00000004711	55	60	3.67804	4.02428	0.987373	0.129816			ENSSSCG00000000007	112	124	3.85613	4.01364	0.998198	0.135121
ENSSSCG00000022092	32	65	1.76606	4.02567	0.477881	1.18867			ENSSSCG00000017227	78	83	3.85619	3.89527	0.998414	0.0780819
ENSSSCG00000014993	26	27	3.33167	4.02668	0.990197	0.273339			ENSSSCG00000024816	55	62	3.85698	3.79994	0.998279	0.15963
ENSSSCG00000001659	126	96	5.35469	4.02693	0.958255	-0.411136			ENSSSCG00000007531	38	65	3.85856	6.13857	0.972687	0.749524
ENSSSCG00000005576	16	23	2.46983	4.02952	0.984786	0.706207			ENSSSCG00000027652	54	49	3.85885	3.77512	0.998366	-0.148129
ENSSSCG00000006903	89	73	4.35729	4.03131	0.97935	-0.112189			ENSSSCG00000026818	101	114	3.85906	4.26532	0.998058	0.162613
ENSSSCG00000030156	16	32	1.75401	4.03285	0.907787	1.20117			ENSSSCG00000008903	143	172	3.86244	4.37289	0.996794	0.254228
ENSSSCG00000028953	50	32	6.04847	4.03789	0.946673	-0.582972			ENSSSCG00000006213	15	12	3.86383	1.99379	0.998807	-0.310856
ENSSSCG00000008312	322	238	5.60459	4.03947	0.889745	-0.472435			ENSSSCG00000002263	103	117	3.86768	4.12396	0.997993	0.171752
ENSSSCG00000003831	28	30	3.04508	4.0442	0.989707	0.409365			ENSSSCG00000022177	61	59	3.8679	3.67624	0.998489	-0.0578394
ENSSSCG00000028190	107	88	4.86018	4.04648	0.978168	-0.264341			ENSSSCG00000022078	7	8	3.86976	4.44318	0.999161	0.161763
ENSSSCG00000026041	63	86	2.68465	4.05045	0.958293	0.593339			ENSSSCG00000000763	46	66	3.87485	5.40923	0.993792	0.501624
ENSSSCG00000013084	34	29	4.54986	4.05136	0.987908	-0.167414			ENSSSCG00000017868	63	55	3.8796	3.34417	0.998101	-0.203333
ENSSSCG00000009015	123	122	3.94079	4.05545	0.988341	0.0413913			ENSSSCG00000025426	14	16	3.88017	4.84175	0.998892	0.171284
ENSSSCG00000024176	7	12	2.41034	4.05551	0.988117	0.750667			ENSSSCG00000002752	271	303	3.88197	4.2982	0.998291	0.149888
ENSSSCG00000008266	156	166	3.80274	4.05608	0.988	0.0930691			ENSSSCG00000025030	45	51	3.88235	4.82827	0.998348	0.166668
ENSSSCG00000004223	58	62	3.65566	4.05668	0.987709	0.150159			ENSSSCG00000014818	57	65	3.88245	4.19071	0.998201	0.176122
ENSSSCG00000000926	166	215	2.61778	4.0573	0.949798	0.632165			ENSSSCG00000012794	30	36	3.88289	3.85982	0.998342	0.245392
ENSSSCG00000025340	63	53	5.14022	4.05899	0.983878	-0.3407			ENSSSCG00000027731	11	6	3.88416	2.20845	0.998267	-0.792689
ENSSSCG00000029696	37	41	3.3096	4.06436	0.988236	0.296386			ENSSSCG00000015537	63	57	3.88453	3.93943	0.998291	-0.152653
ENSSSCG00000024859	29	35	3.46893	4.06576	0.986988	0.229061			ENSSSCG00000027343	28	38	3.88659	5.15033	0.997476	0.417897
ENSSSCG00000011677	57	40	5.30664	4.06904	0.963781	-0.383114			ENSSSCG00000003731	107	142	3.88701	4.94229	0.992215	0.394628
ENSSSCG00000004668	39	44	3.70809	4.06909	0.987608	0.13403			ENSSSCG00000015284	41	53	3.88782	5.59823	0.997341	0.352626
ENSSSCG00000010056	74	40	7.55203	4.06937	0.61726	-0.892043			ENSSSCG00000006475	204	161	3.88879	3.05982	0.992583	-0.350343
ENSSSCG00000006869	10	18	2.0753	4.07007	0.978478	0.971744			ENSSSCG00000027219	11	11	3.89062	4.16851	0.999059	-0.00981262
ENSSSCG00000016147	283	217	4.80056	4.07027	0.938479	-0.23808			ENSSSCG00000020931	110	82	3.89096	3.19439	0.992274	-0.430201
ENSSSCG00000008447	16	18	3.43862	4.07258	0.991229	0.244129			ENSSSCG00000008820	72	81	3.89239	4.67417	0.998184	0.157349
ENSSSCG00000008943	183	152	4.44521	4.07673	0.976613	-0.124847			ENSSSCG00000011432	65	60	3.89363	3.54059	0.99836	-0.124262
ENSSSCG00000000916	248	57	15.5171	4.07796	3.10862e-15	-1.92793			ENSSSCG00000023437	60	73	3.89409	5.04712	0.997581	0.268486
ENSSSCG00000003816	32	41	2.66603	4.07802	0.983203	0.613185			ENSSSCG00000022023	140	142	3.89767	4.04878	0.998544	0.00975215
ENSSSCG00000001657	279	216	5.42512	4.08048	0.946073	-0.410904			ENSSSCG00000010338	13	5	3.89781	1.58245	0.995102	-1.24076
ENSSSCG00000001090	39	53	3.06828	4.0869	0.973992	0.413567			ENSSSCG00000028455	9	8	3.89911	3.42665	0.999117	-0.162631
ENSSSCG00000027602	27	35	3.18252	4.09141	0.984277	0.362434			ENSSSCG00000012607	46	91	3.89994	8.23795	0.620447	0.959454
ENSSSCG00000017063	35	23	5.84516	4.09197	0.97143	-0.514446			ENSSSCG00000026139	40	55	3.90032	5.67745	0.996219	0.439974
ENSSSCG00000001427	897	201	18.5128	4.0921	0	-2.17761			ENSSSCG00000011896	68	85	3.9022	4.8739	0.996949	0.30749
ENSSSCG00000011560	37	42	3.61646	4.09391	0.987657	0.178882			ENSSSCG00000003875	92	67	3.90338	2.95263	0.992284	-0.462584
ENSSSCG00000022438	65	40	6.80578	4.09393	0.891399	-0.733289			ENSSSCG00000008959	23	18	3.9118	3.09467	0.998437	-0.348233
ENSSSCG00000022293	28	30	3.53289	4.09455	0.989707	0.21287			ENSSSCG00000012202	54	61	3.91257	4.20432	0.998277	0.162551
ENSSSCG00000015432	67	88	3.09414	4.09751	0.967708	0.405224			ENSSSCG00000009069	12	12	3.91301	4.19864	0.999029	-0.00987715
ENSSSCG00000024285	115	135	3.64409	4.1013	0.981222	0.170519			ENSSSCG00000030011	67	35	3.91359	2.45357	0.889163	-0.929189
ENSSSCG00000005735	5	9	2.22709	4.10667	0.990415	0.882813			ENSSSCG00000006869	22	28	3.91893	5.62902	0.998325	0.324999
ENSSSCG00000004281	161	145	4.42486	4.10708	0.985916	-0.107525			ENSSSCG00000021981	45	53	3.91965	5.02597	0.998145	0.221179
ENSSSCG00000014579	59	49	4.44254	4.11002	0.98356	-0.112233			ENSSSCG00000028790	66	82	3.92062	4.63664	0.997121	0.298705
ENSSSCG00000007512	70	56	4.6457	4.11225	0.979092	-0.17595			ENSSSCG00000027549	32	30	3.92221	3.59504	0.998647	-0.100715
ENSSSCG00000009627	155	147	4.49712	4.11599	0.988115	-0.127752			ENSSSCG00000026525	26	47	3.92408	7.24581	0.981303	0.821224
ENSSSCG00000022690	16	15	3.89267	4.11714	0.991849	0.0808573			ENSSSCG00000014276	44	42	3.92429	3.82937	0.998556	-0.0761049
ENSSSCG00000008026	224	300	3.29315	4.11815	0.908521	0.322524			ENSSSCG00000001134	6	10	3.92831	5.91322	0.998687	0.647465
ENSSSCG00000027489	118	101	5.00454	4.12285	0.982107	-0.279566			ENSSSCG00000025097	32	47	3.93278	5.22682	0.995393	0.531057
ENSSSCG00000016690	52	40	5.50303	4.12389	0.979183	-0.416209			ENSSSCG00000023167	44	53	3.93503	4.79245	0.998004	0.252935
ENSSSCG00000023103	26	29	3.22171	4.12595	0.989453	0.356922			ENSSSCG00000000926	282	212	3.93868	3.489	0.977865	-0.420663
ENSSSCG00000004808	1	16	0.28065	4.12912	0.128311	3.87873			ENSSSCG00000015614	71	83	3.94031	4.84651	0.997884	0.212058
ENSSSCG00000007492	101	73	5.51863	4.13033	0.945548	-0.418056			ENSSSCG00000011913	64	44	3.94135	2.97254	0.992545	-0.54161
ENSSSCG00000014249	59	49	4.94812	4.13442	0.98356	-0.259197			ENSSSCG00000011884	69	69	3.94448	4.04831	0.998499	-0.0105048
ENSSSCG00000028791	35	34	4.92904	4.13832	0.98944	-0.252257			ENSSSCG00000004859	131	179	3.94479	5.006	0.984986	0.437065
ENSSSCG00000017993	24	48	2.26583	4.13856	0.756652	0.869122			ENSSSCG00000029109	69	78	3.94736	4.98714	0.998169	0.164136
ENSSSCG00000007161	173	179	4.24285	4.13985	0.988946	-0.0354548			ENSSSCG00000009627	132	156	3.94856	4.55403	0.997304	0.228867
ENSSSCG00000024967	12	16	3.29951	4.14474	0.990041	0.32902			ENSSSCG00000011518	71	71	3.94903	4.27212	0.998496	-0.0105088
ENSSSCG00000017197	112	166	2.91542	4.14587	0.797222	0.507991			ENSSSCG00000028023	20	13	3.95243	2.83093	0.997788	-0.597234
ENSSSCG00000021154	3	9	1.31815	4.14777	0.978986	1.65378			ENSSSCG00000028651	6	8	3.9532	4.68963	0.999099	0.356171
ENSSSCG00000003464	103	67	6.12835	4.14864	0.851192	-0.562886			ENSSSCG00000011264	100	110	3.95376	4.12374	0.998249	0.125734
ENSSSCG00000005094	96	36	12.0454	4.15009	0.00205273	-1.53726			ENSSSCG00000021259	24	27	3.95668	4.35886	0.998672	0.153629
ENSSSCG00000016340	56	68	3.79395	4.15011	0.981929	0.129426			ENSSSCG00000021564	25	26	3.9575	3.69339	0.998754	0.0443101
ENSSSCG00000002752	285	301	3.97799	4.15083	0.990452	0.0613461			ENSSSCG00000013490	49	74	3.95781	5.76501	0.988648	0.575101
ENSSSCG00000022819	34	39	3.35125	4.15132	0.987742	0.308842			ENSSSCG00000015310	350	296	3.95901	3.82749	0.996433	-0.251672
ENSSSCG00000005501	112	103	4.54356	4.15788	0.986676	-0.127981			ENSSSCG00000027934	11	8	3.96014	2.70896	0.998877	-0.427306
ENSSSCG00000026467	10	11	3.64366	4.15827	0.993002	0.19059			ENSSSCG00000004149	247	344	3.96033	5.31529	0.946305	0.465749
ENSSSCG00000023046	60	46	4.63163	4.16036	0.976602	-0.154788			ENSSSCG00000028521	22	35	3.96055	6.00029	0.995309	0.637533
ENSSSCG00000003344	100	112	4.10136	4.16075	0.985299	0.0207445			ENSSSCG00000008537	82	90	3.96207	4.65278	0.998288	0.122321
ENSSSCG00000010272	65	161	1.77644	4.16076	0.000113641	1.2279			ENSSSCG00000001997	10	13	3.96309	4.97501	0.998865	0.339908
ENSSSCG00000023793	28	37	2.96275	4.16103	0.982625	0.489969			ENSSSCG00000005314	30	23	3.96394	2.92316	0.99805	-0.380388
ENSSSCG00000011432	51	73	2.95905	4.16136	0.950427	0.491911			ENSSSCG00000011402	50	86	3.96818	6.54568	0.93552	0.76078
ENSSSCG00000022672	39	45	3.77986	4.16479	0.986926	0.139899			ENSSSCG00000026459	8	9	3.96913	4.34057	0.999124	0.143454
ENSSSCG00000024536	99	88	4.6214	4.16738	0.985214	-0.149182			ENSSSCG00000008762	97	99	3.96929	4.4241	0.998484	0.0186188
ENSSSCG00000024674	93	135	2.84591	4.1725	0.877956	0.552027			ENSSSCG00000023793	40	25	3.97354	2.65482	0.993433	-0.668755
ENSSSCG00000013922	23	32	3.18913	4.17287	0.981583	0.387901			ENSSSCG00000005627	43	50	3.97775	4.43299	0.99825	0.202848
ENSSSCG00000015196	77	67	4.52696	4.17578	0.984758	-0.116503			ENSSSCG00000000859	40	30	3.97834	3.48011	0.997379	-0.414452
ENSSSCG00000015660	54	46	4.65138	4.17696	0.985391	-0.155198			ENSSSCG00000011352	24	26	3.98104	4.16174	0.998731	0.101045
ENSSSCG00000009070	17	18	3.33775	4.17921	0.991475	0.324329			ENSSSCG00000025233	23	23	3.98248	4.63729	0.998798	-0.0102311
ENSSSCG00000012203	147	116	4.67537	4.18445	0.966348	-0.160035			ENSSSCG00000023464	25	23	3.98291	3.51566	0.998727	-0.126023
ENSSSCG00000004478	93	113	3.00278	4.18454	0.977843	0.478747			ENSSSCG00000013862	148	160	3.98361	4.2969	0.998377	0.101212
ENSSSCG00000002051	127	87	6.32841	4.19243	0.880327	-0.594064			ENSSSCG00000024941	33	39	3.98398	5.29116	0.998344	0.2245
ENSSSCG00000006038	96	70	5.79448	4.19462	0.951919	-0.466151			ENSSSCG00000025287	42	45	3.98425	5.05157	0.998541	0.0870155
ENSSSCG00000014157	109	99	4.91535	4.19505	0.986166	-0.228604			ENSSSCG00000027325	61	58	3.98738	3.41294	0.998459	-0.0821118
ENSSSCG00000015669	56	55	3.84941	4.19766	0.988387	0.124965			ENSSSCG00000015116	34	30	3.99029	3.57723	0.998509	-0.185773
ENSSSCG00000000114	61	95	2.86141	4.19882	0.852552	0.553256			ENSSSCG00000017775	56	59	3.99074	4.04224	0.998492	0.0636055
ENSSSCG00000016231	38	24	6.13388	4.19917	0.961678	-0.54669			ENSSSCG00000030204	140	132	3.99201	3.94258	0.998378	-0.094883
ENSSSCG00000026960	67	58	4.15993	4.19946	0.98506	0.0136687			ENSSSCG00000027714	33	37	3.99411	4.59918	0.998531	0.150384
ENSSSCG00000015507	175	111	6.89491	4.19986	0.569344	-0.715175			ENSSSCG00000017893	43	51	3.99663	4.5319	0.998134	0.230895
ENSSSCG00000008762	91	88	3.96214	4.19989	0.987859	0.0840897			ENSSSCG00000025739	41	28	4.0001	3.07826	0.995834	-0.545686
ENSSSCG00000028895	28	17	7.09084	4.20038	0.970364	-0.755422			ENSSSCG00000012377	141	108	4.0009	3.33636	0.99235	-0.392327
ENSSSCG00000027205	174	97	7.34473	4.20212	0.105519	-0.805593			ENSSSCG00000012680	36	55	4.00108	7.65035	0.992538	0.588331
ENSSSCG00000011292	57	46	4.97841	4.20291	0.981972	-0.244297			ENSSSCG00000007391	59	60	4.00147	3.88779	0.99852	0.0133897
ENSSSCG00000011482	92	60	5.89485	4.203	0.878933	-0.488048			ENSSSCG00000011313	73	95	4.00269	4.89265	0.995608	0.365269
ENSSSCG00000021149	86	57	5.4288	4.20595	0.905701	-0.368184			ENSSSCG00000026885	21	35	4.00467	6.9269	0.994044	0.701858
ENSSSCG00000001815	35	30	4.23445	4.20682	0.987872	-0.0094684			ENSSSCG00000030707	99	153	4.00605	6.06246	0.925113	0.612691
ENSSSCG00000016611	167	139	4.67258	4.21269	0.977317	-0.14948			ENSSSCG00000003061	88	96	4.01204	4.31526	0.998307	0.113726
ENSSSCG00000007544	104	154	2.89614	4.21479	0.818406	0.541353			ENSSSCG00000003068	100	153	4.01373	5.76413	0.936178	0.598326
ENSSSCG00000024939	43	47	4.23007	4.21728	0.988018	-0.00437212			ENSSSCG00000025756	61	71	4.01567	4.89025	0.998022	0.205439
ENSSSCG00000006901	57	82	2.78523	4.22057	0.94069	0.599667			ENSSSCG00000010148	24	20	4.02038	3.68424	0.99858	-0.262458
ENSSSCG00000010912	48	87	2.16702	4.22443	0.547179	0.963047			ENSSSCG00000024244	31	27	4.02118	3.78414	0.998528	-0.203374
ENSSSCG00000030424	80	100	3.57852	4.22866	0.974826	0.240859			ENSSSCG00000007147	78	113	4.02651	5.46787	0.984225	0.51893
ENSSSCG00000006418	102	74	5.23718	4.23251	0.946737	-0.307286			ENSSSCG00000008202	26	28	4.02853	4.19351	0.998707	0.0930411
ENSSSCG00000016981	49	51	3.82654	4.23264	0.988435	0.145519			ENSSSCG00000008491	37	31	4.02992	3.67745	0.998276	-0.258747
ENSSSCG00000004510	102	57	7.04127	4.23266	0.457566	-0.734264			ENSSSCG00000015908	71	55	4.03038	3.54744	0.996385	-0.373428
ENSSSCG00000003080	28	24	5.0686	4.23371	0.988973	-0.259668			ENSSSCG00000023028	22	20	4.03721	4.38538	0.99877	-0.141822
ENSSSCG00000011576	167	96	6.94564	4.23392	0.200775	-0.714112			ENSSSCG00000004999	65	47	4.0377	3.47571	0.994757	-0.470428
ENSSSCG00000024862	34	22	6.9096	4.23397	0.970521	-0.706581			ENSSSCG00000027665	6	10	4.0388	5.94141	0.998687	0.647465
ENSSSCG00000030110	66	94	3.08102	4.23588	0.935535	0.45927			ENSSSCG00000006857	186	152	4.03903	3.43062	0.995428	-0.300205
ENSSSCG00000023137	84	91	4.364	4.23637	0.986868	-0.0428123			ENSSSCG00000026038	47	47	4.04101	3.94956	0.998571	-0.0104394
ENSSSCG00000023482	84	63	4.83515	4.23752	0.965485	-0.190362			ENSSSCG00000007079	60	64	4.04419	4.63475	0.998451	0.0812355
ENSSSCG00000008903	96	174	2.41915	4.2416	0.0870247	0.810079			ENSSSCG00000008668	58	76	4.04423	5.99686	0.99619	0.374014
ENSSSCG00000006850	59	38	6.3388	4.24345	0.934033	-0.578955			ENSSSCG00000026681	44	61	4.04587	6.04637	0.995561	0.452454
ENSSSCG00000012926	60	96	2.80193	4.2444	0.806645	0.599155			ENSSSCG00000010215	34	38	4.04637	4.4063	0.998526	0.146015
ENSSSCG00000009430	318	221	5.60312	4.24533	0.724611	-0.400359			ENSSSCG00000025460	180	211	4.0516	4.58125	0.997347	0.217553
ENSSSCG00000022703	19	21	3.80836	4.24653	0.990762	0.157089			ENSSSCG00000022166	14	30	4.05397	8.08338	0.983157	1.04036
ENSSSCG00000029464	67	63	4.11218	4.24826	0.987663	0.0469752			ENSSSCG00000005288	106	94	4.05526	3.78325	0.997952	-0.182269
ENSSSCG00000003269	82	69	5.40252	4.25043	0.9823	-0.346029			ENSSSCG00000028551	26	29	4.05832	4.71888	0.998652	0.142052
ENSSSCG00000009083	108	59	7.09533	4.25417	0.332101	-0.737976			ENSSSCG00000026122	61	63	4.05876	5.03606	0.998503	0.0353616
ENSSSCG00000026815	11	11	4.00907	4.25539	0.993013	0.0860163			ENSSSCG00000028589	25	15	4.05926	2.59084	0.996205	-0.712822
ENSSSCG00000009389	38	31	4.53133	4.25662	0.985915	-0.0902235			ENSSSCG00000010529	58	101	4.06017	6.63044	0.875249	0.779933
ENSSSCG00000030467	71	54	5.26566	4.25908	0.972348	-0.306077			ENSSSCG00000028220	70	79	4.06252	4.26864	0.998174	0.161814
ENSSSCG00000001909	119	100	5.42401	4.2591	0.980156	-0.348809			ENSSSCG00000014391	205	227	4.06313	4.23327	0.998283	0.135832
ENSSSCG00000011278	149	182	3.4715	4.26249	0.973652	0.296141			ENSSSCG00000027683	119	98	4.06815	3.59541	0.996632	-0.288254
ENSSSCG00000027935	169	214	3.28559	4.26268	0.96102	0.375611			ENSSSCG00000000399	179	173	4.06866	4.08881	0.99855	-0.0595183
ENSSSCG00000005128	30	34	4.10625	4.26742	0.988582	0.0555183			ENSSSCG00000023837	145	200	4.07207	5.52439	0.979754	0.450813
ENSSSCG00000024740	82	118	3.22302	4.27235	0.906141	0.406643			ENSSSCG00000025041	23	21	4.07663	3.72033	0.998755	-0.136096
ENSSSCG00000025160	21	53	1.76288	4.27432	0.19365	1.27774			ENSSSCG00000000778	74	59	4.07896	3.52571	0.996874	-0.332736
ENSSSCG00000016850	210	198	3.94134	4.27688	0.988828	0.117894			ENSSSCG00000026412	376	428	4.08568	4.52424	0.998207	0.175821
ENSSSCG00000005626	46	57	3.57722	4.28026	0.981972	0.258881			ENSSSCG00000021879	14	10	4.09148	2.76844	0.998657	-0.459581
ENSSSCG00000009794	135	137	4.44615	4.28043	0.988503	-0.0548272			ENSSSCG00000004668	42	68	4.09256	6.47448	0.981848	0.672616
ENSSSCG00000004709	129	96	5.41082	4.28146	0.947344	-0.337726			ENSSSCG00000015011	28	27	4.09309	4.10144	0.99872	-0.0610375
ENSSSCG00000012437	113	99	4.23116	4.28382	0.984103	0.0178242			ENSSSCG00000011359	46	47	4.09576	4.173	0.998572	0.0199777
ENSSSCG00000004242	115	82	5.06103	4.2855	0.929284	-0.239959			ENSSSCG00000004980	94	128	4.09599	5.58889	0.990745	0.431073
ENSSSCG00000006294	8	16	1.97845	4.29394	0.975812	1.11788			ENSSSCG00000021134	144	105	4.09666	3.21335	0.985618	-0.46279
ENSSSCG00000010448	67	59	4.36887	4.29541	0.985811	-0.0244776			ENSSSCG00000025371	11	18	4.09921	6.88909	0.997773	0.655862
ENSSSCG00000001963	51	79	2.63761	4.29587	0.89656	0.703735			ENSSSCG00000008311	81	119	4.09978	5.6992	0.979398	0.539153
ENSSSCG00000022685	38	44	3.89564	4.2994	0.986931	0.14229			ENSSSCG00000022773	23	21	4.10007	3.42246	0.998755	-0.136096
ENSSSCG00000023865	98	113	3.57716	4.29996	0.983352	0.265506			ENSSSCG00000027375	15	16	4.10146	4.52337	0.998927	0.0777651
ENSSSCG00000021740	93	73	5.45945	4.30293	0.972655	-0.34346			ENSSSCG00000027774	183	195	4.10276	4.54468	0.998515	0.0805841
ENSSSCG00000011959	159	123	5.05299	4.30374	0.957935	-0.231563			ENSSSCG00000013246	28	29	4.10374	4.26728	0.998717	0.0387079
ENSSSCG00000010648	75	82	3.42315	4.30387	0.986694	0.330299			ENSSSCG00000014414	49	59	4.10601	5.02199	0.997907	0.25288
ENSSSCG00000009007	44	53	3.32395	4.30707	0.984293	0.373796			ENSSSCG00000028821	46	49	4.10622	5.04592	0.998523	0.0789447
ENSSSCG00000002625	6	9	2.65748	4.30722	0.992261	0.696681			ENSSSCG00000008561	12	12	4.10851	3.73497	0.999029	-0.00987715
ENSSSCG00000002429	79	89	3.69106	4.30791	0.985348	0.222934			ENSSSCG00000003097	67	87	4.1095	4.72543	0.99599	0.361762
ENSSSCG00000030514	53	35	5.93486	4.30835	0.952182	-0.462072			ENSSSCG00000004122	82	83	4.11044	4.31163	0.998486	0.00676348
ENSSSCG00000026527	21	67	1.36418	4.30941	0.00302707	1.65943			ENSSSCG00000021155	44	48	4.11103	4.06147	0.998485	0.112591
ENSSSCG00000023464	14	28	2.241	4.31181	0.931385	0.944148			ENSSSCG00000030142	18	30	4.11116	6.47406	0.995367	0.697943
ENSSSCG00000008202	22	29	3.27601	4.31885	0.985492	0.398729			ENSSSCG00000022162	225	295	4.11245	5.05721	0.98653	0.378763
ENSSSCG00000029852	65	114	2.32314	4.32139	0.438587	0.895448			ENSSSCG00000003905	90	52	4.11431	2.3693	0.901638	-0.791105
ENSSSCG00000023142	38	42	4.11848	4.32321	0.988195	0.0699806			ENSSSCG00000017605	34	26	4.11531	3.47273	0.997852	-0.385503
ENSSSCG00000030713	21	18	4.47227	4.32574	0.990305	-0.0480834			ENSSSCG00000028081	27	33	4.11726	4.53243	0.998339	0.270372
ENSSSCG00000008282	25	39	2.84981	4.32646	0.963088	0.60234			ENSSSCG00000012917	112	134	4.12517	4.62379	0.997172	0.246204
ENSSSCG00000015414	84	110	2.90282	4.328	0.962802	0.576255			ENSSSCG00000011278	176	163	4.12547	3.88688	0.998307	-0.120684
ENSSSCG00000001792	52	55	3.76102	4.3284	0.988111	0.202718			ENSSSCG00000002005	136	174	4.13216	5.14071	0.993877	0.342744
ENSSSCG00000027774	168	185	3.81346	4.32842	0.986695	0.182718			ENSSSCG00000015931	42	39	4.13222	4.38183	0.998528	-0.114905
ENSSSCG00000008159	52	44	4.51451	4.33014	0.985316	-0.0601659			ENSSSCG00000028538	133	123	4.13247	4.36668	0.998259	-0.122519
ENSSSCG00000000665	45	34	5.3233	4.33261	0.979796	-0.297088			ENSSSCG00000014329	64	46	4.13339	3.18432	0.994634	-0.478791
ENSSSCG00000023341	40	28	5.78846	4.33459	0.974846	-0.417291			ENSSSCG00000003663	20	25	4.13586	5.13848	0.998486	0.298758
ENSSSCG00000016808	26	24	4.46896	4.33659	0.990121	-0.0433877			ENSSSCG00000024536	88	114	4.14051	5.45339	0.995059	0.359445
ENSSSCG00000005921	327	406	3.82452	4.33789	0.966503	0.181726			ENSSSCG00000009832	19	29	4.14183	5.68999	0.996946	0.576284
ENSSSCG00000002495	104	142	3.26157	4.33988	0.932914	0.412082			ENSSSCG00000015853	163	177	4.14234	4.72607	0.998373	0.107637
ENSSSCG00000016459	308	135	10.3921	4.34071	5.83629e-06	-1.25949			ENSSSCG00000007914	47	54	4.14236	4.54303	0.998261	0.186191
ENSSSCG00000023978	50	62	3.36979	4.34148	0.981104	0.365531			ENSSSCG00000025576	19	12	4.14431	2.85559	0.997731	-0.634012
ENSSSCG00000012521	92	99	3.78725	4.34334	0.987033	0.197622			ENSSSCG00000016808	25	34	4.14625	5.88239	0.997679	0.419451
ENSSSCG00000025747	43	53	3.07789	4.34531	0.982989	0.497509			ENSSSCG00000006664	81	60	4.14681	3.12413	0.994319	-0.43771
ENSSSCG00000002431	36	73	2.07881	4.34855	0.369074	1.0648			ENSSSCG00000025994	58	45	4.14914	3.62217	0.996965	-0.369981
ENSSSCG00000003815	66	51	4.87263	4.34955	0.975967	-0.163809			ENSSSCG00000017930	81	96	4.15953	4.8075	0.997626	0.232001
ENSSSCG00000012663	43	47	1.55039	4.35419	0.988018	1.48977			ENSSSCG00000024996	13	20	4.16005	6.47018	0.997893	0.577131
ENSSSCG00000026730	53	36	6.03068	4.35569	0.959677	-0.469421			ENSSSCG00000012125	117	99	4.16097	3.72782	0.997252	-0.249484
ENSSSCG00000002267	74	165	2.18616	4.35991	0.00121727	0.99587			ENSSSCG00000017533	37	30	4.16108	3.03887	0.998114	-0.304639
ENSSSCG00000002724	46	37	5.45266	4.36163	0.983741	-0.322113			ENSSSCG00000008449	72	61	4.16317	3.80583	0.997757	-0.246353
ENSSSCG00000002357	57	45	5.21812	4.36614	0.980254	-0.257179			ENSSSCG00000026495	42	51	4.16365	4.84881	0.997984	0.264114
ENSSSCG00000004529	52	50	4.01438	4.36671	0.988401	0.121359			ENSSSCG00000024556	100	92	4.16559	4.02145	0.998243	-0.129676
ENSSSCG00000026636	193	163	5.75232	4.372	0.97938	-0.395846			ENSSSCG00000002771	159	188	4.16845	4.83139	0.997183	0.229814
ENSSSCG00000004347	75	58	5.15124	4.3722	0.973886	-0.236549			ENSSSCG00000030126	114	86	4.16969	3.6683	0.992859	-0.413353
ENSSSCG00000000167	61	61	4.15713	4.37316	0.988287	0.0731119			ENSSSCG00000004763	15	16	4.16973	4.0793	0.998927	0.0777651
ENSSSCG00000009302	106	110	4.00295	4.37412	0.987903	0.127905			ENSSSCG00000025254	64	33	4.17208	2.49851	0.892785	-0.946634
ENSSSCG00000026120	41	22	7.54547	4.37935	0.891293	-0.784883			ENSSSCG00000011041	67	64	4.17344	4.2788	0.998449	-0.0756554
ENSSSCG00000028711	137	31	17.3714	4.37981	4.99722e-10	-1.98778			ENSSSCG00000029841	56	71	4.17721	5.04869	0.997046	0.326884
ENSSSCG00000009071	216	166	5.32504	4.38429	0.946904	-0.280435			ENSSSCG00000006492	10	9	4.17759	3.51492	0.999083	-0.148044
ENSSSCG00000021519	21	33	2.67671	4.38667	0.969506	0.712681			ENSSSCG00000030283	67	84	4.17796	6.049	0.996915	0.311686
ENSSSCG00000022302	199	291	3.52199	4.38754	0.680721	0.317004			ENSSSCG00000010300	50	42	4.17911	3.70382	0.998029	-0.256933
ENSSSCG00000006002	103	69	6.38321	4.38758	0.888107	-0.540848			ENSSSCG00000003770	78	80	4.18072	5.01968	0.998481	0.0255757
ENSSSCG00000005725	68	73	4.11612	4.38761	0.98735	0.092154			ENSSSCG00000009870	47	58	4.18106	5.04423	0.997709	0.287583
ENSSSCG00000028284	61	76	3.74677	4.38995	0.978514	0.228562			ENSSSCG00000030544	114	117	4.18888	4.10818	0.998494	0.0266119
ENSSSCG00000022504	39	62	2.51039	4.39103	0.915312	0.806632			ENSSSCG00000017774	126	128	4.1923	4.20828	0.99852	0.0119845
ENSSSCG00000029552	88	54	6.29102	4.39264	0.804839	-0.518214			ENSSSCG00000023195	108	86	4.19368	3.91488	0.995859	-0.336001
ENSSSCG00000027415	30	28	4.65067	4.39346	0.989707	-0.0820772			ENSSSCG00000016778	49	41	4.19804	4.15687	0.998022	-0.262322
ENSSSCG00000012479	70	81	3.88534	4.39384	0.984182	0.177443			ENSSSCG00000029348	89	78	4.19934	4.07677	0.997924	-0.198745
ENSSSCG00000005574	35	47	3.19432	4.39411	0.977781	0.460068			ENSSSCG00000023626	27	41	4.20131	6.10872	0.995379	0.57572
ENSSSCG00000020657	151	121	5.47208	4.3959	0.970129	-0.315936			ENSSSCG00000029150	78	77	4.20311	4.47555	0.99848	-0.0289138
ENSSSCG00000014868	117	127	3.86107	4.40069	0.986804	0.188721			ENSSSCG00000024817	179	184	4.20412	4.59279	0.998614	0.0289497
ENSSSCG00000028239	120	112	4.67464	4.40496	0.987227	-0.0857009			ENSSSCG00000017806	105	130	4.20538	5.2003	0.996349	0.295108
ENSSSCG00000004924	23	21	4.94487	4.40504	0.990487	-0.166799			ENSSSCG00000004631	55	48	4.20738	4.19682	0.998185	-0.203339
ENSSSCG00000014074	97	75	5.14842	4.4084	0.968915	-0.223869			ENSSSCG00000003881	34	35	4.20813	4.66788	0.998655	0.0303498
ENSSSCG00000005062	212	112	7.36511	4.40899	0.0151654	-0.740254			ENSSSCG00000008169	113	100	4.20884	3.73651	0.997907	-0.185338
ENSSSCG00000007590	128	126	4.36073	4.41568	0.988363	0.0180824			ENSSSCG00000030294	191	202	4.20962	4.47876	0.998565	0.0698029
ENSSSCG00000003393	143	189	3.72073	4.41824	0.941078	0.247885			ENSSSCG00000014946	206	215	4.2098	4.93502	0.998642	0.0508191
ENSSSCG00000000142	131	224	2.61712	4.41876	0.119826	0.755686			ENSSSCG00000025357	125	119	4.21321	4.38018	0.998407	-0.0809924
ENSSSCG00000008335	59	55	4.59494	4.42488	0.987749	-0.0543886			ENSSSCG00000012251	172	141	4.21418	3.98326	0.995751	-0.295582
ENSSSCG00000029285	35	27	4.93777	4.42527	0.984277	-0.158093			ENSSSCG00000007932	49	60	4.21709	4.88078	0.997743	0.276751
ENSSSCG00000023195	88	86	3.84835	4.42628	0.987965	0.201842			ENSSSCG00000021051	80	89	4.21709	4.78449	0.99822	0.141588
ENSSSCG00000005604	75	78	4.04071	4.42723	0.987833	0.131789			ENSSSCG00000006900	29	34	4.21846	5.3756	0.99846	0.212497
ENSSSCG00000024095	24	17	5.44717	4.42806	0.984952	-0.298827			ENSSSCG00000026753	62	75	4.21931	5.17576	0.997618	0.260398
ENSSSCG00000028651	10	7	6.15315	4.42828	0.992072	-0.474584			ENSSSCG00000010635	56	31	4.21957	2.57421	0.965056	-0.844569
ENSSSCG00000017737	77	61	5.89231	4.42986	0.976813	-0.411557			ENSSSCG00000016716	138	144	4.21973	4.76606	0.998502	0.0504187
ENSSSCG00000022905	20	22	3.99546	4.43052	0.990621	0.149093			ENSSSCG00000008062	81	116	4.22043	5.64829	0.985608	0.502608
ENSSSCG00000011052	33	35	4.13623	4.43127	0.989285	0.0994241			ENSSSCG00000009966	112	136	4.22275	4.63545	0.996816	0.26743
ENSSSCG00000022223	24	14	6.15368	4.4322	0.972323	-0.473431			ENSSSCG00000015683	117	94	4.22285	3.88715	0.995929	-0.323531
ENSSSCG00000026654	41	68	2.89974	4.43352	0.86127	0.612542			ENSSSCG00000027016	64	86	4.22339	5.36207	0.99485	0.410424
ENSSSCG00000004065	113	134	3.58377	4.43624	0.980065	0.307834			ENSSSCG00000017303	95	66	4.22496	3.21021	0.98704	-0.529813
ENSSSCG00000004135	105	84	5.00403	4.43762	0.974218	-0.173302			ENSSSCG00000007720	133	142	4.22587	4.36871	0.998418	0.0832506
ENSSSCG00000010108	91	108	3.97359	4.43918	0.98092	0.159853			ENSSSCG00000004457	207	194	4.22788	4.38495	0.998444	-0.103737
ENSSSCG00000025980	37	75	1.9225	4.44192	0.344314	1.20819			ENSSSCG00000010251	133	102	4.23171	3.67172	0.9929	-0.390359
ENSSSCG00000022710	21	20	4.83489	4.44306	0.990983	-0.121919			ENSSSCG00000000148	24	38	4.23184	6.67615	0.994821	0.632563
ENSSSCG00000009717	63	55	4.55411	4.44485	0.985691	-0.035015			ENSSSCG00000010502	88	73	4.23189	4.01946	0.997256	-0.277016
ENSSSCG00000022177	51	73	3.14778	4.44557	0.950427	0.498034			ENSSSCG00000003747	46	54	4.23254	5.33049	0.99815	0.216608
ENSSSCG00000008574	95	104	3.98181	4.45131	0.986424	0.160806			ENSSSCG00000017565	96	81	4.23341	3.44563	0.997414	-0.253071
ENSSSCG00000012925	44	56	3.69685	4.45228	0.98006	0.268235			ENSSSCG00000003147	30	37	4.23433	4.9765	0.998199	0.283929
ENSSSCG00000027055	375	206	8.13123	4.45375	0.00414367	-0.868432			ENSSSCG00000016451	48	43	4.23812	3.50731	0.998375	-0.165926
ENSSSCG00000030073	83	73	5.04363	4.45434	0.985066	-0.179255			ENSSSCG00000009215	17	24	4.23851	5.20308	0.998035	0.465211
ENSSSCG00000006093	83	103	3.22815	4.45686	0.975622	0.465311			ENSSSCG00000023966	54	51	4.24019	4.15676	0.998477	-0.0914782
ENSSSCG00000003888	60	77	3.2089	4.45714	0.974564	0.474026			ENSSSCG00000002544	291	250	4.24098	3.43317	0.997079	-0.228943
ENSSSCG00000011125	175	117	6.72389	4.46449	0.757945	-0.5908			ENSSSCG00000012634	206	173	4.2423	4.06122	0.996447	-0.261223
ENSSSCG00000007286	201	160	5.51512	4.47198	0.964849	-0.302467			ENSSSCG00000021263	8	5	4.2489	2.4106	0.998924	-0.59942
ENSSSCG00000016777	100	74	6.32214	4.47654	0.955666	-0.498033			ENSSSCG00000020868	106	111	4.25011	4.91622	0.998452	0.0553705
ENSSSCG00000025668	34	22	6.25417	4.47672	0.970521	-0.48239			ENSSSCG00000024958	49	70	4.25738	5.91508	0.993491	0.495964
ENSSSCG00000014262	61	50	6.13929	4.48058	0.982466	-0.454382			ENSSSCG00000002499	28	24	4.26095	3.62084	0.998549	-0.224914
ENSSSCG00000020930	89	46	7.55435	4.4808	0.3218	-0.753561			ENSSSCG00000013248	235	272	4.26147	4.91666	0.997636	0.19956
ENSSSCG00000029684	44	23	7.63395	4.481	0.85032	-0.768618			ENSSSCG00000021341	22	14	4.26267	3.03419	0.997387	-0.628929
ENSSSCG00000015862	66	55	5.49871	4.48203	0.98299	-0.294948			ENSSSCG00000026302	479	428	4.26527	3.78123	0.998338	-0.172705
ENSSSCG00000030649	42	57	3.14635	4.48208	0.972463	0.510473			ENSSSCG00000022534	149	116	4.26541	3.76425	0.993284	-0.3692
ENSSSCG00000007648	45	45	4.71202	4.48506	0.988835	-0.0711994			ENSSSCG00000029687	55	51	4.26704	3.99716	0.998427	-0.117505
ENSSSCG00000014267	149	166	3.50765	4.48611	0.985743	0.354936			ENSSSCG00000014255	108	96	4.2698	4.0175	0.997967	-0.178927
ENSSSCG00000012732	70	54	6.31254	4.48612	0.974745	-0.49275			ENSSSCG00000000164	80	81	4.27451	4.40832	0.998487	0.00719108
ENSSSCG00000009308	103	94	5.0343	4.48884	0.986392	-0.165461			ENSSSCG00000009084	67	57	4.27527	4.01712	0.997862	-0.240206
ENSSSCG00000029985	154	129	5.33224	4.48914	0.97864	-0.248305			ENSSSCG00000015364	60	73	4.27648	5.03201	0.997581	0.268486
ENSSSCG00000022711	40	44	4.42372	4.49138	0.988119	0.0219117			ENSSSCG00000002145	77	62	4.27852	3.64421	0.996971	-0.31891
ENSSSCG00000001546	74	72	4.86828	4.49329	0.987991	-0.115643			ENSSSCG00000005729	187	204	4.28049	4.60934	0.998381	0.114336
ENSSSCG00000030139	90	77	5.35903	4.49852	0.983085	-0.25252			ENSSSCG00000004775	27	17	4.28226	2.7564	0.996505	-0.64947
ENSSSCG00000008216	123	110	4.51025	4.50205	0.985336	-0.00262529			ENSSSCG00000023917	14	6	4.28285	1.99584	0.99573	-1.11626
ENSSSCG00000000745	58	103	2.63874	4.50468	0.476089	0.771604			ENSSSCG00000008812	154	161	4.2882	4.89468	0.998527	0.0531672
ENSSSCG00000003573	115	121	3.81126	4.50572	0.987735	0.241468			ENSSSCG00000000770	260	352	4.28931	5.56176	0.970069	0.425097
ENSSSCG00000000275	134	125	4.84227	4.50593	0.98733	-0.103877			ENSSSCG00000016966	12	13	4.29059	5.16894	0.999	0.0975232
ENSSSCG00000010188	77	89	3.6462	4.50598	0.983897	0.305454			ENSSSCG00000004979	107	100	4.29281	4.44214	0.99832	-0.107287
ENSSSCG00000013308	50	34	5.93714	4.50602	0.96271	-0.397911			ENSSSCG00000005097	46	40	4.29301	4.07153	0.998281	-0.207746
ENSSSCG00000020668	42	45	4.19894	4.50814	0.988444	0.102508			ENSSSCG00000023114	51	51	4.29499	4.3253	0.998551	-0.0104554
ENSSSCG00000011658	77	71	4.32338	4.51221	0.987023	0.0616647			ENSSSCG00000026851	25	39	4.29526	6.85014	0.995027	0.612411
ENSSSCG00000013984	122	127	4.01601	4.51507	0.988025	0.168999			ENSSSCG00000011632	79	84	4.2961	4.9152	0.998415	0.0770049
ENSSSCG00000006873	35	37	3.87204	4.51803	0.989141	0.222605			ENSSSCG00000009075	112	115	4.29689	5.07171	0.998492	0.0272631
ENSSSCG00000012054	207	287	3.26146	4.51816	0.852384	0.470213			ENSSSCG00000023166	78	88	4.2969	4.78988	0.998137	0.161557
ENSSSCG00000003828	41	43	4.20632	4.51832	0.988781	0.103228			ENSSSCG00000029613	174	201	4.29757	5.1037	0.997663	0.196477
ENSSSCG00000028503	71	62	5.22337	4.51848	0.985237	-0.209145			ENSSSCG00000025402	30	28	4.29814	4.25415	0.998667	-0.106737
ENSSSCG00000005657	155	256	2.91352	4.5189	0.168107	0.633218			ENSSSCG00000027211	132	151	4.29819	5.46664	0.997855	0.182155
ENSSSCG00000023157	54	54	4.71393	4.51977	0.988473	-0.0606622			ENSSSCG00000004010	140	163	4.30082	4.99955	0.997567	0.207512
ENSSSCG00000017227	83	102	3.85644	4.52233	0.97715	0.229802			ENSSSCG00000010881	8	11	4.30101	5.79654	0.9989	0.407961
ENSSSCG00000025869	80	68	5.53569	4.53097	0.983176	-0.288936			ENSSSCG00000025113	8	9	4.30328	4.88055	0.999124	0.143454
ENSSSCG00000029120	42	44	4.60693	4.53139	0.988731	-0.0238394			ENSSSCG00000023027	45	39	4.30341	4.11192	0.998281	-0.212351
ENSSSCG00000022734	239	188	5.79989	4.53189	0.957777	-0.355912			ENSSSCG00000004328	378	430	4.30646	5.10511	0.998223	0.174897
ENSSSCG00000012122	60	51	5.31012	4.53329	0.984714	-0.228177			ENSSSCG00000029002	41	66	4.30789	6.51652	0.983895	0.664144
ENSSSCG00000021184	100	54	7.06307	4.53337	0.357834	-0.639708			ENSSSCG00000003995	100	104	4.30973	5.05481	0.998462	0.0455187
ENSSSCG00000021200	43	34	5.45731	4.53585	0.983437	-0.266799			ENSSSCG00000016123	67	70	4.3102	4.68918	0.998473	0.0518383
ENSSSCG00000024512	34	22	6.40251	4.53641	0.970521	-0.497087			ENSSSCG00000010882	27	16	4.31021	2.59657	0.995514	-0.73222
ENSSSCG00000016858	56	36	5.96075	4.5379	0.938374	-0.393481			ENSSSCG00000005018	35	24	4.31378	3.23776	0.996627	-0.537515
ENSSSCG00000015302	38	43	3.75905	4.53892	0.987632	0.271955			ENSSSCG00000008227	21	21	4.31391	4.44786	0.99883	-0.0101931
ENSSSCG00000010163	49	48	4.52478	4.53929	0.988629	0.00461581			ENSSSCG00000017669	40	33	4.3155	3.95929	0.998131	-0.280935
ENSSSCG00000001795	39	41	4.00486	4.5424	0.988891	0.181689			ENSSSCG00000014835	248	300	4.31891	5.2586	0.996088	0.263072
ENSSSCG00000029687	49	58	3.75605	4.547	0.984603	0.27568			ENSSSCG00000015604	71	57	4.3199	3.58392	0.997079	-0.322748
ENSSSCG00000023614	51	47	4.66796	4.54766	0.987906	-0.0376675			ENSSSCG00000010130	187	198	4.32285	4.45057	0.998551	0.0714674
ENSSSCG00000007349	60	77	3.56201	4.54838	0.974564	0.352672			ENSSSCG00000012035	202	187	4.32482	4.29058	0.998341	-0.12138
ENSSSCG00000003552	27	25	4.70887	4.54875	0.99001	-0.0499041			ENSSSCG00000023909	28	32	4.32783	4.78999	0.99856	0.176478
ENSSSCG00000008605	4	9	1.97497	4.54892	0.986773	1.20367			ENSSSCG00000006718	86	103	4.32924	4.84254	0.997414	0.247129
ENSSSCG00000012416	81	66	4.33645	4.5508	0.979478	0.0695891			ENSSSCG00000005291	97	124	4.3303	5.5243	0.995312	0.340723
ENSSSCG00000006779	69	38	7.22692	4.55154	0.710637	-0.667035			ENSSSCG00000022281	9	14	4.33066	6.44349	0.99844	0.578263
ENSSSCG00000012356	9	16	2.42696	4.55257	0.982188	0.907517			ENSSSCG00000027790	74	65	4.33215	4.23727	0.998046	-0.195099
ENSSSCG00000003451	26	23	5.27406	4.55615	0.989738	-0.211094			ENSSSCG00000025335	67	64	4.33303	4.55294	0.998449	-0.0756554
ENSSSCG00000012181	59	54	4.76727	4.55635	0.98738	-0.065278			ENSSSCG00000009462	15	14	4.33798	4.09173	0.998943	-0.103499
ENSSSCG00000009326	86	71	4.96619	4.55995	0.980303	-0.123109			ENSSSCG00000003041	44	35	4.33946	3.43263	0.99777	-0.332843
ENSSSCG00000016271	24	27	3.96695	4.55998	0.989639	0.200985			ENSSSCG00000006936	56	44	4.33978	3.93138	0.997228	-0.351921
ENSSSCG00000010672	30	36	3.39714	4.56173	0.986982	0.425268			ENSSSCG00000021510	7	10	4.3405	6.18352	0.998918	0.453056
ENSSSCG00000015422	49	39	5.12116	4.56177	0.982518	-0.166879			ENSSSCG00000013084	32	40	4.34074	5.48183	0.998046	0.303334
ENSSSCG00000011782	124	120	4.51518	4.5621	0.988114	0.0149082			ENSSSCG00000003998	90	86	4.34504	3.85816	0.998412	-0.0754333
ENSSSCG00000016701	72	77	5.08109	4.56319	0.987365	-0.155095			ENSSSCG00000020930	56	54	4.34734	4.73509	0.998503	-0.0620587
ENSSSCG00000002658	32	53	3.1051	4.56746	0.914184	0.556765			ENSSSCG00000011569	141	126	4.34832	3.88845	0.997953	-0.171713
ENSSSCG00000015715	70	63	5.61409	4.56774	0.986481	-0.297587			ENSSSCG00000009042	130	143	4.35346	4.87643	0.998246	0.125991
ENSSSCG00000005367	198	156	5.48008	4.57073	0.961156	-0.261787			ENSSSCG00000004465	25	22	4.35513	3.95139	0.998666	-0.187583
ENSSSCG00000007896	53	45	5.31287	4.57301	0.985354	-0.216359			ENSSSCG00000016427	21	11	4.35813	2.54723	0.995197	-0.888005
ENSSSCG00000029189	599	540	5.55672	4.57372	0.991587	-0.280867			ENSSSCG00000009943	136	192	4.35845	5.9269	0.972301	0.484037
ENSSSCG00000005017	112	86	5.15179	4.57753	0.963944	-0.170517			ENSSSCG00000016611	162	154	4.36178	4.44737	0.998449	-0.0832177
ENSSSCG00000015982	77	81	4.73731	4.58892	0.98764	-0.0459167			ENSSSCG00000013564	193	187	4.36222	4.58689	0.998587	-0.0559343
ENSSSCG00000020904	13	13	4.34424	4.59155	0.99251	0.0799064			ENSSSCG00000028200	267	261	4.36314	4.35944	0.998772	-0.0432838
ENSSSCG00000025669	45	17	12.1722	4.59347	0.267708	-1.40592			ENSSSCG00000015286	188	179	4.36382	4.30727	0.998503	-0.0810071
ENSSSCG00000005224	28	31	4.2273	4.59442	0.989284	0.12014			ENSSSCG00000008385	43	50	4.36439	5.75023	0.99825	0.202848
ENSSSCG00000006885	61	65	4.21998	4.59486	0.987679	0.12279			ENSSSCG00000013616	86	96	4.36577	4.64154	0.998181	0.146541
ENSSSCG00000022162	232	286	3.99406	4.5961	0.969233	0.20254			ENSSSCG00000004607	42	45	4.36852	4.94079	0.998541	0.0870155
ENSSSCG00000027878	7	13	2.60788	4.59648	0.984856	0.817647			ENSSSCG00000016117	127	99	4.3697	3.97658	0.994269	-0.366906
ENSSSCG00000022998	25	51	2.44228	4.59862	0.682283	0.912954			ENSSSCG00000014439	50	56	4.37007	4.5973	0.998349	0.150195
ENSSSCG00000026576	111	133	3.5211	4.59875	0.978746	0.385231			ENSSSCG00000002502	176	148	4.37186	4.0354	0.996661	-0.259121
ENSSSCG00000024818	56	71	3.41378	4.59908	0.977366	0.429973			ENSSSCG00000004684	64	43	4.3721	3.38632	0.991061	-0.574076
ENSSSCG00000023861	128	194	3.18045	4.60082	0.677546	0.532631			ENSSSCG00000027768	58	56	4.37247	3.80888	0.998497	-0.0602836
ENSSSCG00000009030	97	86	4.64621	4.60487	0.985112	-0.0128814			ENSSSCG00000016043	62	64	4.37435	5.31907	0.998501	0.0346419
ENSSSCG00000016563	77	60	5.21913	4.60507	0.974564	-0.180569			ENSSSCG00000013644	274	326	4.37554	5.2995	0.996816	0.239299
ENSSSCG00000022499	27	38	3.63442	4.60808	0.977544	0.342455			ENSSSCG00000013230	22	33	4.37648	6.18429	0.996692	0.554927
ENSSSCG00000021502	19	30	2.7416	4.60829	0.972519	0.749217			ENSSSCG00000008125	76	70	4.37683	4.29117	0.998306	-0.127654
ENSSSCG00000004018	222	362	2.94495	4.60995	0.103749	0.646499			ENSSSCG00000010319	133	113	4.37843	4.30851	0.997205	-0.243887
ENSSSCG00000023945	168	145	5.15525	4.61177	0.982343	-0.160726			ENSSSCG00000021450	64	54	4.37941	3.73281	0.997831	-0.251748
ENSSSCG00000012112	105	92	4.22953	4.61229	0.984252	0.124999			ENSSSCG00000021946	52	45	4.37974	4.37106	0.998177	-0.21507
ENSSSCG00000005314	17	37	2.13393	4.61245	0.793379	1.11206			ENSSSCG00000023658	24	30	4.38039	5.40547	0.998332	0.300774
ENSSSCG00000005197	21	15	5.90633	4.61764	0.986773	-0.355111			ENSSSCG00000026193	56	68	4.38153	5.66151	0.997684	0.265431
ENSSSCG00000005320	96	123	3.66972	4.61806	0.96642	0.331637			ENSSSCG00000017673	141	132	4.38189	4.67088	0.99834	-0.105084
ENSSSCG00000015908	80	64	4.93064	4.61923	0.977544	-0.0941202			ENSSSCG00000001787	148	161	4.38249	4.78053	0.998339	0.110148
ENSSSCG00000007540	133	151	4.34041	4.62135	0.984269	0.090502			ENSSSCG00000024720	20	20	4.3859	4.62198	0.998848	-0.0101714
ENSSSCG00000005015	85	75	4.51358	4.62334	0.985162	0.0346444			ENSSSCG00000007637	67	70	4.38603	4.4966	0.998473	0.0518383
ENSSSCG00000021537	124	113	5.05294	4.62368	0.986319	-0.128064			ENSSSCG00000000285	47	40	4.38633	3.60481	0.998161	-0.238163
ENSSSCG00000025245	79	120	3.33223	4.6262	0.832285	0.473353			ENSSSCG00000025691	45	42	4.3875	4.19238	0.998512	-0.107861
ENSSSCG00000010149	14	15	4.2853	4.62771	0.992052	0.110899			ENSSSCG00000009713	84	69	4.38784	3.76955	0.997164	-0.29086
ENSSSCG00000021918	126	110	4.81546	4.62956	0.983668	-0.0567981			ENSSSCG00000022668	66	56	4.39018	4.23359	0.997852	-0.243928
ENSSSCG00000025844	29	34	3.98298	4.63066	0.987908	0.217375			ENSSSCG00000020668	44	43	4.39067	4.37244	0.99858	-0.0428915
ENSSSCG00000010684	39	46	3.68227	4.63284	0.986096	0.331277			ENSSSCG00000014267	204	229	4.39281	5.61339	0.998126	0.155458
ENSSSCG00000001577	107	127	3.93953	4.63351	0.980169	0.23409			ENSSSCG00000014038	165	168	4.39371	4.28245	0.998593	0.0152622
ENSSSCG00000017406	185	138	6.21748	4.6362	0.931683	-0.423392			ENSSSCG00000004538	98	107	4.39621	5.27842	0.998293	0.115058
ENSSSCG00000018057	65	80	3.9585	4.63743	0.979298	0.228362			ENSSSCG00000026576	147	129	4.40229	4.23896	0.997708	-0.197748
ENSSSCG00000003438	363	390	4.10312	4.63804	0.991045	0.176789			ENSSSCG00000008583	195	205	4.40531	5.07468	0.998595	0.0612161
ENSSSCG00000023933	55	77	3.4891	4.64229	0.955139	0.411985			ENSSSCG00000012691	29	32	4.40541	4.93936	0.998625	0.127456
ENSSSCG00000005125	19	29	2.43139	4.64317	0.976843	0.933332			ENSSSCG00000016368	16	24	4.40804	6.2582	0.997654	0.547994
ENSSSCG00000026276	177	172	4.58498	4.64535	0.989006	0.0188811			ENSSSCG00000000386	117	141	4.41005	5.33257	0.996957	0.256667
ENSSSCG00000012315	126	156	3.78567	4.64707	0.9717	0.295771			ENSSSCG00000006840	113	79	4.41264	3.41949	0.983607	-0.52185
ENSSSCG00000012607	98	59	5.67231	4.64765	0.717249	-0.287417			ENSSSCG00000007543	101	106	4.41376	4.15246	0.998443	0.0585324
ENSSSCG00000024897	57	42	5.42648	4.6477	0.972463	-0.223505			ENSSSCG00000017407	67	57	4.41623	3.48208	0.997862	-0.240206
ENSSSCG00000005611	70	77	4.08644	4.64996	0.986602	0.1864			ENSSSCG00000025792	86	105	4.41891	5.14929	0.997055	0.274626
ENSSSCG00000001667	263	282	4.04502	4.65757	0.989586	0.203447			ENSSSCG00000013526	143	173	4.4191	5.24273	0.996613	0.262546
ENSSSCG00000003901	83	104	3.91044	4.66146	0.973927	0.253478			ENSSSCG00000009007	63	68	4.42077	5.24554	0.998408	0.0981326
ENSSSCG00000000588	116	97	4.95798	4.6654	0.979709	-0.0877575			ENSSSCG00000009446	235	256	4.42231	5.11273	0.998486	0.112407
ENSSSCG00000022307	124	120	4.79185	4.67151	0.988114	-0.0367119			ENSSSCG00000017502	95	113	4.42424	5.24746	0.997435	0.237529
ENSSSCG00000022224	65	59	4.99987	4.67245	0.986927	-0.0977046			ENSSSCG00000015356	17	9	4.42502	2.58977	0.996734	-0.862014
ENSSSCG00000002397	73	88	3.93653	4.6727	0.980601	0.247343			ENSSSCG00000016986	63	64	4.42807	4.99266	0.99851	0.0118975
ENSSSCG00000025430	54	63	4.31099	4.67359	0.98487	0.116512			ENSSSCG00000004765	84	94	4.42894	5.03968	0.99817	0.150044
ENSSSCG00000013387	22	17	5.85145	4.6742	0.988393	-0.324087			ENSSSCG00000017538	45	46	4.42982	4.65024	0.998577	0.0206372
ENSSSCG00000014430	40	87	2.24746	4.6777	0.0923353	1.05748			ENSSSCG00000012416	97	107	4.43194	6.6706	0.998235	0.129715
ENSSSCG00000002430	21	15	5.81189	4.67926	0.986773	-0.312717			ENSSSCG00000011619	55	67	4.43348	5.26239	0.997667	0.269916
ENSSSCG00000013568	173	179	4.63148	4.68068	0.988946	0.0152448			ENSSSCG00000027489	100	132	4.4405	5.66625	0.993196	0.386732
ENSSSCG00000014162	8	9	3.59744	4.6864	0.993581	0.381526			ENSSSCG00000024134	121	124	4.44198	4.44478	0.998505	0.0244987
ENSSSCG00000009234	40	25	6.66065	4.68805	0.956415	-0.50667			ENSSSCG00000001534	149	164	4.44321	4.74626	0.998256	0.126976
ENSSSCG00000028445	46	37	6.11	4.69282	0.983741	-0.380723			ENSSSCG00000003741	76	70	4.4468	4.5188	0.998306	-0.127654
ENSSSCG00000015522	101	51	8.37343	4.69332	0.165508	-0.835211			ENSSSCG00000007544	154	163	4.45027	4.62582	0.998487	0.0708758
ENSSSCG00000018053	71	86	4.1386	4.69957	0.980303	0.183395			ENSSSCG00000010167	75	51	4.45721	3.29228	0.989404	-0.558538
ENSSSCG00000023576	26	18	6.19118	4.7013	0.982779	-0.397159			ENSSSCG00000006470	68	58	4.46282	3.58149	0.997871	-0.2366
ENSSSCG00000000509	114	95	5.06707	4.70466	0.979394	-0.107058			ENSSSCG00000015667	62	53	4.46431	4.12427	0.997967	-0.233114
ENSSSCG00000011414	11	15	3.36175	4.70894	0.990137	0.486156			ENSSSCG00000009512	94	118	4.46497	5.61685	0.996134	0.314607
ENSSSCG00000000874	40	55	4.63141	4.70944	0.971426	0.0240949			ENSSSCG00000016848	111	122	4.46972	5.06405	0.998248	0.124672
ENSSSCG00000021443	103	60	7.54519	4.71775	0.591206	-0.677445			ENSSSCG00000010741	143	133	4.4721	4.45635	0.998302	-0.114459
ENSSSCG00000028220	67	94	3.6011	4.71888	0.943257	0.390013			ENSSSCG00000006143	22	12	4.47423	2.61724	0.995525	-0.836286
ENSSSCG00000030265	17	27	2.69195	4.7201	0.975404	0.810139			ENSSSCG00000021354	49	56	4.47446	5.59248	0.998266	0.178802
ENSSSCG00000000363	150	181	3.93146	4.72054	0.976222	0.26386			ENSSSCG00000001974	116	96	4.47741	4.48859	0.996797	-0.281169
ENSSSCG00000015403	66	64	4.18683	4.72115	0.988075	0.173306			ENSSSCG00000008332	81	95	4.47826	5.69986	0.997759	0.217041
ENSSSCG00000015997	87	50	7.71389	4.72306	0.665854	-0.707726			ENSSSCG00000023978	67	95	4.4821	6.52855	0.990572	0.487376
ENSSSCG00000000523	49	53	3.72981	4.72621	0.987859	0.341582			ENSSSCG00000009495	45	54	4.4844	5.72011	0.998013	0.24768
ENSSSCG00000002355	13	35	1.70957	4.72747	0.522133	1.46742			ENSSSCG00000010935	69	63	4.48468	4.40658	0.998297	-0.139906
ENSSSCG00000004821	77	90	3.61328	4.73093	0.983085	0.388798			ENSSSCG00000004101	102	91	4.48688	4.14475	0.998021	-0.173591
ENSSSCG00000025445	9	16	2.63374	4.73299	0.982188	0.845664			ENSSSCG00000016031	36	28	4.48898	4.00212	0.997887	-0.362507
ENSSSCG00000016566	65	81	3.65712	4.73375	0.977771	0.372299			ENSSSCG00000028257	27	30	4.49314	4.93583	0.998642	0.136855
ENSSSCG00000001534	158	172	4.45796	4.73449	0.987148	0.0868155			ENSSSCG00000003827	12	11	4.49513	4.16927	0.999021	-0.125921
ENSSSCG00000004859	129	183	3.58242	4.73575	0.866175	0.402682			ENSSSCG00000015789	94	82	4.49539	4.39113	0.997847	-0.205492
ENSSSCG00000016945	58	56	4.17501	4.73936	0.988228	0.182928			ENSSSCG00000012132	22	24	4.49572	4.91578	0.998758	0.110388
ENSSSCG00000016091	130	106	5.34652	4.73939	0.975269	-0.17389			ENSSSCG00000002729	39	50	4.49727	5.77198	0.997539	0.340574
ENSSSCG00000030343	131	109	4.91014	4.73981	0.978403	-0.0509262			ENSSSCG00000006774	54	90	4.49848	7.28733	0.949351	0.716602
ENSSSCG00000022628	64	52	5.33756	4.74028	0.981399	-0.171213			ENSSSCG00000024154	77	79	4.50022	4.55827	0.998481	0.0260346
ENSSSCG00000006840	86	103	3.58072	4.74457	0.980224	0.406045			ENSSSCG00000003918	81	96	4.5037	5.27268	0.997626	0.232001
ENSSSCG00000008211	50	38	6.11878	4.74509	0.978671	-0.36681			ENSSSCG00000008750	44	33	4.50436	3.69072	0.997156	-0.415449
ENSSSCG00000000553	113	103	4.84242	4.74539	0.986315	-0.0291926			ENSSSCG00000023973	92	80	4.50499	3.79966	0.997828	-0.209989
ENSSSCG00000025426	12	14	3.75878	4.75054	0.991978	0.337807			ENSSSCG00000022672	45	76	4.50545	7.41393	0.963342	0.733564
ENSSSCG00000002434	133	132	4.57354	4.75066	0.988485	0.0548415			ENSSSCG00000010110	38	24	4.51557	2.7827	0.994317	-0.653202
ENSSSCG00000007727	258	224	5.90855	4.75618	0.983646	-0.313007			ENSSSCG00000017208	55	41	4.51578	3.23587	0.996398	-0.426031
ENSSSCG00000010571	176	154	5.0991	4.75922	0.983764	-0.0995235			ENSSSCG00000011413	10	9	4.51632	3.9122	0.999083	-0.148044
ENSSSCG00000004645	105	86	5.32079	4.76072	0.977777	-0.160469			ENSSSCG00000030243	58	80	4.51658	6.45549	0.994146	0.447134
ENSSSCG00000028157	40	45	3.72067	4.76136	0.987585	0.355812			ENSSSCG00000027403	43	36	4.51837	4.05505	0.998145	-0.260777
ENSSSCG00000006092	111	59	7.72839	4.76297	0.227247	-0.698299			ENSSSCG00000002490	25	33	4.52013	5.29394	0.997946	0.377557
ENSSSCG00000024827	54	55	4.82151	4.76415	0.988416	-0.0172481			ENSSSCG00000000869	259	224	4.52066	4.35562	0.997287	-0.219248
ENSSSCG00000007249	218	237	4.4955	4.7666	0.988201	0.084479			ENSSSCG00000006901	96	88	4.52139	4.71612	0.998229	-0.134805
ENSSSCG00000007885	16	21	3.49238	4.76991	0.988428	0.44974			ENSSSCG00000027584	42	48	4.52211	4.87565	0.998347	0.178281
ENSSSCG00000008558	260	231	5.42732	4.77405	0.986118	-0.185006			ENSSSCG00000026795	113	103	4.5244	4.19196	0.998166	-0.143084
ENSSSCG00000011649	21	19	4.69655	4.77568	0.990762	0.0240955			ENSSSCG00000026263	28	24	4.5245	3.86009	0.998549	-0.224914
ENSSSCG00000004205	28	39	3.20196	4.77783	0.977943	0.577373			ENSSSCG00000030119	92	79	4.52842	4.14484	0.997689	-0.227924
ENSSSCG00000012676	63	54	6.10521	4.77784	0.98487	-0.353692			ENSSSCG00000024254	174	187	4.52877	4.85597	0.998454	0.0928222
ENSSSCG00000011452	38	41	4.34604	4.78021	0.988631	0.137383			ENSSSCG00000009542	34	33	4.53133	4.59177	0.998656	-0.0522563
ENSSSCG00000009988	91	84	5.02159	4.78088	0.986868	-0.0708649			ENSSSCG00000005361	52	86	4.53529	7.46703	0.959246	0.705213
ENSSSCG00000025209	10	2	16.2678	4.78108	0.935772	-1.7666			ENSSSCG00000008055	56	71	4.5401	5.41655	0.997046	0.326884
ENSSSCG00000011312	130	130	4.70864	4.78125	0.988461	0.0221048			ENSSSCG00000014288	68	54	4.54173	3.84317	0.996985	-0.337992
ENSSSCG00000004787	105	45	11.3126	4.78355	0.0106565	-1.24176			ENSSSCG00000001510	96	74	4.54189	3.28023	0.995096	-0.381905
ENSSSCG00000006562	57	60	4.36968	4.78653	0.988002	0.131437			ENSSSCG00000012489	35	30	4.54368	6.19748	0.998405	-0.226493
ENSSSCG00000007615	44	47	4.72542	4.78817	0.988363	0.019047			ENSSSCG00000028841	22	30	4.54573	5.89488	0.997879	0.42141
ENSSSCG00000002551	26	51	2.55055	4.79203	0.751073	0.909791			ENSSSCG00000016732	94	96	4.54588	4.40134	0.998482	0.019534
ENSSSCG00000002016	87	80	5.21831	4.79271	0.986789	-0.122741			ENSSSCG00000023241	25	26	4.54686	5.12646	0.998754	0.0443101
ENSSSCG00000014135	50	36	5.66192	4.79366	0.972504	-0.240147			ENSSSCG00000013282	73	89	4.54717	5.43224	0.997307	0.272099
ENSSSCG00000011672	40	46	3.66099	4.79443	0.986921	0.389113			ENSSSCG00000029309	38	26	4.54762	3.23019	0.996244	-0.54191
ENSSSCG00000004610	49	49	4.01753	4.79548	0.988654	0.255383			ENSSSCG00000030820	129	106	4.55077	3.94345	0.996422	-0.291617
ENSSSCG00000013382	236	273	4.2625	4.7961	0.983269	0.170162			ENSSSCG00000012655	208	257	4.55271	5.54564	0.995044	0.293348
ENSSSCG00000007939	213	274	3.93563	4.80058	0.949136	0.286631			ENSSSCG00000014044	246	274	4.55313	5.48307	0.998292	0.14435
ENSSSCG00000017330	273	222	6.25951	4.80146	0.970152	-0.382562			ENSSSCG00000030472	34	39	4.55405	5.00443	0.998446	0.182597
ENSSSCG00000006685	24	20	5.89908	4.80172	0.98929	-0.29695			ENSSSCG00000015485	135	95	4.55801	3.74425	0.97922	-0.513344
ENSSSCG00000002660	40	45	4.46504	4.80258	0.987585	0.105155			ENSSSCG00000011681	46	49	4.56112	5.54363	0.998523	0.0789447
ENSSSCG00000001941	10	12	3.56264	4.80305	0.99242	0.431035			ENSSSCG00000020893	104	105	4.56118	4.51774	0.998493	0.00313053
ENSSSCG00000029217	57	64	4.13498	4.80337	0.986383	0.216169			ENSSSCG00000005597	116	117	4.56132	4.77863	0.998507	0.00172265
ENSSSCG00000008444	126	148	3.86793	4.80353	0.980924	0.312535			ENSSSCG00000021567	24	43	4.56245	8.53142	0.985942	0.806849
ENSSSCG00000011425	119	116	4.85105	4.80629	0.988152	-0.0133852			ENSSSCG00000004205	43	28	4.5638	3.20663	0.994194	-0.612906
ENSSSCG00000012125	109	122	4.03032	4.8088	0.985282	0.25479			ENSSSCG00000024060	47	36	4.5647	3.38244	0.997267	-0.386494
ENSSSCG00000007386	28	24	5.61565	4.81478	0.988973	-0.22199			ENSSSCG00000025498	9	6	4.56608	2.98881	0.99891	-0.528013
ENSSSCG00000004835	77	84	4.45874	4.81705	0.986731	0.111542			ENSSSCG00000006768	34	32	4.56886	4.53933	0.998629	-0.0954035
ENSSSCG00000025180	74	51	6.46666	4.82245	0.944279	-0.423248			ENSSSCG00000003710	130	177	4.57005	6.65844	0.985953	0.431917
ENSSSCG00000028444	196	106	7.67739	4.82274	0.0365435	-0.670777			ENSSSCG00000015393	177	182	4.57128	5.40007	0.998609	0.0293886
ENSSSCG00000006168	57	49	5.25735	4.82321	0.985498	-0.124359			ENSSSCG00000027119	46	36	4.57403	3.82508	0.99755	-0.356077
ENSSSCG00000010239	122	92	5.51772	4.82555	0.955376	-0.193359			ENSSSCG00000024837	176	229	4.5746	5.60241	0.990438	0.367408
ENSSSCG00000003802	32	16	8.90269	4.82697	0.907787	-0.883116			ENSSSCG00000026907	13	28	4.57481	9.5589	0.98568	1.04395
ENSSSCG00000028572	168	137	6.05933	4.82888	0.973279	-0.327457			ENSSSCG00000003805	90	96	4.57668	5.1514	0.998396	0.0816403
ENSSSCG00000009401	99	102	4.12435	4.82916	0.987945	0.2276			ENSSSCG00000030432	68	58	4.5768	3.87462	0.997871	-0.2366
ENSSSCG00000020872	19	17	5.45823	4.82983	0.991065	-0.176462			ENSSSCG00000008941	31	24	4.57838	3.55012	0.998062	-0.36725
ENSSSCG00000009670	46	75	2.62714	4.82989	0.854614	0.878522			ENSSSCG00000016330	106	149	4.57858	6.44919	0.982901	0.477033
ENSSSCG00000013040	44	44	5.16113	4.83282	0.988885	-0.0948193			ENSSSCG00000010974	72	105	4.57895	6.20873	0.985044	0.52796
ENSSSCG00000005423	211	161	6.14944	4.83375	0.94295	-0.347288			ENSSSCG00000009959	184	189	4.58096	4.70633	0.998626	0.0278933
ENSSSCG00000002352	179	139	5.60833	4.83543	0.956861	-0.213928			ENSSSCG00000027031	39	34	4.58352	4.43168	0.998394	-0.203357
ENSSSCG00000010897	29	28	4.78542	4.83901	0.98998	0.0160694			ENSSSCG00000009151	52	74	4.58507	6.55361	0.993186	0.490926
ENSSSCG00000006155	196	192	5.08351	4.84038	0.989456	-0.0706959			ENSSSCG00000025326	127	124	4.5882	4.95107	0.998487	-0.0448016
ENSSSCG00000023850	28	28	4.04792	4.84081	0.990108	0.258072			ENSSSCG00000014084	91	71	4.58856	3.97375	0.995754	-0.364441
ENSSSCG00000022394	55	69	3.70752	4.84409	0.978887	0.385782			ENSSSCG00000028599	27	37	4.59144	6.79386	0.997437	0.43111
ENSSSCG00000007643	67	89	3.57936	4.84433	0.964751	0.43657			ENSSSCG00000015341	64	55	4.59184	4.04564	0.997981	-0.225724
ENSSSCG00000022013	11	10	4.96379	4.84549	0.993002	-0.0347994			ENSSSCG00000011760	43	46	4.59262	5.62574	0.998536	0.0848644
ENSSSCG00000006762	129	129	4.62961	4.84613	0.988446	0.0659366			ENSSSCG00000009308	90	107	4.59492	5.35158	0.99749	0.236707
ENSSSCG00000026729	87	112	3.5751	4.84858	0.967047	0.439585			ENSSSCG00000007818	87	92	4.59507	4.64243	0.998423	0.069247
ENSSSCG00000007637	56	78	3.55434	4.84878	0.956168	0.448062			ENSSSCG00000021154	11	7	4.59604	2.95634	0.998659	-0.598461
ENSSSCG00000013264	13	13	4.79925	4.8494	0.99251	0.0149823			ENSSSCG00000026351	41	32	4.59643	3.57038	0.997716	-0.358905
ENSSSCG00000014163	65	65	4.04943	4.8502	0.98821	0.260336			ENSSSCG00000029413	111	133	4.59749	5.57133	0.997149	0.248305
ENSSSCG00000017937	77	78	4.80066	4.85644	0.98805	0.0166425			ENSSSCG00000021439	171	148	4.60014	4.6674	0.997411	-0.217764
ENSSSCG00000024254	196	193	5.01404	4.86002	0.989512	-0.0450057			ENSSSCG00000026503	71	95	4.60265	6.35557	0.994482	0.404834
ENSSSCG00000027064	36	44	3.72079	4.86172	0.984948	0.385848			ENSSSCG00000027150	80	100	4.60402	5.79903	0.996628	0.308052
ENSSSCG00000006115	182	83	10.4114	4.86331	0.000930965	-1.09816			ENSSSCG00000006039	176	159	4.60476	4.58854	0.998069	-0.156321
ENSSSCG00000020879	89	81	4.98888	4.86433	0.986414	-0.0364895			ENSSSCG00000026731	132	109	4.60563	4.00454	0.996524	-0.284633
ENSSSCG00000025691	55	49	5.42012	4.8648	0.986899	-0.155939			ENSSSCG00000001049	392	398	4.6072	4.67344	0.999051	0.0112409
ENSSSCG00000023917	11	13	3.78662	4.8657	0.992193	0.361744			ENSSSCG00000015771	61	47	4.60772	3.94299	0.996715	-0.380134
ENSSSCG00000002648	88	191	2.45232	4.86757	0.000871326	0.989075			ENSSSCG00000007618	90	80	4.60824	4.2298	0.998039	-0.178602
ENSSSCG00000006197	262	117	10.4103	4.86851	3.74681e-05	-1.09646			ENSSSCG00000026959	119	112	4.60854	4.92954	0.998354	-0.0973212
ENSSSCG00000008491	69	39	7.90839	4.87334	0.762141	-0.698487			ENSSSCG00000014015	45	33	4.60874	3.3338	0.996774	-0.447205
ENSSSCG00000001508	100	121	4.3331	4.87416	0.977933	0.169766			ENSSSCG00000011018	89	100	4.60877	5.65769	0.998126	0.155928
ENSSSCG00000025130	19	13	6.85764	4.88035	0.986588	-0.490704			ENSSSCG00000013913	66	89	4.61044	5.97656	0.994503	0.415601
ENSSSCG00000015951	51	44	5.40028	4.88212	0.986181	-0.145538			ENSSSCG00000007700	248	316	4.61063	5.89991	0.991357	0.337806
ENSSSCG00000026101	33	26	5.84529	4.88306	0.985731	-0.25948			ENSSSCG00000022641	15	20	4.61065	5.76575	0.99849	0.383608
ENSSSCG00000029811	107	97	5.0631	4.88602	0.986091	-0.0513671			ENSSSCG00000009330	21	24	4.61137	5.3953	0.998705	0.174712
ENSSSCG00000010462	7	12	2.54246	4.89175	0.988117	0.944118			ENSSSCG00000026346	24	23	4.61329	4.32982	0.998774	-0.0692883
ENSSSCG00000024470	123	77	7.47223	4.89466	0.70834	-0.610313			ENSSSCG00000008586	39	46	4.615	5.58739	0.998238	0.222591
ENSSSCG00000024722	37	28	5.60507	4.90012	0.982625	-0.193929			ENSSSCG00000006959	40	38	4.61523	4.3027	0.998582	-0.0826638
ENSSSCG00000024777	294	361	4.21021	4.90047	0.970661	0.21904			ENSSSCG00000011336	114	125	4.61532	5.42041	0.998263	0.121296
ENSSSCG00000022457	259	213	6.10165	4.90197	0.973557	-0.315841			ENSSSCG00000022402	67	42	4.61636	3.06778	0.982127	-0.672451
ENSSSCG00000000014	116	76	7.82201	4.9028	0.832736	-0.673932			ENSSSCG00000029843	73	87	4.61642	4.78409	0.997643	0.239655
ENSSSCG00000026872	30	26	5.71908	4.90365	0.988832	-0.221917			ENSSSCG00000002451	170	178	4.61942	4.46301	0.998555	0.0553973
ENSSSCG00000006519	123	116	5.30446	4.90601	0.987559	-0.11267			ENSSSCG00000029237	33	37	4.61966	4.84854	0.998531	0.150384
ENSSSCG00000002436	109	119	4.48703	4.91215	0.986529	0.130618			ENSSSCG00000002352	157	166	4.62529	5.40112	0.998497	0.0693694
ENSSSCG00000030820	112	129	4.05874	4.91307	0.983179	0.275616			ENSSSCG00000009449	80	53	4.62621	3.48917	0.984679	-0.59603
ENSSSCG00000016117	106	110	4.09363	4.91387	0.987903	0.263498			ENSSSCG00000022610	174	182	4.62625	5.41703	0.998566	0.0539204
ENSSSCG00000004434	64	103	2.75345	4.91472	0.768538	0.835837			ENSSSCG00000017014	27	39	4.63306	7.32748	0.996619	0.505226
ENSSSCG00000010319	113	116	4.12788	4.91536	0.98811	0.251901			ENSSSCG00000012745	33	29	4.63427	3.97678	0.998515	-0.191271
ENSSSCG00000016920	122	91	5.53266	4.91617	0.9508	-0.17044			ENSSSCG00000001537	65	65	4.63514	4.51995	0.998506	-0.0104962
ENSSSCG00000011368	77	81	4.87852	4.92241	0.98764	0.0129243			ENSSSCG00000011664	27	15	4.63556	2.55367	0.994031	-0.820007
ENSSSCG00000000784	293	251	4.9783	4.92265	0.982198	-0.0162034			ENSSSCG00000014060	106	139	4.63586	6.5069	0.993332	0.377456
ENSSSCG00000008816	119	92	5.68453	4.92514	0.964469	-0.20688			ENSSSCG00000015617	34	60	4.63662	7.3784	0.970575	0.792164
ENSSSCG00000012130	23	35	1.86126	4.93096	0.97143	1.40557			ENSSSCG00000011576	115	122	4.63807	5.22578	0.998422	0.0740153
ENSSSCG00000028877	50	18	12.6785	4.93781	0.113987	-1.36044			ENSSSCG00000024187	107	101	4.64052	5.1921	0.998364	-0.093065
ENSSSCG00000009815	154	220	3.53015	4.93825	0.822418	0.484265			ENSSSCG00000005227	122	107	4.64265	4.53564	0.997773	-0.198293
ENSSSCG00000010251	127	126	4.39001	4.94096	0.988397	0.170582			ENSSSCG00000024527	147	158	4.64265	5.17393	0.998407	0.0928908
ENSSSCG00000011641	14	19	3.96884	4.94589	0.988483	0.31753			ENSSSCG00000014965	112	108	4.64339	4.65039	0.99844	-0.0625822
ENSSSCG00000023179	13	24	2.66153	4.94971	0.963581	0.895102			ENSSSCG00000010196	97	61	4.6449	3.38422	0.957062	-0.67158
ENSSSCG00000016638	101	55	9.144	4.9549	0.377232	-0.883969			ENSSSCG00000013984	150	129	4.64497	4.36348	0.997354	-0.226712
ENSSSCG00000003226	12	14	1.00009	4.96353	0.991978	2.31121			ENSSSCG00000026046	19	24	4.64581	5.99859	0.998488	0.312662
ENSSSCG00000009584	163	177	5.5023	4.96405	0.987338	-0.148503			ENSSSCG00000007386	23	20	4.64737	4.01184	0.99869	-0.203401
ENSSSCG00000016843	193	187	4.60714	4.96487	0.989238	0.107906			ENSSSCG00000001692	29	23	4.64824	3.5403	0.99826	-0.332977
ENSSSCG00000004938	147	125	5.0669	4.97001	0.980797	-0.0278575			ENSSSCG00000009401	122	103	4.65262	4.46671	0.997165	-0.252772
ENSSSCG00000023894	451	390	6.1145	4.97121	0.985754	-0.29864			ENSSSCG00000008389	83	81	4.65774	5.16749	0.998462	-0.0453195
ENSSSCG00000023992	36	47	3.31949	4.97703	0.980264	0.58431			ENSSSCG00000002904	168	167	4.65795	4.7204	0.998593	-0.0191534
ENSSSCG00000003988	88	70	5.6579	4.98233	0.975597	-0.183455			ENSSSCG00000007953	43	41	4.66065	4.3827	0.998562	-0.07763
ENSSSCG00000008583	197	190	4.70398	4.98287	0.98922	0.0830976			ENSSSCG00000030107	12	12	4.66121	4.65019	0.999029	-0.00987715
ENSSSCG00000026353	18	16	4.79672	4.98303	0.991229	0.0549724			ENSSSCG00000011340	120	117	4.66195	4.96349	0.998475	-0.0468035
ENSSSCG00000016665	127	89	6.6728	4.98328	0.90574	-0.421191			ENSSSCG00000024687	175	169	4.66343	4.1754	0.998539	-0.0606489
ENSSSCG00000005669	150	193	4.13299	4.98877	0.955647	0.271503			ENSSSCG00000012330	41	30	4.66411	3.66525	0.99702	-0.449275
ENSSSCG00000000770	212	331	3.32672	4.99253	0.294967	0.585671			ENSSSCG00000028860	22	23	4.6644	5.46324	0.998797	0.0513473
ENSSSCG00000008545	156	113	6.52427	4.99378	0.917495	-0.385685			ENSSSCG00000003198	76	83	4.66446	5.00686	0.998326	0.115108
ENSSSCG00000009926	98	120	3.80478	4.99417	0.976216	0.392433			ENSSSCG00000030265	30	30	4.66506	4.87636	0.998705	-0.0103252
ENSSSCG00000013428	10	17	3.25526	4.99616	0.982828	0.618041			ENSSSCG00000007466	10	11	4.66522	5.39323	0.999057	0.116464
ENSSSCG00000012525	28	27	4.86017	4.99682	0.990086	0.0399888			ENSSSCG00000012110	104	104	4.66677	4.07344	0.998491	-0.0105523
ENSSSCG00000006968	193	124	7.34283	4.9989	0.571937	-0.55472			ENSSSCG00000015266	36	37	4.66845	5.32083	0.998638	0.0281592
ENSSSCG00000008332	61	80	3.58276	5.01115	0.970219	0.484069			ENSSSCG00000002660	40	43	4.67033	4.82636	0.998551	0.0916221
ENSSSCG00000020678	22	33	3.5277	5.01503	0.974904	0.507522			ENSSSCG00000004209	186	154	4.67362	4.2657	0.996026	-0.281461
ENSSSCG00000016885	58	59	6.47685	5.0189	0.988307	-0.367932			ENSSSCG00000011452	41	28	4.67428	3.2246	0.995834	-0.545686
ENSSSCG00000023522	96	195	2.56803	5.01943	0.00410962	0.96687			ENSSSCG00000004738	270	245	4.67495	4.18193	0.998236	-0.150278
ENSSSCG00000013740	27	31	4.11294	5.0196	0.988765	0.287416			ENSSSCG00000029285	36	34	4.675	4.94357	0.998611	-0.0906839
ENSSSCG00000000442	74	41	9.51521	5.0199	0.679459	-0.922575			ENSSSCG00000024650	11	4	4.6816	1.87539	0.996039	-1.28319
ENSSSCG00000024214	19	27	3.464	5.02113	0.983031	0.535565			ENSSSCG00000011067	31	32	4.68313	4.96101	0.998684	0.0341422
ENSSSCG00000027976	13	15	4.3281	5.02237	0.991775	0.214643			ENSSSCG00000002633	238	274	4.68387	5.12069	0.997755	0.191864
ENSSSCG00000008096	128	95	6.0244	5.02596	0.946345	-0.261407			ENSSSCG00000011495	120	168	4.68689	6.43051	0.98046	0.471658
ENSSSCG00000010757	262	176	7.44175	5.02848	0.636213	-0.565524			ENSSSCG00000010634	17	16	4.68774	4.34717	0.998898	-0.0928423
ENSSSCG00000021371	58	52	5.00836	5.03125	0.986902	0.00658143			ENSSSCG00000029129	98	108	4.69233	5.66	0.99824	0.128363
ENSSSCG00000027115	185	160	5.29512	5.03169	0.982582	-0.073612			ENSSSCG00000001429	201	327	4.70201	7.00549	0.222082	0.68891
ENSSSCG00000009425	205	124	7.48591	5.03333	0.267385	-0.572671			ENSSSCG00000010564	92	96	4.70621	4.74675	0.998453	0.050253
ENSSSCG00000026331	52	77	3.55734	5.03408	0.931291	0.500951			ENSSSCG00000008360	87	103	4.71229	5.29283	0.997582	0.230628
ENSSSCG00000004209	174	173	4.61651	5.03631	0.989184	0.125565			ENSSSCG00000012944	85	116	4.722	6.08355	0.991623	0.43384
ENSSSCG00000004351	55	47	4.58133	5.03995	0.985428	0.137667			ENSSSCG00000013079	242	298	4.72247	5.30941	0.995024	0.288651
ENSSSCG00000014316	52	87	3.03829	5.04553	0.759183	0.731733			ENSSSCG00000021140	43	54	4.72357	6.08262	0.997633	0.311908
ENSSSCG00000008831	140	100	6.36332	5.0467	0.913895	-0.334435			ENSSSCG00000017128	55	70	4.72382	5.63047	0.99701	0.332255
ENSSSCG00000008230	96	63	8.45135	5.04859	0.87774	-0.743307			ENSSSCG00000009055	24	18	4.73001	3.95887	0.99823	-0.40729
ENSSSCG00000008537	95	94	4.73653	5.04886	0.988061	0.0921477			ENSSSCG00000004806	100	88	4.7315	4.88228	0.997902	-0.193144
ENSSSCG00000012179	111	100	5.21104	5.05113	0.985777	-0.0449627			ENSSSCG00000013351	181	162	4.73672	4.2102	0.997957	-0.169715
ENSSSCG00000028083	162	126	6.29335	5.05384	0.959668	-0.316471			ENSSSCG00000003676	17	29	4.73856	8.63082	0.995121	0.728832
ENSSSCG00000011867	25	66	1.89713	5.05652	0.0373299	1.41434			ENSSSCG00000014562	114	95	4.73994	3.73834	0.996979	-0.271239
ENSSSCG00000005484	167	165	5.28053	5.06236	0.989023	-0.060853			ENSSSCG00000015498	138	138	4.74753	5.01511	0.998539	-0.0105755
ENSSSCG00000022797	205	144	6.74294	5.06252	0.842241	-0.413519			ENSSSCG00000021789	53	82	4.74791	6.76737	0.982473	0.610259
ENSSSCG00000001956	36	37	4.67735	5.06324	0.98929	0.114343			ENSSSCG00000024622	94	57	4.74801	3.2995	0.938116	-0.723008
ENSSSCG00000006099	136	94	6.64687	5.06487	0.881174	-0.392148			ENSSSCG00000004065	148	151	4.74834	5.01846	0.998556	0.0181903
ENSSSCG00000001692	39	34	5.97237	5.06907	0.987742	-0.236581			ENSSSCG00000021457	159	145	4.74973	4.88338	0.998158	-0.142741
ENSSSCG00000008624	283	239	6.04853	5.06962	0.979645	-0.254705			ENSSSCG00000004711	69	49	4.75251	3.33885	0.993528	-0.496434
ENSSSCG00000021646	229	138	8.13771	5.07116	0.198329	-0.682294			ENSSSCG00000010692	120	132	4.75564	5.61158	0.998243	0.12592
ENSSSCG00000009963	100	79	6.69511	5.07197	0.972671	-0.400551			ENSSSCG00000017823	47	47	4.75731	4.41497	0.998571	-0.0104394
ENSSSCG00000004247	115	96	5.24908	5.07661	0.979554	-0.0482075			ENSSSCG00000021270	56	56	4.75909	5.71707	0.998532	-0.0104723
ENSSSCG00000015954	107	119	5.07784	5.07731	0.985648	-0.000142066			ENSSSCG00000012887	181	150	4.75922	4.24528	0.996109	-0.280082
ENSSSCG00000004648	27	13	9.34896	5.08145	0.92479	-0.879558			ENSSSCG00000003814	59	44	4.76253	4.06771	0.996149	-0.426007
ENSSSCG00000017741	45	29	7.05546	5.08408	0.95614	-0.472756			ENSSSCG00000007270	12	10	4.76483	3.90605	0.998969	-0.252121
ENSSSCG00000003998	87	122	3.89277	5.08499	0.924593	0.38544			ENSSSCG00000017214	76	82	4.76752	4.99803	0.998373	0.0978177
ENSSSCG00000002528	144	134	5.73875	5.08542	0.987352	-0.174388			ENSSSCG00000016563	77	60	4.76836	4.21002	0.996276	-0.365499
ENSSSCG00000011206	6	18	1.64935	5.08741	0.89082	1.62499			ENSSSCG00000008558	226	246	4.76864	5.19388	0.998474	0.111247
ENSSSCG00000026258	101	68	6.66962	5.08808	0.896333	-0.390473			ENSSSCG00000003928	107	126	4.7711	5.34648	0.997511	0.223364
ENSSSCG00000006101	50	55	4.01702	5.08979	0.987418	0.341491			ENSSSCG00000027697	14	9	4.77771	3.05115	0.998384	-0.597888
ENSSSCG00000022634	81	72	4.95087	5.09106	0.985635	0.0402866			ENSSSCG00000025130	13	17	4.77936	6.27323	0.998675	0.354038
ENSSSCG00000004901	79	61	5.72259	5.09446	0.972697	-0.16773			ENSSSCG00000027007	90	99	4.78115	5.93704	0.998262	0.125611
ENSSSCG00000029924	116	191	3.21867	5.1021	0.324765	0.664613			ENSSSCG00000000665	43	41	4.78164	4.92117	0.998562	-0.07763
ENSSSCG00000028486	16	14	5.124	5.10287	0.991583	-0.00595311			ENSSSCG00000007551	23	24	4.78483	4.48601	0.998782	0.0488095
ENSSSCG00000017497	243	222	5.79919	5.10408	0.987914	-0.184197			ENSSSCG00000009683	338	435	4.78534	6.21501	0.987691	0.352483
ENSSSCG00000024816	99	93	6.04828	5.11032	0.98733	-0.243122			ENSSSCG00000022634	87	72	4.78625	4.57635	0.997234	-0.280346
ENSSSCG00000002145	80	83	4.57725	5.11085	0.987831	0.159081			ENSSSCG00000007622	253	252	4.78631	4.78489	0.998781	-0.0163005
ENSSSCG00000006703	29	38	4.17894	5.11141	0.982786	0.290595			ENSSSCG00000010302	176	177	4.78791	5.04349	0.998619	-0.00246027
[truncated: 8,973 more rows]

## Sheet: Table S2
ID_TPM<2	S1	S2	PValue	FDR	log2FC	regulated		ID_TPM>2	S3	S4	PValue	FDR	log2FC
unconservative_2_152302	1.9113	2.1063	0.087439	0.129498	-0.140157	down		ssc-let-7a	40045.6	44885.4	0	0	-0.1646
unconservative_17_143538	2.1024	1.9443	0.087601	0.129329	0.112786	up		ssc-let-7c	4942.72	6298.71	0	0	-0.34975
unconservative_5_227325	2.1024	1.9443	0.087601	0.129329	0.112786	up		ssc-let-7d-3p	611.124	445.529	0	0	0.45594
unconservative_6_251863	2.1024	1.7823	0.08445	0.128181	0.238297	up		ssc-let-7d-5p	4156.44	5011.51	0	0	-0.2699
unconservative_12_58662	2.2936	2.1063	0.08366	0.127534	0.122903	up		ssc-let-7e	3347.87	4585.57	0	0	-0.45386
ssc-miR-7139-3p	2.2936	2.4304	0.081915	0.125555	-0.08358	down		ssc-let-7f	14256.3	12492.9	0	0	0.19049
unconservative_13_73492	1.9113	2.2683	0.081125	0.124617	-0.247057	down		ssc-let-7g	5221.98	5592.85	0	0	-0.09899
unconservative_14_110816	2.2936	1.9443	0.080382	0.123746	0.238363	up		ssc-let-7i	25933.3	27551.1	0	0	-0.0873
unconservative_16_129569	2.1024	1.6202	0.07802	0.121441	0.375865	up		ssc-miR-1	205.793	196.263	0.00404	0.01811	0.06841
unconservative_3_184156	2.4847	2.1063	0.076765	0.12002	0.238361	up		ssc-miR-100	189970	201710	0	0	-0.08651
unconservative_3_178177	2.6758	2.4304	0.076927	0.120006	0.138777	up		ssc-miR-101	1633.99	1457.28	0	0	0.16512
unconservative_6_257120	2.8669	2.7544	0.075404	0.118685	0.0577535	up		ssc-miR-103	1487.71	1359.58	0	0	0.12993
unconservative_2_164694	2.6758	2.9164	0.074125	0.117462	-0.124218	down		ssc-miR-106a	3.8496	6.386	0.00835	0.02896	-0.7302
ssc-miR-339-3p	2.2936	1.7823	0.074262	0.117282	0.363874	up		ssc-miR-107	79.2376	84.5079	0.00733	0.02647	-0.0929
unconservative_18_149123	1.9113	2.4304	0.073176	0.116749	-0.34664	down		ssc-miR-10a-3p	8.9824	8.5147	0.03423	0.07029	0.07715
unconservative_2_166720	3.0581	2.9164	0.072942	0.116641	0.068447	up		ssc-miR-10a-5p	5447.98	5216.5	0	0	0.06264
unconservative_13_74147	2.2936	2.7544	0.071627	0.115458	-0.264124	down		ssc-miR-10b	29538	28082.6	0	0	0.07289
unconservative_14_106025	3.0581	3.2405	0.070842	0.114985	-0.0835809	down		ssc-miR-122	89.3428	102.389	0.00098	0.00578	-0.19663
unconservative_4_207543	2.6758	3.0785	0.069676	0.113486	-0.202257	down		ssc-miR-1249	26.1452	30.8656	0.00683	0.02574	-0.23945
ssc-miR-30c-1-3p	2.8669	3.2405	0.068627	0.113356	-0.176725	down		ssc-miR-125a	5440.28	6648.88	0	0	-0.28943
ssc-miR-9820-5p	2.2936	2.9164	0.064608	0.110085	-0.346575	down		ssc-miR-125b	17848.7	19668.8	0	0	-0.1401
ssc-miR-95	2.8669	2.2683	0.065213	0.110047	0.33788	up		ssc-miR-126-3p	87.2576	110.052	9e-06	7.35e-05	-0.33483
ssc-miR-190a	2.2936	1.6202	0.065624	0.109948	0.501442	up		ssc-miR-126-5p	0.9624	2.1287	0.02542	0.05945	-1.14526
unconservative_6_241318	3.6315	3.8886	0.064291	0.109811	-0.0986853	down		ssc-miR-127	859.102	845.505	0.00269	0.01296	0.02302
unconservative_17_135489	1.529	2.2683	0.062838	0.108251	-0.569023	down		ssc-miR-128	1664.47	1382.99	0	0	0.26727
unconservative_10_38083	1.3379	2.1063	0.061351	0.106473	-0.654741	down		ssc-miR-1296-5p	48.6012	55.5581	0.00415	0.01846	-0.19301
unconservative_4_206111	1.3379	2.1063	0.061351	0.106473	-0.654741	down		ssc-miR-129a-3p	58.546	47.0434	0.00051	0.00322	0.31558
unconservative_4_207877	4.5871	4.3747	0.05942	0.103893	0.0683983	up		ssc-miR-129a-5p	1060.4	1014.52	0.00022	0.00146	0.06382
ssc-miR-374b-3p	2.8669	2.1063	0.05817	0.10286	0.444781	up		ssc-miR-129b	1060.24	1014.52	0.00022	0.00147	0.0636
unconservative_2_158711	5.1605	4.8607	0.055593	0.100843	0.0863468	up		ssc-miR-1306-3p	29.5136	46.192	1e-06	8.85e-06	-0.64626
unconservative_12_62300	2.2936	1.4582	0.055116	0.100628	0.653425	up		ssc-miR-1306-5p	42.6664	43.8505	0.01523	0.04288	-0.03949
ssc-miR-96-5p	4.7782	4.3747	0.056704	0.100521	0.127283	up		ssc-miR-1307	3186.18	3615.32	0	0	-0.18229
ssc-miR-2411	5.1605	5.1848	0.056171	0.100081	-0.00677748	down		ssc-miR-130a	8.02	8.5147	0.03485	0.07094	-0.08635
ssc-miR-130b	5.1605	5.0228	0.056292	0.100043	0.039019	up		ssc-miR-130b	4.3308	4.4702	0.04932	0.08445	-0.04571
unconservative_7_266173	4.7782	4.2126	0.054402	0.0997133	0.181756	up		ssc-miR-132	22.9372	35.7615	9e-06	7.35e-05	-0.64072
ssc-miR-450c-3p	5.1605	4.6987	0.054063	0.0993514	0.135249	up		ssc-miR-133a-3p	220.229	254.162	1e-05	8.02e-05	-0.20674
ssc-miR-497	1.529	2.4304	0.052146	0.0973577	-0.668605	down		ssc-miR-133a-5p	2.406	1.0643	0.02142	0.05395	1.17673
unconservative_10_41908	4.5871	5.1848	0.052334	0.0964264	-0.176706	down		ssc-miR-133b	2.7268	5.5345	0.00375	0.01702	-1.02124
unconservative_5_228420	5.925	6.1569	0.051411	0.0962414	-0.055389	down		ssc-miR-1343	324.97	360.808	4e-05	0.00028	-0.15093
ssc-miR-1285	4.7782	4.0506	0.051245	0.0961871	0.238332	up		ssc-miR-136	2.406	3.8316	0.02442	0.0585	-0.67131
ssc-miR-133a-5p	2.4847	3.4025	0.050414	0.0950084	-0.453523	down		ssc-miR-139-3p	6.7368	2.9801	0.00104	0.00599	1.1767
unconservative_2_167302	2.4847	3.4025	0.050414	0.0950084	-0.453523	down		ssc-miR-139-5p	13.4736	12.1334	0.02434	0.05852	0.15115
ssc-miR-34c	4.396	3.5645	0.050014	0.0946357	0.302492	up		ssc-miR-140-3p	863.754	835.287	0.001	0.00587	0.04835
ssc-miR-769-3p	3.8226	2.9164	0.049237	0.0934172	0.390366	up		ssc-miR-140-5p	55.4984	66.6271	0.00087	0.00527	-0.26366
unconservative_7_272572	4.0137	4.8607	0.048625	0.0925061	-0.276231	down		ssc-miR-143-3p	46014.6	43269.3	0	0	0.08875
unconservative_2_161081	7.0718	6.805	0.047827	0.0919851	0.0554823	up		ssc-miR-143-5p	99.7688	107.71	0.00454	0.01969	-0.1105
unconservative_6_238165	2.1024	3.0785	0.048135	0.0919477	-0.55019	down		ssc-miR-145-3p	244.129	238.836	0.00578	0.02277	0.03162
unconservative_3_178013	3.2492	4.2126	0.047071	0.0912813	-0.374626	down		ssc-miR-145-5p	449.12	1172.68	0	0	-1.38464
ssc-miR-331-3p	5.925	5.1848	0.047115	0.091115	0.192527	up		ssc-miR-1468	2.7268	1.4901	0.02872	0.06301	0.8718
ssc-miR-184	1.1468	2.1063	0.046803	0.091013	-0.877097	down		ssc-miR-146a-5p	128.801	233.301	0	0	-0.85705
ssc-miR-130a	6.4984	6.9671	0.047159	0.0909495	-0.100474	down		ssc-miR-146b	281.021	368.259	0	0	-0.39004
ssc-miR-7139-5p	4.396	5.3468	0.044898	0.089796	-0.282484	down		ssc-miR-148a-3p	12076.3	15478.1	0	0	-0.35805
unconservative_3_180323	2.6758	3.7266	0.044585	0.0894248	-0.47789	down		ssc-miR-148a-5p	362.183	362.724	0.0055	0.02204	-0.00215
ssc-miR-30b-3p	2.4847	3.5645	0.043407	0.0888388	-0.520628	down		ssc-miR-148b-3p	366.835	387.63	0.00116	0.00649	-0.07955
unconservative_17_139175	2.4847	3.5645	0.043407	0.0888388	-0.520628	down		ssc-miR-148b-5p	11.5488	11.9205	0.03001	0.0647	-0.0457
unconservative_6_256084	2.2936	1.2962	0.043645	0.0886796	0.823325	up		ssc-miR-149	49.8844	47.0434	0.01206	0.03667	0.0846
unconservative_7_271628	5.5428	4.5367	0.042804	0.0886384	0.288972	up		ssc-miR-151-3p	2223.3	2253.4	0.00129	0.00688	-0.0194
ssc-miR-335	5.925	6.805	0.042891	0.0885573	-0.19978	down		ssc-miR-151-5p	78.596	89.191	0.00189	0.0095	-0.18244
unconservative_13_69236	8.6008	8.1012	0.042413	0.0880885	0.0863352	up		ssc-miR-152	340.529	408.065	0	0	-0.26102
ssc-miR-493-3p	5.1605	4.0506	0.040749	0.0856461	0.349375	up		ssc-miR-155-5p	329.943	409.98	0	0	-0.31334
unconservative_9_299630	8.2186	8.9113	0.040496	0.0854983	-0.116743	down		ssc-miR-15a	9.7844	11.2819	0.02412	0.0582	-0.20545
unconservative_4_208604	3.0581	1.9443	0.040066	0.0852313	0.653385	up		ssc-miR-15b	19.8896	23.6282	0.00942	0.03111	-0.2485
unconservative_9_299939	7.454	6.481	0.039936	0.085213	0.201798	up		ssc-miR-16	61.4332	87.0623	0	0	-0.50303
unconservative_9_312812	5.7339	6.805	0.0397	0.0849677	-0.247078	down		ssc-miR-17-3p	2.0852	4.2573	0.00766	0.02725	-1.02975
ssc-miR-1839-5p	8.2186	7.2911	0.039227	0.0842121	0.172756	up		ssc-miR-17-5p	86.1348	97.067	0.00189	0.00945	-0.17238
unconservative_15_111959	7.8363	6.805	0.038451	0.083698	0.203577	up		ssc-miR-181a	718.752	826.56	0	0	-0.20162
unconservative_5_229805	2.6758	3.8886	0.038206	0.0835533	-0.539281	down		ssc-miR-181b	254.073	324.834	0	0	-0.35446
unconservative_5_223821	1.9113	3.0785	0.03847	0.0833517	-0.687673	down		ssc-miR-181c	1.604	2.1287	0.06202	0.09906	-0.4083
unconservative_2_165259	10.8944	11.0177	0.038619	0.0832889	-0.0162363	down		ssc-miR-181d-5p	7.5388	8.0889	0.0354	0.07163	-0.10161
ssc-miR-10a-3p	4.7782	5.9949	0.037735	0.0830407	-0.327268	down		ssc-miR-182	52.7716	59.3897	0.00488	0.02017	-0.17045
ssc-miR-9843-3p	11.0855	10.5316	0.037385	0.0825292	0.0739492	up		ssc-miR-183	132.33	112.606	0.00014	0.00097	0.23285
unconservative_7_277288	12.0412	11.8278	0.03686	0.0824068	0.0257974	up		ssc-miR-1839-5p	7.3784	6.386	0.03311	0.06882	0.2084
ssc-miR-17-3p	4.9694	3.7266	0.037047	0.0823006	0.415212	up		ssc-miR-184	8.3408	6.8117	0.02543	0.05927	0.29217
ssc-miR-30a-3p	9.9387	9.0734	0.037099	0.0821561	0.131414	up		ssc-miR-185	682.983	755.25	0	0	-0.1451
unconservative_10_34935	9.5565	8.4253	0.034858	0.0784305	0.181754	up		ssc-miR-186	332.509	382.521	0	0	-0.20214
ssc-miR-139-5p	3.0581	4.3747	0.034961	0.0784109	-0.516549	down		ssc-miR-18a	16.842	18.7322	0.01889	0.04975	-0.15346
unconservative_5_227231	7.454	6.1569	0.034517	0.077913	0.275811	up		ssc-miR-191	5268.5	5673.31	0	0	-0.1068
unconservative_13_89891	3.4403	4.8607	0.032157	0.07282	-0.49863	down		ssc-miR-192	3.6892	4.2573	0.04671	0.0816	-0.20663
unconservative_2_162834	2.1024	0.9721	0.031909	0.0724923	1.11286	up		ssc-miR-193a-3p	1.604	2.3415	0.05088	0.08647	-0.54576
ssc-miR-628	3.2492	4.6987	0.030999	0.0718195	-0.532177	down		ssc-miR-193a-5p	2027.78	2082.26	0.00033	0.00215	-0.03825
ssc-miR-224	5.3516	3.8886	0.030843	0.0716947	0.460719	up		ssc-miR-196a	82.606	103.453	2e-05	0.00016	-0.32466
unconservative_12_62703	6.1161	7.6151	0.031044	0.0713351	-0.316251	down		ssc-miR-196b-5p	44.2704	51.5136	0.00346	0.016	-0.21861
unconservative_15_124856	15.4815	14.7442	0.031297	0.0713328	0.0703977	up		ssc-miR-199a-3p	11555	18393.6	0	0	-0.67068
ssc-miR-493-5p	7.0718	8.5873	0.030459	0.0710373	-0.280127	down		ssc-miR-199a-5p	8172.54	8574.89	0	0	-0.06933
unconservative_4_207517	7.8363	6.319	0.030307	0.0709184	0.310476	up		ssc-miR-199b-3p	11554.6	18392.3	0	0	-0.67064
unconservative_15_111716	3.8226	5.3468	0.029703	0.0699715	-0.484121	down		ssc-miR-199b-5p	3450.2	3995.29	0	0	-0.21162
ssc-miR-382	13.7613	12.4759	0.029556	0.0698596	0.141473	up		ssc-miR-19a	7.0576	7.2375	0.03878	0.07559	-0.03631
ssc-miR-15b	16.0549	17.3366	0.027348	0.0653003	-0.110807	down		ssc-miR-19b	27.268	27.2469	0.02004	0.05141	0.00112
unconservative_2_155715	3.0581	4.6987	0.02497	0.06129	-0.619626	down		ssc-miR-204	6.416	8.9404	0.01225	0.03676	-0.47867
ssc-miR-2483	4.396	6.1569	0.024709	0.0610765	-0.486013	down		ssc-miR-206	460.508	372.516	0	0	0.30592
unconservative_3_182121	8.4097	10.3696	0.023651	0.0596158	-0.302234	down		ssc-miR-20a	395.707	373.793	0.00101	0.00584	0.08219
unconservative_7_264074	8.4097	10.3696	0.023651	0.0596158	-0.302234	down		ssc-miR-20b	4.4912	3.8316	0.04478	0.08046	0.22915
unconservative_5_226985	3.2492	1.7823	0.023975	0.0595768	0.866344	up		ssc-miR-21	282578	253568	0	0	0.15628
unconservative_4_199699	2.2936	3.8886	0.023495	0.0595433	-0.761637	down		ssc-miR-210	14.5964	15.7521	0.02381	0.05784	-0.10993
unconservative_2_169204	0.9556	2.2683	0.023661	0.0593215	-1.24713	down		ssc-miR-212	185.101	203.287	0.00076	0.00469	-0.1352
unconservative_X_318200	2.6758	1.2962	0.023321	0.0593165	1.04568	up		ssc-miR-214	739.604	1459.2	0	0	-0.98035
unconservative_2_153465	5.7339	7.6151	0.023743	0.0593153	-0.409346	down		ssc-miR-217	1.9248	2.3415	0.06343	0.10038	-0.28272
unconservative_1_19508	8.9831	11.0177	0.022755	0.0582993	-0.294538	down		ssc-miR-218-5p	6.0952	8.7275	0.01081	0.0336	-0.51789
ssc-miR-219a	25.0379	23.4935	0.022621	0.0581683	0.0918519	up		ssc-miR-218b	6.0952	8.7275	0.01081	0.0336	-0.51789
unconservative_10_36474	2.4847	1.1342	0.022769	0.058123	1.1314	up		ssc-miR-219a	25.0224	20.4352	0.00645	0.02473	0.29216
unconservative_7_270919	11.6589	9.5594	0.021792	0.0571887	0.28644	up		ssc-miR-221-3p	1583.95	1944.96	0	0	-0.29621
ssc-miR-27b-5p	32.8743	32.0808	0.021881	0.0571021	0.0352501	up		ssc-miR-221-5p	208.039	210.738	0.00691	0.02575	-0.0186
unconservative_9_303679	8.6008	10.6936	0.021911	0.0568633	-0.314205	down		ssc-miR-222	9859.78	7553.99	0	0	0.38432
ssc-miR-7137-3p	5.3516	3.5645	0.021918	0.0565678	0.586271	up		ssc-miR-224	23.4184	22.7767	0.02128	0.05378	0.04008
ssc-miR-671-5p	34.5944	33.8631	0.021429	0.0565532	0.0308245	up		ssc-miR-2320-3p	128.32	111.116	0.00036	0.00227	0.20768
ssc-miR-664-5p	12.8057	15.0683	0.020547	0.0548441	-0.234731	down		ssc-miR-2320-5p	121.102	145.601	2e-05	0.00016	-0.26579
ssc-miR-20b	13.5702	11.3417	0.020599	0.0547746	0.258805	up		ssc-miR-2366	57.9044	55.9838	0.01274	0.03756	0.04866
ssc-miR-148b-5p	11.85	14.0961	0.020668	0.0547507	-0.250409	down		ssc-miR-23a	776.817	945.552	0	0	-0.28358
ssc-miR-362	36.1235	37.1036	0.020433	0.054748	-0.0386215	down		ssc-miR-23b	72.6612	90.2553	7e-05	0.00051	-0.31283
ssc-miR-4331	6.4984	4.5367	0.020235	0.0544252	0.518441	up		ssc-miR-2411	5.4536	5.1088	0.04415	0.08059	0.09422
ssc-miR-7137-5p	6.8807	9.0734	0.019601	0.0529227	-0.399088	down		ssc-miR-24-1-5p	212.53	205.416	0.00525	0.02142	0.04912
unconservative_7_263682	2.8669	4.6987	0.019352	0.0526554	-0.71277	down		ssc-miR-24-3p	2417.55	3070.38	0	0	-0.34487
unconservative_7_264027	8.4097	10.6936	0.019361	0.0524765	-0.346621	down		ssc-miR-2483	3.3684	4.0445	0.04568	0.08083	-0.2639
unconservative_X_315144	43.7686	44.2327	0.019204	0.0524561	-0.0152171	down		ssc-miR-26a	22297.2	25590.8	0	0	-0.19876
ssc-miR-2366	44.9154	44.2327	0.018921	0.0520884	0.0220969	up		ssc-miR-27a	846.11	890.207	0.00018	0.00123	-0.0733
ssc-miR-378b-3p	42.4307	41.3162	0.018994	0.0520851	0.0384009	up		ssc-miR-27b-3p	1330.2	1443.23	0	0	-0.11767
ssc-miR-1249	5.1605	7.2911	0.018645	0.0515307	-0.498626	down		ssc-miR-27b-5p	17.9648	21.7124	0.00903	0.03009	-0.27335
unconservative_4_217598	4.5871	2.7544	0.018197	0.0506916	0.735844	up		ssc-miR-28-3p	1700.56	1516.46	0	0	0.1653
unconservative_7_265122	3.8226	2.1063	0.018101	0.0506251	0.859843	up		ssc-miR-28-5p	472.217	449.999	0.00117	0.00649	0.06953
ssc-miR-504	1.7202	3.4025	0.017543	0.0492607	-0.984019	down		ssc-miR-296-3p	1439.43	1489	0.00029	0.00187	-0.04885
unconservative_1_31016	4.2048	6.319	0.017189	0.0484606	-0.587659	down		ssc-miR-296-5p	97.5232	98.5571	0.01042	0.03313	-0.01521
unconservative_2_176655	6.4984	4.3747	0.016885	0.0477954	0.5709	up		ssc-miR-29a	1973.4	2213.6	0	0	-0.16571
ssc-miR-210	12.9968	10.3696	0.016189	0.0461979	0.325796	up		ssc-miR-29b	13.7944	20.0094	0.00114	0.00647	-0.5366
unconservative_1_9873	3.4403	5.5088	0.016105	0.0461458	-0.679204	down		ssc-miR-29c	1.7644	2.3415	0.05803	0.0941	-0.40826
ssc-miR-1306-3p	32.8743	35.6454	0.015994	0.0460155	-0.116756	down		ssc-miR-30a-3p	11.3884	14.262	0.01222	0.03683	-0.32461
unconservative_10_40828	51.4138	49.2554	0.015845	0.0459636	0.0618737	up		ssc-miR-30a-5p	194.405	204.777	0.00359	0.01652	-0.07499
unconservative_2_158081	5.7339	8.1012	0.015777	0.0459562	-0.498619	down		ssc-miR-30b-3p	4.1704	6.386	0.01287	0.03763	-0.61473
ssc-miR-7142-3p	58.2945	56.7086	0.015891	0.0459073	0.0397922	up		ssc-miR-30b-5p	38.1752	84.7208	0	0	-1.15008
unconservative_13_82975	51.6049	49.2554	0.015455	0.0452059	0.0672262	up		ssc-miR-30c-1-3p	3.5288	4.4702	0.03855	0.07557	-0.34116
ssc-miR-532-3p	1.9113	3.7266	0.015252	0.0447988	-0.963306	down		ssc-miR-30c-3p	3.5288	2.5544	0.04022	0.0773	0.46619
unconservative_13_71749	53.3251	50.8757	0.015083	0.0444885	0.067838	up		ssc-miR-30c-5p	1004.26	902.34	0	0	0.1544
unconservative_X_315322	8.6008	6.1569	0.014918	0.0441875	0.482267	up		ssc-miR-30d	6913.88	6210.16	0	0	0.15486
unconservative_8_290514	51.6049	48.9314	0.014777	0.0441424	0.0767475	up		ssc-miR-30e-3p	63.5184	65.9885	0.01145	0.03497	-0.05504
ssc-miR-676-3p	68.6154	67.0781	0.014817	0.0440743	0.0326906	up		ssc-miR-30e-5p	508.468	523.864	0.00249	0.01226	-0.04304
unconservative_11_51214	51.9872	49.2554	0.014617	0.0439449	0.0778746	up		ssc-miR-32	17.8044	21.9252	0.0074	0.02645	-0.30036
unconservative_2_168028	51.9872	49.2554	0.014617	0.0439449	0.0778746	up		ssc-miR-320	8315.93	9312.69	0	0	-0.16332
unconservative_10_43179	35.1678	38.3998	0.014188	0.0429309	-0.126844	down		ssc-miR-324	1.604	4.6831	0.00086	0.00525	-1.54579
ssc-miR-374a-3p	30.0073	26.734	0.014075	0.0427734	0.166638	up		ssc-miR-326	2.8872	5.5345	0.00523	0.02147	-0.93878
ssc-miR-16	85.8171	86.5211	0.013709	0.0418423	-0.0117869	down		ssc-miR-328	365.551	351.655	0.00269	0.01291	0.05591
ssc-miR-374a-5p	19.6863	23.0075	0.013443	0.0415726	-0.224912	down		ssc-miR-331-3p	7.3784	7.4503	0.0383	0.07571	-0.01399
unconservative_3_182467	12.4234	9.5594	0.013378	0.0415547	0.378068	up		ssc-miR-331-5p	4.4912	5.5345	0.03468	0.07079	-0.30135
unconservative_13_77545	17.2016	14.0961	0.013495	0.0415504	0.287247	up		ssc-miR-335	7.6992	10.6433	0.0096	0.03153	-0.46717
ssc-miR-106a	20.2597	17.0126	0.013289	0.0414617	0.252009	up		ssc-miR-339	1393.07	1621.83	0	0	-0.21935
ssc-miR-143-5p	99.5784	98.8349	0.012776	0.0400391	0.0108123	up		ssc-miR-339-3p	3.208	1.0643	0.00443	0.01959	1.59177
ssc-miR-19b	44.1509	40.5061	0.012621	0.0397307	0.124304	up		ssc-miR-339-5p	1393.07	1621.83	0	0	-0.21935
unconservative_14_109162	3.2492	5.5088	0.012151	0.0384234	-0.761654	down		ssc-miR-340	274.444	257.994	0.00165	0.00851	0.08918
ssc-miR-126-3p	32.3009	36.1315	0.011998	0.0382845	-0.161683	down		ssc-miR-345-3p	5.2932	5.9603	0.03944	0.07623	-0.17124
ssc-miR-3613	2.1024	0.6481	0.012015	0.0381653	1.69775	up		ssc-miR-34c	7.0576	5.7474	0.02919	0.06313	0.29627
unconservative_4_203976	59.059	55.0883	0.011467	0.0369258	0.100411	up		ssc-miR-361-3p	555.465	578.996	0.00119	0.00655	-0.05986
ssc-miR-486	18.7307	22.3594	0.01151	0.0368951	-0.255477	down		ssc-miR-361-5p	89.9844	100.473	0.00227	0.01125	-0.15906
ssc-miR-30e-3p	91.551	88.1413	0.01126	0.0364264	0.0547575	up		ssc-miR-362	45.8744	55.9838	0.00098	0.00582	-0.28732
ssc-miR-155-3p	6.6895	4.2126	0.011042	0.0358865	0.667187	up		ssc-miR-363	115.488	126.443	0.00251	0.01227	-0.13074
unconservative_X_322561	1.1468	2.9164	0.010781	0.0352833	-1.34657	down		ssc-miR-365-3p	471.897	334.2	0	0	0.49776
ssc-miR-19a	11.85	8.7493	0.010583	0.0348792	0.437648	up		ssc-miR-365-5p	263.056	290.137	0.00018	0.00123	-0.14136
ssc-miR-122	148.699	149.873	0.010365	0.0346487	-0.0113446	down		ssc-miR-369	2.8872	4.6831	0.01688	0.04604	-0.69779
ssc-miR-204	4.2048	6.805	0.009889	0.0332157	-0.694558	down		ssc-miR-374a-3p	23.5788	29.5884	0.00324	0.0151	-0.32754
unconservative_16_133576	4.0137	1.9443	0.009499	0.0320591	1.04568	up		ssc-miR-374a-5p	29.3532	30.8656	0.0172	0.04636	-0.07248
unconservative_2_163191	199.348	198.156	0.009007	0.0306938	0.00865248	up		ssc-miR-374b-3p	2.5664	1.7029	0.04599	0.08116	0.59175
unconservative_10_35611	0.9556	2.7544	0.008495	0.0291613	-1.52726	down		ssc-miR-374b-5p	76.19	87.9138	0.00121	0.00663	-0.20649
ssc-miR-499-5p	34.7855	29.9745	0.008163	0.0282287	0.21475	up		ssc-miR-378	1611.54	1473.46	0	0	0.12923
ssc-miR-425-3p	9.5565	13.124	0.007913	0.0274996	-0.457653	down		ssc-miR-378b-3p	57.1024	67.9043	0.00107	0.0061	-0.24995
ssc-miR-133b	1.1468	3.0785	0.007677	0.0269463	-1.42461	down		ssc-miR-382	30.3156	34.0586	0.01025	0.0329	-0.16796
unconservative_8_285603	71.1001	65.2959	0.007703	0.026903	0.122859	up		ssc-miR-421-3p	22.6164	20.0094	0.01489	0.0421	0.17669
unconservative_1_14317	4.7782	2.4304	0.007564	0.0267503	0.975273	up		ssc-miR-423-3p	12006.3	11185.1	0	0	0.10221
unconservative_15_114567	29.6251	34.6732	0.007417	0.0264301	-0.227001	down		ssc-miR-423-5p	11785.5	10930.7	0	0	0.10863
unconservative_8_289957	2.2936	0.6481	0.00735	0.026325	1.82333	up		ssc-miR-425-3p	27.4284	35.1229	0.00145	0.00757	-0.35674
ssc-miR-345-3p	2.6758	5.1848	0.006976	0.0251136	-0.954318	down		ssc-miR-425-5p	175.959	214.143	0	0	-0.28334
unconservative_14_107675	3.4403	6.1569	0.006875	0.0250065	-0.83967	down		ssc-miR-432-3p	48.12	62.157	0.00011	0.00081	-0.36928
ssc-miR-9860-5p	1.3379	3.4025	0.006897	0.0249572	-1.34662	down		ssc-miR-4331	6.416	5.7474	0.03855	0.07579	0.15876
unconservative_1_19226	6.6895	3.8886	0.006695	0.0245425	0.782648	up		ssc-miR-4334-3p	458.263	550.898	0	0	-0.26561
unconservative_4_209942	5.925	3.2405	0.006313	0.0234483	0.870599	up		ssc-miR-450a	175.798	174.338	0.00779	0.02756	0.01204
ssc-miR-140-5p	64.984	58.4908	0.006191	0.0231175	0.151875	up		ssc-miR-450b-5p	207.237	183.491	0.00016	0.00112	0.17557
unconservative_4_202654	21.2154	26.248	0.005875	0.0220548	-0.307096	down		ssc-miR-450c-3p	4.01	5.9603	0.01662	0.0457	-0.57178
unconservative_13_80236	4.7782	7.9392	0.005668	0.0213921	-0.732526	down		ssc-miR-450c-5p	614.653	556.858	2e-06	1.7e-05	0.14246
unconservative_1_15855	3.6315	1.4582	0.005542	0.0210296	1.31638	up		ssc-miR-452	4.01	3.4059	0.04781	0.0832	0.23557
unconservative_9_299893	14.5258	19.2809	0.004769	0.0182942	-0.408555	down		ssc-miR-455-3p	26.6264	39.1674	3e-05	0.00021	-0.5568
ssc-miR-148b-3p	277.329	287.755	0.004432	0.0170949	-0.0532461	down		ssc-miR-455-5p	243.648	288.221	0	0	-0.24238
unconservative_6_235828	7.8363	4.5367	0.004155	0.016115	0.788529	up		ssc-miR-486	33.3632	35.5487	0.01478	0.04214	-0.09154
ssc-miR-455-3p	7.454	11.5037	0.003689	0.0145488	-0.626011	down		ssc-miR-493-3p	4.812	5.7474	0.03622	0.07286	-0.25627
ssc-miR-23a	1237.18	1237.7	0.003646	0.0145426	-0.000611265	down		ssc-miR-493-5p	10.2656	6.8117	0.00572	0.02269	0.59173
unconservative_2_170290	2.8669	5.8329	0.00365	0.0144763	-1.02472	down		ssc-miR-497	1.604	3.193	0.01608	0.04473	-0.99324
ssc-miR-421-3p	38.2259	45.3668	0.003558	0.0142727	-0.247086	down		ssc-miR-499-3p	28.7116	32.3557	0.01053	0.03333	-0.17239
unconservative_13_79195	110.664	100.941	0.00351	0.014161	0.13267	up		ssc-miR-500	149.814	154.967	0.00671	0.02544	-0.04879
unconservative_X_315145	4.7782	2.1063	0.003476	0.0141049	1.18176	up		ssc-miR-504	9.3032	7.4503	0.02117	0.05389	0.32043
ssc-miR-452	2.2936	0.4861	0.003395	0.0138563	2.23829	up		ssc-miR-505	418.804	454.682	0.0001	0.0007	-0.11858
unconservative_9_303764	4.2048	1.6202	0.002705	0.0111701	1.37587	up		ssc-miR-532-3p	10.2656	19.3708	1e-05	9.52e-05	-0.91607
unconservative_17_139770	5.925	2.7544	0.00218	0.00921904	1.10508	up		ssc-miR-532-5p	2898.75	2421.78	0	0	0.25936
ssc-miR-185	844.983	824.38	0.00216	0.00918982	0.0356121	up		ssc-miR-542-3p	86.1348	80.4635	0.00687	0.02574	0.09826
ssc-miR-182	120.412	132.536	0.002211	0.00918415	-0.138411	down		ssc-miR-545-5p	1.2832	2.1287	0.04517	0.08074	-0.73023
unconservative_6_248791	99.5784	110.987	0.002184	0.00918065	-0.156482	down		ssc-miR-574	254.555	422.54	0	0	-0.73111
ssc-miR-378	1036.49	1015.57	0.002188	0.00914271	0.0294239	up		ssc-miR-615	126.074	110.903	0.00072	0.00449	0.18497
ssc-miR-369	3.8226	1.2962	0.002114	0.00904895	1.56027	up		ssc-miR-628	4.812	8.3018	0.00324	0.01519	-0.78679
ssc-miR-218-5p	5.7339	2.5924	0.002051	0.00888767	1.14523	up		ssc-miR-664-5p	27.7492	31.2913	0.01085	0.03343	-0.17332
ssc-miR-218b	5.7339	2.5924	0.002051	0.00888767	1.14523	up		ssc-miR-671-3p	94.3152	76.6319	9e-05	0.00064	0.29955
unconservative_6_255137	9.1742	14.0961	0.002022	0.00887152	-0.619642	down		ssc-miR-671-5p	34.486	33.42	0.0172	0.04653	0.0453
ssc-miR-192	7.0718	3.5645	0.001994	0.00885942	0.988378	up		ssc-miR-676-3p	154.625	226.916	0	0	-0.55338
ssc-miR-542-3p	92.6977	81.8223	0.002005	0.00885226	0.180039	up		ssc-miR-676-5p	9.3032	7.2375	0.01854	0.04919	0.36224
ssc-miR-17-5p	190.556	176.283	0.00196	0.00876382	0.112325	up		ssc-miR-6782-3p	75.388	72.3745	0.01035	0.03307	0.05885
ssc-miR-181b	188.645	174.338	0.001923	0.0086535	0.113782	up		ssc-miR-7	526.433	455.108	0	0	0.21004
ssc-miR-361-5p	50.4582	59.787	0.001866	0.00845117	-0.244743	down		ssc-miR-708-3p	53.0924	66.2014	0.00028	0.00182	-0.31836
ssc-miR-186	433.864	414.783	0.001846	0.00841488	0.0648865	up		ssc-miR-708-5p	108.27	121.334	0.00132	0.00702	-0.16435
ssc-miR-15a	19.1129	13.286	0.001602	0.00735035	0.52464	up		ssc-miR-7134-3p	3237.99	3237.06	0.00184	0.0094	0.00042
ssc-let-7g	7274.58	7278.79	0.001499	0.00692301	-0.000834904	down		ssc-miR-7134-5p	70.2552	85.5722	0.0002	0.00139	-0.28454
ssc-miR-151-5p	49.3114	59.1389	0.001414	0.0065737	-0.262186	down		ssc-miR-7136-5p	2.406	1.4901	0.04352	0.08007	0.69123
ssc-miR-450a	162.078	177.579	0.001334	0.00624312	-0.131774	down		ssc-miR-7137-3p	2.8872	3.4059	0.05211	0.08749	-0.23837
ssc-miR-30d	2588.08	2552.7	0.001269	0.00597878	0.0198625	up		ssc-miR-7137-5p	7.8596	7.6632	0.03727	0.07432	0.03651
unconservative_3_191876	26.7581	34.8353	0.00117	0.00570375	-0.380574	down		ssc-miR-7139-3p	6.7368	6.1731	0.03861	0.07547	0.12607
unconservative_1_30657	0.7645	3.2405	0.001184	0.00569293	-2.08363	down		ssc-miR-7139-5p	5.614	5.3217	0.04377	0.08033	0.07714
ssc-miR-874	11.4678	17.3366	0.001171	0.00566926	-0.596232	down		ssc-miR-7142-3p	66.8868	69.3944	0.0112	0.03433	-0.0531
unconservative_6_244324	0.1911	2.1063	0.001188	0.00565407	-3.46231	down		ssc-miR-7144-5p	17.644	18.3065	0.02385	0.05774	-0.05318
unconservative_4_217433	11.0855	6.319	0.001025	0.00503182	0.810906	up		ssc-miR-744	1337.74	1429.61	1e-06	8.85e-06	-0.09583
unconservative_X_315141	12.4234	18.6328	0.00099	0.00489423	-0.584784	down		ssc-miR-769-3p	3.5288	4.2573	0.04382	0.08019	-0.27076
ssc-miR-331-5p	6.8807	3.0785	0.000858	0.00427174	1.16033	up		ssc-miR-769-5p	259.527	267.573	0.00464	0.02	-0.04405
ssc-miR-2320-3p	186.733	205.609	0.000704	0.00353006	-0.138923	down		ssc-miR-7857-3p	522.102	395.931	0	0	0.39908
ssc-miR-935	0.9556	3.8886	0.000521	0.00266965	-2.02477	down		ssc-miR-874	43.308	44.0633	0.01555	0.04363	-0.02494
ssc-miR-450b-5p	250.762	273.335	0.000508	0.00262218	-0.124354	down		ssc-miR-885-3p	6.416	7.6632	0.02915	0.06325	-0.25627
ssc-miR-183	188.071	208.688	0.000441	0.0022932	-0.150064	down		ssc-miR-885-5p	2.0852	2.9801	0.04258	0.07962	-0.51517
ssc-miR-181a	197.819	177.255	0.000382	0.00200122	0.158356	up		ssc-miR-9	62.3956	41.9347	0	0	0.5733
ssc-miR-199b-5p	3500.15	3566.16	0.000377	0.00198988	-0.026953	down		ssc-miR-9-1	62.3956	41.9347	0	0	0.5733
ssc-miR-23b	33.2565	43.9086	0.000327	0.00173905	-0.400867	down		ssc-miR-9-2	62.3956	41.9347	0	0	0.5733
ssc-miR-149	11.85	18.9569	0.000322	0.00172553	-0.677836	down		ssc-miR-92a	16655.1	17447.8	0	0	-0.06708
unconservative_6_243638	10.5121	17.3366	0.000309	0.0016686	-0.72177	down		ssc-miR-92b-3p	367.797	362.086	0.00487	0.02023	0.02258
ssc-miR-7144-5p	7.6452	13.7721	0.00028	0.00152372	-0.849122	down		ssc-miR-92b-5p	45.2328	57.0482	0.00037	0.00232	-0.33481
unconservative_12_56104	16.6283	9.8835	0.000256	0.001404	0.750547	up		ssc-miR-935	3.208	2.3415	0.04444	0.08079	0.45424
ssc-miR-181d-5p	14.717	8.2632	0.000206	0.00113868	0.832711	up		ssc-miR-95	6.2556	4.4702	0.02088	0.05337	0.48481
unconservative_2_168684	30.1984	20.7391	0.000168	0.000936	0.542119	up		ssc-miR-96-5p	1.9248	3.193	0.02781	0.0617	-0.7302
ssc-miR-7134-5p	22.9355	32.891	0.000163	0.000915408	-0.520111	down		ssc-miR-98	243.808	324.621	0	0	-0.41301
unconservative_2_154133	29.2428	19.767	0.000138	0.00078761	0.564988	up		ssc-miR-9820-5p	6.0952	2.7673	0.00188	0.00953	1.13919
ssc-miR-107	92.6977	76.1515	0.000139	0.000786919	0.283661	up		ssc-miR-9843-3p	7.8596	6.8117	0.0318	0.06689	0.20644
ssc-miR-4334-3p	145.832	167.857	0.00013	0.000748033	-0.202931	down		ssc-miR-9860-5p	3.8496	5.5345	0.02123	0.05385	-0.52374
unconservative_3_187783	48.738	36.4555	0.000126	0.000734041	0.418911	up		ssc-miR-99a	14945.1	18799.5	0	0	-0.33102
ssc-miR-32	24.4646	15.5543	9.7e-05	0.000572218	0.653382	up		ssc-miR-99b	24675.4	20915.6	0	0	0.2385
ssc-miR-145-3p	223.048	250.49	9.3e-05	0.000555626	-0.167398	down		unconservative_1_14317	4.812	3.6187	0.03296	0.0688	0.41117
ssc-miR-432-5p	24.0823	34.8353	9.3e-05	0.000555626	-0.532577	down		unconservative_1_15855	0.9624	3.193	0.00252	0.01226	-1.7302
ssc-miR-24-1-5p	281.342	252.11	8.3e-05	0.000502293	0.158274	up		unconservative_1_19226	0.802	3.193	0.00126	0.00684	-1.99324
ssc-miR-129a-3p	21.5976	32.0808	7.7e-05	0.000470035	-0.570839	down		unconservative_1_19508	3.3684	2.7673	0.05129	0.08652	0.28358
unconservative_17_136564	9.5565	4.0506	7.4e-05	0.000455684	1.23835	up		unconservative_1_31016	3.5288	5.1088	0.02294	0.05634	-0.53381
ssc-miR-155-5p	1086.76	1031.61	6.7e-05	0.00041623	0.0751384	up		unconservative_1_9090	2.8872	5.7474	0.00374	0.0171	-0.99324
unconservative_3_178411	15.4815	8.2632	6.6e-05	0.000413679	0.905773	up		unconservative_1_9873	8.5012	7.4503	0.03094	0.06589	0.19037
ssc-miR-500	67.4687	84.9008	5.3e-05	0.000335189	-0.33156	down		unconservative_10_34935	6.0952	6.5989	0.03918	0.07594	-0.11455
ssc-miR-29b	33.4476	22.3594	4.4e-05	0.0002808	0.581021	up		unconservative_10_40828	147.728	146.239	0.00847	0.02893	0.01462
unconservative_12_58406	0.9556	5.0228	2.2e-05	0.000141688	-2.39401	down		unconservative_10_41908	3.208	4.4702	0.03033	0.06498	-0.47867
ssc-miR-532-5p	1422.96	1495.81	2e-05	0.00013	-0.0720334	down		unconservative_10_43179	17.0024	14.9006	0.01821	0.0487	0.19037
unconservative_4_204423	39.3727	26.248	1.2e-05	7.8729e-05	0.584988	up		unconservative_11_51214	147.728	145.813	0.00836	0.02886	0.01882
ssc-miR-328	16.246	27.2201	1.1e-05	7.28491e-05	-0.744588	down		unconservative_12_52393	2.8872	3.6187	0.04611	0.08074	-0.3258
ssc-miR-1	202.979	235.908	8e-06	5.34857e-05	-0.216889	down		unconservative_12_56104	3.208	5.3217	0.01218	0.03686	-0.73021
ssc-miR-1306-5p	14.5258	25.9239	3e-06	2.025e-05	-0.835665	down		unconservative_12_58662	2.5664	1.9158	0.0549	0.09072	0.4218
ssc-miR-615	26.1847	41.4783	1e-06	6.81553e-06	-0.663633	down		unconservative_12_59201	1.7644	2.1287	0.06752	0.10481	-0.27079
ssc-let-7a	42402.8	48234.2	0	0	-0.185896	down		unconservative_12_62703	12.6716	8.7275	0.00472	0.02005	0.53796
ssc-let-7c	2268.51	2887.44	0	0	-0.348042	down		unconservative_13_69236	9.4636	10.4304	0.02914	0.06342	-0.14033
ssc-let-7d-3p	173.737	253.244	0	0	-0.543628	down		unconservative_13_71749	151.738	149.219	0.00807	0.02828	0.02415
ssc-let-7d-5p	4681.14	5429.12	0	0	-0.213857	down		unconservative_13_73492	2.406	1.2772	0.03222	0.06758	0.91365
ssc-let-7e	4325.07	5379.54	0	0	-0.314759	down		unconservative_13_74147	3.208	2.3415	0.04444	0.08079	0.45424
ssc-let-7f	20791.1	20116.5	0	0	0.0475857	up		unconservative_13_77545	2.7268	1.2772	0.01949	0.05038	1.09422
ssc-let-7i	30204.6	23926	0	0	0.336188	up		unconservative_13_79195	183.177	255.44	0	0	-0.47975
ssc-miR-100	121904	134429	0	0	-0.141099	down		unconservative_13_80236	6.0952	4.0445	0.01582	0.04419	0.59171
ssc-miR-101	1684.23	1356.47	0	0	0.312235	up		unconservative_13_82975	147.889	146.026	0.00837	0.02875	0.01828
ssc-miR-103	1601.28	1495.81	0	0	0.0983007	up		unconservative_13_89891	4.3308	6.1731	0.01898	0.0498	-0.51136
ssc-miR-10a-5p	1152.13	2018.5	0	0	-0.808983	down		unconservative_14_103764	6.2556	5.5345	0.03842	0.07574	0.1767
ssc-miR-10b	10288.3	16742.6	0	0	-0.702521	down		unconservative_14_106025	2.406	3.6187	0.03099	0.0655	-0.58883
ssc-miR-125a	487.189	838.801	0	0	-0.783847	down		unconservative_14_107675	6.5764	4.2573	0.01234	0.03687	0.62736
ssc-miR-125b	4419.68	6635.06	0	0	-0.58617	down		unconservative_14_109162	2.0852	0.6386	0.01289	0.03751	1.7072
ssc-miR-127	181.764	243.199	0	0	-0.420069	down		unconservative_15_111716	12.03	15.965	0.00626	0.02425	-0.40828
ssc-miR-128	773.118	1069.69	0	0	-0.468425	down		unconservative_15_111959	2.7268	4.8959	0.00996	0.03217	-0.84437
ssc-miR-1296-5p	20.642	36.4555	0	0	-0.820554	down		unconservative_15_114567	28.5512	33.42	0.0067	0.02553	-0.22716
ssc-miR-129a-5p	906.144	1175.97	0	0	-0.376043	down		unconservative_15_124856	4.6516	3.8316	0.04139	0.07889	0.27978
ssc-miR-129b	906.336	1175.81	0	0	-0.37554	down		unconservative_16_128889	2.5664	1.4901	0.03567	0.07197	0.78434
ssc-miR-1307	1611.22	2128.68	0	0	-0.401803	down		unconservative_16_129569	2.5664	4.2573	0.01812	0.04864	-0.73019
ssc-miR-132	46.8267	23.8176	0	0	0.975303	up		unconservative_16_130543	2.7268	1.4901	0.02872	0.06301	0.8718
ssc-miR-133a-3p	98.0494	174.986	0	0	-0.835662	down		unconservative_16_133042	42.0248	92.384	0	0	-1.1364
ssc-miR-1343	45.6799	76.7996	0	0	-0.749539	down		unconservative_17_135489	1.2832	2.3415	0.03352	0.06936	-0.86769
ssc-miR-140-3p	406.532	524.635	0	0	-0.367945	down		unconservative_17_139175	2.2456	2.5544	0.06332	0.10055	-0.18588
ssc-miR-143-3p	29692.1	33630.4	0	0	-0.179687	down		unconservative_18_148982	5.2932	2.3415	0.00272	0.01284	1.17671
ssc-miR-145-5p	177.368	375.735	0	0	-1.08297	down		unconservative_18_149123	2.7268	2.1287	0.05555	0.09148	0.35724
ssc-miR-146a-5p	83.1413	50.8757	0	0	0.708589	up		unconservative_2_153465	5.4536	6.8117	0.02803	0.0618	-0.32081
ssc-miR-146b	64.984	133.67	0	0	-1.04052	down		unconservative_2_154133	9.1428	12.772	0.0062	0.02416	-0.48228
ssc-miR-148a-3p	9786.21	11694	0	0	-0.256941	down		unconservative_2_155715	3.6892	3.193	0.05135	0.08641	0.2084
ssc-miR-148a-5p	193.041	250.814	0	0	-0.377712	down		unconservative_2_158081	24.862	13.4106	3e-06	2.52e-05	0.89057
ssc-miR-151-3p	1732.01	2009.59	0	0	-0.21445	down		unconservative_2_158711	5.7744	4.8959	0.03755	0.07467	0.2381
ssc-miR-152	250.188	308.332	0	0	-0.301472	down		unconservative_2_163191	324.008	373.155	1e-06	8.85e-06	-0.20374
ssc-miR-18a	59.6324	40.1821	0	0	0.569543	up		unconservative_2_163675	79.8792	159.65	0	0	-0.99902
ssc-miR-191	2604.33	3457.93	0	0	-0.408995	down		unconservative_2_164694	3.5288	1.7029	0.01259	0.03736	1.05118
ssc-miR-193a-5p	720.367	1027.56	0	0	-0.512418	down		unconservative_2_165259	3.208	2.5544	0.05092	0.08622	0.32869
ssc-miR-196a	100.725	137.883	0	0	-0.453018	down		unconservative_2_166720	2.406	1.7029	0.05376	0.09004	0.49864
ssc-miR-196b-5p	22.5533	42.7745	0	0	-0.923412	down		unconservative_2_168028	149.172	146.878	0.00821	0.02862	0.02236
ssc-miR-199a-3p	9722.37	11339.3	0	0	-0.221949	down		unconservative_2_168684	10.9072	8.9404	0.01994	0.05134	0.28687
ssc-miR-199a-5p	3223.78	3416.12	0	0	-0.0836072	down		unconservative_2_169204	2.7268	3.193	0.05459	0.09054	-0.2277
ssc-miR-199b-3p	9720.84	11338.5	0	0	-0.222073	down		unconservative_2_169220	1.1228	2.1287	0.0352	0.07143	-0.92287
ssc-miR-206	783.822	1518.82	0	0	-0.954351	down		unconservative_2_170290	6.5764	5.1088	0.02682	0.05969	0.36431
ssc-miR-20a	1033.05	852.411	0	0	0.277296	up		unconservative_3_178013	6.8972	4.2573	0.00868	0.02908	0.69607
ssc-miR-21	515360	472301	0	0	0.125871	up		unconservative_3_178411	5.9348	4.6831	0.03098	0.06577	0.34174
ssc-miR-212	271.022	138.045	0	0	0.973271	up		unconservative_3_180323	12.03	12.772	0.02792	0.06176	-0.08635
ssc-miR-214	141.054	253.244	0	0	-0.844287	down		unconservative_3_182121	5.7744	4.4702	0.03007	0.06463	0.36933
ssc-miR-221-3p	6087.66	3024.51	0	0	1.00919	up		unconservative_3_182467	4.01	5.5345	0.02469	0.05855	-0.46485
ssc-miR-221-5p	2822.03	3285.21	0	0	-0.219254	down		unconservative_3_184156	4.1704	4.8959	0.04176	0.07927	-0.23139
ssc-miR-222	10186.2	8418.95	0	0	0.274909	up		unconservative_3_187783	46.6764	40.2317	0.00446	0.01955	0.21436
ssc-miR-2320-5p	74.5405	103.21	0	0	-0.469481	down		unconservative_3_191876	22.456	27.6726	0.00483	0.02018	-0.30136
ssc-miR-24-3p	3534.56	2652.5	0	0	0.414175	up		unconservative_4_199699	5.9348	11.4948	0.00027	0.00178	-0.95371
ssc-miR-26a	8271.12	10853.4	0	0	-0.391988	down		unconservative_4_201106	0.802	2.5544	0.00636	0.02451	-1.67131
ssc-miR-27a	2572.6	1475.56	0	0	0.801969	up		unconservative_4_203976	4.1704	4.8959	0.04176	0.07927	-0.23139
ssc-miR-27b-3p	1093.83	949.139	0	0	0.204701	up		unconservative_4_204423	3.5288	1.4901	0.00781	0.0275	1.24377
ssc-miR-28-3p	1074.72	1544.09	0	0	-0.522798	down		unconservative_4_206111	1.1228	2.9801	0.00718	0.02648	-1.40826
ssc-miR-28-5p	388.375	469.061	0	0	-0.272325	down		unconservative_4_207517	2.2456	2.3415	0.06801	0.10521	-0.06033
ssc-miR-296-3p	792.996	1017.84	0	0	-0.360122	down		unconservative_4_207543	3.8496	5.1088	0.0305	0.06515	-0.40828
ssc-miR-296-5p	33.4476	55.7364	0	0	-0.736717	down		unconservative_4_208604	1.9248	2.5544	0.05451	0.09064	-0.40828
ssc-miR-29a	2694.35	2212.44	0	0	0.284297	up		unconservative_4_208847	3.3684	7.2375	0.00092	0.00553	-1.10343
ssc-miR-30a-5p	166.665	116.658	0	0	0.514669	up		unconservative_4_213518	3.5288	1.7029	0.01259	0.03736	1.05118
ssc-miR-30b-5p	31.1541	59.3009	0	0	-0.928632	down		unconservative_4_217313	2.8872	4.4702	0.02161	0.05402	-0.63067
ssc-miR-30c-5p	261.274	406.357	0	0	-0.637186	down		unconservative_4_217433	4.812	5.3217	0.04314	0.07958	-0.14525
ssc-miR-30e-5p	592.119	472.625	0	0	0.32519	up		unconservative_4_217598	13.4736	14.4749	0.02536	0.05951	-0.10342
ssc-miR-320	3663.38	4494.56	0	0	-0.295005	down		unconservative_5_226985	1.2832	2.1287	0.04517	0.08074	-0.73023
ssc-miR-339	645.635	854.031	0	0	-0.403569	down		unconservative_5_227231	2.5664	4.4702	0.01372	0.0396	-0.80059
ssc-miR-339-5p	645.635	854.031	0	0	-0.403569	down		unconservative_5_227325	4.812	5.5345	0.03993	0.07695	-0.20182
ssc-miR-340	214.829	162.349	0	0	0.404097	up		unconservative_5_228420	20.6916	20.4352	0.02298	0.05624	0.01799
ssc-miR-361-3p	209.287	311.087	0	0	-0.571837	down		unconservative_5_229805	1.7644	2.3415	0.05803	0.0941	-0.40826
ssc-miR-363	359.323	257.943	0	0	0.47823	up		unconservative_5_230905	11.228	22.5638	1e-06	8.85e-06	-1.00691
ssc-miR-365-3p	184.631	250.652	0	0	-0.44104	down		unconservative_6_235828	4.1704	3.8316	0.05029	0.08567	0.12224
ssc-miR-365-5p	253.055	344.626	0	0	-0.445579	down		unconservative_6_238165	1.1228	2.3415	0.02475	0.05839	-1.06033
ssc-miR-374b-5p	62.8816	86.359	0	0	-0.457709	down		unconservative_6_241318	5.614	7.2375	0.02363	0.05762	-0.36646
ssc-miR-423-3p	4753.39	6199.54	0	0	-0.383205	down		unconservative_6_242597	15.8796	18.7322	0.01332	0.03861	-0.23835
ssc-miR-423-5p	3884.51	6461.54	0	0	-0.734143	down		unconservative_6_243638	15.7192	15.3264	0.02622	0.05855	0.03651
ssc-miR-425-5p	165.709	242.713	0	0	-0.550595	down		unconservative_6_248791	87.7388	94.5126	0.00557	0.02222	-0.10729
ssc-miR-450c-5p	521.974	594.468	0	0	-0.18762	down		unconservative_6_255137	19.248	30.227	3e-05	0.00021	-0.65113
ssc-miR-455-5p	308.292	248.546	0	0	0.310786	up		unconservative_7_263682	5.7744	5.1088	0.04034	0.07732	0.17669
ssc-miR-505	119.265	200.748	0	0	-0.751221	down		unconservative_7_264027	5.9348	4.0445	0.01849	0.04927	0.55324
ssc-miR-574	61.1614	121.842	0	0	-0.994323	down		unconservative_7_264074	17.644	18.7322	0.02244	0.0553	-0.08634
ssc-miR-671-3p	21.0242	37.4276	0	0	-0.832052	down		unconservative_7_265812	2.5664	2.7673	0.06218	0.09908	-0.10873
ssc-miR-6782-3p	55.8098	95.2704	0	0	-0.77151	down		unconservative_7_270919	6.5764	8.3018	0.02227	0.05518	-0.33613
ssc-miR-7	8936.06	5785.73	0	0	0.62714	up		unconservative_7_271628	2.8872	2.5544	0.05998	0.09646	0.17669
ssc-miR-708-3p	42.813	72.911	0	0	-0.768088	down		unconservative_7_272572	2.8872	2.9801	0.06037	0.09664	-0.04569
ssc-miR-708-5p	78.1719	142.906	0	0	-0.87034	down		unconservative_7_273307	1.7644	2.1287	0.06752	0.10481	-0.27079
ssc-miR-7134-3p	822.621	1225.39	0	0	-0.574942	down		unconservative_7_277204	3.0476	2.5544	0.05581	0.09168	0.25469
ssc-miR-744	821.665	913.332	0	0	-0.152588	down		unconservative_7_277288	9.4636	7.2375	0.01666	0.04562	0.3869
ssc-miR-769-5p	160.74	212.576	0	0	-0.403252	down		unconservative_7_278942	2.406	3.193	0.04602	0.0809	-0.40828
ssc-miR-7857-3p	711.957	1014.44	0	0	-0.510815	down		unconservative_8_285603	197.452	192.005	0.00613	0.02402	0.04036
ssc-miR-9	105.312	74.8553	0	0	0.492498	up		unconservative_8_290514	148.53	147.304	0.0085	0.02888	0.01197
ssc-miR-9-1	105.312	74.8553	0	0	0.492498	up		unconservative_9_296241	309.251	512.795	0	0	-0.7296
ssc-miR-9-2	105.312	74.8553	0	0	0.492498	up		unconservative_9_299630	9.4636	12.5591	0.0097	0.03166	-0.40827
ssc-miR-92a	9740.34	13594.8	0	0	-0.481014	down		unconservative_9_299893	16.2004	16.1778	0.02599	0.05881	0.00201
ssc-miR-92b-3p	270.83	409.112	0	0	-0.595106	down		unconservative_9_299939	3.3684	5.7474	0.00903	0.02995	-0.77085
ssc-miR-92b-5p	100.725	164.293	0	0	-0.705845	down		unconservative_9_303679	4.812	7.0246	0.01399	0.04014	-0.54578
ssc-miR-98	625.567	529.01	0	0	0.241869	up		unconservative_9_310762	81214.2	68533.8	0	0	0.24492
ssc-miR-99a	2166.64	3185.4	0	0	-0.556014	down		unconservative_9_312812	7.0576	7.4503	0.03762	0.07458	-0.07812
ssc-miR-99b	5940.49	9379.76	0	0	-0.658968	down		unconservative_X_315136	1.7644	3.193	0.02167	0.05398	-0.85573
unconservative_16_133042	224.577	115.847	0	0	0.954983	up		unconservative_X_315141	36.5712	35.3358	0.01651	0.04558	0.04958
unconservative_2_163675	145.067	81.6603	0	0	0.829015	up		unconservative_X_315144	48.2804	43.2119	0.00735	0.0264	0.16001
unconservative_6_242597	216.167	128.809	0	0	0.74691	up		unconservative_X_315145	3.0476	2.9801	0.05979	0.09639	0.03231
unconservative_9_296241	675.26	427.421	0	0	0.659787	up		unconservative_X_315322	2.2456	2.9801	0.04857	0.08336	-0.40826
unconservative_9_310762	47766.1	46280.5	0	0	0.0455825	up		unconservative_X_318200	3.0476	4.4702	0.02594	0.05888	-0.55267

## Sheet: Table S3
#ID	Associated Gene Name	E2_Count	E1_Count	E2_FPKM	E1_FPKM	FDR	log2FC
ENSSSCG00000024651	HEYL	2	94	0.0679936	2.84145	0	5.38497
ENSSSCG00000021865	INHBA	50	636	2.40294	29.6251	0	3.62397
ENSSSCG00000011808	SST	5	63	1.44034	16.9474	1.36032e-09	3.55662
ENSSSCG00000006159	HEY1	9	63	0.455049	2.89445	4.16072e-07	2.66938
ENSSSCG00000009320	FLT1	14	90	0.516752	3.25955	1.45531e-09	2.65702
ENSSSCG00000008090	IL1A	30	142	3.28496	17.0307	4.60215e-11	2.37417
ENSSSCG00000011596	TRH	11	60	1.90616	9.59037	1.43696e-05	2.33089
ENSSSCG00000000910	SOCS2	76	352	4.26757	19.2879	0	2.1762
ENSSSCG00000027315	LOC100738803	13	66	0.807329	3.62611	8.74026e-06	2.16724
ENSSSCG00000022576	VGF	55	250	115.682	512.648	4.44089e-16	2.1478
ENSSSCG00000008953	CXCL8	90	344	14.8667	64.9859	5.55112e-16	2.12804
ENSSSCG00000023165	SEMA7A	67	297	4.31613	18.695	0	2.11485
ENSSSCG00000029691	CORO1A	17	76	1.24541	5.26818	6.66662e-06	2.0807
ENSSSCG00000002501	BDKRB1	12	57	1.69418	7.09775	0.000132138	2.06677
ENSSSCG00000030575	TMEM158	35	161	4.6861	19.0757	6.99185e-12	2.02528
ENSSSCG00000000246	LOC100525396	342	1355	55.4104	223.164	0	2.00988
ENSSSCG00000030300	MT1X	215	891	126.324	504.682	0	1.99825
ENSSSCG00000027677	ABI3	41	178	3.3809	13.3051	4.44722e-12	1.9765
ENSSSCG00000021259	CDA	56	219	8.85121	34.6394	1.96498e-12	1.96847
ENSSSCG00000014985	MMP1	215	702	16.4738	59.7071	0	1.85773
ENSSSCG00000017705	CCL5	504	1754	145.128	523.258	0	1.8502
ENSSSCG00000009482	SPRY2	93	340	13.2967	47.1739	5.9952e-15	1.82692
ENSSSCG00000007067	JAG1	269	930	5.88724	20.5467	0	1.80325
ENSSSCG00000005992	SHAS2	68	208	5.96073	20.3703	1.66243e-08	1.77291
ENSSSCG00000004907	CCBE1	117	404	7.01794	23.276	4.10783e-15	1.72973
ENSSSCG00000008963	AREG	143	443	17.4266	57.1118	2.25375e-13	1.7125
ENSSSCG00000008959	CXCL2	98	306	16.3273	53.04	3.29509e-11	1.69979
ENSSSCG00000006105	GEM	49	149	3.47426	11.1592	1.47614e-06	1.68344
ENSSSCG00000021400		20	67	3.18374	10.2177	0.00159661	1.68229
ENSSSCG00000026527	HCN1	21	67	1.36418	4.30941	0.00302707	1.65943
ENSSSCG00000017091	TNIP1	988	3102	42.1791	130.122	0	1.62526
ENSSSCG00000026296		51	163	31.6938	96.2844	1.25522e-07	1.6031
ENSSSCG00000008870	GUCY1B3	103	277	8.02451	24.2253	4.02773e-08	1.59403
ENSSSCG00000014362	HBEGF	68	205	5.04106	14.7271	3.20525e-08	1.54666
ENSSSCG00000011884	HCLS1	116	323	6.65315	19.3014	1.77459e-09	1.53659
ENSSSCG00000022447	F3	456	1248	41.1745	119.311	6.77236e-15	1.5349
ENSSSCG00000026454	PMAIP1	432	1025	56.2143	156.041	2.2012e-10	1.47292
ENSSSCG00000013667	COL5A3	173	494	2.93901	8.08823	3.46467e-12	1.46049
ENSSSCG00000024430	HES4	462	1400	37.7047	103.373	0	1.45504
ENSSSCG00000010012	SLC35E4	35	105	2.17023	5.90327	0.000105274	1.44369
ENSSSCG00000006243	PENK	30	81	6.53262	17.2882	0.00650886	1.40406
ENSSSCG00000026326	CCNF	705	1909	20.377	53.0875	1.22125e-15	1.38143
ENSSSCG00000026658	GSG2	63	164	4.09339	10.6411	2.72486e-05	1.37828
ENSSSCG00000029756	ADGRG2	22	76	2.90653	7.44298	0.000295224	1.3566
ENSSSCG00000004565	CA12	73	186	14.5288	37.0684	1.44094e-05	1.35127
ENSSSCG00000001526	HMGA1	1017	2886	76.4502	194.482	0	1.34704
ENSSSCG00000027667	EML1	72	176	4.66528	11.8568	7.32807e-05	1.34567
ENSSSCG00000008977	CXCL10	240	545	54.4796	136.19	1.08653e-07	1.32183
ENSSSCG00000003805	PDE4B	80	191	4.14197	10.3422	6.86271e-05	1.32014
ENSSSCG00000003017	TGFB1	281	704	20.5075	50.7252	1.16775e-10	1.30655
ENSSSCG00000003377	ACOT7	55	139	4.24704	10.4374	0.00025427	1.29725
ENSSSCG00000018047	FAM83G	32	86	1.01032	2.4607	0.00438429	1.28429
ENSSSCG00000025588	FJX1	478	1272	37.8527	91.4489	4.09672e-14	1.27257
ENSSSCG00000002385	TGFB3	444	1052	15.5226	37.2819	2.07961e-10	1.26411
ENSSSCG00000015235	ETS1	486	1139	36.1858	86.1525	2.66939e-10	1.25147
ENSSSCG00000010272	ADAMTS14	65	161	1.77644	4.16076	0.000113641	1.2279
ENSSSCG00000009996	LIF	76	181	18.4567	42.6677	0.000114853	1.209
ENSSSCG00000006359	ADAMTS4	199	478	7.462	17.151	2.15453e-08	1.20066
ENSSSCG00000006811	SLC6A17	66	156	3.3522	7.65212	0.000460522	1.19075
ENSSSCG00000015770	VEGFC	583	1181	45.6472	104.034	8.75461e-07	1.18846
ENSSSCG00000009094	CCNA2	256	552	20.7393	47.1057	1.05857e-06	1.18353
ENSSSCG00000004154	TNFAIP3	176	413	4.94255	11.1655	1.94554e-07	1.17571
ENSSSCG00000008601	SDC1	453	819	23.5624	53.0311	0.000481505	1.17035
ENSSSCG00000005510	PHF19	56	134	4.6613	10.4735	0.00114037	1.16794
ENSSSCG00000011499	LRIG1	180	407	3.58182	8.04263	1.01146e-06	1.16698
ENSSSCG00000008535	CLIP4	93	189	7.26445	16.2589	0.00484039	1.16229
ENSSSCG00000021597	PHLDA2	108	252	119.14	266.601	1.35222e-05	1.16202
ENSSSCG00000006392	IGSF8	217	527	9.3503	20.9134	5.82896e-09	1.16134
ENSSSCG00000028924	AURKB	176	390	19.009	42.5083	3.07004e-06	1.16106
ENSSSCG00000009839	CIT	305	666	4.32777	9.63643	2.04915e-07	1.15486
ENSSSCG00000002135	PNP	135	284	22.9536	50.6945	0.000159953	1.14311
ENSSSCG00000012967	FOSL1	1341	3168	39.7111	87.3257	5.86997e-12	1.13686
ENSSSCG00000004509	LIPG	1684	3505	62.373	136.804	2.8126e-08	1.13312
ENSSSCG00000007351	FAM83D	83	183	5.21417	11.4248	0.00078046	1.13165
ENSSSCG00000000002	GTSE1	232	536	7.05141	15.3863	5.4608e-08	1.12566
ENSSSCG00000007541	PDGFA	156	381	12.0169	26.2138	7.18887e-08	1.12526
ENSSSCG00000024596	NOCT	103	227	5.07859	11.0185	0.000173318	1.11743
ENSSSCG00000017342	KIF18B	123	291	4.72662	10.2521	2.54905e-06	1.11704
ENSSSCG00000008427	KCNK12	523	1235	51.7342	111.465	1.14459e-10	1.1074
ENSSSCG00000026748	PLK1	368	801	24.7195	52.8779	9.20948e-08	1.09702
ENSSSCG00000003593	NKAIN1	61	134	3.38852	7.21374	0.00678082	1.09009
ENSSSCG00000008125		161	321	9.50227	20.2227	0.000445768	1.08963
ENSSSCG00000026302	MKI67	811	1780	7.08423	15.027	2.87514e-09	1.08488
ENSSSCG00000015581	CENPF	274	512	4.17641	8.836	0.000532705	1.08113
ENSSSCG00000022370	TNFSF9	171	382	16.816	35.4599	2.58521e-06	1.07635
ENSSSCG00000000683	CDCA3	147	313	16.5998	34.8979	5.7809e-05	1.07197
ENSSSCG00000017306	ITGB3	564	1045	14.3754	30.0681	9.53779e-05	1.06463
ENSSSCG00000016900	ESM1	303	624	87.1384	181.339	4.34667e-06	1.05731
ENSSSCG00000006463	PEAR1	64	137	1.27213	2.63604	0.00997817	1.05114
ENSSSCG00000011702	TM4SF1	121	241	26.3979	54.5855	0.00213671	1.04809
ENSSSCG00000001873	CSPG4	727	1612	9.44604	19.3924	2.02241e-09	1.03772
ENSSSCG00000002768	CENPT	119	246	7.19284	14.7554	0.000660334	1.03662
ENSSSCG00000007509	PMEPA1	412	883	10.2261	20.9762	1.30058e-07	1.0365
ENSSSCG00000003931	KIF2C	265	530	9.37568	19.2073	3.2493e-05	1.03466
ENSSSCG00000000265	ESPL1	385	808	7.13578	14.59	5.54439e-07	1.03183
ENSSSCG00000008677	TACC3	552	1226	14.7154	30.0597	4.68642e-09	1.0305
ENSSSCG00000005498	PAPPA	318	666	7.31411	14.9256	1.4817e-06	1.02904
ENSSSCG00000007586	FSCN1	843	1850	33.8336	68.9617	2.62521e-09	1.02734
ENSSSCG00000013772	ASF1B	163	333	13.666	27.7324	0.000162329	1.02098
ENSSSCG00000025567	LOC100625519	88	192	5.30777	10.7361	0.000734602	1.01628
ENSSSCG00000006472	CRABP2	477	979	68.1888	137.476	8.04374e-07	1.01157
ENSSSCG00000001510	LOC100154627	189	401	8.30854	16.7058	1.38553e-05	1.00769
ENSSSCG00000023796	IL18BP	104	209	10.9052	21.8393	0.0036591	1.00191
ENSSSCG00000002267	RGMA	74	165	2.18616	4.35991	0.00121727	0.99587
ENSSSCG00000011731	SMC4	859	1453	34.8022	69.2571	0.00341501	0.992783
ENSSSCG00000002648	CBFA2T3	88	191	2.45232	4.86757	0.000871326	0.989075
ENSSSCG00000007032	PLAT	245	491	10.1367	20.0664	4.28521e-05	0.985194
ENSSSCG00000017199	TRIM47	233	510	10.2396	20.1614	8.75262e-07	0.977436
ENSSSCG00000009865	TBX3	378	749	10.3177	20.3101	1.15265e-05	0.977076
ENSSSCG00000007493	STK6	336	641	25.1527	49.3349	0.000105164	0.971895
ENSSSCG00000008957	AMCF-II	3865	6809	518.182	1015.41	0.000497192	0.970532
ENSSSCG00000023522	TGM2	96	195	2.56803	5.01943	0.00410962	0.96687
ENSSSCG00000030363	LGI3	113	233	3.19759	6.24884	0.000983354	0.96659
ENSSSCG00000025206	RNF19B	287	585	13.5837	26.5435	9.24999e-06	0.966482
ENSSSCG00000011355	COL7A1	373	755	3.47088	6.75653	4.18774e-06	0.960966
ENSSSCG00000001952	NFKBIA	588	1119	37.5365	72.9347	2.3354e-05	0.958311
ENSSSCG00000022031	CHST2	130	268	8.93267	17.2884	0.00042929	0.952636
ENSSSCG00000029326	CCNB1	564	992	43.5743	83.7855	0.00103505	0.943223
ENSSSCG00000017473	TOP2A	906	1516	25.0838	48.1557	0.00523852	0.940951
ENSSSCG00000029264	PKMYT1	88	184	6.45828	12.274	0.00282875	0.926379
ENSSSCG00000022645	H2AFX	145	287	51.7107	97.8416	0.0010114	0.919985
ENSSSCG00000005935	AGO2	194	372	10.1776	19.2466	0.000786317	0.919206
ENSSSCG00000000693	NCAPD2	259	481	10.5011	19.8248	0.000839104	0.916766
ENSSSCG00000012307	CCNB3	195	353	11.066	20.861	0.00616092	0.914674
ENSSSCG00000029509	KIF22	519	986	24.3775	45.9522	3.43184e-05	0.914584
ENSSSCG00000027607	IER3	1450	2878	159.093	299.3	5.95673e-07	0.911722
ENSSSCG00000006917	LRRC8C	214	387	4.96318	9.32479	0.00455436	0.909802
ENSSSCG00000006474	NES	934	1774	17.1509	32.1925	1.13604e-05	0.90844
ENSSSCG00000009617	REEP4	193	376	15.4782	28.9986	0.00043682	0.905746
ENSSSCG00000000738	RHNO1	147	274	10.5876	19.7681	0.00724913	0.900799
ENSSSCG00000000837	CHST11	117	233	7.42865	13.8505	0.00257296	0.898756
ENSSSCG00000007268	E2F1	289	558	15.2428	28.3029	0.000108282	0.892822
ENSSSCG00000014450	TCOF1	753	1524	13.1989	24.3958	4.84029e-07	0.886215
ENSSSCG00000007366	MYBL2	1284	2420	55.1421	101.521	1.25558e-05	0.880552
ENSSSCG00000008123	ARID5A	107	210	4.68231	8.61021	0.0065053	0.878829
ENSSSCG00000002815	ADGRG1	246	479	11.153	20.502	0.000147238	0.878333
ENSSSCG00000010613	ITPRIP	173	331	10.971	20.1261	0.00143803	0.875373
ENSSSCG00000006475	IQGAP3	429	785	7.93144	14.4822	0.000323373	0.868633
ENSSSCG00000007554	ZFAND2A	369	725	30.5375	55.4215	1.90316e-05	0.859864
ENSSSCG00000007423	UBE2C	415	784	53.9444	97.765	8.30543e-05	0.857845
ENSSSCG00000003458	EFHD2	590	1137	23.8771	43.244	1.22159e-05	0.856872
ENSSSCG00000002950		227	439	6.77824	12.2367	0.000278581	0.85224
ENSSSCG00000007151	CDC25B	498	928	20.6696	37.3112	9.65683e-05	0.852098
ENSSSCG00000021220	CKB	407	755	60.8777	108.687	0.000202238	0.836194
ENSSSCG00000013066	INCENP	391	722	11.3661	20.2771	0.000277907	0.835114
ENSSSCG00000027855	SOCS1	242	475	38.194	67.993	0.000112543	0.83204
ENSSSCG00000022246	ICOSLG	179	345	6.42212	11.3806	0.000938071	0.82546
ENSSSCG00000014336	EGR1	245	455	10.2011	18.0627	0.00103104	0.824289
ENSSSCG00000028202	RANGAP1	270	499	28.1196	49.3823	0.000876703	0.812418
ENSSSCG00000001061	JARID2	225	408	5.82884	10.2128	0.00345628	0.809108
ENSSSCG00000007543	LOC100520368	140	274	5.43713	9.51272	0.00179917	0.807018
ENSSSCG00000003949	CDC20	203	372	4.08137	7.13315	0.00346072	0.805485
ENSSSCG00000015116	MCAM	95	210	8.49741	14.7456	0.000276811	0.795191
ENSSSCG00000025499	FXYD5	576	1028	75.9024	131.337	0.000522202	0.791056
ENSSSCG00000001595	DAAM2	387	670	11.9806	20.5237	0.00416442	0.776591
ENSSSCG00000023220	LOC102160559	299	559	9.70731	16.56	0.000381689	0.770561
ENSSSCG00000010017	SMTN	637	1140	17.8065	30.3685	0.000388307	0.770172
ENSSSCG00000002306	GALNT16	649	1147	17.691	30.0589	0.000668473	0.764777
ENSSSCG00000022823		277	498	19.5782	33.2486	0.00236748	0.764045
ENSSSCG00000030543	COTL1	553	929	274.466	464.061	0.0072276	0.757687
ENSSSCG00000005849	TUBB4B	1668	2931	95.1199	160.332	0.000441392	0.753243
ENSSSCG00000001703	NFKBIE	167	310	8.53732	14.3448	0.00483265	0.748676
ENSSSCG00000012277	TIMP1	2695	4502	945.389	1588.44	0.00559678	0.748631
ENSSSCG00000001392	TCF19	301	523	17.0618	28.5996	0.00667141	0.745225
ENSSSCG00000017379	ETV4	260	462	11.9116	19.9006	0.00447071	0.740445
ENSSSCG00000024771	TICAM1	331	603	16.6339	27.7067	0.000807351	0.736108
ENSSSCG00000014869	LRRC32	2414	4339	58.2592	97.0385	0.000142005	0.736071
ENSSSCG00000029230	ECM1	2324	4063	181.131	300.691	0.000587376	0.731248
ENSSSCG00000026116	FHOD1	475	814	22.3944	36.9374	0.00415009	0.721944
ENSSSCG00000028878	BCAR1	1536	2768	56.7856	92.9775	0.000124825	0.711357
ENSSSCG00000002651	CDT1	324	577	15.504	25.3148	0.00214548	0.707341
ENSSSCG00000026022	TUBB6	2070	3414	119.016	193.275	0.0089999	0.6995
ENSSSCG00000002527	ANKRD9	171	313	16.9427	27.4306	0.00701263	0.695122
ENSSSCG00000008682	WHSC1	708	1193	14.4163	23.2636	0.00476581	0.690373
ENSSSCG00000003846	GLIS1	295	531	12.7789	20.5996	0.00185764	0.688853
ENSSSCG00000003216	POLD1	726	1242	19.5814	31.1567	0.00244117	0.670059
ENSSSCG00000006651	ADAMTSL4	630	1070	17.2937	27.327	0.00391035	0.660081
ENSSSCG00000010772	ADAM8	352	630	55.178	86.8058	0.00139891	0.653698
ENSSSCG00000013263	CREB3L1	4242	7216	161.111	251.44	0.00309331	0.642159
ENSSSCG00000016653	DNAJB9	884	506	98.2484	63.8267	0.00167544	-0.622274
ENSSSCG00000006995	ASAH1	943	540	72.4919	46.1422	0.00151987	-0.651733
ENSSSCG00000015801	TLR3	636	351	47.4435	29.857	0.000849787	-0.668141
ENSSSCG00000012792	RENBP	250	133	24.5035	15.1969	0.00861685	-0.689211
ENSSSCG00000016925	PLK2	812	470	40.03	24.8157	0.00304838	-0.689828
ENSSSCG00000011474	PXK	1732	1009	81.3012	50.3562	0.00159435	-0.691107
ENSSSCG00000012633	IL13RA1	1206	666	56.666	34.292	0.000208551	-0.724611
ENSSSCG00000006126	DECR1	610	316	56.0334	33.9045	7.73362e-05	-0.72481
ENSSSCG00000016522	PTN	1008	568	93.8588	56.3351	0.000689665	-0.736458
ENSSSCG00000029531	LOC100625064	280	148	28.3393	16.9825	0.00433241	-0.738755
ENSSSCG00000026153	ACAT1	890	477	84.8049	50.7733	0.000101251	-0.740078
ENSSSCG00000025630		1581	885	77.5293	46.3751	0.00027388	-0.741391
ENSSSCG00000024418	RHOU	388	209	17.8116	10.6427	0.00193051	-0.742953
ENSSSCG00000007737	TPST1	431	241	43.2986	25.8618	0.00451041	-0.743498
ENSSSCG00000005055	LGALS3	1517	904	239.612	141.847	0.00464123	-0.756365
ENSSSCG00000013181	SERPING1	2390	1427	194.963	114.653	0.0043169	-0.765926
ENSSSCG00000010928	KDM5B	333	182	11.5665	6.78059	0.00556583	-0.770468
ENSSSCG00000016034	COL3A1	30229	17052	719.814	411.254	0.00133908	-0.807594
ENSSSCG00000011496	ADAMTS9	289	154	5.51688	3.10651	0.0047483	-0.828568
ENSSSCG00000011727	PTX3	1032	556	71.3407	40.1064	9.03677e-05	-0.830893
ENSSSCG00000008529	YPEL5	289	145	24.4315	13.6564	0.000788167	-0.839165
ENSSSCG00000015175	VWA5A	546	270	18.4334	10.1258	1.79249e-05	-0.864286
ENSSSCG00000027055	NUAK1	375	206	8.13123	4.45375	0.00414367	-0.868432
ENSSSCG00000005087	SIX1	1095	581	60.1852	32.9405	3.89706e-05	-0.869546
ENSSSCG00000011928	CCDC80	1484	787	40.4615	22.0591	2.13419e-05	-0.875176
ENSSSCG00000024591	ETV1	2494	1175	78.6477	42.269	1.17554e-08	-0.895805
ENSSSCG00000010219	ARID5B	2055	1049	40.9976	22.0065	1.77022e-06	-0.89761
ENSSSCG00000001422	C2	1402	741	80.1982	42.986	1.97914e-05	-0.899703
ENSSSCG00000014131	SSBP2	262	135	31.4348	16.7224	0.00287177	-0.910581
ENSSSCG00000030621		302	152	35.2734	18.75	0.000687919	-0.91169
ENSSSCG00000013404	ZBED5	167	77	36.9843	19.6163	0.00216344	-0.91486
ENSSSCG00000003201	ATF5	3550	2056	239.79	126.606	0.00105883	-0.921426
ENSSSCG00000015025	CRYAB	413	209	32.0334	16.7944	0.0001685	-0.931597
ENSSSCG00000030484	AHR	166	74	7.71199	3.99689	0.00100951	-0.948224
ENSSSCG00000009937	ACACB	574	297	7.50715	3.8874	9.31625e-05	-0.949469
ENSSSCG00000016111	FZD7	418	232	29.6781	15.2826	0.00391829	-0.957509
ENSSSCG00000016613	AASS	139	65	7.15086	3.67734	0.00933732	-0.959478
ENSSSCG00000014136	VCAN	5307	2550	148.897	76.0343	2.39794e-08	-0.969592
ENSSSCG00000027643	DIO2	252	117	26.1478	13.35	0.00016679	-0.96985
ENSSSCG00000026298		2196	1187	191.804	95.5789	3.60766e-05	-1.00487
ENSSSCG00000004207	LAMA2	390	177	16.9582	8.4119	3.83354e-06	-1.01148
ENSSSCG00000009216	SPP1	695	330	61.1374	30.281	9.29511e-07	-1.01364
ENSSSCG00000011848	TFRC	5324	2294	372.584	184.489	1.19589e-11	-1.01403
ENSSSCG00000016857	DAB2	834	392	50.2367	24.8477	2.43589e-07	-1.01563
ENSSSCG00000024396	NOVA1	920	400	55.6013	27.2155	2.36444e-09	-1.03069
ENSSSCG00000014894		365	181	5.04753	2.45841	0.000153296	-1.03785
ENSSSCG00000002866	CEBPA	599	332	56.4494	27.4544	0.00118912	-1.03992
ENSSSCG00000011689	PLOD2	673	276	66.2435	31.8852	7.09647e-10	-1.05489
ENSSSCG00000004136	AIG1	162	69	29.9634	14.2714	0.000402497	-1.07007
ENSSSCG00000026570	SNAI2	226	110	41.9559	19.6708	0.00130217	-1.09282
ENSSSCG00000006197	SULF1	262	117	10.4103	4.86851	3.74681e-05	-1.09646
ENSSSCG00000006115	RUNX1T1	182	83	10.4114	4.86331	0.000930965	-1.09816
ENSSSCG00000009668	CLU	6751	2836	879.292	401.917	1.58451e-12	-1.12944
ENSSSCG00000011686		135	54	30.7383	14.044	0.000415701	-1.13008
ENSSSCG00000001910	ISLR	742	353	48.1089	21.8068	7.50673e-07	-1.14153
ENSSSCG00000030143	OGN	82	30	7.68742	3.43614	0.00492015	-1.16172
ENSSSCG00000008072	ASPN	272	102	24.2685	10.7557	6.70906e-08	-1.17398
ENSSSCG00000030325	C1QTNF6	2450	1127	102.599	45.043	2.64871e-09	-1.18764
ENSSSCG00000007115	THBD	221	98	7.50104	3.18906	0.000107954	-1.23393
ENSSSCG00000001783	CEMIP	144	62	15.6093	6.61279	0.00126769	-1.23907
ENSSSCG00000014980	C11orf70	319	117	65.516	27.7393	4.81206e-09	-1.23992
ENSSSCG00000005400	GRIN3A	270	97	18.4339	7.7885	1.52585e-08	-1.24294
ENSSSCG00000015404		108	41	34.2194	14.3698	0.000954177	-1.25177
ENSSSCG00000016459	EPHA1	308	135	10.3921	4.34071	5.83629e-06	-1.25949
ENSSSCG00000009086	FGF2	109	42	148.394	61.3997	0.00116902	-1.27313
ENSSSCG00000028873	LOC100627123	2439	895	119.425	48.062	2.22045e-16	-1.31314
ENSSSCG00000004803	ACTC1	136	54	14.1503	5.59858	0.000331772	-1.33769
ENSSSCG00000013408	ADM	888	357	74.4606	29.3475	3.23567e-11	-1.34324
ENSSSCG00000028549		489	174	48.3165	18.8172	8.78775e-12	-1.36046
ENSSSCG00000027124	TMEM119	1049	423	60.8732	23.4326	1.33135e-11	-1.37729
ENSSSCG00000024404	SNAI2	164	62	26.015	9.9681	1.80246e-05	-1.38395
ENSSSCG00000000915	DCN	2175	757	265.845	100.964	0	-1.39674
ENSSSCG00000022733		524	185	29.6713	11.0317	2.65699e-12	-1.42741
ENSSSCG00000004012	THBS2	4932	1893	84.7468	31.4422	1.55431e-15	-1.43046
ENSSSCG00000026495	SAMD11	315	121	29.7209	10.9607	3.444e-08	-1.43914
ENSSSCG00000007170	CPXM1	814	308	34.1978	12.4147	1.69453e-12	-1.46185
ENSSSCG00000006572	NPR1	228	82	7.17919	2.60261	1.16649e-07	-1.46387
ENSSSCG00000023949	PIM3	195	79	17.3873	6.26525	2.2635e-05	-1.47258
ENSSSCG00000023611	TNXB	247	97	3.21786	1.15679	9.16917e-07	-1.47598
ENSSSCG00000009565	GAS6	642	247	35.4148	12.724	3.3672e-11	-1.4768
ENSSSCG00000002737	CHST4	154	55	15.1164	5.36589	8.0886e-06	-1.49422
ENSSSCG00000021208	SEPP1	224	67	22.8044	8.06264	2.93267e-10	-1.5
ENSSSCG00000017904	ENO3	809	281	64.9517	22.826	9.4369e-15	-1.50869
ENSSSCG00000009648	NEFM	81	27	2.19937	0.770906	0.00132021	-1.51249
ENSSSCG00000005455	SVEP1	427	141	5.49338	1.90797	1.15752e-12	-1.52564
ENSSSCG00000005094	TMEM30B	96	36	12.0454	4.15009	0.00205273	-1.53726
ENSSSCG00000009111	SYNPO2	304	95	8.60002	2.85014	1.32039e-11	-1.59332
ENSSSCG00000026721	RNASE4	151	48	41.8723	13.8451	5.2674e-07	-1.59662
ENSSSCG00000008468	PKDCC	2016	698	108.647	35.8315	0	-1.60035
ENSSSCG00000003333	FAM132A	355	126	43.5257	14.2255	3.47233e-10	-1.61339
ENSSSCG00000028244	ECM2	371	100	50.7613	16.3854	5.55112e-16	-1.63132
ENSSSCG00000025270	CHRD	268	92	8.15756	2.624	3.11191e-09	-1.63638
ENSSSCG00000021880	MXRA8	679	229	26.6704	8.32226	1.03251e-14	-1.68019
ENSSSCG00000012126	GPM6B	128	37	9.09596	2.82652	4.86053e-07	-1.68622
ENSSSCG00000016841	SLC1A3	88	26	7.22298	2.23927	8.23116e-05	-1.68955
ENSSSCG00000007463	PTGIS	894	256	21.5448	6.20881	0	-1.79495
ENSSSCG00000010055	GGT5	75	23	3.67979	1.05758	0.000785494	-1.79883
ENSSSCG00000010698	FGFR2	108	34	11.1511	3.20119	2.55315e-05	-1.8005
ENSSSCG00000005638	LCN2	3486	989	540.557	151.521	0	-1.83493
ENSSSCG00000002032	SLC7A8	60	18	2.63109	0.706112	0.00461908	-1.89772
ENSSSCG00000028996	ALDH1A1	751	182	219.059	58.4821	0	-1.90525
ENSSSCG00000000916	LUM	248	57	15.5171	4.07796	3.10862e-15	-1.92793
ENSSSCG00000028711	CASP1	137	31	17.3714	4.37981	4.99722e-10	-1.98778
ENSSSCG00000017383	AOC3	52	13	2.75952	0.681391	0.00227796	-2.01783
ENSSSCG00000016381	SNED1	178	47	3.71061	0.902448	2.55337e-10	-2.03981
ENSSSCG00000010414	CXCL12	716	149	89.1351	20.4639	0	-2.12291
ENSSSCG00000001787	IL16	72	21	2.20487	0.504422	0.000576282	-2.12807
ENSSSCG00000001427	C4A	897	201	18.5128	4.0921	0	-2.17761
ENSSSCG00000027724		45	7	4.91023	0.98545	0.000141702	-2.31685
ENSSSCG00000004452	PRSS35	67	12	7.31674	1.40532	2.13465e-06	-2.38031
ENSSSCG00000024122	CHST8	63	12	6.57782	1.228	1.1232e-05	-2.42129
ENSSSCG00000027367	FGFR2	32	5	13.0694	2.41034	0.00661489	-2.43891
ENSSSCG00000007379	WISP2	98	19	7.64014	1.40156	1.09262e-08	-2.44652
ENSSSCG00000008397	EFEMP1	266	40	15.4325	2.60788	0	-2.56501
ENSSSCG00000000857	IGF1	73	10	13.7596	1.45126	1.69173e-08	-3.24502
ENSSSCG00000003439	DHRS3	138	11	13.7088	1.1046	0	-3.63351

## Sheet: Table S4
GO ID	GO Term	Description	GeneRatio (148)	BgRatio (10926)	p-value	fdr	geneID
GO:0031012	CC	extracellular matrix	23	528	6.18972e-07	5.40569e-05	ADAM8;TACC3;COL5A3;TGFB1;F3;TGFB3;LRIG1;ITGB3;IGSF8;FAM83G;JAG1;ECM1;TIMP1;PEAR1;RGMA;ADAMTS14;MMP1;CCBE1;COL7A1;CDT1;ADAMTS4;TICAM1;ADAMTSL4
GO:0005615	CC	extracellular space	20	504	1.4485e-05	0.000632511	LGI3;FJX1;CCL5;ADAMTS4;LIPG;CXCL8;IL1A;HBEGF;F3;PLAT;INHBA;ECM1;TNFSF9;VEGFC;CXCL10;PDGFA;TGFB1;CXCL2;TGFB3;LIF
GO:0005694	CC	chromosome	20	543	4.21546e-05	0.00157779	CCNB1;GSG2;TNIP1;KIF22;AURKB;CENPT;ASF1B;KIF18B;KIF2C;NCAPD2;WHSC1;H2AFX;INCENP;UBE2C;TOP2A;RHNO1;PLK1;SMC4;HMGA1;CENPF
GO:0005819	CC	spindle	11	247	0.000527703	0.00965614	CCNB1;FAM83D;AURKB;KIF22;CDC20;PLK1;GSG2;INCENP;KIF2C;CENPF;CDC25B
GO:0005126	MF	cytokine receptor binding	11	170	2.53365e-05	0.00324307	TNFSF9;CXCL8;TGFB1;IL1A;TGFB3;CCL5;ECM1;CXCL2;CXCL10;LIF;VEGFC
GO:0008083	MF	growth factor activity	8	97	6.1302e-05	0.00588499	TGFB3;VEGFC;PDGFA;INHBA;CXCL2;HBEGF;LIF;TGFB1
GO:0019900	MF	kinase binding	14	316	0.000133731	0.00958356	CDC25B;HCLS1;TNFAIP3;SPRY2;PLK1;CCNA2;TOP2A;SOCS2;SOCS1;TICAM1;CCNB1;TNIP1;CCNB3;AURKB
GO:0019899	MF	enzyme binding	27	917	0.000149743	0.00958356	CDC25B;EGR1;TNFAIP3;TOP2A;ADAMTS4;TGFB1;HMGA1;NFKBIA;CDC20;SOCS1;SPRY2;F3;ECM1;H2AFX;AURKB;PLK1;COTL1;TNIP1;ADAMTSL4;HCLS1;DAAM2;CCNA2;SOCS2;CCNB3;TICAM1;IQGAP3;CCNB1
GO:0022402	BP	cell cycle process	34	723	1.43376e-10	3.88263e-07	H2AFX;CCNF;IQGAP3;CCNB3;CENPT;CCNA2;KIF2C;RHNO1;SMC4;GSG2;TGFB1;TUBB4B;TACC3;CDT1;CENPF;CIT;TGFB3;TUBB6;NCAPD2;MYBL2;CDC20;ESPL1;CXCL8;FAM83D;PKMYT1;INCENP;E2F1;CCNB1;TNIP1;AURKB;INHBA;CDC25B;IER3;PLK1
GO:0051302	BP	regulation of cell division	14	144	1.00963e-08	4.3384e-06	CCNB1;CIT;PLK1;KIF18B;LIF;VEGFC;AURKB;CDC20;CDC25B;TGFB1;IL1A;UBE2C;PDGFA;TGFB3
GO:0042127	BP	regulation of cell proliferation	36	982	3.15788e-08	6.57811e-06	HMGA1;TBX3;PNP;E2F1;HES4;TNFAIP3;TGFB3;EGR1;CCL5;ETV4;INHBA;TGFB1;SPRY2;JARID2;LIF;VEGFC;ECM1;CHST11;CXCL10;HCLS1;HBEGF;LRRC32;TNFSF9;NFKBIA;F3;TMEM158;ADGRG1;FLT1;TICAM1;IL1A;PDGFA;ITGB3;CBFA2T3;IQGAP3;SHAS2;EFHD2
GO:0007059	BP	chromosome segregation	12	113	4.46137e-08	8.05427e-06	CCNB1;CENPF;TOP2A;ESPL1;PLK1;GSG2;INCENP;NCAPD2;SMC4;CIT;CENPT;KIF2C
GO:0048285	BP	organelle fission	16	241	1.95308e-07	2.48415e-05	CCNA2;PLK1;SMC4;CCNF;GSG2;CIT;PKMYT1;CCNB1;CDC25B;NCAPD2;CDC20;FAM83D;ESPL1;KIF2C;AURKB;CENPT
GO:0060326	BP	cell chemotaxis	11	106	2.11196e-07	2.4866e-05	FLT1;CCL5;PDE4B;TGFB1;CORO1A;CXCL2;VEGFC;EFHD2;CXCL8;PDGFA;TGFB3
GO:0040017	BP	positive regulation of locomotion	16	263	6.37285e-07	6.39174e-05	HBEGF;TGFB1;ETS1;CREB3L1;ADAM8;TGFB3;CXCL10;PDGFA;VEGFC;SHAS2;ITGB3;EFHD2;CXCL2;CXCL8;FLT1;CCL5
GO:0051240	BP	positive regulation of multicellular organismal process	32	970	2.30159e-06	0.00018887	LIF;TICAM1;LRIG1;INHBA;PLK1;TNFAIP3;TGFB3;F3;TGFB1;LIPG;SEMA7A;IQGAP3;ETS1;HEYL;ECM1;IL1A;MYBL2;LRRC32;ADAM8;CDC20;CCL5;HCLS1;LRRC8C;PNP;HBEGF;JAG1;TMEM158;PDGFA;FLT1;EGR1;HEY1;VEGFC
GO:0050920	BP	regulation of chemotaxis	9	90	3.82346e-06	0.000275867	CCL5;CXCL10;PDGFA;TGFB1;VEGFC;CREB3L1;EFHD2;CXCL8;CXCL2
GO:0048520	BP	positive regulation of behavior	8	75	8.29208e-06	0.000492451	CXCL8;CXCL10;TGFB1;CREB3L1;CXCL2;CCL5;VEGFC;PDGFA

## Sheet: Table S5
GO ID	GO Term	Description	GeneRatio (84)	BgRatio (10671)	p-value	FDR	gene ID
GO:0006790	BP	sulfur compound metabolic process	10	134	8.72855e-08	0.00019229	GGT5;CHST4;ACACB;AASS;SULF1;IGF1;ASPN;TPST1;CHST8;DCN
GO:1903827	BP	regulation of cellular protein localization	11	226	1.43969e-06	0.00158582	RHOU;FZD7;SNAI2;GAS6;TLR3;TMEM30B;GPM6B;IGF1;DAB2;EPHA1;PKDCC
GO:0032880	BP	regulation of protein localization	14	447	9.00794e-06	0.00432054	FAM132A;SNAI2;DAB2;GPM6B;CASP1;PKDCC;FZD7;EPHA1;RHOU;TLR3;SIX1;IGF1;GAS6;TMEM30B
GO:0030198	BP	extracellular matrix organization	8	133	9.27937e-06	0.00432054	COL3A1;LUM;SULF1;LGALS3;GPM6B;PLOD2;GAS6;CCDC80
GO:0043062	BP	extracellular structure organization	8	134	9.80603e-06	0.00432054	LGALS3;PLOD2;GAS6;GPM6B;COL3A1;SULF1;CCDC80;LUM
GO:0048585	BP	negative regulation of response to stimulus	19	821	1.53454e-05	0.00558662	THBD;COL3A1;CHRD;FZD7;GRIN3A;C1QTNF6;GAS6;PTGIS;CLU;SNAI2;ADM;SULF1;SERPING1;FAM132A;EPHA1;ASPN;NUAK1;IGF1;DAB2
GO:0006029	BP	proteoglycan metabolic process	5	42	1.81376e-05	0.00558662	DCN;IGF1;CHST8;SULF1;ASPN
GO:0010810	BP	regulation of cell-substrate adhesion	7	108	2.13567e-05	0.00558662	DAB2;FZD7;CCDC80;GPM6B;EPHA1;RHOU;SPP1
GO:0010811	BP	positive regulation of cell-substrate adhesion	6	76	2.79655e-05	0.0061608	RHOU;FZD7;DAB2;CCDC80;SPP1;EPHA1
GO:0033157	BP	regulation of intracellular protein transport	8	159	3.40121e-05	0.0068117	FZD7;SNAI2;TMEM30B;GAS6;TLR3;IGF1;DAB2;PKDCC
GO:0005539	MF	glycosaminoglycan binding	7	106	2.3619e-05	0.00864457	VCAN;CHRD;DCN;ASPN;CCDC80;THBS2;PTN
GO:0005615	CC	extracellular space	22	504	1.67154e-11	3.89469e-09	CHRD;GAS6;VCAN;C4A;AOC3;SULF1;PTGIS;CLU;FZD7;SPP1;C1QTNF6;FAM132A;SERPING1;OGN;CXCL12;ADAMTS9;WISP2;EFEMP1;IGF1;CPXM1;DCN;LUM
GO:0005576	CC	extracellular region	44	2253	1.06735e-10	1.24346e-08	CPXM1;FAM132A;C4A;CHRD;RNASE4;ACTC1;CLU;PTN;CCDC80;C2;SLC1A3;EFEMP1;PRSS35;ASPN;PTGIS;SPP1;ISLR;AOC3;ACACB;FZD7;MXRA8;ADAMTS9;PTX3;C1QTNF6;IGF1;LUM;ATF5;SNED1;OGN;TFRC;ENO3;VCAN;CASP1;SERPING1;SVEP1;COL3A1;WISP2;ADM;CXCL12;DCN;GAS6;SULF1;THBS2;LGALS3
GO:0031012	CC	extracellular matrix	18	528	7.51471e-08	4.30782e-06	CLU;ADAMTS9;SLC1A3;COL3A1;VCAN;FAM132A;CCDC80;THBS2;LGALS3;ATF5;ASPN;SNED1;EFEMP1;FZD7;OGN;DCN;C1QTNF6;LUM

## Sheet: Table S6
KEGG_A_class	KEGG_B_class	Pathway	out (79)	All (6653)	P-value	Q-value	Pathway ID	Genes	K_IDs
Cellular Processes	Cell growth and death	Cell cycle	12	138	6.13e-08	9.14e-06	ko04110	ENSSSCG00000002385;ENSSSCG00000026296;ENSSSCG00000003017;ENSSSCG00000029264;ENSSSCG00000026748;ENSSSCG00000009094;ENSSSCG00000007268;ENSSSCG00000029326;ENSSSCG00000012307;ENSSSCG00000007151;ENSSSCG00000003949;ENSSSCG00000022823	K13377+K13375+K13375+K06633+K06631+K06627+K17454+K05868+K05868+K05866+K03363+K02209
Human Diseases	Immune diseases	Rheumatoid arthritis	9	82	4.29e-07	3.2e-05	ko05323	ENSSSCG00000002385;ENSSSCG00000026296;ENSSSCG00000003017;ENSSSCG00000017705;ENSSSCG00000008953;ENSSSCG00000008957;ENSSSCG00000009320;ENSSSCG00000008090;ENSSSCG00000014985	K13377+K13375+K13375+K12499+K10030+K05506+K05096+K04383+K01388
Environmental Information Processing	Signaling molecules and interaction	Cytokine-cytokine receptor interaction	14	256	1.45e-06	7.19e-05	ko04060	ENSSSCG00000002385;ENSSSCG00000026296;ENSSSCG00000003017;ENSSSCG00000008977;ENSSSCG00000017705;ENSSSCG00000008953;ENSSSCG00000008957;ENSSSCG00000008959;ENSSSCG00000015770;ENSSSCG00000009996;ENSSSCG00000009320;ENSSSCG00000021865;ENSSSCG00000008090;ENSSSCG00000007541	K13377+K13375+K13375+K12671+K12499+K10030+K05506+K05505+K05449+K05419+K05096+K04667+K04383+K04359
Human Diseases	Infectious diseases	HTLV-I infection	12	250	3.31e-05	0.00123	ko05166	ENSSSCG00000002385;ENSSSCG00000026296;ENSSSCG00000003017;ENSSSCG00000007366;ENSSSCG00000014336;ENSSSCG00000007268;ENSSSCG00000001952;ENSSSCG00000012967;ENSSSCG00000007541;ENSSSCG00000003949;ENSSSCG00000015235;ENSSSCG00000003216	K13377+K13375+K13375+K09421+K09203+K17454+K04734+K04502+K04359+K03363+K02678+K02327
Human Diseases	Endocrine and metabolic diseases	AGE-RAGE signaling pathway in diabetic complications	8	121	8.42e-05	0.00251	ko04933	ENSSSCG00000002385;ENSSSCG00000026296;ENSSSCG00000003017;ENSSSCG00000008953;ENSSSCG00000014336;ENSSSCG00000015770;ENSSSCG00000008090;ENSSSCG00000022447	K13377+K13375+K13375+K10030+K09203+K05449+K04383+K03901
Human Diseases	Infectious diseases	Hepatitis B	9	171	0.000174067	0.00432	ko05161	ENSSSCG00000002385;ENSSSCG00000026296;ENSSSCG00000003017;ENSSSCG00000008953;ENSSSCG00000013263;ENSSSCG00000009094;ENSSSCG00000007268;ENSSSCG00000024771;ENSSSCG00000001952	K13377+K13375+K13375+K10030+K09048+K06627+K17454+K05842+K04734
Human Diseases	Infectious diseases	Chagas disease (American trypanosomiasis)	7	115	0.000398561	0.00848	ko05142	ENSSSCG00000002385;ENSSSCG00000026296;ENSSSCG00000003017;ENSSSCG00000017705;ENSSSCG00000008953;ENSSSCG00000024771;ENSSSCG00000001952	K13377+K13375+K13375+K12499+K10030+K05842+K04734
Environmental Information Processing	Signal transduction	TNF signaling pathway	7	118	0.000466143	0.00868	ko04668	ENSSSCG00000008977;ENSSSCG00000017705;ENSSSCG00000004154;ENSSSCG00000013263;ENSSSCG00000008959;ENSSSCG00000009996;ENSSSCG00000001952	K12671+K12499+K11859+K09048+K05505+K05419+K04734
Human Diseases	Infectious diseases	Malaria	5	58	0.000582174	0.00964	ko05144	ENSSSCG00000002385;ENSSSCG00000026296;ENSSSCG00000003017;ENSSSCG00000008953;ENSSSCG00000008601	K13377+K13375+K13375+K10030+K06257
Organismal Systems	Development	Osteoclast differentiation	7	131	0.000872299	0.013	ko04380	ENSSSCG00000026296;ENSSSCG00000003017;ENSSSCG00000017306;ENSSSCG00000001952;ENSSSCG00000027855;ENSSSCG00000012967;ENSSSCG00000008090	K13375+K13375+K06493+K04734+K04694+K04502+K04383
Organismal Systems	Endocrine system	Progesterone-mediated oocyte maturation	6	101	0.00119775	0.015	ko04914	ENSSSCG00000029264;ENSSSCG00000026748;ENSSSCG00000009094;ENSSSCG00000029326;ENSSSCG00000012307;ENSSSCG00000007151	K06633+K06631+K06627+K05868+K05868+K05866
Human Diseases	Infectious diseases	Leishmaniasis	5	68	0.0012076	0.015	ko05140	ENSSSCG00000002385;ENSSSCG00000026296;ENSSSCG00000003017;ENSSSCG00000001952;ENSSSCG00000008090	K13377+K13375+K13375+K04734+K04383
Human Diseases	Cancers	Bladder cancer	4	47	0.00223013	0.0256	ko05219	ENSSSCG00000008953;ENSSSCG00000014362;ENSSSCG00000007268;ENSSSCG00000014985	K10030+K08523+K17454+K01388
Human Diseases	Cancers	Chronic myeloid leukemia	5	80	0.00249339	0.0265	ko05220	ENSSSCG00000002385;ENSSSCG00000026296;ENSSSCG00000003017;ENSSSCG00000007268;ENSSSCG00000001952	K13377+K13375+K13375+K17454+K04734
Organismal Systems	Immune system	NOD-like receptor signaling pathway	4	52	0.00323675	0.0322	ko04621	ENSSSCG00000017705;ENSSSCG00000004154;ENSSSCG00000008953;ENSSSCG00000001952	K12499+K11859+K10030+K04734
Organismal Systems	Immune system	Chemokine signaling pathway	7	183	0.00580326	0.054	ko04062	ENSSSCG00000008977;ENSSSCG00000017705;ENSSSCG00000008953;ENSSSCG00000028878;ENSSSCG00000008957;ENSSSCG00000008959;ENSSSCG00000001952	K12671+K12499+K10030+K05726+K05506+K05505+K04734
Environmental Information Processing	Signal transduction	FoxO signaling pathway	6	144	0.00704413	0.058	ko04068	ENSSSCG00000002385;ENSSSCG00000026296;ENSSSCG00000003017;ENSSSCG00000026748;ENSSSCG00000029326;ENSSSCG00000012307	K13377+K13375+K13375+K06631+K05868+K05868
Organismal Systems	Immune system	Toll-like receptor signaling pathway	5	102	0.00705834	0.058	ko04620	ENSSSCG00000008977;ENSSSCG00000017705;ENSSSCG00000008953;ENSSSCG00000024771;ENSSSCG00000001952	K12671+K12499+K10030+K05842+K04734
Human Diseases	Neurodegenerative diseases	Prion diseases	3	34	0.0074007	0.058	ko05020	ENSSSCG00000017705;ENSSSCG00000014336;ENSSSCG00000008090	K12499+K09203+K04383
Human Diseases	Immune diseases	Inflammatiory bowel disease (IBD)	4	67	0.00801579	0.0589	ko05321	ENSSSCG00000002385;ENSSSCG00000026296;ENSSSCG00000003017;ENSSSCG00000008090	K13377+K13375+K13375+K04383
Human Diseases	Cancers	MicroRNAs in cancer	6	151	0.00881713	0.0589	ko05206	ENSSSCG00000007268;ENSSSCG00000017306;ENSSSCG00000007151;ENSSSCG00000009482;ENSSSCG00000027855;ENSSSCG00000007541	K17454+K06493+K05866+K17383+K04694+K04359
Human Diseases	Infectious diseases	Pertussis	4	69	0.00888139	0.0589	ko05133	ENSSSCG00000008953;ENSSSCG00000024771;ENSSSCG00000008957;ENSSSCG00000008090	K10030+K05842+K05506+K04383
Human Diseases	Infectious diseases	Influenza A	6	152	0.00909435	0.0589	ko05164	ENSSSCG00000008977;ENSSSCG00000017705;ENSSSCG00000008953;ENSSSCG00000024771;ENSSSCG00000001952;ENSSSCG00000008090	K12671+K12499+K10030+K05842+K04734+K04383
Human Diseases	Cancers	Transcriptional misregulation in cancers	6	154	0.00966752	0.06	ko05202	ENSSSCG00000008682;ENSSSCG00000008953;ENSSSCG00000017379;ENSSSCG00000009320;ENSSSCG00000007541;ENSSSCG00000007032	K11424+K10030+K15592+K05096+K04359+K01343
Human Diseases	Cancers	Pancreatic cancer	4	76	0.0123856	0.0732	ko05212	ENSSSCG00000002385;ENSSSCG00000026296;ENSSSCG00000003017;ENSSSCG00000007268	K13377+K13375+K13375+K17454
Human Diseases	Infectious diseases	Toxoplasmosis	5	118	0.012808	0.0732	ko05145	ENSSSCG00000002385;ENSSSCG00000026296;ENSSSCG00000003017;ENSSSCG00000001952;ENSSSCG00000027855	K13377+K13375+K13375+K04734+K04694
Organismal Systems	Immune system	Intestinal immune network for IgA production	3	42	0.0132682	0.0732	ko04672	ENSSSCG00000026296;ENSSSCG00000003017;ENSSSCG00000022246	K13375+K13375+K06710
Environmental Information Processing	Signal transduction	TGF-beta signaling pathway	4	80	0.014736	0.0784	ko04350	ENSSSCG00000002385;ENSSSCG00000026296;ENSSSCG00000003017;ENSSSCG00000021865	K13377+K13375+K13375+K04667
Environmental Information Processing	Signal transduction	NF-kappa B signaling pathway	4	91	0.0225926	0.116	ko04064	ENSSSCG00000004154;ENSSSCG00000008953;ENSSSCG00000024771;ENSSSCG00000001952	K11859+K10030+K05842+K04734
Human Diseases	Cardiovascular diseases	Hypertrophic cardiomyopathy (HCM)	4	97	0.0277791	0.138	ko05410	ENSSSCG00000002385;ENSSSCG00000026296;ENSSSCG00000003017;ENSSSCG00000017306	K13377+K13375+K13375+K06493
Human Diseases	Cancers	Prostate cancer	4	99	0.0296535	0.142	ko05215	ENSSSCG00000013263;ENSSSCG00000007268;ENSSSCG00000001952;ENSSSCG00000007541	K09048+K17454+K04734+K04359
Human Diseases	Cardiovascular diseases	Dilated cardiomyopathy (DCM)	4	100	0.0306183	0.142	ko05414	ENSSSCG00000002385;ENSSSCG00000026296;ENSSSCG00000003017;ENSSSCG00000017306	K13377+K13375+K13375+K06493
Human Diseases	Cancers	Pathways in cancer	10	434	0.0317047	0.142	ko05200	ENSSSCG00000002385;ENSSSCG00000026296;ENSSSCG00000003017;ENSSSCG00000008953;ENSSSCG00000007268;ENSSSCG00000015770;ENSSSCG00000001952;ENSSSCG00000007541;ENSSSCG00000002501;ENSSSCG00000014985	K13377+K13375+K13375+K10030+K17454+K05449+K04734+K04359+K03915+K01388
Human Diseases	Cancers	Proteoglycans in cancer	6	202	0.0322982	0.142	ko05205	ENSSSCG00000026296;ENSSSCG00000003017;ENSSSCG00000014362;ENSSSCG00000017306;ENSSSCG00000008601;ENSSSCG00000011884	K13375+K13375+K08523+K06493+K06257+K06106
Organismal Systems	Immune system	Cytosolic DNA-sensing pathway	3	60	0.0339962	0.145	ko04623	ENSSSCG00000008977;ENSSSCG00000017705;ENSSSCG00000001952	K12671+K12499+K04734
Human Diseases	Infectious diseases	Legionellosis	3	64	0.0400308	0.161	ko05134	ENSSSCG00000008953;ENSSSCG00000008959;ENSSSCG00000001952	K10030+K05505+K04734
Human Diseases	Cancers	Colorectal cancer	3	64	0.0400308	0.161	ko05210	ENSSSCG00000002385;ENSSSCG00000026296;ENSSSCG00000003017	K13377+K13375+K13375
Environmental Information Processing	Signal transduction	Rap1 signaling pathway	6	217	0.0434505	0.161	ko04015	ENSSSCG00000017306;ENSSSCG00000028878;ENSSSCG00000015770;ENSSSCG00000009320;ENSSSCG00000007541;ENSSSCG00000021400	K06493+K05726+K05449+K05096+K04359+K02582
Cellular Processes	Cellular commiunity	Gap junction	4	113	0.0448521	0.161	ko04540	ENSSSCG00000008870;ENSSSCG00000005849;ENSSSCG00000026022;ENSSSCG00000007541	K12319+K07375+K07375+K04359
Human Diseases	Cancers	Renal cell carcinoma	3	67	0.0448898	0.161	ko05211	ENSSSCG00000002385;ENSSSCG00000026296;ENSSSCG00000003017	K13377+K13375+K13375
Human Diseases	Infectious diseases	Tuberculosis	5	165	0.0457997	0.161	ko05152	ENSSSCG00000029691;ENSSSCG00000002385;ENSSSCG00000026296;ENSSSCG00000003017;ENSSSCG00000008090	K13882+K13377+K13375+K13375+K04383
Environmental Information Processing	Signal transduction	Hippo signaling pathway	4	114	0.0460778	0.161	ko04390	ENSSSCG00000002385;ENSSSCG00000026296;ENSSSCG00000003017;ENSSSCG00000008963	K13377+K13375+K13375+K09782
Organismal Systems	Immune system	RIG-I-like receptor signaling pathway	3	68	0.046572	0.161	ko04622	ENSSSCG00000008977;ENSSSCG00000008953;ENSSSCG00000001952	K12671+K10030+K04734

## Sheet: Table S7
KEGG_A_class	KEGG_B_class	Pathway	Out (54)	All (6653)	P-value	Q-value	Pathway ID	Genes	K_IDs
Metabolism	Amino acid metabolism	Phenylalanine metabolism	3	22	0.000697997	0.0617608	ko00360	ENSSSCG00000017383;ENSSSCG00000026298;ENSSSCG00000025630	K00276+K00129+K00129
Metabolism	Amino acid metabolism	Tyrosine metabolism	3	32	0.00212287	0.0617608	ko00350	ENSSSCG00000017383;ENSSSCG00000026298;ENSSSCG00000025630	K00276+K00129+K00129
Human Diseases	Cancers	Pathways in cancer	10	434	0.00224072	0.0617608	ko05200	ENSSSCG00000006115;ENSSSCG00000010414;ENSSSCG00000002866;ENSSSCG00000004207;ENSSSCG00000000857;ENSSSCG00000027367;ENSSSCG00000010698;ENSSSCG00000028873;ENSSSCG00000009086;ENSSSCG00000016111	K10053+K10031+K09055+K05637+K05459+K05093+K05093+K04363+K18497+K02432
Human Diseases	Infectious diseases	Pertussis	4	69	0.00226851	0.0617608	ko05133	ENSSSCG00000013181;ENSSSCG00000001427;ENSSSCG00000028711;ENSSSCG00000001422	K04001+K03989+K01370+K01332
Metabolism	Metabolism of other amino acids	beta-Alanine metabolism	3	33	0.00232183	0.0617608	ko00410	ENSSSCG00000017383;ENSSSCG00000026298;ENSSSCG00000025630	K00276+K00129+K00129
Organismal Systems	Immune system	Complement and coagulation cascades	4	75	0.00307709	0.0682089	ko04610	ENSSSCG00000013181;ENSSSCG00000001427;ENSSSCG00000007115;ENSSSCG00000001422	K04001+K03989+K03907+K01332
Cellular Processes	Cellular commiunity	Signaling pathways regulating pluripotency of stem cells	5	130	0.00387537	0.0736321	ko04550	ENSSSCG00000000857;ENSSSCG00000027367;ENSSSCG00000010698;ENSSSCG00000009086;ENSSSCG00000016111	K05459+K05093+K05093+K18497+K02432
Environmental Information Processing	Signal transduction	PI3K-Akt signaling pathway	8	355	0.00732647	0.121802	ko04151	ENSSSCG00000023611;ENSSSCG00000004207;ENSSSCG00000000857;ENSSSCG00000027367;ENSSSCG00000010698;ENSSSCG00000004012;ENSSSCG00000028873;ENSSSCG00000009086	K06252+K05637+K05459+K05093+K05093+K04659+K04363+K18497
Human Diseases	Cancers	Prostate cancer	4	99	0.00825972	0.12206	ko05215	ENSSSCG00000000857;ENSSSCG00000027367;ENSSSCG00000010698;ENSSSCG00000028873	K05459+K05093+K05093+K04363
Metabolism	Carbohydrate metabolism	Glycolysis / Gluconeogenesis	3	56	0.0103465	0.125099	ko00010	ENSSSCG00000017904;ENSSSCG00000026298;ENSSSCG00000025630	K01689+K00129+K00129
Metabolism	Amino acid metabolism	Lysine degradation	3	56	0.0103465	0.125099	ko00310	ENSSSCG00000016613;ENSSSCG00000011689;ENSSSCG00000026153	K14157+K13645+K00626
Metabolism	Amino acid metabolism	Histidine metabolism	2	24	0.0159209	0.165103	ko00340	ENSSSCG00000026298;ENSSSCG00000025630	K00129+K00129
Human Diseases	Cancers	Central carbon metabolism in cancer	3	66	0.0161379	0.165103	ko05230	ENSSSCG00000027367;ENSSSCG00000010698;ENSSSCG00000028873	K05093+K05093+K04363
Human Diseases	Cancers	Proteoglycans in cancer	5	202	0.0232897	0.221252	ko05205	ENSSSCG00000000916;ENSSSCG00000000857;ENSSSCG00000000915;ENSSSCG00000009086;ENSSSCG00000016111	K08122+K05459+K04660+K18497+K02432
Human Diseases	Cancers	Melanoma	3	84	0.0303548	0.237434	ko05218	ENSSSCG00000000857;ENSSSCG00000028873;ENSSSCG00000009086	K05459+K04363+K18497
Environmental Information Processing	Signal transduction	Rap1 signaling pathway	5	217	0.0305319	0.237434	ko04015	ENSSSCG00000000857;ENSSSCG00000027367;ENSSSCG00000010698;ENSSSCG00000028873;ENSSSCG00000009086	K05459+K05093+K05093+K04363+K18497
Environmental Information Processing	Signal transduction	Ras signaling pathway	5	218	0.0310602	0.237434	ko04014	ENSSSCG00000000857;ENSSSCG00000027367;ENSSSCG00000010698;ENSSSCG00000028873;ENSSSCG00000009086	K05459+K05093+K05093+K04363+K18497
Cellular Processes	Cellular commiunity	Focal adhesion	5	220	0.0321339	0.237434	ko04510	ENSSSCG00000023611;ENSSSCG00000004207;ENSSSCG00000000857;ENSSSCG00000004012;ENSSSCG00000028873	K06252+K05637+K05459+K04659+K04363
Human Diseases	Cancers	Transcriptional misregulation in cancers	4	154	0.035705	0.238952	ko05202	ENSSSCG00000006115;ENSSSCG00000024591;ENSSSCG00000002866;ENSSSCG00000000857	K10053+K09431+K09055+K05459
Metabolism	Carbohydrate metabolism	Propanoate metabolism	2	37	0.0359326	0.238952	ko00640	ENSSSCG00000009937;ENSSSCG00000026153	K01946+K00626
Human Diseases	Infectious diseases	Staphylococcus aureus infection	2	39	0.0395716	0.25062	ko05150	ENSSSCG00000001427;ENSSSCG00000001422	K03989+K01332
Environmental Information Processing	Signaling molecules and interaction	ECM-receptor interaction	3	99	0.0459298	0.267034	ko04512	ENSSSCG00000023611;ENSSSCG00000004207;ENSSSCG00000004012	K06252+K05637+K04659
Cellular Processes	Transport and catabolism	Endocytosis	5	243	0.0461789	0.267034	ko04144	ENSSSCG00000016857;ENSSSCG00000011848;ENSSSCG00000027367;ENSSSCG00000010698;ENSSSCG00000028873	K12475+K06503+K05093+K05093+K04363
Metabolism	Xenobiotics biodegradation and metabolism	Drug metabolism - cytochrome P450	2	44	0.0492445	0.272771	ko00982	ENSSSCG00000026298;ENSSSCG00000025630	K00129+K00129

## Sheet: Table S8
Biological process	The number of reference genes in the category	The number of genes in the gene set and also in the category	The expected number in the category	Ratio of enrichment	P-value from hypergeometric test	P-value adjusted by the multiple test adjustment	Genes
cell proliferation	1548	36	9.42	3.82	1.98e-13	2.46e-10	BCAR1/CBFA2T3/CCL5/CDC25B/CHST11/CSPG4/CXCL5/E2F1/EGR1/ETS1/FLT1/FOSL1/FSCN1/HBEGF/HMGA1/ICOSLG/IL1A/IQGAP3/ITGB3/JAG1/JARID2/KIF2C/LIF/LIPG/LRRC32/MKI67/PDGFA/PMAIP1/PNP/TBX3/TCF19/TGFB1/TGM2/TICAM1/TNFAIP3/TNFSF9/
regulation of cell proliferation	1177	28	7.16	3.91	1.46e-10	9.08e-08	CCL5/CDC25B/CHST11/CXCL5/E2F1/EGR1/ETS1/FLT1/FOSL1/HBEGF/HMGA1/ICOSLG/IL1A/IQGAP3/ITGB3/JAG1/JARID2/LIF/LRRC32/PDGFA/PMAIP1/PNP/TBX3/TGFB1/TGM2/TICAM1/TNFAIP3/TNFSF9/
positive regulation of cell proliferation	655	20	3.98	5.02	1.7e-09	7.05e-07	CCL5/CDC25B/CXCL5/E2F1/EGR1/ETS1/FLT1/FOSL1/HBEGF/ICOSLG/IQGAP3/ITGB3/LIF/PDGFA/PNP/TBX3/TGFB1/TGM2/TICAM1/TNFAIP3/
M phase	539	18	3.28	5.49	3.15e-09	9.8e-07	AURKA/CCNA2/CCNB3/CCNF/CDC25B/CDCA3/CIT/FOSL1/H2AFX/IL1A/INCENP/KIF18B/KIF2C/LIF/MKI67/MYBL2/RANGAP1/TGFB1/
cell cycle phase	860	21	5.23	4.01	3.22e-08	8.01e-06	AURKA/CCNA2/CCNB3/CCNF/CDC25B/CDCA3/CDT1/CIT/E2F1/FOSL1/H2AFX/IL1A/INCENP/IQGAP3/KIF18B/KIF2C/LIF/MKI67/MYBL2/RANGAP1/TGFB1/
M phase of mitotic cell cycle	379	14	2.31	6.07	6.32e-08	1.16e-05	AURKA/CCNA2/CCNF/CDC25B/CDCA3/CIT/FOSL1/IL1A/INCENP/KIF18B/KIF2C/MYBL2/RANGAP1/TGFB1/
response to lipid	582	17	3.54	4.8	6.54e-08	1.16e-05	AURKA/CCL5/E2F1/EGR1/ETS1/FOSL1/IL18BP/IL1A/PDGFA/PLAT/SDC1/SOCS1/SOCS2/TGFB1/TICAM1/TNFAIP3/TRH/
positive regulation of macromolecule metabolic process	1842	30	11.21	2.68	1.97e-07	3.06e-05	CBFA2T3/CCL5/CCNA2/CDC25B/CSPG4/E2F1/EGR1/ETS1/FHOD1/FLT1/FOSL1/GLIS1/H2AFX/HEYL/HMGA1/ICOSLG/IER3/IL1A/IQGAP3/ITGB3/JAG1/JARID2/LIF/LRRC32/PDGFA/TBX3/TGFB1/TICAM1/TNFAIP3/TNIP1/
mitosis	368	13	2.24	5.81	3.27e-07	3.7e-05	AURKA/CCNA2/CCNF/CDC25B/CDCA3/CIT/FOSL1/IL1A/INCENP/KIF18B/KIF2C/MYBL2/RANGAP1/
nuclear division	368	13	2.24	5.81	3.27e-07	3.7e-05	AURKA/CCNA2/CCNF/CDC25B/CDCA3/CIT/FOSL1/IL1A/INCENP/KIF18B/KIF2C/MYBL2/RANGAP1/
positive regulation of metabolic process	1981	31	12.05	2.57	2.78e-07	3.7e-05	CBFA2T3/CCL5/CCNA2/CDC25B/CSPG4/E2F1/EGR1/ETS1/FHOD1/FLT1/FOSL1/GLIS1/H2AFX/HEYL/HMGA1/ICOSLG/IER3/IL1A/IQGAP3/ITGB3/JAG1/JARID2/LIF/LRRC32/PDGFA/PMAIP1/TBX3/TGFB1/TICAM1/TNFAIP3/TNIP1/
response to organic cyclic compound	580	16	3.53	4.53	3.64e-07	3.77e-05	AURKA/CCL5/EGR1/ETS1/FOSL1/IL1A/PDGFA/PLAT/PMAIP1/SDC1/SOCS1/SOCS2/TGFB1/TICAM1/TRH/VGF/
organelle fission	392	13	2.38	5.45	6.69e-07	6.4e-05	AURKA/CCNA2/CCNF/CDC25B/CDCA3/CIT/FOSL1/IL1A/INCENP/KIF18B/KIF2C/MYBL2/RANGAP1/
angiogenesis involved in wound healing	13	4	0.08	50.58	8.77e-07	6.62e-05	ETS1/ITGB3/MCAM/TNFAIP3/
cell division	465	14	2.83	4.95	7.61e-07	6.62e-05	ADAMTS14/ADAMTS4/ASF1B/AURKA/BCAR1/CBFA2T3/CCL5/CCNA2/CCNB3/CCNF/CDC25B/CHST11/CHST2/CIT/CKB/COL5A3/COL7A1/CSPG4/CXCL5/E2F1/EGR1/ETS1/FLT1/FOSL1/GEM/GUCY1B3/H2AFX/HBEGF/HCN1/HEYL/ICOSLG/IER3/IL18BP/IL1A/IQGAP3/ITGB3/JAG1/JARID2/KIF2C/LIF/LIPG/LRRC32/MCAM/MKI67/PDE4B/PDGFA/PEAR1/PHLDA2/PLAT/PMAIP1/PMEPA1/PNP/RANGAP1/RGMA/SDC1/SEMA7A/SMTN/SOCS1/SOCS2/TBX3/TGFB1/TGM2/TICAM1/TNFAIP3/TNFSF9/TNIP1/TRH/…
mitotic cell cycle	780	18	4.75	3.79	8.45e-07	6.62e-05	AURKA/BCAR1/CCNA2/CCNB3/CCNF/CDC25B/CDCA3/CIT/IL1A/INCENP/KIF18B/KIF2C/PDGFA/TGFB1/
single-organism process	7682	69	46.73	1.48	9.04e-07	6.62e-05	AURKA/CCNA2/CCNB3/CCNF/CDC25B/CDCA3/CDT1/CIT/E2F1/FOSL1/IL1A/INCENP/IQGAP3/KIF18B/KIF2C/MYBL2/RANGAP1/TGFB1/
multicellular organismal process	5644	57	34.33	1.66	9.66e-07	6.62e-05	ADAMTS14/ADAMTS4/ASF1B/BCAR1/CBFA2T3/CCL5/CCNF/CDC25B/CHST11/CHST2/CIT/CKB/COL5A3/COL7A1/CSPG4/E2F1/EGR1/ETS1/FLT1/FOSL1/GUCY1B3/H2AFX/HBEGF/HCN1/HEYL/ICOSLG/IER3/IL1A/IQGAP3/ITGB3/JAG1/JARID2/KIF2C/LIF/LIPG/LRRC32/MCAM/MKI67/PAPPA/PDGFA/PEAR1/PHLDA2/PLAT/PNP/RGMA/SDC1/SEMA7A/SMTN/SOCS1/TBX3/TGFB1/TGM2/TICAM1/TNFAIP3/TRH/VGF/WHSC1/
cell cycle process	1062	21	6.46	3.25	1.1e-06	6.62e-05	AURKA/CCNA2/CCNB3/CCNF/CDC25B/CDCA3/CDT1/CIT/E2F1/FOSL1/H2AFX/IL1A/INCENP/IQGAP3/KIF18B/KIF2C/LIF/MKI67/MYBL2/RANGAP1/TGFB1/
negative regulation of cellular process	2840	37	17.28	2.14	1.23e-06	6.62e-05	ARID5A/CCL5/CCNA2/CCNF/CDT1/CHST11/CIT/E2F1/EGR1/ETS1/FOSL1/GLIS1/H2AFX/HBEGF/HEYL/HMGA1/IER3/IL18BP/IL1A/ITGB3/JAG1/JARID2/LIF/LRRC32/NFKBIE/PDGFA/PLAT/PMAIP1/PMEPA1/SOCS1/SOCS2/TBX3/TGFB1/TNFAIP3/TNIP1/TRH/WHSC1/
negative regulation of biological process	3110	39	18.92	2.06	1.4e-06	6.62e-05	ARID5A/CCL5/CCNA2/CCNF/CDT1/CHST11/CIT/E2F1/EGR1/ETS1/FOSL1/GLIS1/H2AFX/HBEGF/HEYL/HMGA1/IER3/IL18BP/IL1A/IQGAP3/ITGB3/JAG1/JARID2/LIF/LRRC32/NFKBIE/PDGFA/PLAT/PMAIP1/PMEPA1/RANGAP1/SOCS1/SOCS2/TBX3/TGFB1/TNFAIP3/TNIP1/TRH/WHSC1/
blood vessel development	492	14	2.99	4.68	1.49e-06	6.62e-05	CCL5/CSPG4/EGR1/ETS1/FLT1/IL1A/ITGB3/JAG1/LIF/MCAM/PDGFA/PLAT/TBX3/TNFAIP3/
cell cycle	1393	24	8.47	2.83	1.86e-06	6.62e-05	AURKA/CCNA2/CCNB3/CCNF/CDC25B/CDCA3/CDT1/CIT/E2F1/ETS1/FOSL1/H2AFX/IL1A/INCENP/IQGAP3/KIF18B/KIF2C/LIF/MKI67/MYBL2/RANGAP1/TBX3/TGFB1/TNFAIP3/
regulation of intracellular protein kinase cascade	683	16	4.15	3.85	3.12e-06	6.62e-05	CCL5/CSPG4/FLT1/HBEGF/IL1A/IQGAP3/LIF/PDGFA/SEMA7A/SOCS1/SOCS2/TGFB1/TGM2/TICAM1/TNFAIP3/TNIP1/
response to steroid hormone stimulus	306	11	1.86	5.91	2.4e-06	6.62e-05	AURKA/CCL5/ETS1/FOSL1/PDGFA/PLAT/SDC1/SOCS1/SOCS2/TGFB1/TRH/
single-multicellular organism process	5612	56	34.14	1.64	2.23e-06	6.62e-05	ADAMTS14/ADAMTS4/ASF1B/BCAR1/CBFA2T3/CCL5/CCNF/CDC25B/CHST11/CHST2/CIT/CKB/COL5A3/COL7A1/CSPG4/E2F1/EGR1/ETS1/FLT1/FOSL1/GUCY1B3/H2AFX/HBEGF/HCN1/HEYL/ICOSLG/IER3/IL1A/IQGAP3/ITGB3/JAG1/JARID2/KIF2C/LIF/LIPG/LRRC32/MCAM/MKI67/PDGFA/PEAR1/PHLDA2/PLAT/PNP/RGMA/SDC1/SEMA7A/SMTN/SOCS1/TBX3/TGFB1/TGM2/TICAM1/TNFAIP3/TRH/VGF/WHSC1/
vasculature development	517	14	3.15	4.45	2.66e-06	6.62e-05	CCL5/CSPG4/EGR1/ETS1/FLT1/IL1A/ITGB3/JAG1/LIF/MCAM/PDGFA/PLAT/TBX3/TNFAIP3/
positive regulation of cellular metabolic process	1880	28	11.44	2.45	3.59e-06	6.62e-05	CBFA2T3/CCL5/CCNA2/CDC25B/CSPG4/E2F1/EGR1/ETS1/FHOD1/FLT1/FOSL1/GLIS1/H2AFX/HEYL/HMGA1/ICOSLG/IL1A/IQGAP3/ITGB3/JAG1/JARID2/LIF/PDGFA/PMAIP1/TBX3/TGFB1/TICAM1/TNIP1/
positive regulation of cellular process	3113	38	18.94	2.01	4.2e-06	6.62e-05	AURKA/BCAR1/CBFA2T3/CCL5/CCNA2/CDC25B/CSPG4/CXCL5/E2F1/EGR1/ETS1/FHOD1/FLT1/FOSL1/GLIS1/H2AFX/HBEGF/HEYL/HMGA1/ICOSLG/IER3/IL1A/IQGAP3/ITGB3/JAG1/JARID2/LIF/PDGFA/PMAIP1/PNP/SEMA7A/TBX3/TGFB1/TGM2/TICAM1/TNFAIP3/TNIP1/TRH/
system development	3521	41	21.42	1.91	4.54e-06	6.62e-05	ADAMTS4/CBFA2T3/CCL5/CCNF/CHST11/CIT/CKB/COL5A3/COL7A1/CSPG4/E2F1/EGR1/ETS1/FLT1/HBEGF/HCN1/HEYL/IL1A/IQGAP3/ITGB3/JAG1/JARID2/KIF2C/LIF/MCAM/MKI67/PDGFA/PHLDA2/PLAT/PNP/RGMA/SDC1/SEMA7A/SMTN/SOCS1/TBX3/TGFB1/TGM2/TNFAIP3/VGF/WHSC1/
developmental process	4572	48	27.81	1.73	7.14e-06	6.62e-05	ADAMTS4/ASF1B/CBFA2T3/CCL5/CCNF/CDC25B/CHST11/CHST2/CIT/CKB/COL5A3/COL7A1/CSPG4/E2F1/EGR1/ETS1/FLT1/HBEGF/HCN1/HEYL/HMGA1/IER3/IL1A/IQGAP3/ITGB3/JAG1/JARID2/KIF2C/LIF/MCAM/MKI67/PAPPA/PDGFA/PHLDA2/PLAT/PNP/RGMA/SDC1/SEMA7A/SMTN/SOCS1/SOCS2/TBX3/TGFB1/TGM2/TNFAIP3/VGF/WHSC1/
positive regulation of biological process	3439	40	20.92	1.91	6.76e-06	6.62e-05	AURKA/BCAR1/CBFA2T3/CCL5/CCNA2/CDC25B/CSPG4/CXCL5/E2F1/EGR1/ETS1/FHOD1/FLT1/FOSL1/GLIS1/H2AFX/HBEGF/HEYL/HMGA1/ICOSLG/IER3/IL1A/IQGAP3/ITGB3/JAG1/JARID2/LIF/LIPG/LRRC32/PDGFA/PMAIP1/PNP/SEMA7A/TBX3/TGFB1/TGM2/TICAM1/TNFAIP3/TNIP1/TRH/
regulation of response to stress	733	16	4.46	3.59	7.67e-06	6.62e-05	CCL5/H2AFX/HBEGF/HMGA1/IER3/IL1A/PDGFA/PLAT/PMAIP1/SEMA7A/SOCS1/TGFB1/TGM2/TICAM1/TNFAIP3/TNIP1/
regulation of vasculature development	166	8	1.01	7.92	7.51e-06	6.62e-05	CCL5/EGR1/ETS1/FLT1/IL1A/LIF/PDGFA/TNFAIP3/
response to wounding	1109	20	6.75	2.96	8.45e-06	6.62e-05	BCAR1/CCL5/CHST2/ETS1/GUCY1B3/HBEGF/IER3/IL1A/ITGB3/KIF2C/MCAM/PDGFA/PLAT/SDC1/SEMA7A/TGFB1/TGM2/TICAM1/TNFAIP3/TNIP1/
angiogenesis	357	11	2.17	5.06	1.04e-05	6.62e-05	CCL5/CSPG4/ETS1/FLT1/IL1A/ITGB3/JAG1/LIF/MCAM/PDGFA/TNFAIP3/
blood vessel morphogenesis	433	12	2.63	4.56	1.17e-05	6.62e-05	CCL5/CSPG4/ETS1/FLT1/IL1A/ITGB3/JAG1/LIF/MCAM/PDGFA/PLAT/TNFAIP3/
cardiovascular system development	754	16	4.59	3.49	1.09e-05	6.62e-05	CCL5/CSPG4/EGR1/ETS1/FLT1/HEYL/IL1A/ITGB3/JAG1/LIF/MCAM/PDGFA/PLAT/TBX3/TNFAIP3/WHSC1/
circulatory system development	754	16	4.59	3.49	1.09e-05	6.62e-05	CCL5/CSPG4/EGR1/ETS1/FLT1/HEYL/IL1A/ITGB3/JAG1/LIF/MCAM/PDGFA/PLAT/TBX3/TNFAIP3/WHSC1/
regulation of cell communication	2034	28	12.37	2.26	1.64e-05	6.62e-05	CCL5/CHST11/CSPG4/EGR1/FLT1/HBEGF/HEYL/IL18BP/IL1A/IQGAP3/ITGB3/JAG1/LIF/PDGFA/PLAT/PMAIP1/PMEPA1/RANGAP1/SEMA7A/SOCS1/SOCS2/TGFB1/TGM2/TICAM1/TNFAIP3/TNIP1/TRH/VGF/

## Sheet: Table S9
PathwayName	the number of reference genes in the category	the number of genes in the gene set and also in the category	the expected number in the category	ratio of enrichment	p value from hypergeometric test	p value adjusted by the multiple test adjustment	#Gene
Cytokine-cytokine receptor interaction	265	8	0.6	13.42	1.65e-07	6.76e-06	CCL5/CXCL5/FLT1/IL1A/LIF/PDGFA/TGFB1/TNFSF9/
Rheumatoid arthritis	91	5	0.2	24.43	2.07e-06	4.24e-05	CCL5/CXCL5/FLT1/IL1A/TGFB1/
Cell cycle	124	5	0.28	17.93	9.45e-06	0.0001	CCNA2/CCNB3/CDC25B/E2F1/TGFB1/
Osteoclast differentiation	128	5	0.29	17.37	1.1e-05	0.0001	FOSL1/IL1A/ITGB3/SOCS1/TGFB1/
Prion diseases	35	3	0.08	38.11	6.85e-05	0.0006	CCL5/EGR1/IL1A/
Focal adhesion	200	5	0.45	11.12	9.3e-05	0.0006	BCAR1/COL5A3/FLT1/ITGB3/PDGFA/
ECM-receptor interaction	85	3	0.19	15.69	0.001	0.005	COL5A3/ITGB3/SDC1/
Progesterone-mediated oocyte maturation	86	3	0.19	15.51	0.001	0.005	CCNA2/CCNB3/CDC25B/
Gap junction	90	3	0.2	14.82	0.0011	0.005	GUCY1B3/PDGFA/TUBB6/
Regulation of actin cytoskeleton	213	4	0.48	8.35	0.0014	0.0057	BCAR1/IQGAP3/ITGB3/PDGFA/
Chagas disease (American trypanosomiasis)	104	3	0.23	12.83	0.0017	0.0063	CCL5/TGFB1/TICAM1/
MAPK signaling pathway	268	4	0.6	6.64	0.0032	0.0109	CDC25B/IL1A/PDGFA/TGFB1/
Jak-STAT signaling pathway	155	3	0.35	8.61	0.0052	0.0142	LIF/SOCS1/SOCS2/
Type II diabetes mellitus	48	2	0.11	18.53	0.0053	0.0142	SOCS1/SOCS2/
Intestinal immune network for IgA production	48	2	0.11	18.53	0.0053	0.0142	ICOSLG/TGFB1/
Purine metabolism	162	3	0.36	8.23	0.0059	0.0142	GUCY1B3/PDE4B/PNP/
Malaria	51	2	0.11	17.44	0.0059	0.0142	SDC1/TGFB1/
Pathways in cancer	326	4	0.73	5.46	0.0064	0.0146	E2F1/ETS1/PDGFA/TGFB1/
NOD-like receptor signaling pathway	58	2	0.13	15.33	0.0076	0.0164	CCL5/TNFAIP3/
Leishmaniasis	72	2	0.16	12.35	0.0116	0.0174	IL1A/TGFB1/
Glioma	65	2	0.15	13.68	0.0095	0.0174	E2F1/PDGFA/
p53 signaling pathway	68	2	0.15	13.08	0.0104	0.0174	CCNB3/PMAIP1/
Pancreatic cancer	70	2	0.16	12.7	0.0109	0.0174	E2F1/TGFB1/
Chronic myeloid leukemia	73	2	0.16	12.18	0.0119	0.0174	E2F1/TGFB1/
Epithelial cell signaling in Helicobacter pylori infection	68	2	0.15	13.08	0.0104	0.0174	CCL5/HBEGF/
Renal cell carcinoma	70	2	0.16	12.7	0.0109	0.0174	ETS1/TGFB1/
Chemokine signaling pathway	189	3	0.43	7.06	0.009	0.0174	BCAR1/CCL5/CXCL5/
Melanoma	71	2	0.16	12.52	0.0112	0.0174	E2F1/PDGFA/
Hypertrophic cardiomyopathy (HCM)	83	2	0.19	10.71	0.0151	0.0213	ITGB3/TGFB1/
Dilated cardiomyopathy	90	2	0.2	9.88	0.0176	0.0226	ITGB3/TGFB1/
Prostate cancer	89	2	0.2	9.99	0.0173	0.0226	E2F1/PDGFA/
Hematopoietic cell lineage	88	2	0.2	10.1	0.0169	0.0226	IL1A/ITGB3/
Toll-like receptor signaling pathway	102	2	0.23	8.72	0.0223	0.0277	CCL5/TICAM1/
Amoebiasis	106	2	0.24	8.39	0.0239	0.0288	COL5A3/TGFB1/
Cell adhesion molecules (CAMs)	133	2	0.3	6.69	0.0363	0.0413	ICOSLG/SDC1/
Toxoplasmosis	132	2	0.3	6.74	0.0358	0.0413	SOCS1/TGFB1/
Insulin signaling pathway	138	2	0.31	6.44	0.0388	0.043	SOCS1/SOCS2/
Wnt signaling pathway	150	2	0.34	5.93	0.0451	0.0487	DAAM2/FOSL1/
Phagosome	153	2	0.34	5.81	0.0468	0.0492	ITGB3/TUBB6/

## Sheet: Table S10
Biological process	The number of reference genes in the category	The number of genes in the gene set and also in the category	The expected number in the category	Ratio of enrichment	P-value from hypergeometric test	P-value adjusted by the multiple test adjustment	Genes
regulation of developmental process	1436	21	5.2	4.04	8.52e-09	8.5e-06	ADM/ASPN/ATF5/CEBPA/CXCL12/DAB2/EPHA1/FGF2/FGFR2/FZD7/GPM6B/IGF1/NEFM/NUAK1/PKDCC/RHOU/SIX1/SNAI2/SPP1/THBS2/TLR3/
regeneration	131	8	0.47	16.86	2.11e-08	8.55e-06	ADM/CEBPA/CXCL12/ENO3/FZD7/IGF1/SPP1/VCAN/
regulation of multicellular organismal development	1098	18	3.98	4.53	2.57e-08	8.55e-06	ADM/ASPN/ATF5/CXCL12/DAB2/EPHA1/FGF2/FGFR2/FZD7/GPM6B/IGF1/NEFM/PKDCC/SIX1/SNAI2/SPP1/THBS2/TLR3/
regulation of multicellular organismal process	1772	22	6.42	3.43	6.5e-08	1.62e-05	ADM/ASPN/ATF5/CEBPA/CXCL12/DAB2/EPHA1/FGF2/FGFR2/FZD7/GPM6B/IGF1/NEFM/PKDCC/PLK2/SIX1/SNAI2/SPP1/TFRC/THBD/THBS2/TLR3/
positive regulation of multicellular organismal process	491	12	1.78	6.75	1.36e-07	2.26e-05	ADM/FGF2/FGFR2/GPM6B/IGF1/PKDCC/PLK2/SIX1/SPP1/TFRC/THBD/TLR3/
regulation of anatomical structure morphogenesis	591	13	2.14	6.07	1.27e-07	2.26e-05	ADM/ASPN/CXCL12/DAB2/EPHA1/FGF2/FGFR2/FZD7/NEFM/RHOU/SIX1/SPP1/THBS2/
cell development	1461	19	5.29	3.59	3.72e-07	5.3e-05	ACTC1/ADM/ARID5B/ATF5/CEBPA/CXCL12/DAB2/EPHA1/ETV1/FGF2/FGFR2/FZD7/GRIN3A/IGF1/NEFM/SIX1/SNAI2/SPP1/VCAN/
positive regulation of developmental process	682	13	2.47	5.26	6.56e-07	6.81e-05	ADM/CEBPA/CXCL12/DAB2/EPHA1/FGF2/FGFR2/GPM6B/IGF1/PKDCC/SIX1/SNAI2/THBS2/
ossification	282	9	1.02	8.81	6.82e-07	6.81e-05	ASPN/CEBPA/FGF2/FGFR2/GPM6B/IGF1/PKDCC/SNAI2/SPP1/
developmental growth	282	9	1.02	8.81	6.82e-07	6.81e-05	ADM/CXCL12/ENO3/FGF2/FGFR2/FZD7/IGF1/SIX1/SPP1/
cell adhesion	954	15	3.46	4.34	8.8e-07	6.93e-05	AOC3/CCDC80/CHST4/CXCL12/EPHA1/FZD7/GPM6B/ISLR/NUAK1/SNAI2/SNED1/SPP1/THBS2/VCAN/WISP2/
anatomical structure morphogenesis	2055	22	7.44	2.96	9e-07	6.93e-05	ACTC1/ADM/ARID5B/ASPN/CEBPA/CXCL12/DAB2/DCN/ENO3/EPHA1/ETV1/FGF2/FGFR2/FZD7/IGF1/NEFM/RHOU/SIX1/SNAI2/SPP1/THBS2/VCAN/
biological adhesion	956	15	3.46	4.33	9.03e-07	6.93e-05	AOC3/CCDC80/CHST4/CXCL12/EPHA1/FZD7/GPM6B/ISLR/NUAK1/SNAI2/SNED1/SPP1/THBS2/VCAN/WISP2/
regulation of ossification	157	7	0.57	12.31	1.46e-06	0.0001	CEBPA/FGF2/FGFR2/GPM6B/IGF1/PKDCC/SNAI2/
cardiovascular system development	754	13	2.73	4.76	2.02e-06	0.0001	ACTC1/ADM/AHR/CXCL12/EPHA1/FGF2/FGFR2/FZD7/IGF1/SIX1/SNAI2/THBS2/VCAN/
regulation of cell differentiation	1012	15	3.67	4.09	1.85e-06	0.0001	ADM/ATF5/CEBPA/CXCL12/DAB2/FGF2/FGFR2/FZD7/IGF1/NEFM/PKDCC/SIX1/SNAI2/SPP1/TLR3/
circulatory system development	754	13	2.73	4.76	2.02e-06	0.0001	ACTC1/ADM/AHR/CXCL12/EPHA1/FGF2/FGFR2/FZD7/IGF1/SIX1/SNAI2/THBS2/VCAN/
anatomical structure development	4030	31	14.6	2.12	2.17e-06	0.0001	ACTC1/ADM/AHR/ARID5B/ASAH1/ASPN/ATF5/CEBPA/CXCL12/DAB2/DCN/ENO3/EPHA1/ETV1/FGF2/FGFR2/FZD7/GPM6B/GRIN3A/IGF1/NEFM/PKDCC/RHOU/SIX1/SNAI2/SPP1/TFRC/THBD/THBS2/TLR3/VCAN/
organ morphogenesis	802	13	2.91	4.47	4e-06	0.0002	ACTC1/ADM/ARID5B/ASPN/CEBPA/CXCL12/DAB2/DCN/FGF2/FGFR2/IGF1/SIX1/SNAI2/
biomineral tissue development	113	6	0.41	14.66	3.17e-06	0.0002	ASPN/FGFR2/GPM6B/IGF1/PKDCC/SPP1/
response to wounding	1109	15	4.02	3.73	5.73e-06	0.0003	ADM/AOC3/CEBPA/CHST4/DCN/ENO3/FGF2/FZD7/IGF1/SLC7A8/SPP1/TFRC/THBD/TLR3/VCAN/
osteoblast differentiation	138	6	0.5	12	1.01e-05	0.0003	CEBPA/FGF2/FGFR2/IGF1/SNAI2/SPP1/
cell migration	841	13	3.05	4.27	6.71e-06	0.0003	ARID5B/CHST4/CXCL12/EPHA1/FGF2/IGF1/IL16/SIX1/SLC7A8/SNAI2/SPP1/THBD/VCAN/
response to chemical stimulus	2746	24	9.95	2.41	8.9e-06	0.0003	ACTC1/ADM/AHR/ALDH1A1/AOC3/ASAH1/CEBPA/CXCL12/DCN/DNAJB9/ENO3/ETV1/FGF2/FGFR2/FZD7/GRIN3A/IL16/PLOD2/SLC7A8/SNAI2/SPP1/TFRC/THBD/TLR3/
anatomical structure formation involved in morphogenesis	1594	18	5.77	3.12	6.51e-06	0.0003	ACTC1/ADM/ARID5B/ASPN/CXCL12/DAB2/EPHA1/ETV1/FGF2/FGFR2/FZD7/IGF1/NEFM/SIX1/SNAI2/SPP1/THBS2/VCAN/
organ development	2552	23	9.25	2.49	9.24e-06	0.0003	ACTC1/ADM/AHR/ARID5B/ASAH1/ASPN/CEBPA/CXCL12/DAB2/DCN/ETV1/FGF2/FGFR2/FZD7/GPM6B/IGF1/PKDCC/SIX1/SNAI2/SPP1/TFRC/TLR3/VCAN/
system development	3521	28	12.76	2.2	5.79e-06	0.0003	ACTC1/ADM/AHR/ARID5B/ASAH1/ASPN/ATF5/CEBPA/CXCL12/DAB2/DCN/EPHA1/ETV1/FGF2/FGFR2/FZD7/GPM6B/GRIN3A/IGF1/NEFM/PKDCC/SIX1/SNAI2/SPP1/TFRC/THBS2/TLR3/VCAN/
tissue development	1449	17	5.25	3.24	7.78e-06	0.0003	ACTC1/ADM/ARID5B/ASPN/CXCL12/DAB2/DCN/ENO3/FGF2/FGFR2/FZD7/GPM6B/IGF1/PKDCC/SIX1/SNAI2/SPP1/
negative regulation of biological process	3110	26	11.27	2.31	6.54e-06	0.0003	ADM/AHR/ARID5B/ASPN/ATF5/CEBPA/CXCL12/DAB2/EPHA1/FGF2/FGFR2/FZD7/GPM6B/GRIN3A/IGF1/KDM5B/OGN/PKDCC/PLK2/SIX1/SNAI2/SPP1/THBD/THBS2/TLR3/WISP2/
negative regulation of cellular process	2840	24	10.29	2.33	1.61e-05	0.0004	ADM/AHR/ARID5B/ASPN/ATF5/CEBPA/CXCL12/DAB2/EPHA1/FGF2/FGFR2/FZD7/GPM6B/IGF1/KDM5B/OGN/PKDCC/PLK2/SIX1/SNAI2/SPP1/THBD/TLR3/WISP2/
vasculature development	517	10	1.87	5.34	1.38e-05	0.0004	ADM/AHR/CXCL12/EPHA1/FGF2/FGFR2/FZD7/IGF1/SIX1/THBS2/
bone mineralization	86	5	0.31	16.05	1.43e-05	0.0004	ASPN/FGFR2/GPM6B/IGF1/PKDCC/
cellular developmental process	2829	24	10.25	2.34	1.51e-05	0.0004	ACTC1/ADM/ARID5B/ATF5/CEBPA/CXCL12/DAB2/EPHA1/ETV1/FGF2/FGFR2/FZD7/GPM6B/GRIN3A/IGF1/NEFM/PKDCC/RHOU/SIX1/SNAI2/SPP1/TFRC/TLR3/VCAN/
cell motility	910	13	3.3	3.94	1.57e-05	0.0004	ARID5B/CHST4/CXCL12/EPHA1/FGF2/IGF1/IL16/SIX1/SLC7A8/SNAI2/SPP1/THBD/VCAN/
developmental process	4572	32	16.56	1.93	1.12e-05	0.0004	ACTC1/ADM/AHR/ARID5B/ASAH1/ASPN/ATF5/CEBPA/CXCL12/DAB2/DCN/ENO3/EPHA1/ETV1/FGF2/FGFR2/FZD7/GPM6B/GRIN3A/IGF1/NEFM/NUAK1/PKDCC/RHOU/SIX1/SNAI2/SPP1/TFRC/THBD/THBS2/TLR3/VCAN/
regulation of cellular component organization	1214	15	4.4	3.41	1.71e-05	0.0004	AHR/CXCL12/DAB2/EPHA1/FGF2/FGFR2/GPM6B/IGF1/NEFM/PLK2/RHOU/SNAI2/SPP1/THBS2/WISP2/
cellular component movement	1189	15	4.31	3.48	1.33e-05	0.0004	ACTC1/ARID5B/CHST4/CXCL12/EPHA1/FGF2/IGF1/IL16/NEFM/SIX1/SLC7A8/SNAI2/SPP1/THBD/VCAN/
localization of cell	910	13	3.3	3.94	1.57e-05	0.0004	ARID5B/CHST4/CXCL12/EPHA1/FGF2/IGF1/IL16/SIX1/SLC7A8/SNAI2/SPP1/THBD/VCAN/
regulation of intracellular protein transport	156	6	0.57	10.62	2.03e-05	0.0005	DAB2/FZD7/IGF1/PKDCC/SNAI2/TLR3/
cell differentiation	2665	23	9.65	2.38	1.93e-05	0.0005	ACTC1/ADM/ARID5B/ATF5/CEBPA/CXCL12/DAB2/EPHA1/ETV1/FGF2/FGFR2/FZD7/GPM6B/GRIN3A/IGF1/NEFM/PKDCC/SIX1/SNAI2/SPP1/TFRC/TLR3/VCAN//

[truncated: 4 more sheets: Table S11, Table S12, Table S13, Table S14]
